# Supplementary material
Source: PubMed Central journal article supplement (PMC8665847)
Supplement: mmc1.pdf [file mmc1.pdf]

## Supporting Information

### Design, synthesis and *in vitro* evaluation of novel SARS-CoV-2 3CL<sup>pro</sup> covalent inhibitors.

*Julia K. Stille,<sup>#,1</sup> Jevgenijs Tjutris,<sup>#,1</sup> Guanyu Wang,<sup>#,1</sup> Felipe A. Venegas,<sup>#,1</sup> Christopher Hennecker,<sup>1</sup> Andrés M. Rueda,<sup>1</sup> Itai Sharon,<sup>2</sup> Nicole Blaine,<sup>1</sup> Caitlin E. Miron,<sup>1</sup> Sharon Pinus,<sup>1</sup> Anne Labarre,<sup>1</sup> Jessica Plescia,<sup>1</sup> Mihai Burai Patrascu,<sup>1</sup> Xiaocong Zhang,<sup>1</sup> Alexander S. Wahba,<sup>1</sup> Danielle Vlaho,<sup>1</sup> Mitchell J. Huot,<sup>1</sup> T. Martin Schmeing,<sup>2</sup> Anthony K. Mittermaier<sup>\*,1</sup> and Nicolas Moitessier<sup>\*,1</sup>*

<sup>1</sup> Department of Chemistry, McGill University, 801 Sherbrooke St W, Montreal, QC, Canada H3A 0B8. <sup>2</sup> Department of Biochemistry, McGill University, 3649 Promenade Sir William Osler Montreal, QC, Canada H3G 0B1.

nicolas.moitessier@mcgill.ca

anthony.mittermaier@mcgill.ca

#### Table of content

---

|                                                                  |     |
|------------------------------------------------------------------|-----|
| 1. Purification of 3CL <sup>pro</sup> .....                      | 2   |
| 2. Dose-response curves.....                                     | 3   |
| 3. Time dependent IC <sub>50</sub> 's and Mass Spectrometry..... | 8   |
| 4. Isothermal Titration Calorimetry .....                        | 10  |
| 5. Crystallography .....                                         | 12  |
| 6. Compound purity .....                                         | 14  |
| 7. <sup>1</sup> H and <sup>13</sup> C NMR spectra.....           | 17  |
| 8. References.....                                               | 184 |

## 1. Purification of 3CL<sup>pro</sup>.

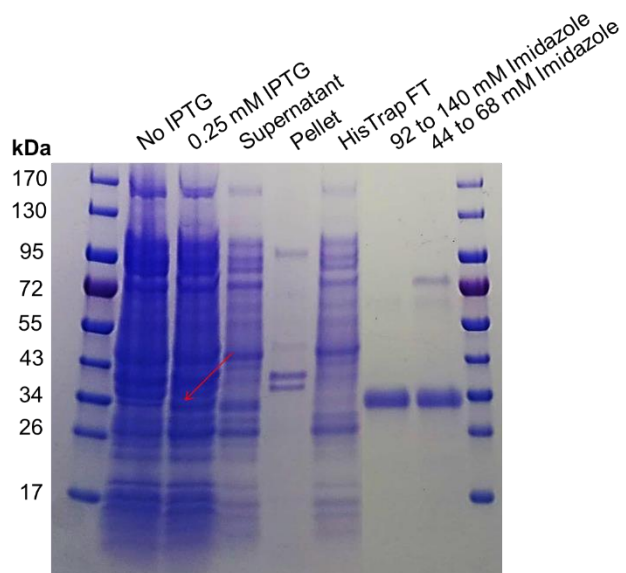

**Figure S1.** SDS-PAGE at each of the purification step.

## 2. Dose-response curves

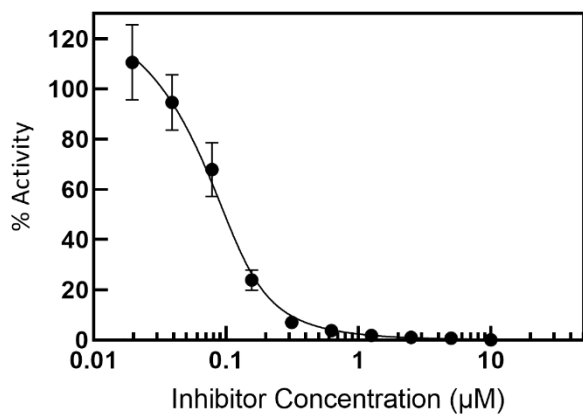

**Figure S2a.** Dose-response curves. **GC376:**  $IC_{50} = 0.11 \pm 0.06$ .

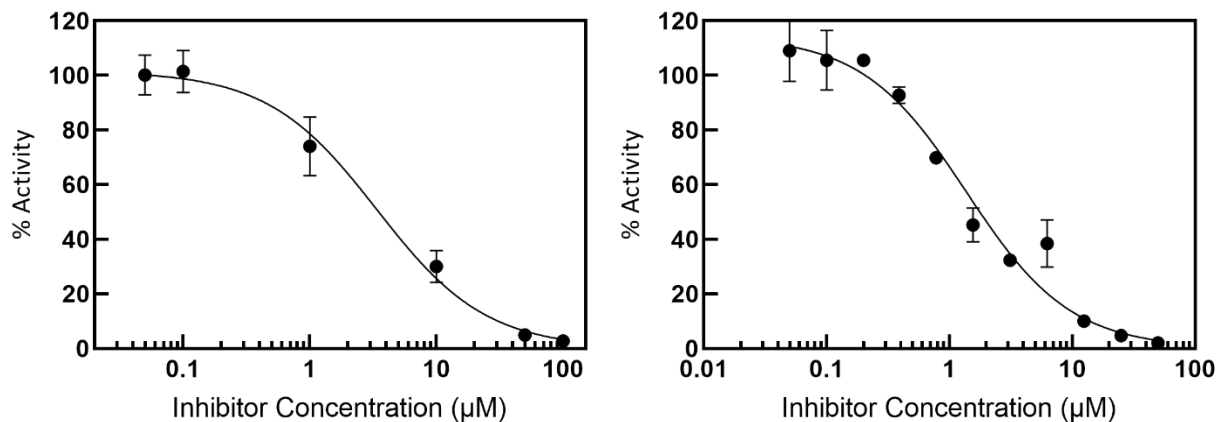

**Figure S2b.** Dose-response curves. Top: **X77:**  $IC_{50} = 4.1 \pm 1$ ; **ML188:**  $IC_{50} = 1.4 \pm 0.4$ .

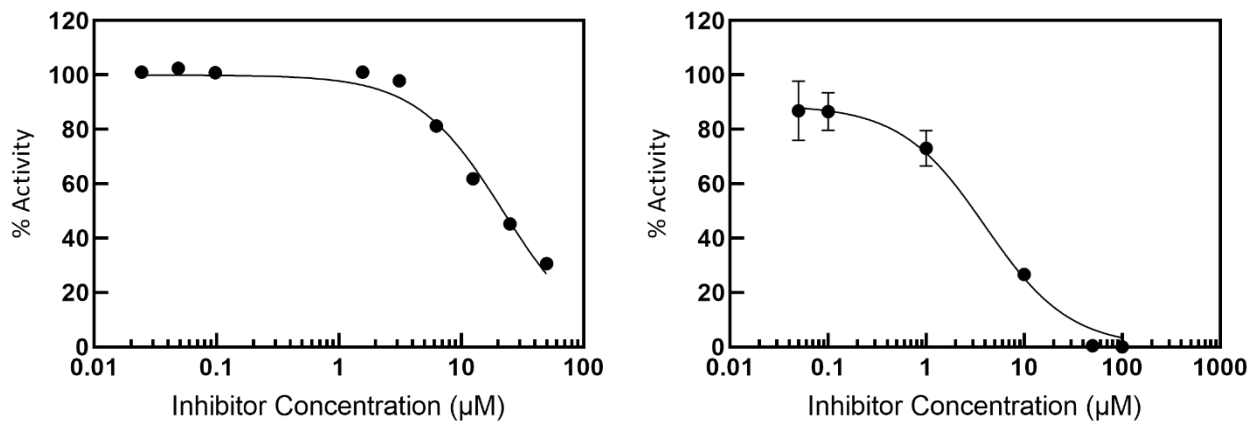

**Figure S2c.** **6a:**  $IC_{50} = 11.1 \pm 1.5$ ; **13a:**  $IC_{50} = 5.3 \pm 0.8$ .

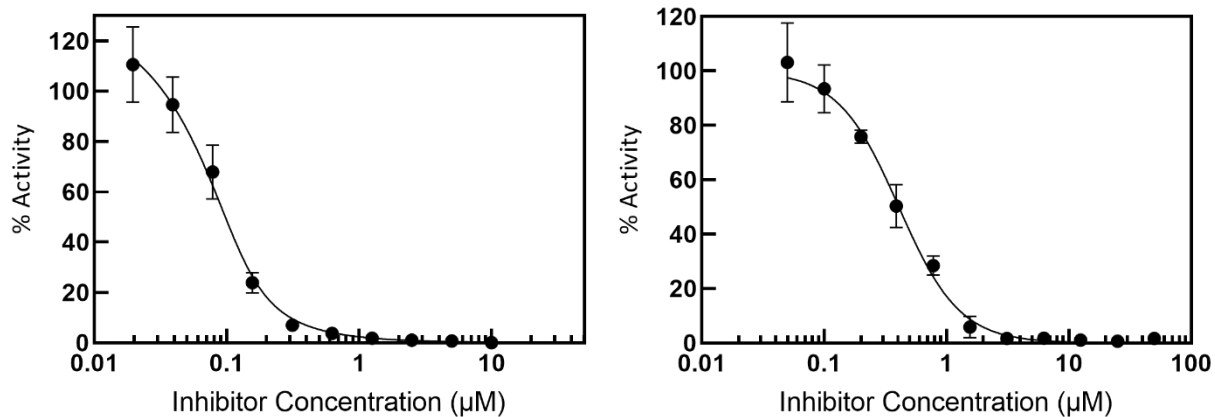

**Figure S2d.** 14a: IC<sub>50</sub> = 0.50 ± 0.1; 16a: IC<sub>50</sub> = 0.40 ± 0.16.

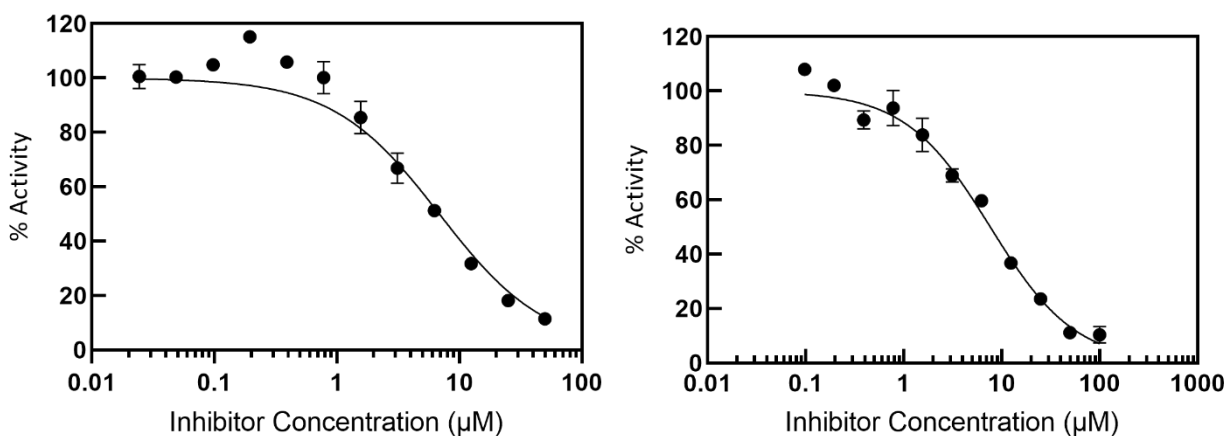

**Figure S2e.** 18a: IC<sub>50</sub> = 5.2 ± 1.2; 20a: IC<sub>50</sub> = 7.0 ± 0.2.

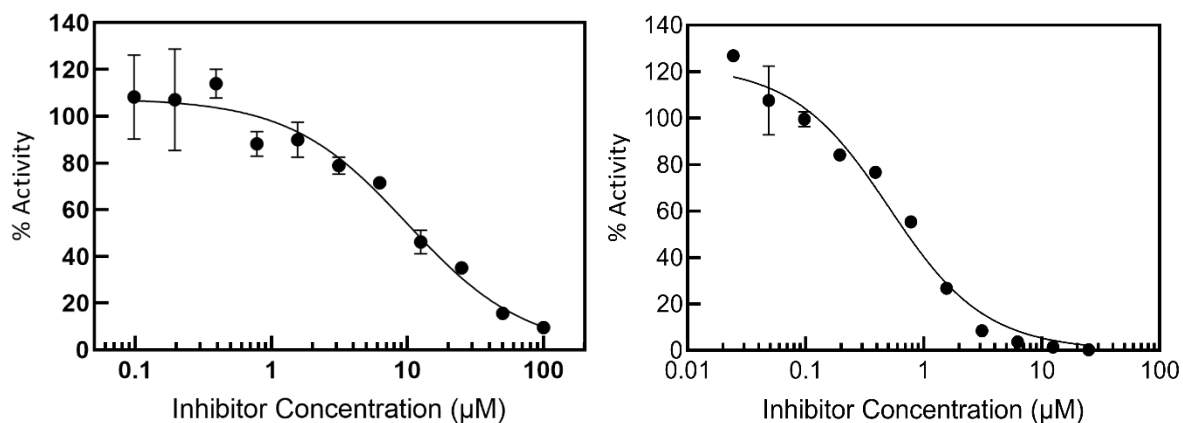

**Figure S2f.** 22a: IC<sub>50</sub> = 12.4 ± 5.2; 23a: IC<sub>50</sub> = 0.85 ± 0.42.



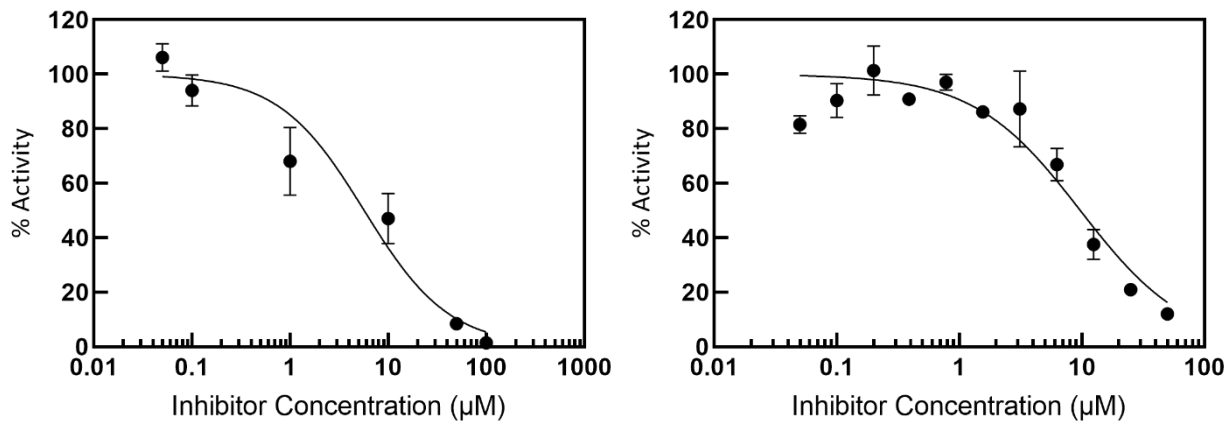

Figure S2g. **13b**: IC<sub>50</sub> = 15.0 ± 9.3; **13c**: IC<sub>50</sub> = 9.7 ± 3.8.

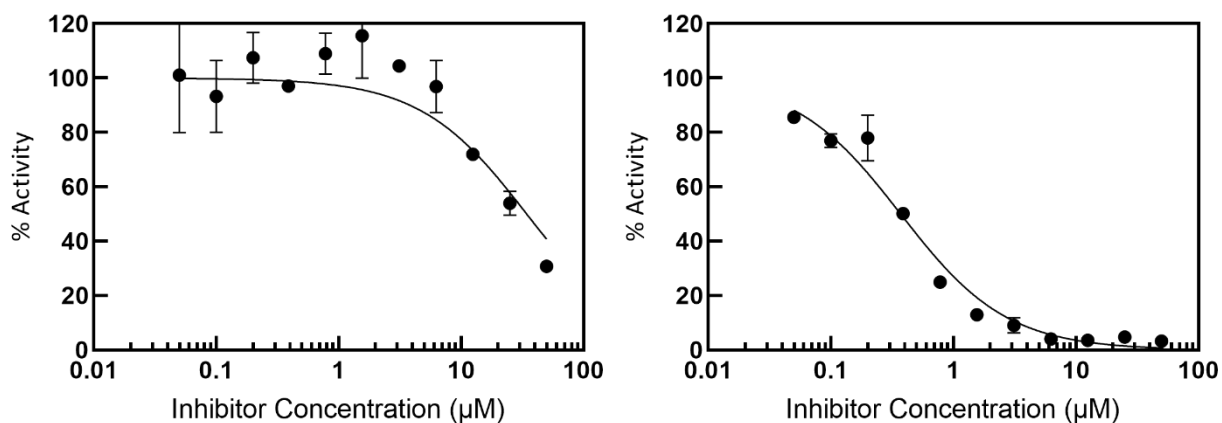

Figure S2h. **13d**: IC<sub>50</sub> > 30; **16b**: IC<sub>50</sub> = 0.38 ± 0.09.

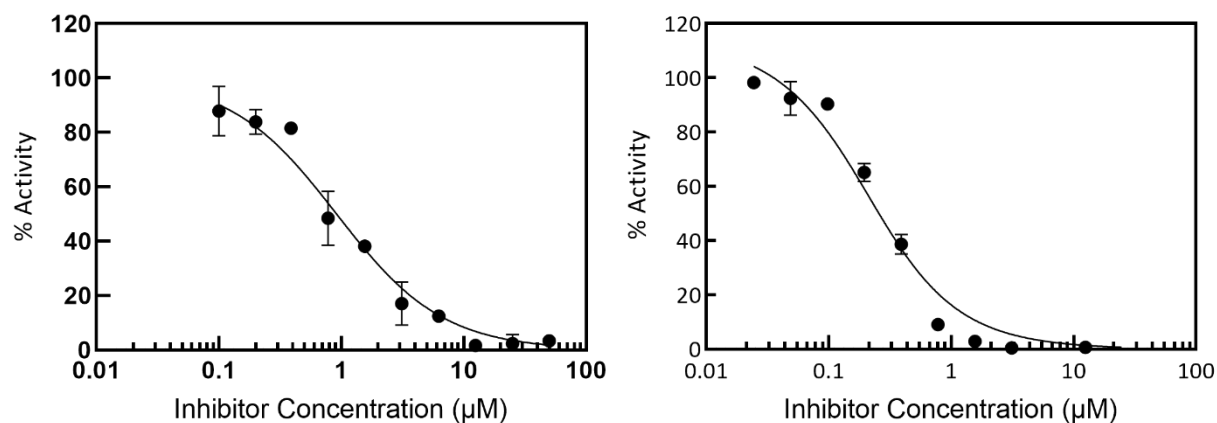

Figure S2i. **16c**: IC<sub>50</sub> = 0.92 ± 0.24; **14b**: IC<sub>50</sub> = 0.28 ± 0.10;

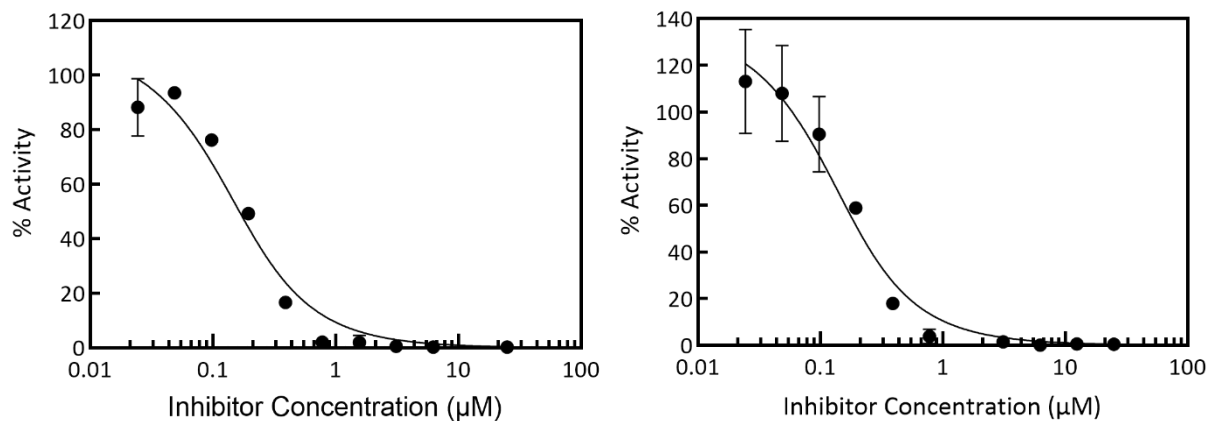

**Figure S2j.** 14c: IC<sub>50</sub> = 0.17 ± 0.07; 14d: IC<sub>50</sub> = 0.24 ± 0.15.

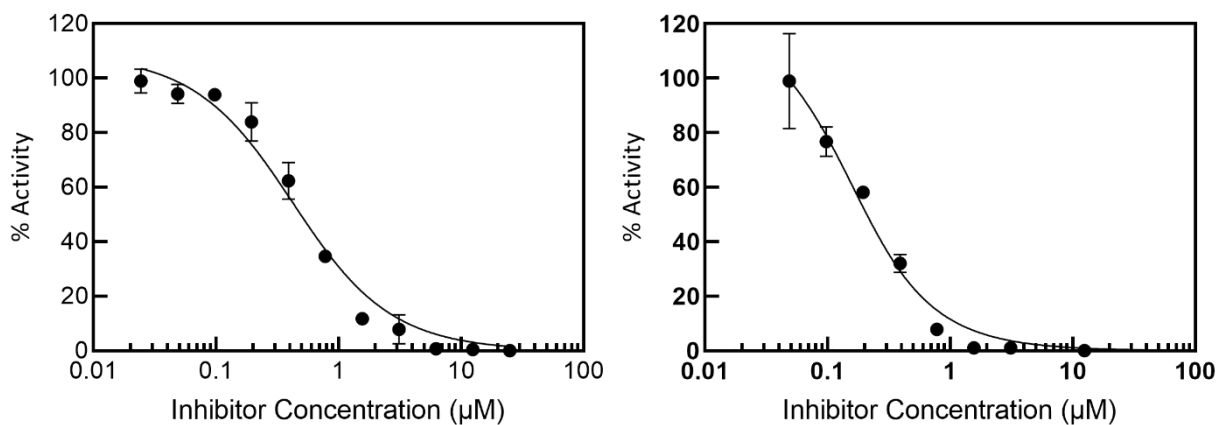

**Figure S2k.** 14e: IC<sub>50</sub> = 0.52 ± 0.16; 14f: IC<sub>50</sub> = 0.22 ± 0.08

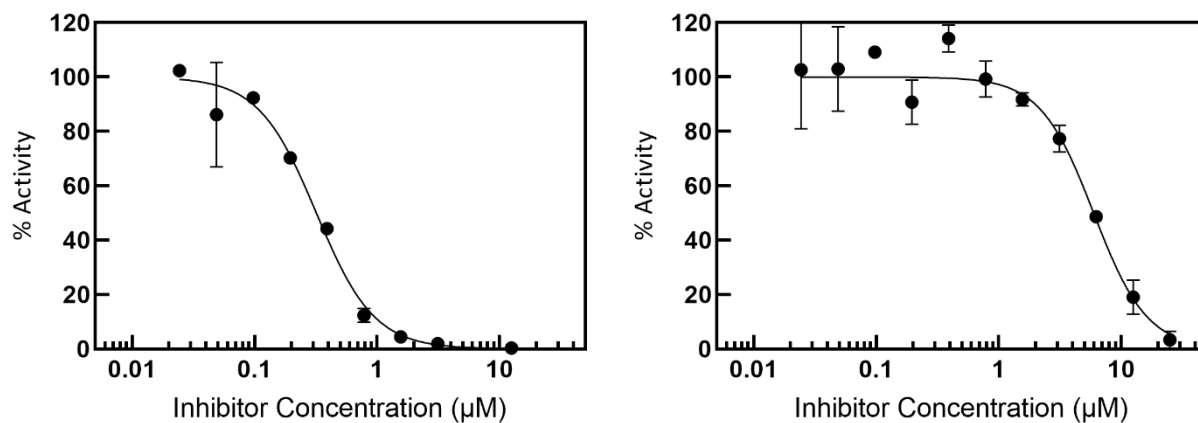

**Figure S2l.** 14g: IC<sub>50</sub> = 0.32 ± 0.10; 14h: IC<sub>50</sub> = 6.0 ± 2.7.

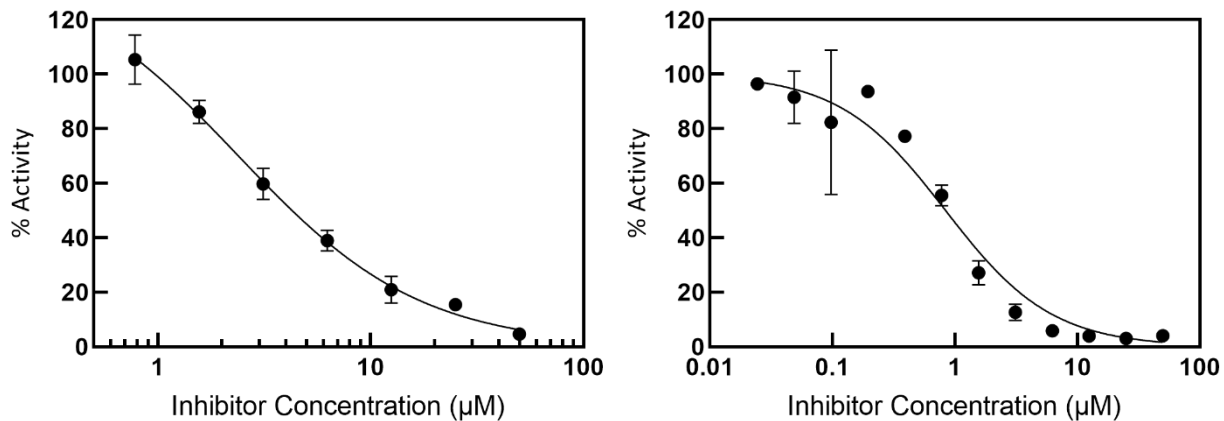

Figure S2m. 13e:  $IC_{50} = 5.0 \pm 2.3$ ; 16e:  $IC_{50} = 0.84 \pm 0.30$ .

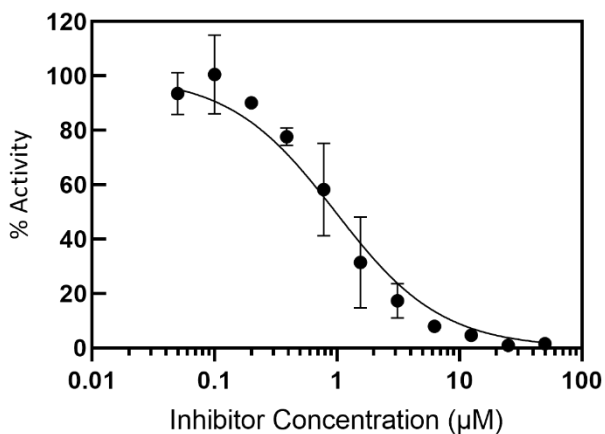

Figure S2m. 16f:  $IC_{50} = 0.98 \pm 0.35$ .

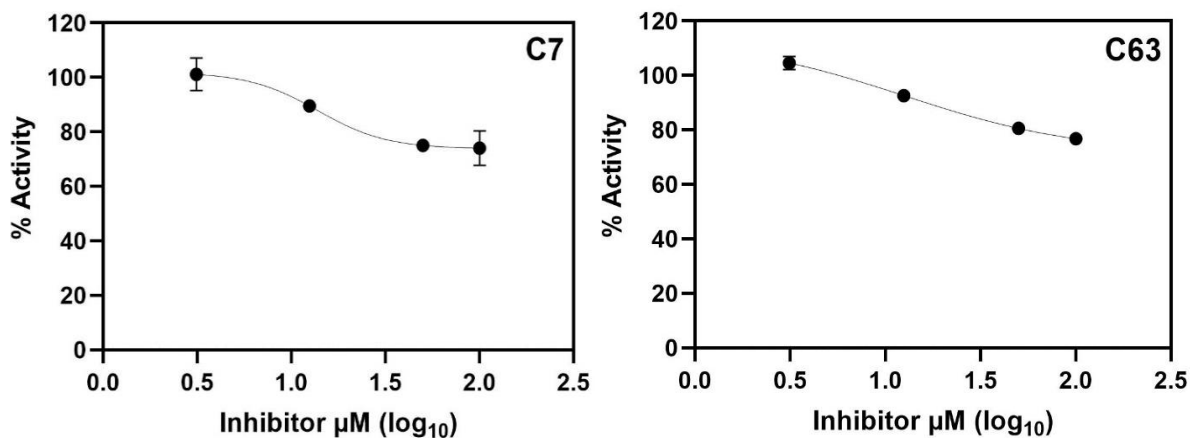

Figure S3a. Cathepsin L inhibition: 16a and 14a.

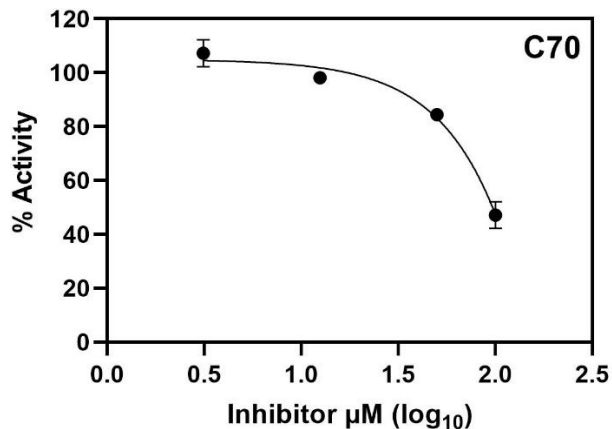

Figure S3b. Cathepsin L inhibition: **14c**.

### 3. Time dependent $\text{IC}_{50}$ 's and Mass Spectrometry

**Covalent binding.** To evaluate the covalent inhibition hypothesis, we measured the time dependence of the inhibition of our most potent inhibitor, **16a**. As can be seen in Figure 6, the level of inhibition increases over time when the inhibitor is used close to its  $\text{IC}_{50}$  concentration, while it remains constant for the non-covalent inhibitor **X77**. This observation is consistent with the slow formation of a covalent adduct. Furthermore, the presence of the 3CL<sup>pro</sup>-**16a** and 3CL<sup>pro</sup>-**14a** adducts were confirmed by LC-MS (Figures S4 and S5). When the protease was incubated with inhibitor **16a**, the population of unmodified protein decreases as a new population with mass of the protease-inhibitor complex (3CL<sup>pro</sup> + **16a**) appears, persists while denaturation occurs.

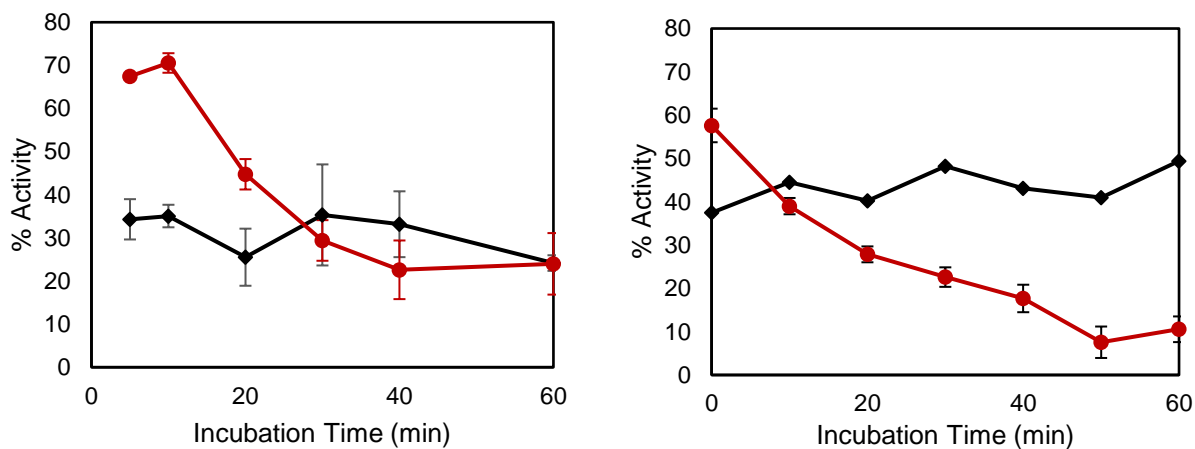

Figure S4. Time-dependent potency for **X77** (black) and **16a** (left, red) and **14a** (right, red).

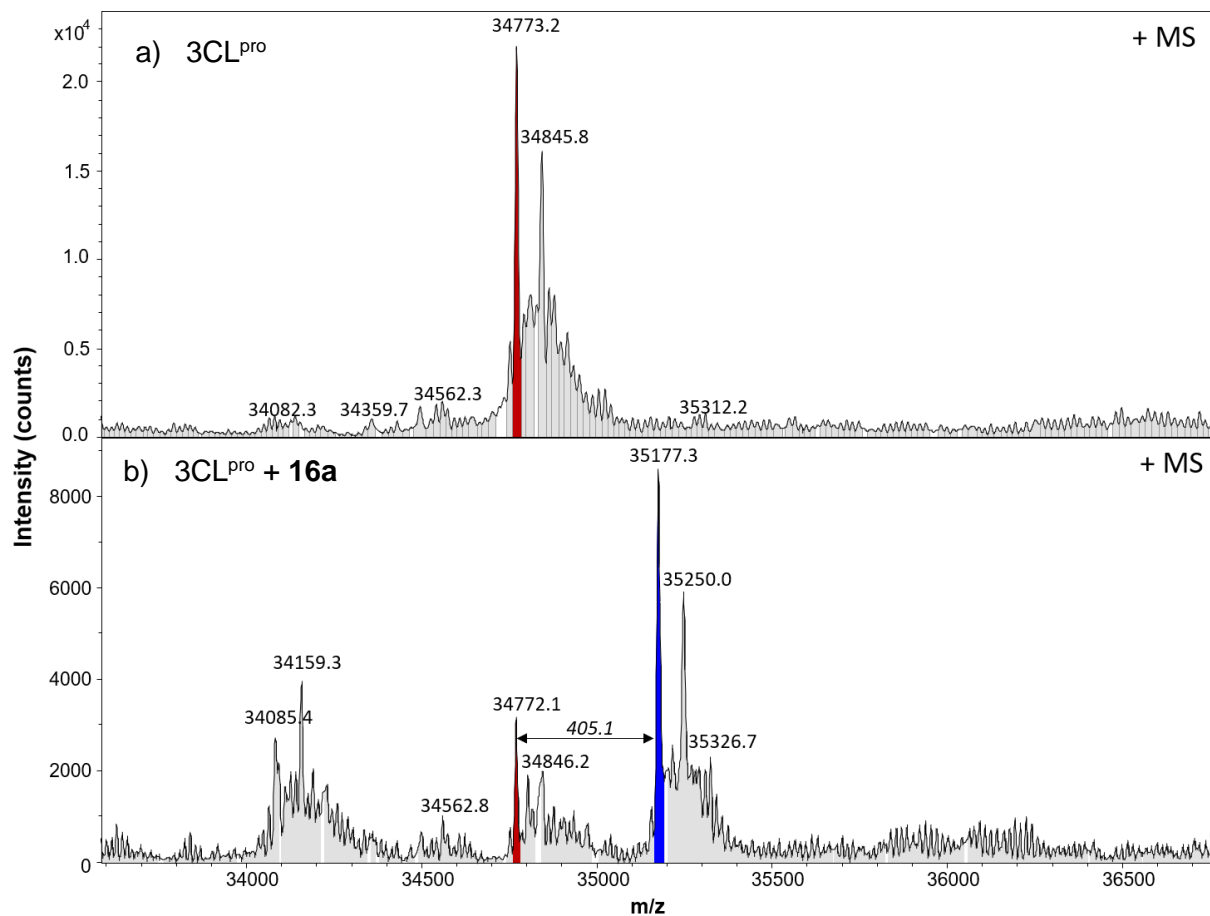

**Figure S5a.** Deconvoluted mass spectra of 3CL<sup>pro</sup> in the absence, a), and presence, b), of **16a**. While the mass of 3CL<sup>pro</sup> (red) is present in both spectra, the mass corresponding to the covalent 3CL<sup>pro</sup>-**16a** adduct (blue) is only observed in the presence of **16a**.

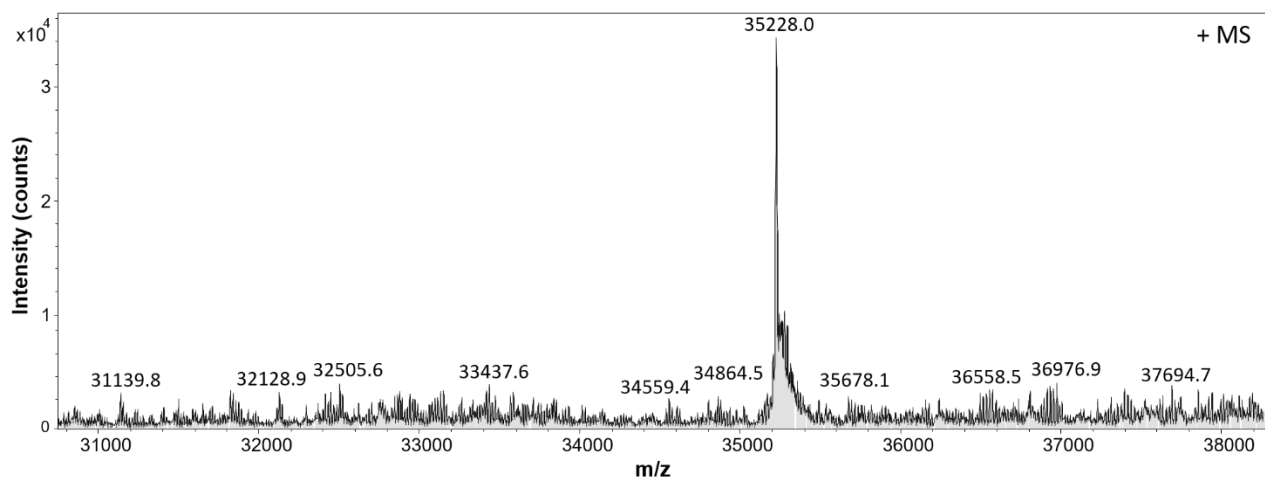

**Figure S5b.** Deconvoluted mass spectrum for 3CL<sup>pro</sup> in the presence of **14a**. The expected mass for 3CL<sup>pro</sup>-**14a** adduct is 35228.

#### 4. Isothermal Titration Calorimetry

**Enzyme Fitting Scripts.** All curve fitting was performed with MATLAB. Differential equations shown below describing Michaelis-Menten kinetics, competitive inhibition, and covalent inhibition were integrated using MATLAB's built in ODE solver ode15s.

Michaelis-Menten Kinetics

$$[E]_{inj} = [E]_{cell} + \frac{V_{inj}[E]_{syringe}}{V_{cell}}$$

$$\frac{d[S]}{dt} = -\frac{(k_{cat}[E]_{inj}[S]_t)}{K_m + [S]_t}$$

$$\frac{d[P]}{dt} = \frac{(k_{cat}[E]_{inj}[S]_t)}{K_m + [S]_t}$$

Rapid equilibrium inhibition

$$[E]_{inj} = [E]_{cell} + \frac{V_{inj}[E]_{syringe}}{V_{cell}}$$

$$K_{m(app)} = K_m * \left(1 + \frac{[I]}{K_i}\right)$$

$$\frac{d[S]}{dt} = -\frac{(k_{cat}[E]_{inj}[S]_t)}{K_{m(app)} + [S]_t}$$

$$\frac{d[P]}{dt} = \frac{(k_{cat}[E]_{inj}[S]_t)}{K_{m(app)} + [S]_t}$$

Irreversible inhibition

$$[E]_{inj} = [E]_{cell} + \frac{V_{inj}[E]_{syringe}}{V_{cell}}$$

$$\frac{d[S]}{dt} = -\frac{(k_{cat}[E]_{inj}[S]_t)}{K_{m(app)} + [S]_t}$$

$$\frac{d[P]}{dt} = \frac{(k_{cat}[E]_{inj}[S]_t)}{K_{m(app)} + [S]_t}$$

$$[E]_{free} = [E]_{inj} * \left(1 - \frac{[S]_t}{[S]_t + K_m}\right)$$

$$\frac{d[E]_{inj}}{dt} = -k_{on}[I][E]_{free}$$

## Pre-equilibrium irreversible inhibition

$$\begin{aligned}
[E]_{inj} &= [E]_{cell} + \frac{V_{inj}[E]_{syringe}}{V_{cell}} \\
[ES]_t &= \frac{K_i[S]_t[E]_{inj}}{K_m K_i + K_i[S]_t + K_m[I]} \\
[EI]_t &= \frac{K_i[I]_t[ES]_t}{K_i[S]_t} \\
\frac{d[S]}{dt} &= -\frac{(k_{inact}[E]_{inj}[S]_t)}{K_m + [S]_t} \\
\frac{d[P]}{dt} &= \frac{(k_{inact}[E]_{inj}[S]_t)}{K_m + [S]_t} \\
\frac{d[E]_{inj}}{dt} &= -k_{inact}[EI]
\end{aligned}$$

where  $k_{cat}$  and  $K_m$  are the catalytic rate and the Michaelis constant respectively, and  $[E]_t$ ,  $[S]_t$ , and  $[P]_t$  are the total concentrations of enzyme, substrate, and product at time =  $t$ .  $[E]_{cell}$  and  $[E]_{syringe}$  are the concentrations of enzyme in the cell and syringe respectively.  $V_{inj}$  and  $V_{cell}$  are the volume of each injection and total volume of the cell respectively. The instantaneous heat  $h(t)$  is calculated from the enthalpy of the reaction,  $dH_{react}$ , and the total volume of the cell according to

$$h(t) = \Delta H_{cat} * V_{cell} * \frac{d[P]}{dt}$$

to account for injection artifacts, only the last half of each injection was used for fitting. Furthermore, a linear baseline was fit to account for any baseline drift during the experiment. Enzyme kinetic parameters were globally fit to both data sets by minimizing the target function

$$RSS = \sum_{n=0}^N [h(t) - \Delta P(t)]^2$$

where the RSS is the residual sum of squared differences and  $\Delta P(t)$  is the change in experimental heat from the baseline. Errors for fitted parameters were calculated using a bootstrapping approach, in which each bootstrap sample was obtained by random resampling of the original data. For example, if the original dataset contained  $N$  points, each bootstrap sample was constructed by randomly selecting  $N$  of these data points, such that points may be selected more than once or not at all. 500 bootstrap samples were constructed and fitted using the thermodynamic models described above. The errors in the extracted parameters were taken as the standard deviations of the 500 sets of parameters obtained for all bootstrap samples.<sup>1</sup>

**Table S1:** Best fit kinetic parameters

| 3CL <sup>pro</sup> | $k_{cat}$<br>( $s^{-1}$ ) |       | $K_m$<br>( $\mu M$ )                |       | $\Delta H$<br>( $kcal/mol$ ) |                      | $RSS$ |  |
|--------------------|---------------------------|-------|-------------------------------------|-------|------------------------------|----------------------|-------|--|
|                    | 2.9 ± 0.2                 |       | 80 ± 10                             |       | -1.91 ± 0.06                 |                      | 0.70  |  |
|                    | Pre-equilibrium           |       | Irreversible                        |       | Pre-equilibrium Reversible   |                      |       |  |
|                    | $K_i$<br>( $nM$ )         | $RSS$ | $k_{on}$<br>( $\mu M^{-1} s^{-1}$ ) | $RSS$ | $k_{inact}$<br>( $s^{-1}$ )  | $K_i$<br>( $\mu M$ ) | $RSS$ |  |
| <b>16a</b>         | 1.0e5 ± 1e4               | 0.40  | 3.9e2 ± 0.5e2                       | 1.1   | 3e-3 ± 1e-3                  | 16 ± 2               | 0.20  |  |
| <b>14a</b>         | 870 ± 80                  | 4.09  | 1.7e3 ± 0.3                         | 1.55  | 6.1e-3 ± 0.5e-3              | 4.5 ± 0.3            | 0.19  |  |
| <b>14c</b>         | 35 ± 9                    | 2.75  | 6.1e3 ± 0.9e3                       | 2.11  | 1.7e-2 ± 0.2e-2              | 2.3 ± 0.3            | 2.00  |  |

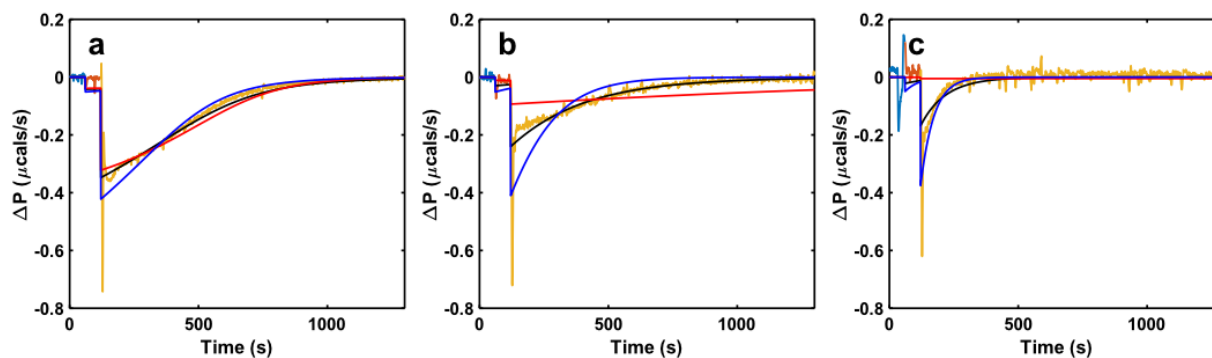

**Figure S6.** ITC enzyme activity assay in the presence of a) **16a**, b) **14a**, c) **14c**, each successive injection is shown in separate color, ITC simulations corresponding to the minimized kinetic parameters for a pre-equilibrium inhibition are shown in red, irreversible inhibition are shown as blue, and pre-equilibrium irreversible inhibition is shown in black.



## 5. Crystallography

**Table S2.** Statistics for crystallography data and structure refinement.

|                                | <b>3CL<sup>pro</sup> – 16a</b>     | <b>3CL<sup>pro</sup> – 14a</b>         |
|--------------------------------|------------------------------------|----------------------------------------|
| Wavelength (Å)                 | 1.521                              | 0.97918                                |
| Resolution range               | 38.38 - 2.6 (2.693 - 2.6)          | 48.06 - 2.5 (2.59 - 2.5)               |
| Space group                    | C 1 2 1                            | C 1 2 1                                |
| Unit cell                      | 116.81 53.54 45.33 90<br>98.917 90 | 113.45 53.318 45.4745<br>90 101.876 90 |
| Total reflections              | 16512 (1645)                       | 17032 (1708)                           |
| Unique reflections             | 8544 (862)                         | 9105 (901)                             |
| Multiplicity                   | 1.9 (1.9)                          | 2.9 (3.1)                              |
| Completeness (%)               | 93.18 (48.82)                      | 97.59 (98.79)                          |
| Mean I/sigma(I)                | 6.00 (0.45)                        | 9.37 (1.14)                            |
| Wilson B-factor                | 71.23                              | 54.62                                  |
| R-merge                        | 0.04975 (1.3)                      | 0.03943 (0.2481)                       |
| R-meas                         | 0.07036 (1.838)                    | 0.05576 (0.3509)                       |
| R-pim                          | 0.04975 (1.3)                      | 0.03943 (0.2481)                       |
| CC1/2                          | 0.996 (0.679)                      | 0.997 (0.777)                          |
| CC*                            | 0.999 (0.899)                      | 0.999 (0.935)                          |
| Reflections used in refinement | 8072 (435)                         | 9104 (901)                             |
| Reflections used for R-free    | 417 (20)                           | 434 (40)                               |
| R-work                         | 0.2146                             | 0.2242 (0.3611)                        |
| R-free                         | 0.2677                             | 0.2680 (0.3928)                        |
| Number of non-hydrogen atoms   | 2417                               | 2407                                   |
| macromolecules                 | 2347                               | 2347                                   |
| ligands                        | 30                                 | 32                                     |
| solvent                        | 40                                 | 28                                     |
| Protein residues               | 304                                | 304                                    |
| RMS(bonds)                     | 0.013                              | 0.012                                  |
| RMS(angles)                    | 1.67                               | 1.65                                   |
| Ramachandran favored (%)       | 96.36                              | 96.36                                  |
| Ramachandran allowed (%)       | 3.31                               | 3.64                                   |
| Ramachandran outliers (%)      | 0.33                               | 0                                      |
| Rotamer outliers (%)           | 0                                  | 0.38                                   |
| Clashscore                     | 1.5                                | 3.83                                   |
| Average B-factor               | 65.04                              | 63.73                                  |
| macromolecules                 | 65.15                              | 63.38                                  |
| ligands                        | 79.53                              | 107.2                                  |
| solvent                        | 47.9                               | 43.37                                  |

## 6. Additional figures

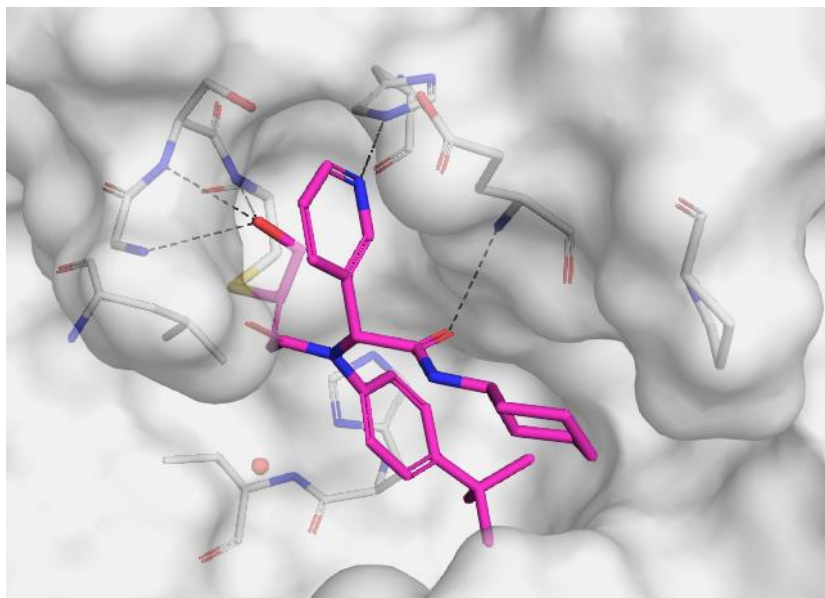

**Figure S7.** Docked molecule **13a** to 3CL<sup>pro</sup> catalytic site.

## 7. Compound purity

**Table S3.** Purity of Biologically Tested Compounds

| Entry | Compound     | Retention time (min.) <sup>a</sup> | Purity (%) <sup>b</sup> |
|-------|--------------|------------------------------------|-------------------------|
| 1     | <b>X77</b>   | 15.45                              | 99.1                    |
| 2     | <b>ML188</b> | 15.09                              | 98.9                    |
| 3     | <b>4a</b>    | 14.52                              | 95.6                    |
| 4     | <b>4b</b>    | 13.99                              | 97.8                    |
| 5     | <b>5a</b>    | 15.77                              | 96.7                    |
| 6     | <b>6a</b>    | 15.18                              | 98.9                    |
| 7     | <b>6b</b>    | 14.72                              | 99.6                    |
| 8     | <b>7a</b>    | 16.59                              | 97.6                    |
| 9     | <b>8a</b>    | 15.53                              | 99.8                    |
| 10    | <b>8b</b>    | 14.89                              | 99.8                    |
| 11    | <b>8c</b>    | 15.10                              | 97.5                    |
| 12    | <b>9a</b>    | 15.56                              | 96.4                    |
| 13    | <b>10a</b>   | 15.34                              | 95.2                    |
| 14    | <b>11a</b>   | 16.06                              | 95.1                    |
| 15    | <b>11b</b>   | 15.77                              | 97.1                    |

|    |            |       |       |
|----|------------|-------|-------|
| 16 | <b>11c</b> | 17.45 | 95.1  |
| 17 | <b>11d</b> | 17.03 | 98.37 |
| 18 | <b>11e</b> | 15.54 | 95.7  |
| 19 | <b>11f</b> | 16.17 | 95.7  |
| 20 | <b>11g</b> | 16.04 | 96.4  |
| 21 | <b>11h</b> | 16.93 | 99.5  |
| 22 | <b>11i</b> | 14.50 | 98.3  |
| 23 | <b>12a</b> | 16.37 | 94.0  |
| 24 | <b>13a</b> | 15.25 | 94.2  |
| 25 | <b>13b</b> | 14.69 | 97.2  |
| 26 | <b>13c</b> | 15.1  | 96.0  |
| 27 | <b>13d</b> | 14.53 | 97.5  |
| 28 | <b>13e</b> | 16.80 | 99.5  |
| 29 | <b>13f</b> | 16.30 | 95.1  |
| 30 | <b>13g</b> | 15.56 | 95.7  |
| 31 | <b>13h</b> | 17.41 | 91.8  |
| 32 | <b>13i</b> | 14.61 | 99.5  |
| 33 | <b>13j</b> | 14.84 | 97.6  |
| 34 | <b>13k</b> | 14.01 | 97.5  |
| 35 | <b>13l</b> | 15.46 | 99.0  |
| 36 | <b>13m</b> | 12.96 | 92.3  |
| 37 | <b>13n</b> | 15.88 | 96.1  |
| 38 | <b>13o</b> | 15.67 | 95.8  |
| 39 | <b>13p</b> | 14.52 | 98.0  |
| 40 | <b>13q</b> | 14.07 | 95.9  |
| 41 | <b>14a</b> | 15.76 | 91.0  |
| 42 | <b>14b</b> | 15.39 | 99.4  |
| 43 | <b>14c</b> | 15.93 | 97.4  |
| 44 | <b>14d</b> | 15.45 | 99.2  |
| 45 | <b>14e</b> | 15.84 | 94.5  |
| 46 | <b>14f</b> | 11.6  | 87.8  |
| 47 | <b>14g</b> | 15.58 | 92.7  |
| 48 | <b>14h</b> | 15.42 | 95.3  |
| 49 | <b>15a</b> | 15.03 | 94.7  |

|    |            |        |      |
|----|------------|--------|------|
| 50 | <b>16a</b> | 15.37  | 95.6 |
| 51 | <b>16b</b> | 12.80  | 96.1 |
| 52 | <b>16c</b> | 15.3   | 91.2 |
| 53 | <b>16d</b> | 15.52  | 93.5 |
| 54 | <b>16e</b> | 15.46  | 95.4 |
| 55 | <b>16f</b> | 15.84  | 90.6 |
| 56 | <b>17a</b> | 16.00  | 99.5 |
| 57 | <b>18a</b> | 15.34  | 97.7 |
| 58 | <b>18b</b> | 14.224 | 76.6 |
| 59 | <b>19a</b> | 15.80  | 99.8 |
| 60 | <b>20a</b> | 15.08  | 90.9 |
| 61 | <b>21a</b> | 15.71  | 98.5 |
| 62 | <b>22a</b> | 15.32  | 97.7 |
| 63 | <b>23a</b> | 14.52  | 98.2 |
| 64 | <b>24a</b> | 11.99  | 96.7 |
| 65 | <b>25a</b> | 12.05  | 93.1 |

<sup>a</sup> Conditions: (gradient of 95% water, 5% MeOH or MeCN, 1 mL/min). <sup>b</sup> UV detection at 254 nm.

## 8. <sup>1</sup>H and <sup>13</sup>C NMR spectra

### 1. Compound X77 <sup>1</sup>H NMR

JEV-1-Frit-MeOD.1.fid

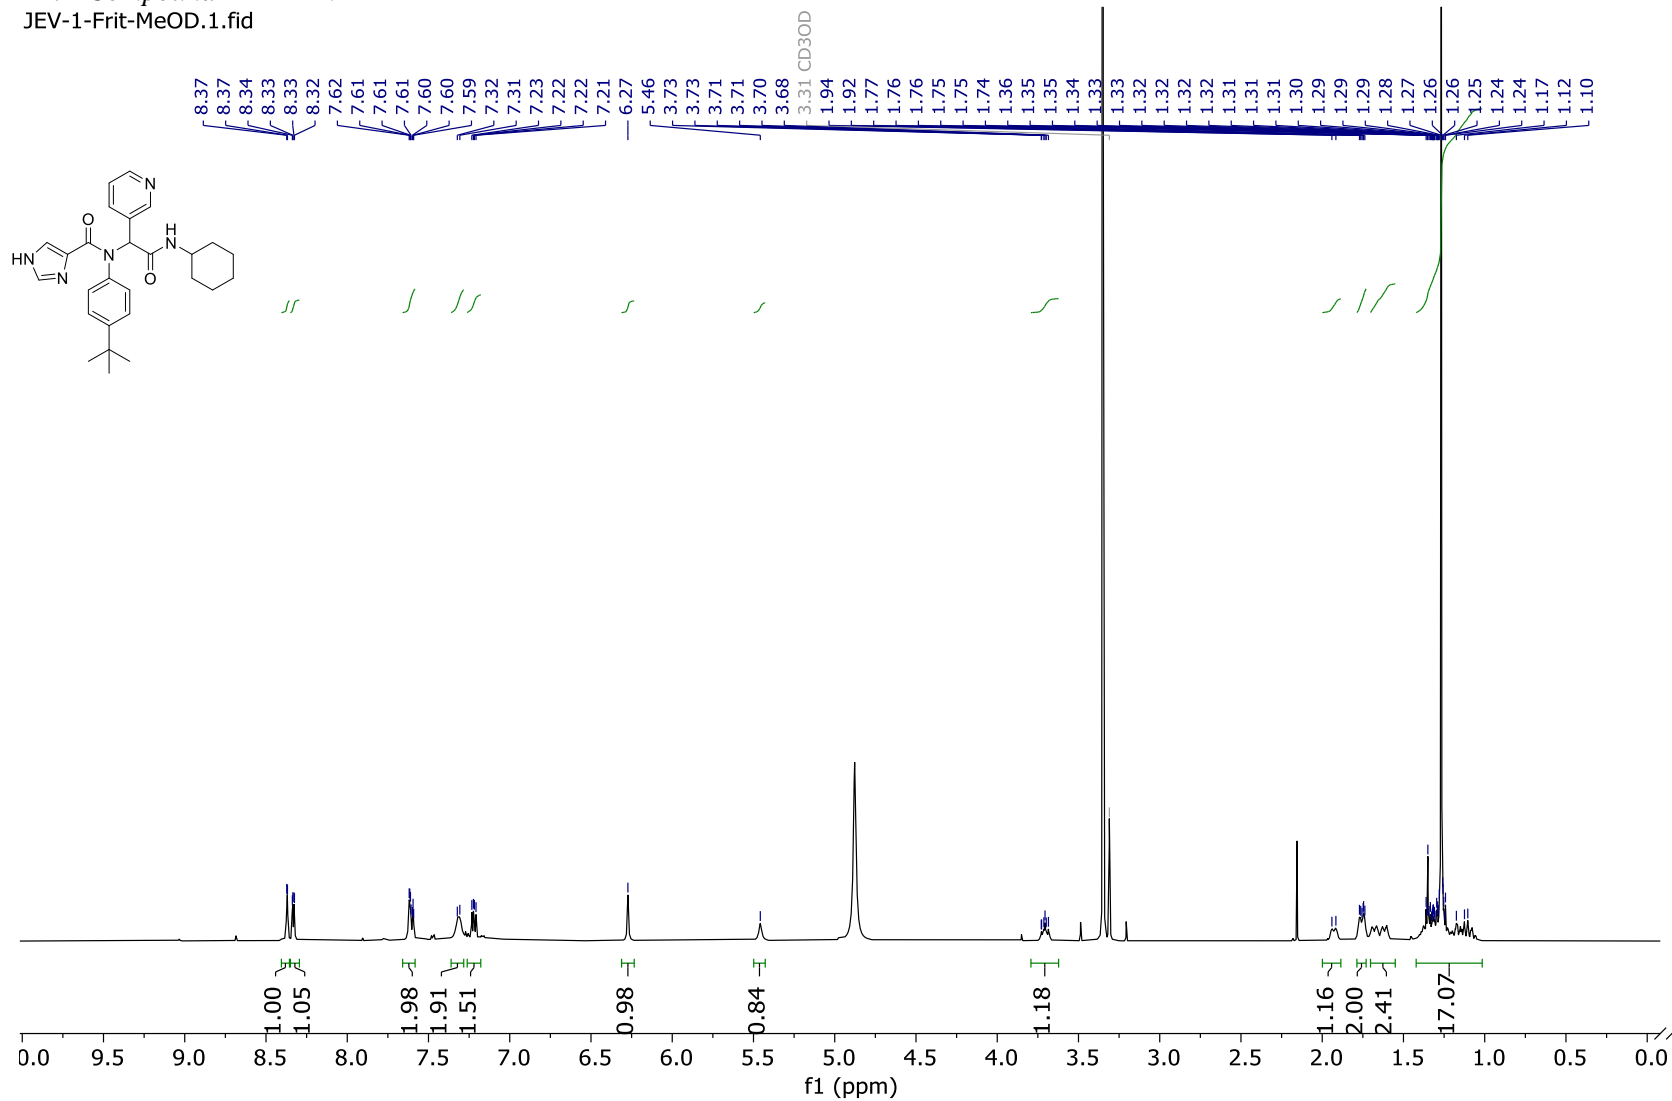

## 2. Compound X77 <sup>13</sup>C NMR

JEV-1-Frit-MeOD.2.fid

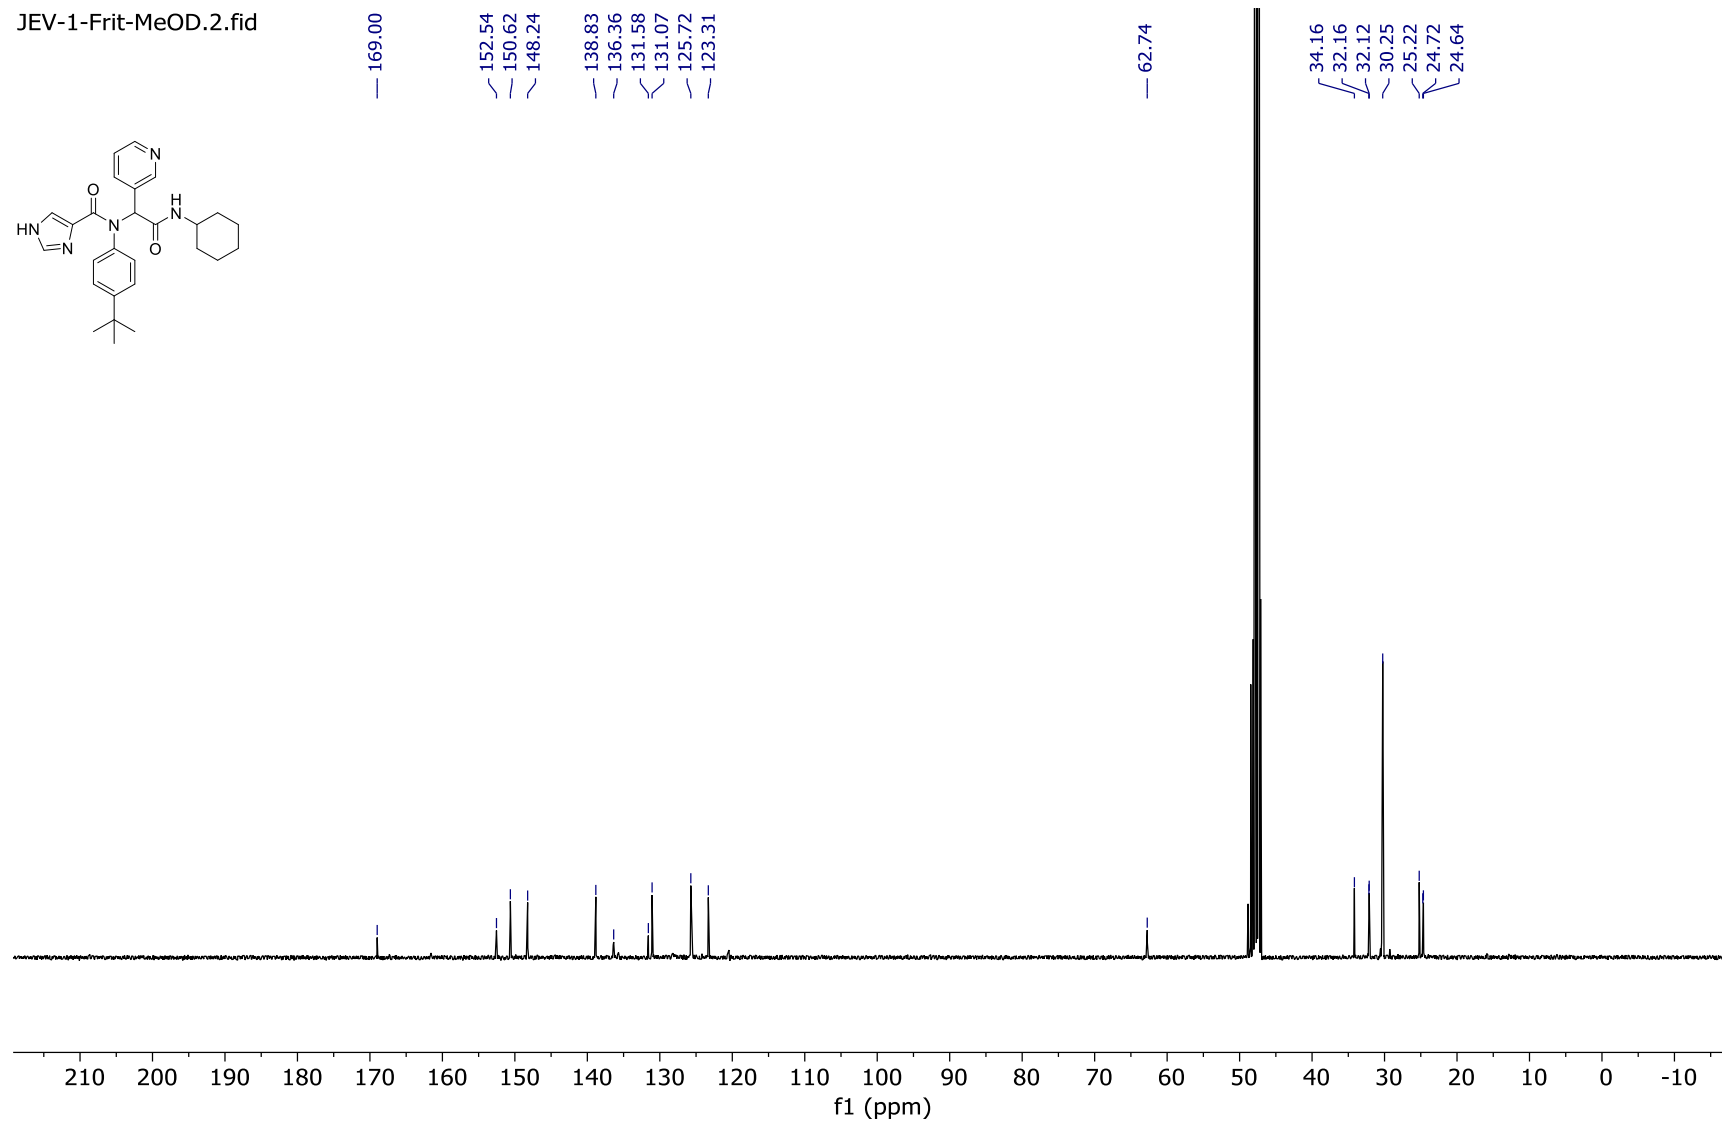

### 3. Compound **ML188** <sup>1</sup>H NMR

JT-52.10.fid

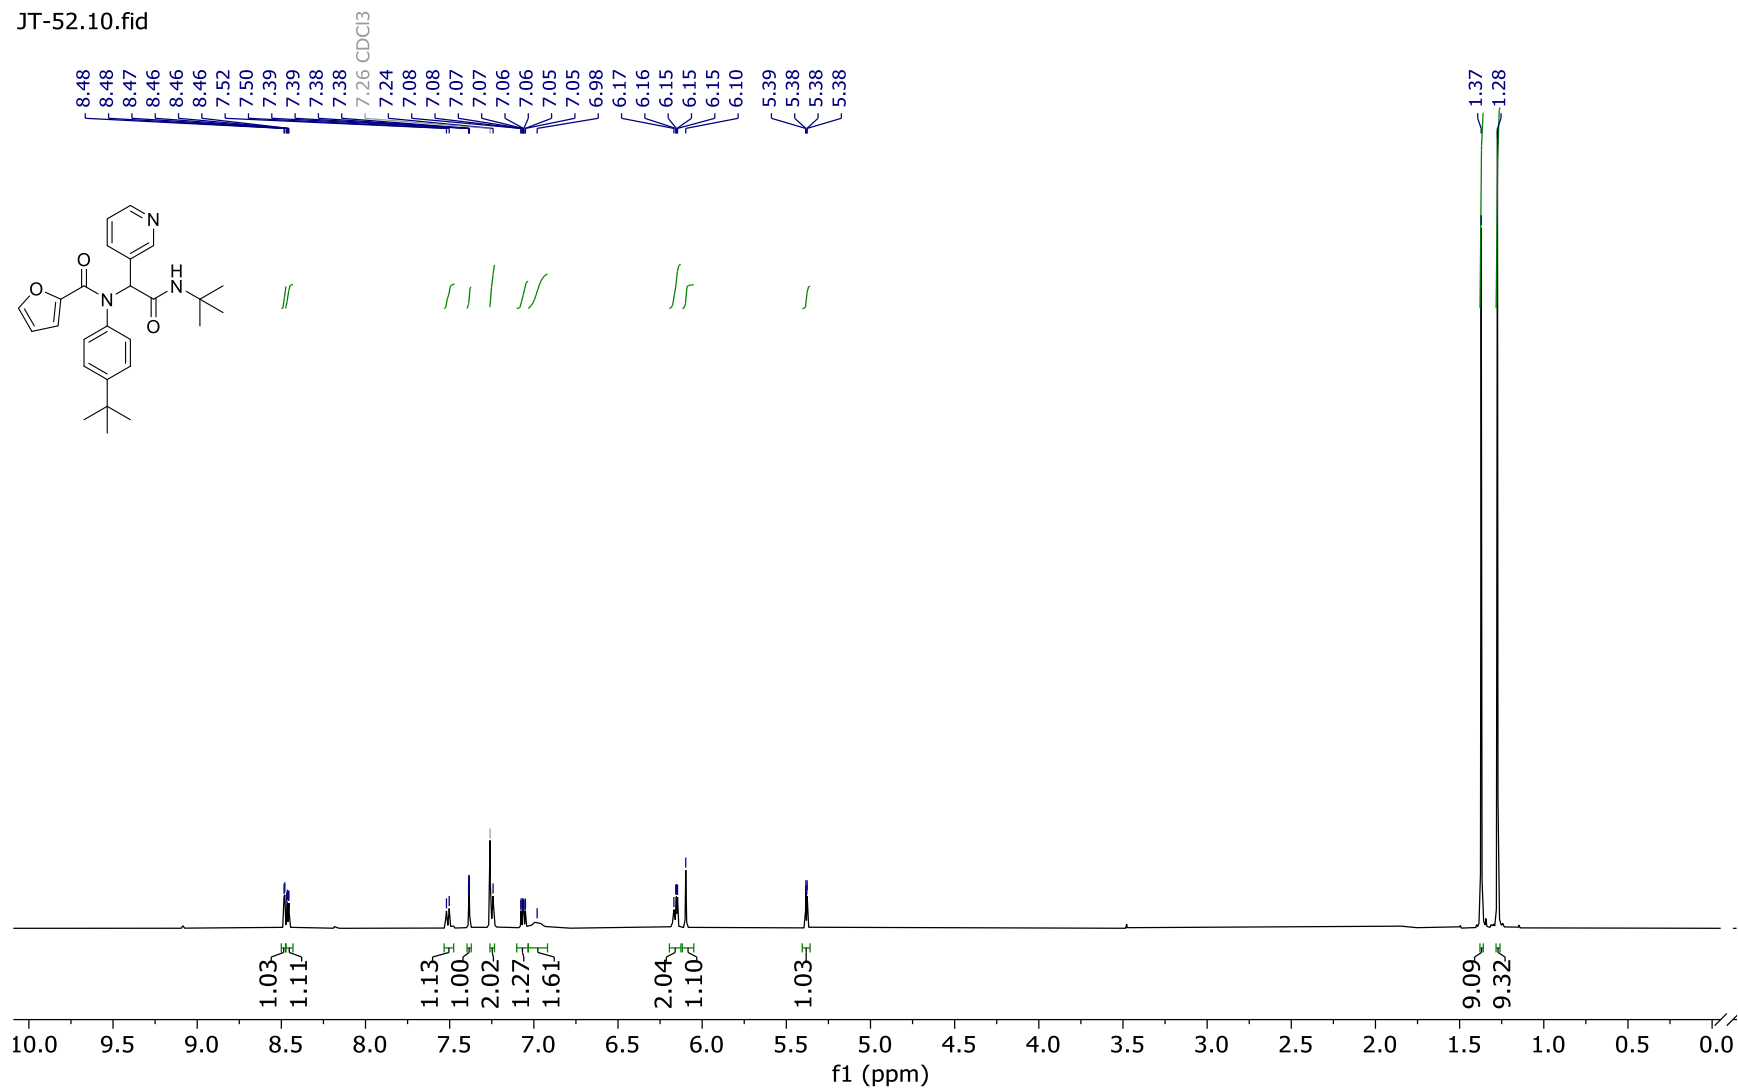

#### 4. Compound **ML188** <sup>13</sup>C NMR

JT-52.11.fid

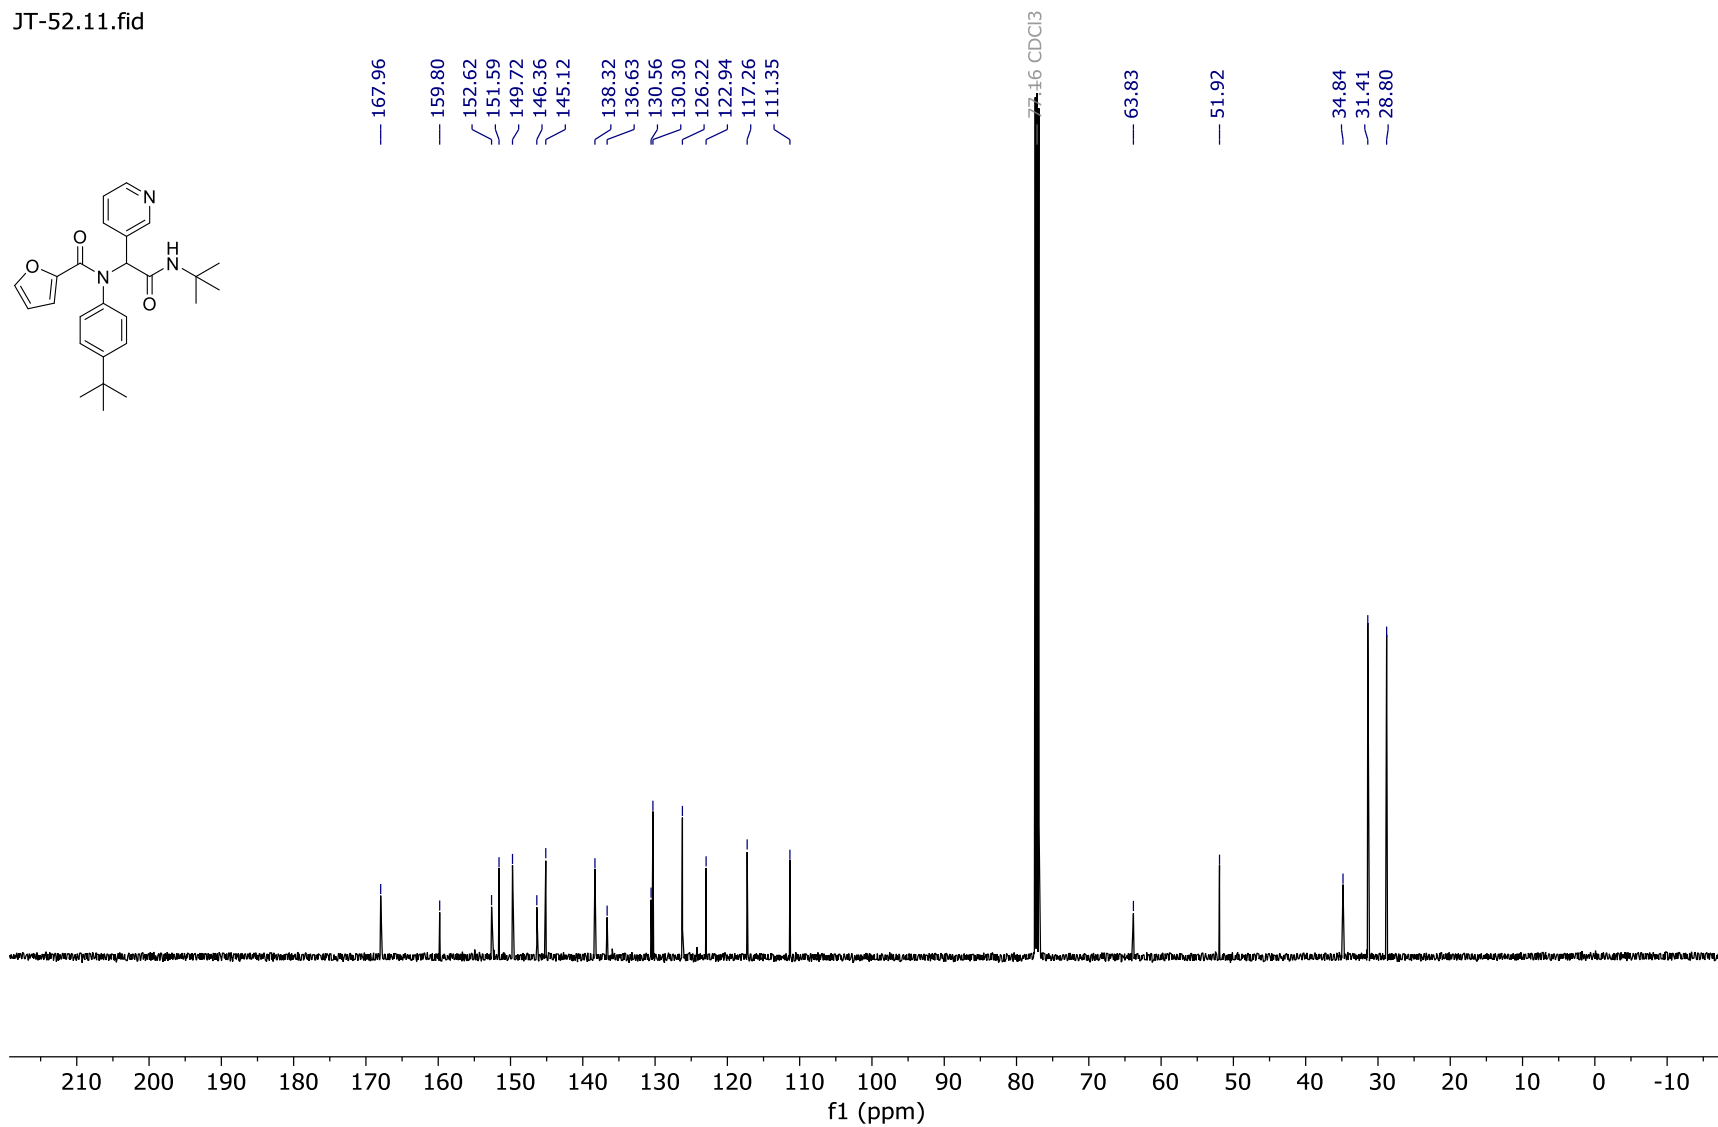



### 5. Compound **4a** <sup>1</sup>H NMR

JT-29.2.fid

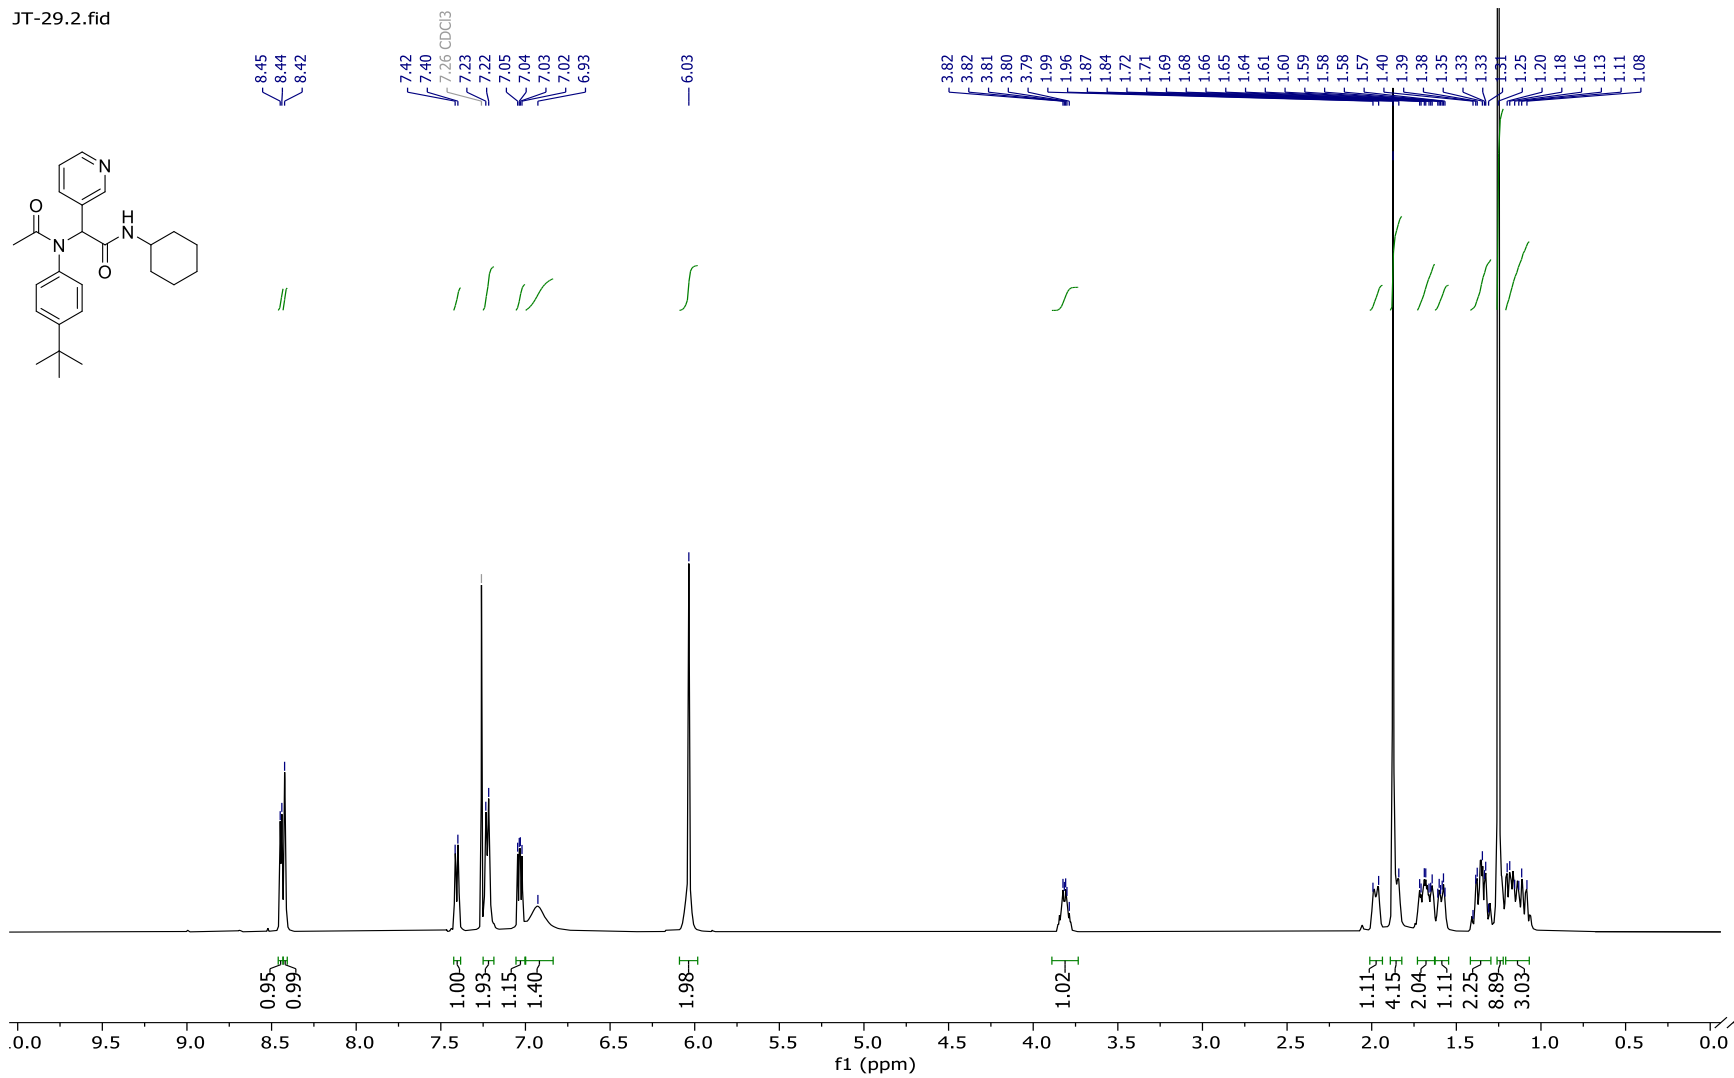

6. Compound **4a** <sup>13</sup>C NMR

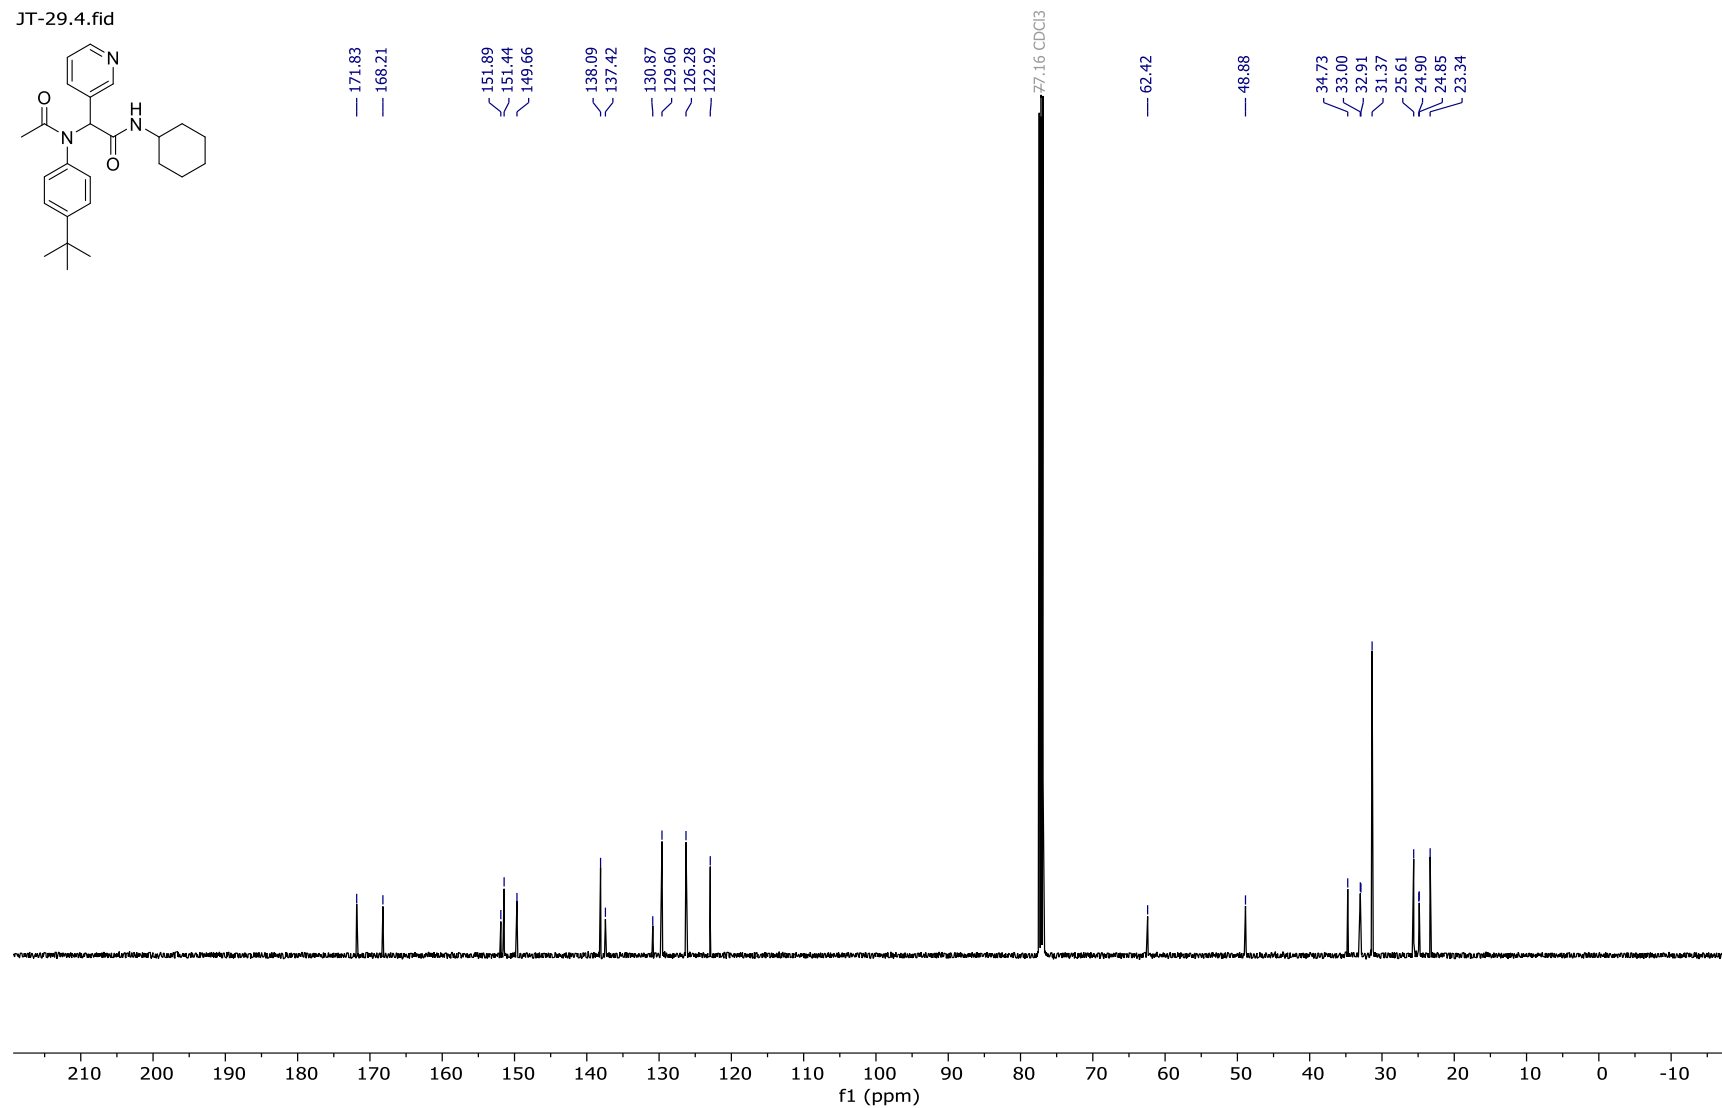

7. Compound **4b** <sup>1</sup>H NMR

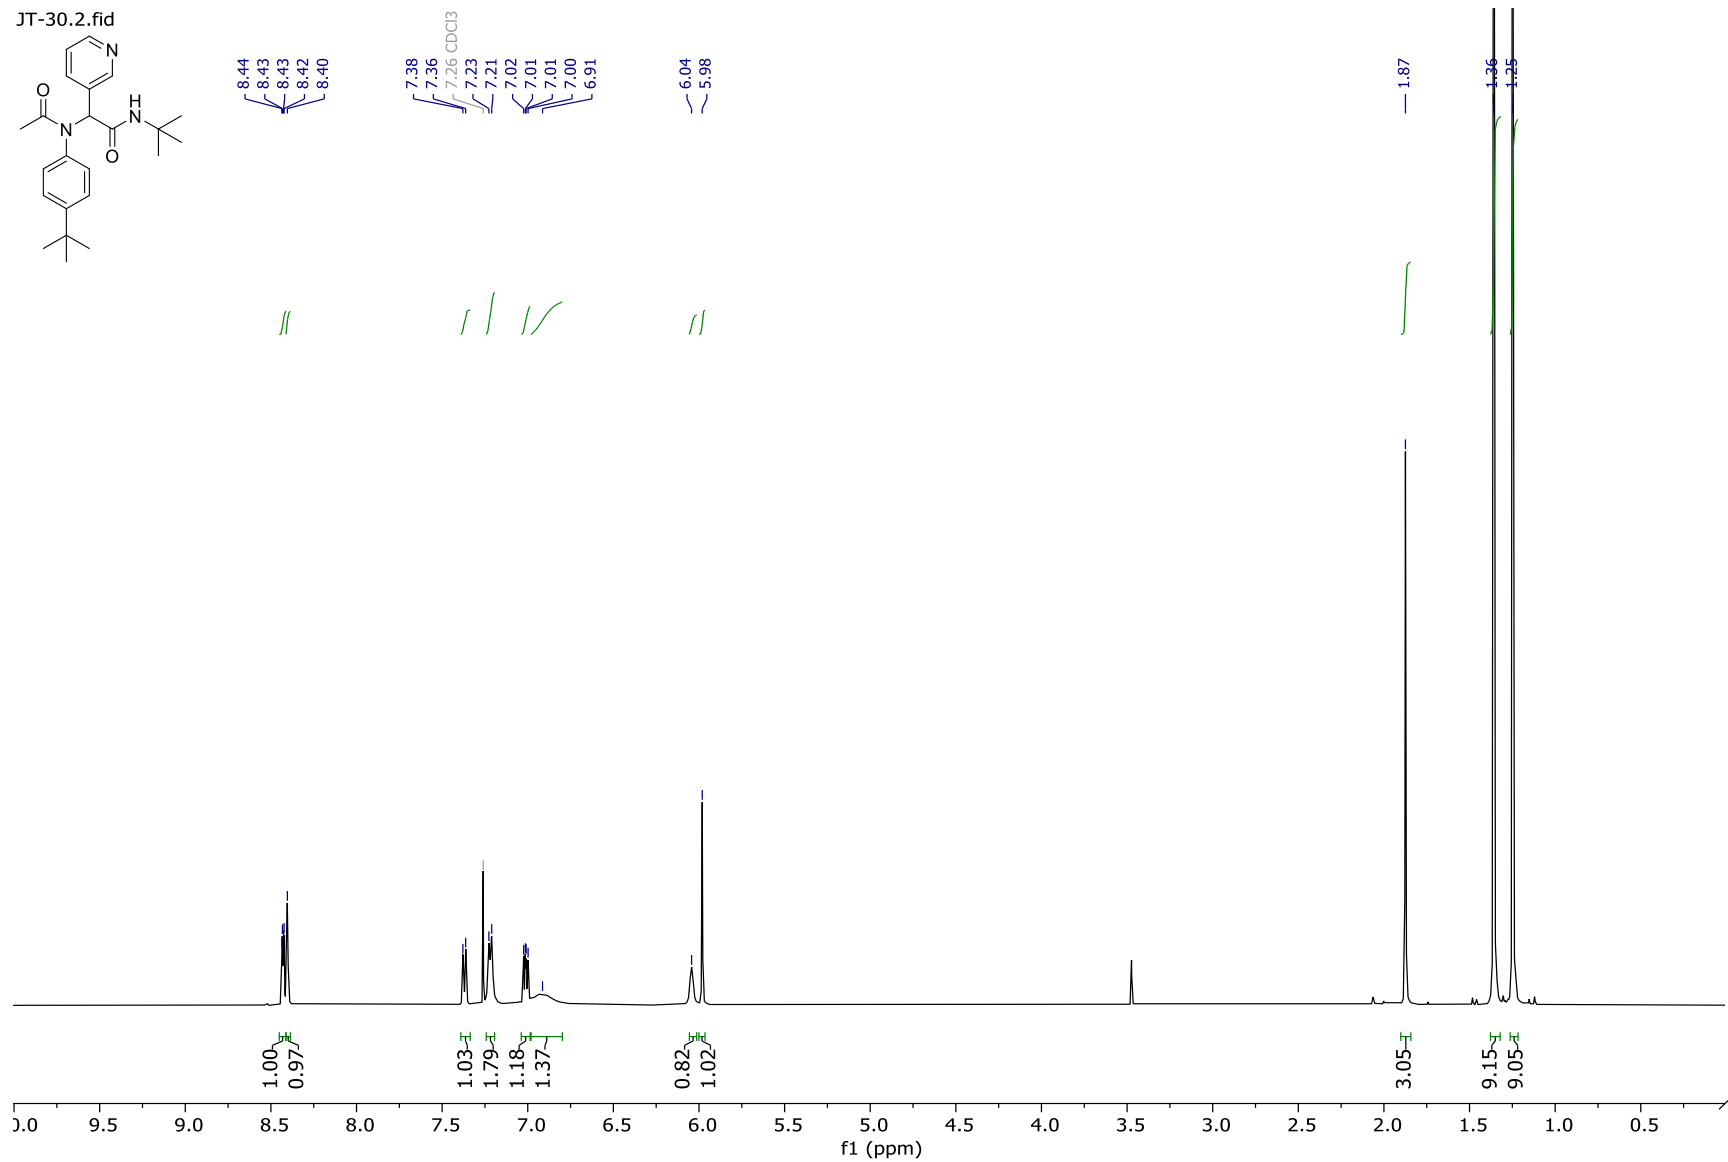

8. Compound **4b** <sup>13</sup>C NMR

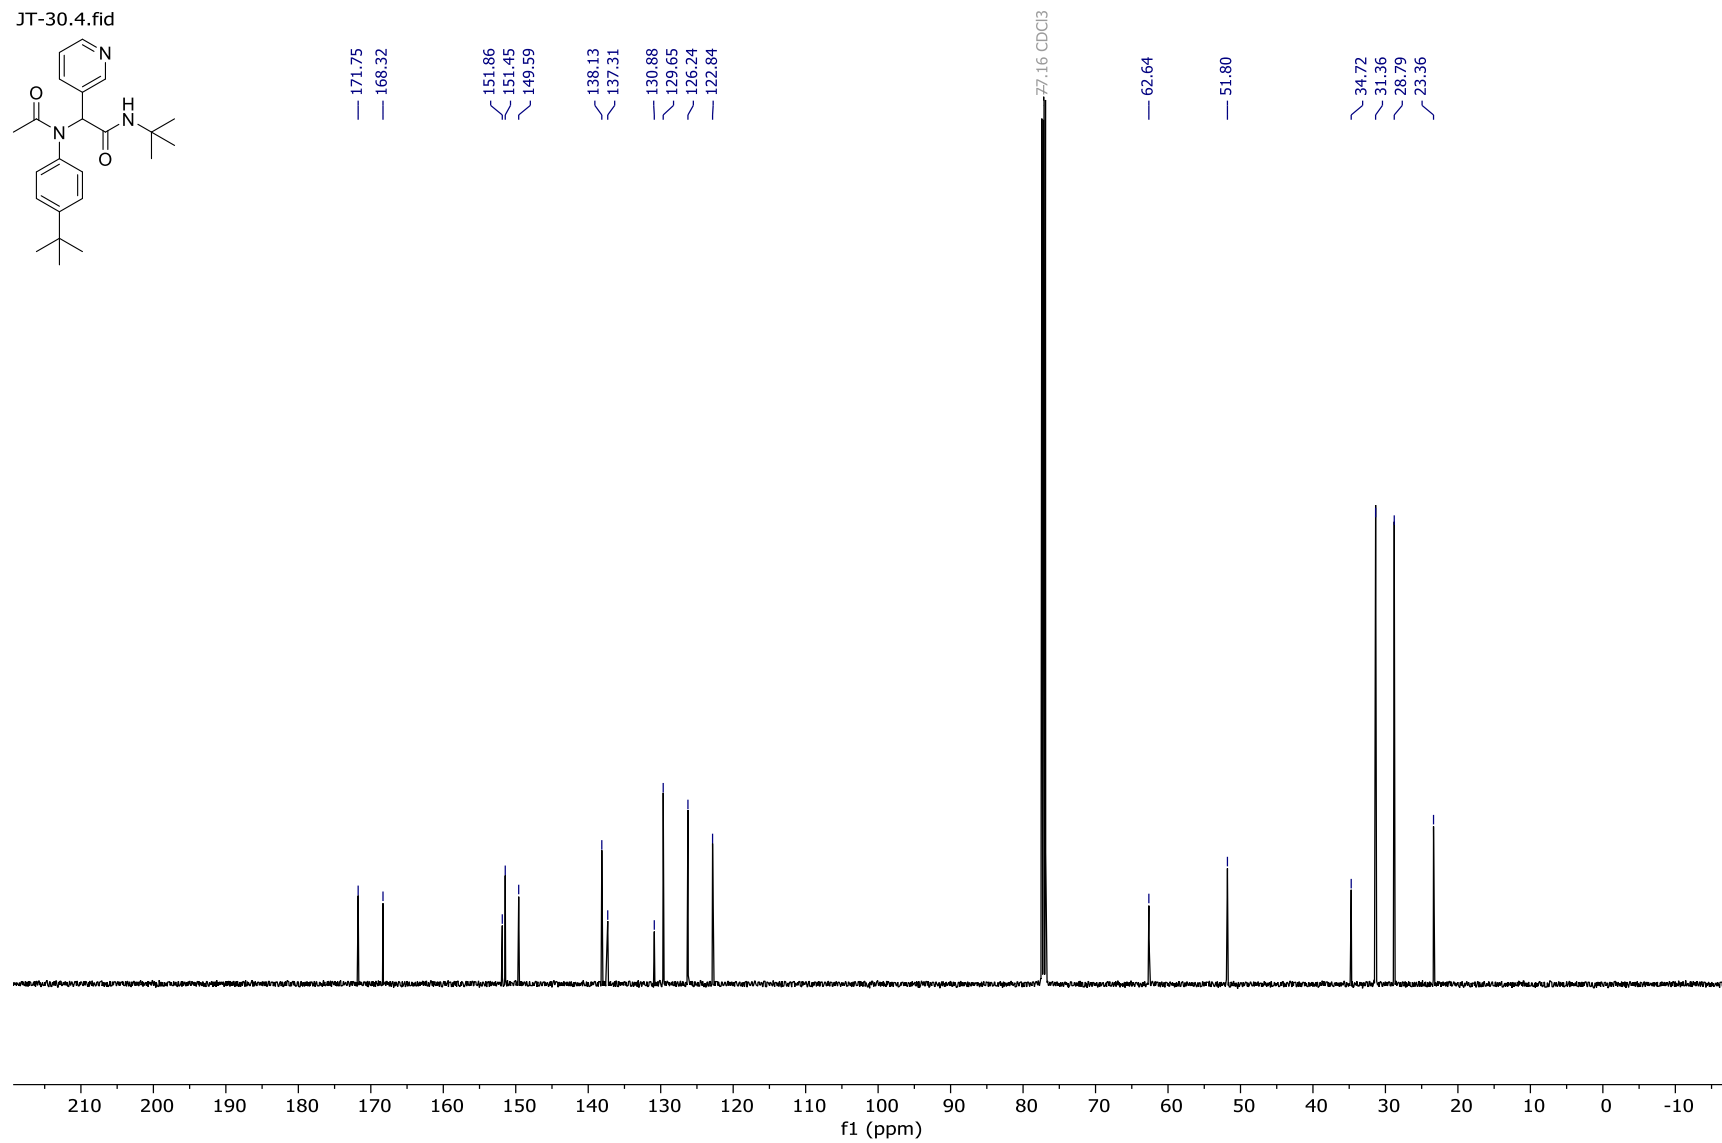

9. Compound 5a <sup>1</sup>H NMR

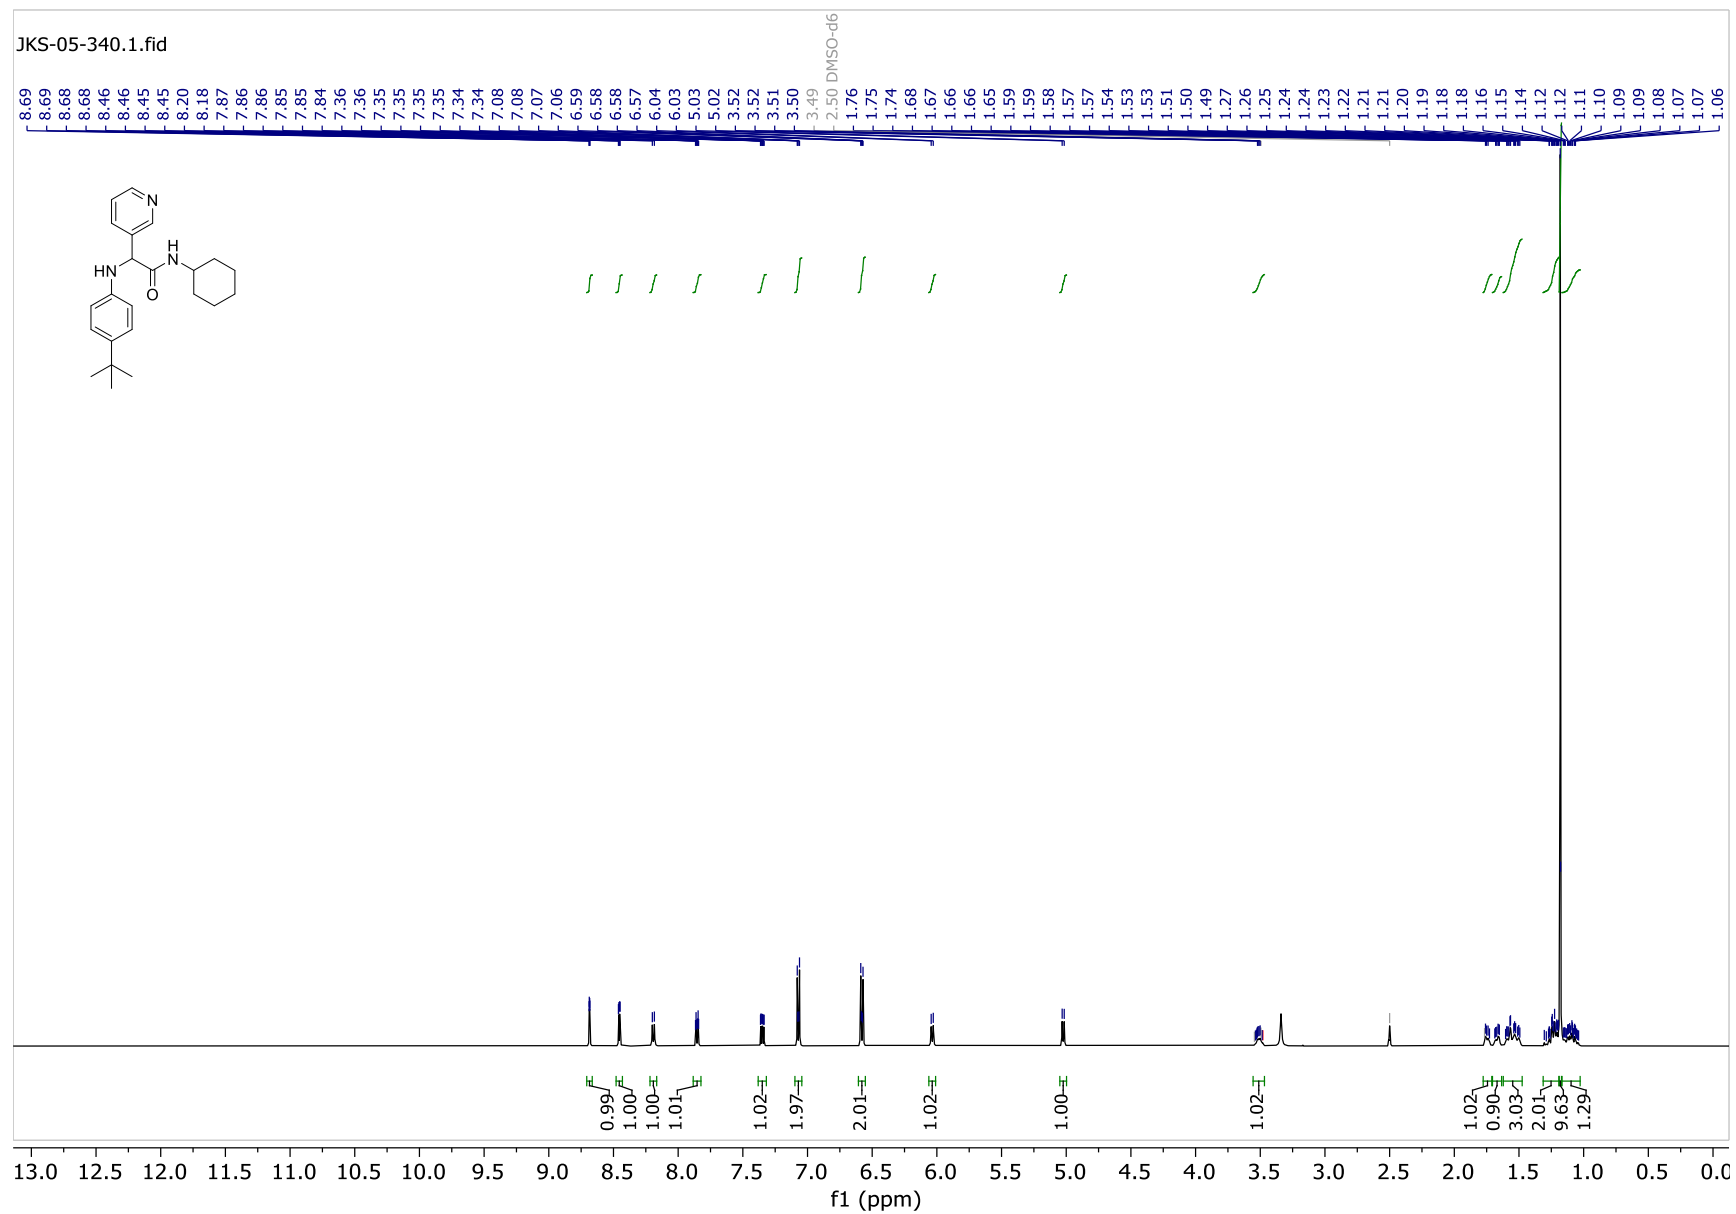

10. Compound **5a** <sup>13</sup>C NMR

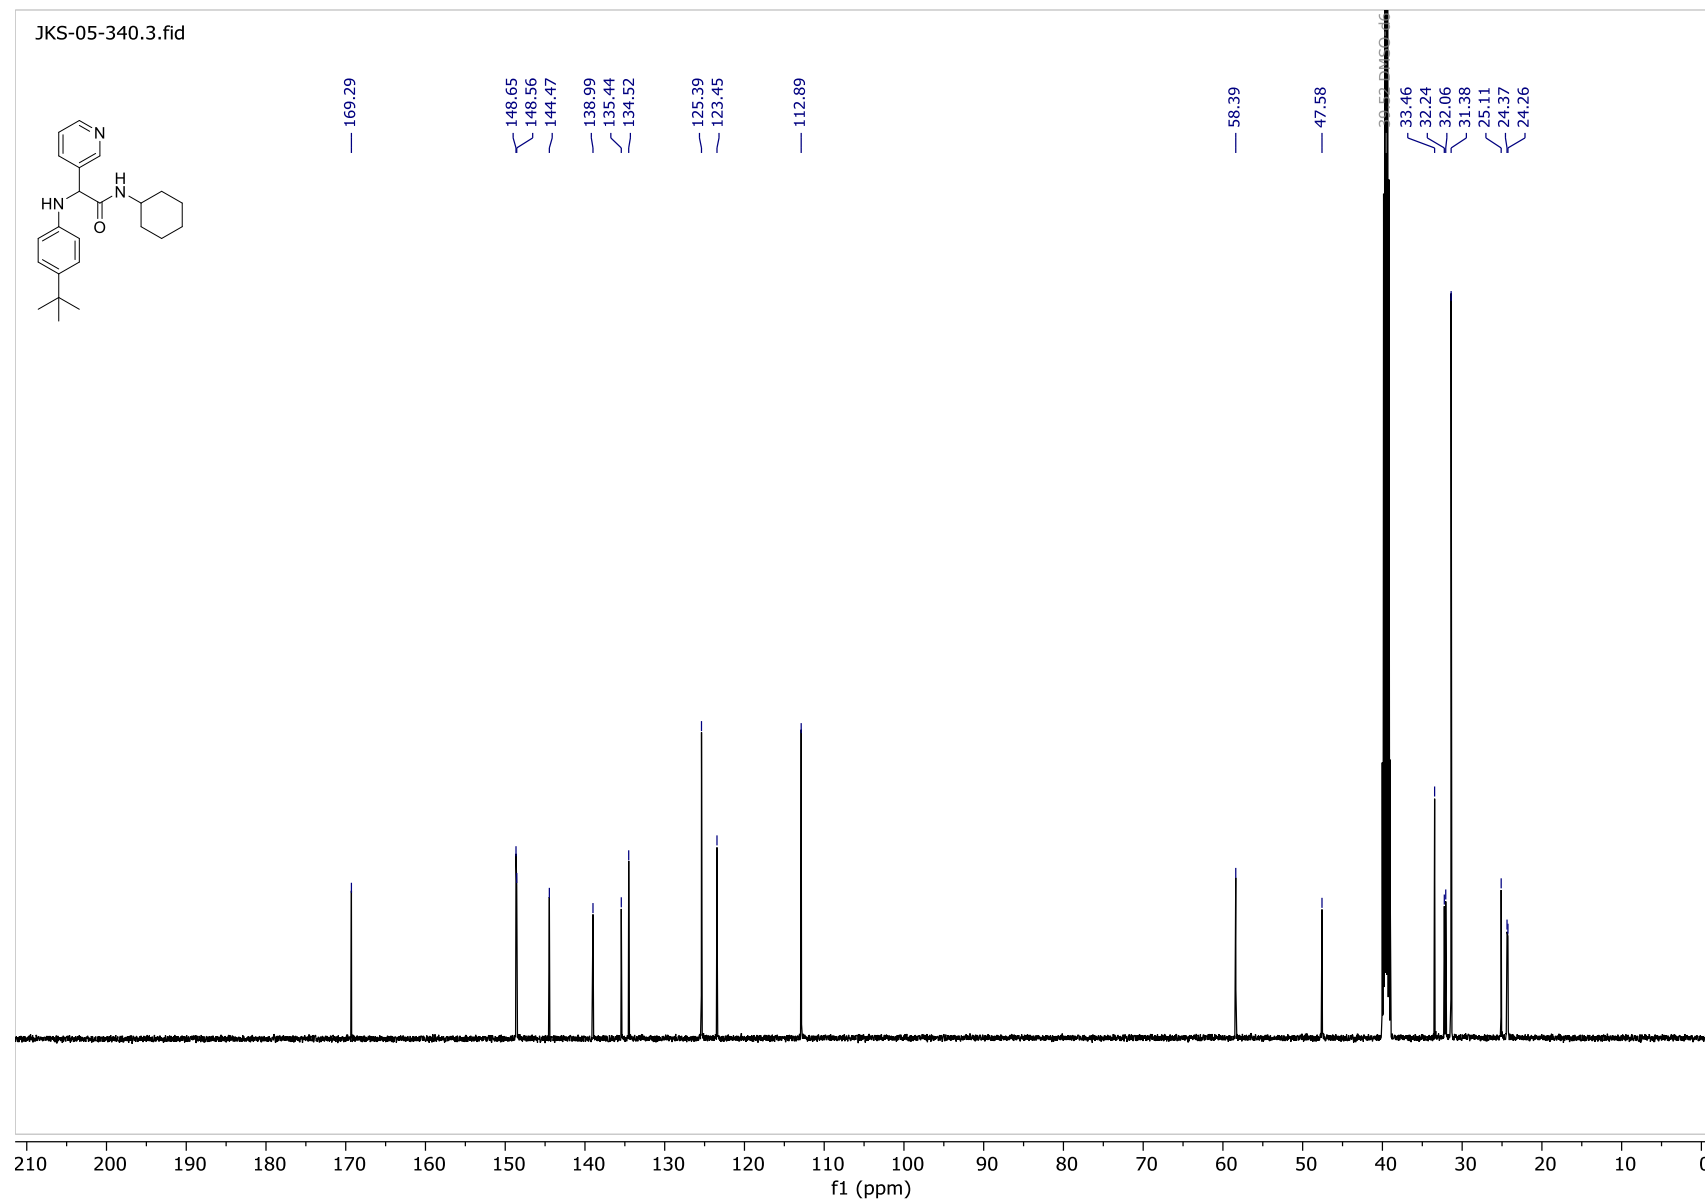

11. Compound **6a** <sup>1</sup>H NMR

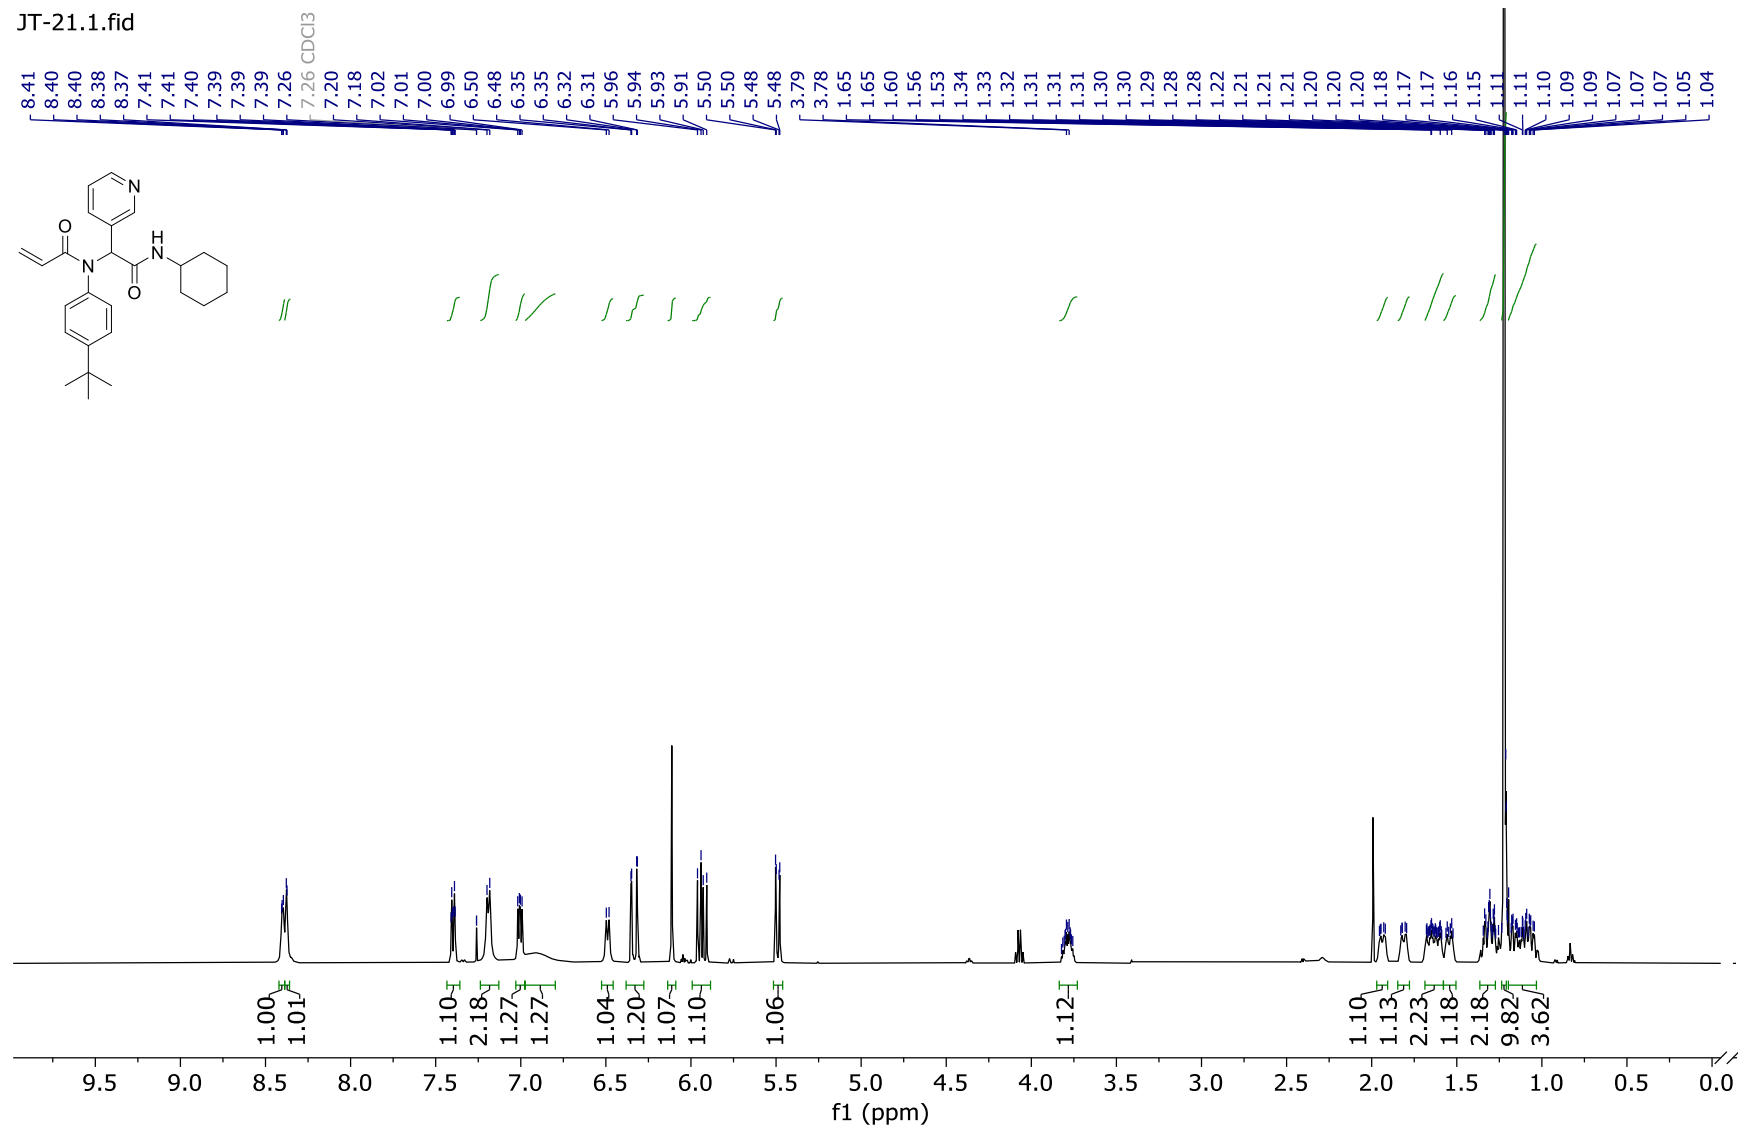

12. Compound **6a** <sup>13</sup>C NMR

JT-21.2.fid

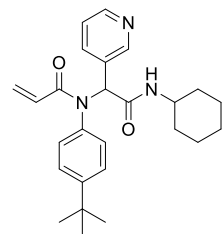

168.04  
166.50

151.79  
151.28  
149.45

137.93  
136.14  
130.83  
129.93  
128.64  
128.52  
126.08  
122.85

77.16 CDCl<sub>3</sub>

62.69

48.76

34.64  
32.86  
32.80  
31.27  
25.52  
24.83  
24.77

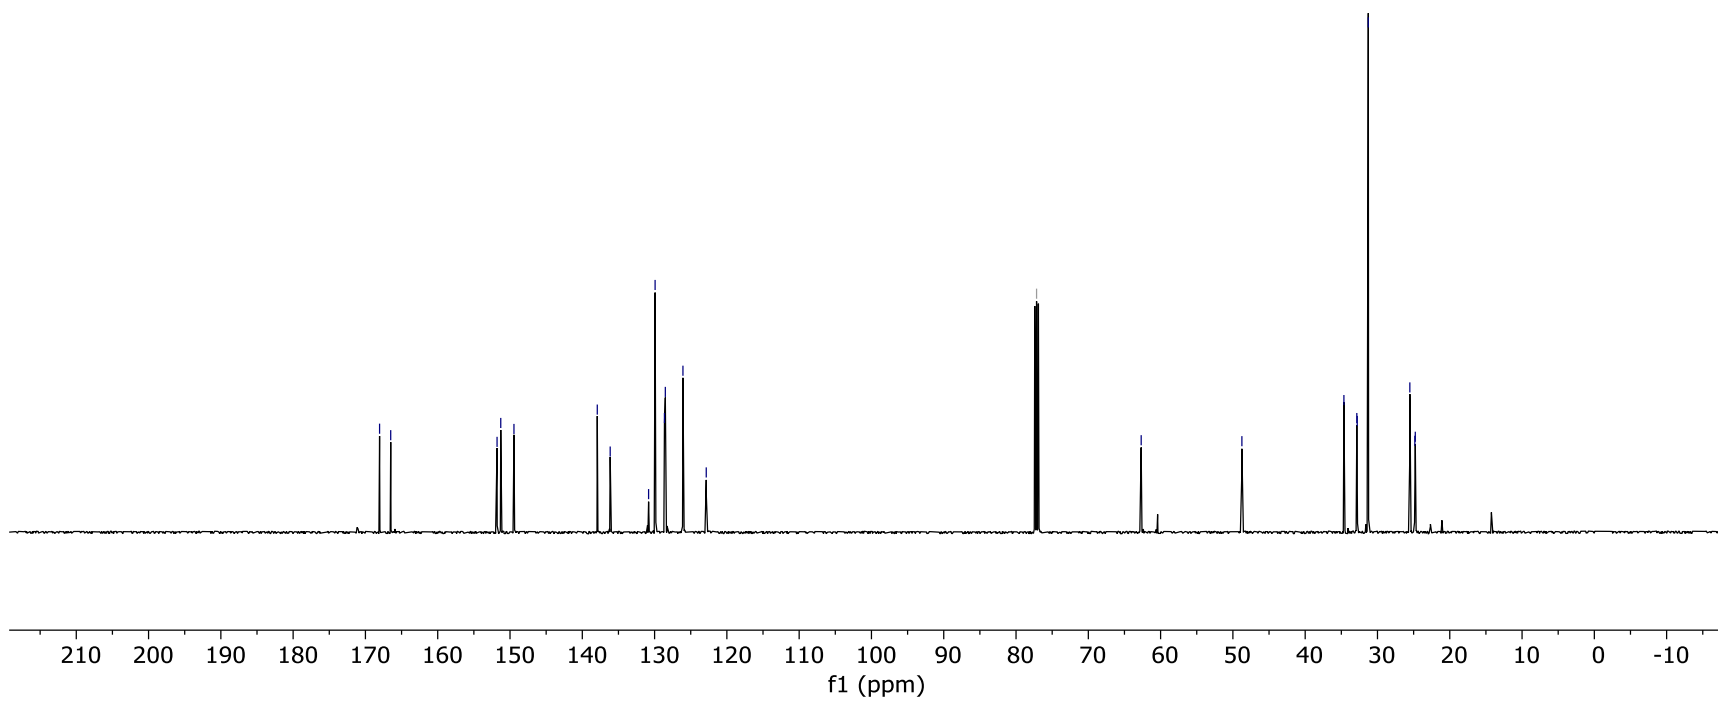



13. Compound **6b** <sup>1</sup>H NMR

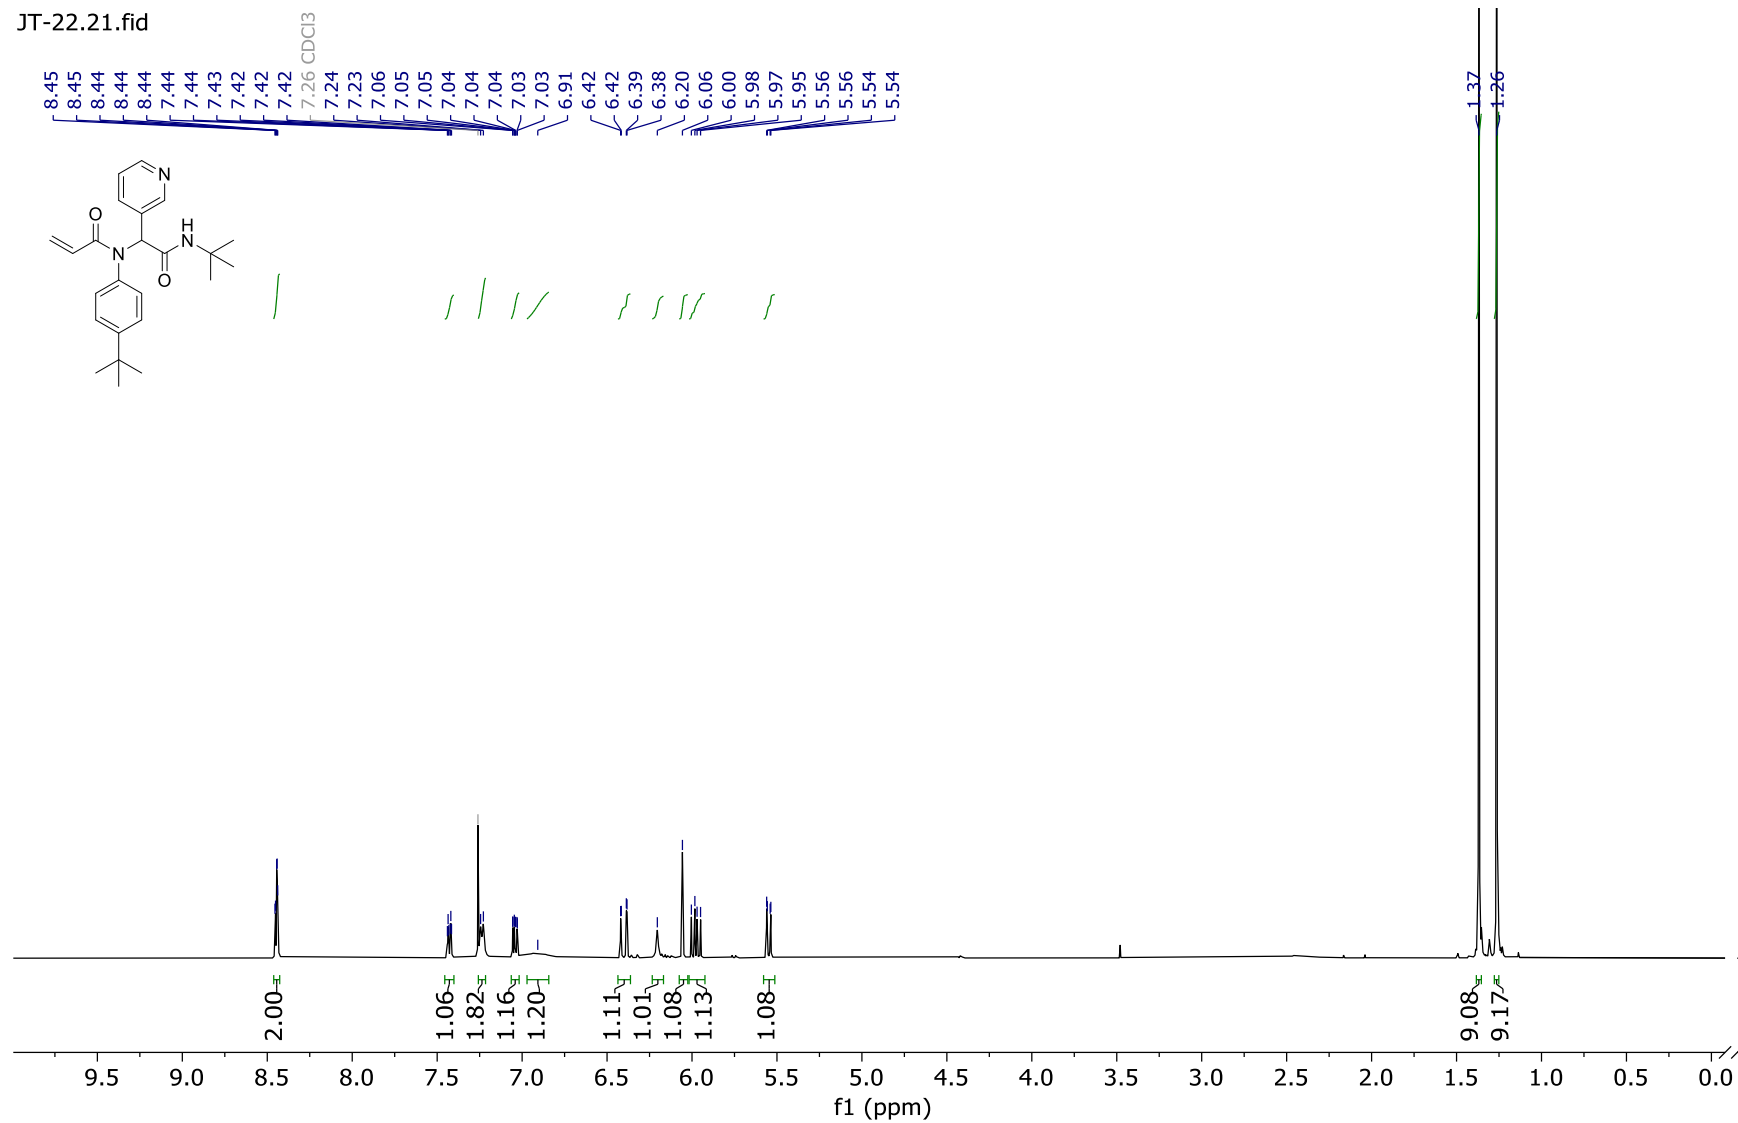

### 14. Compound **6b** <sup>13</sup>C NMR

JT-22.22.fid

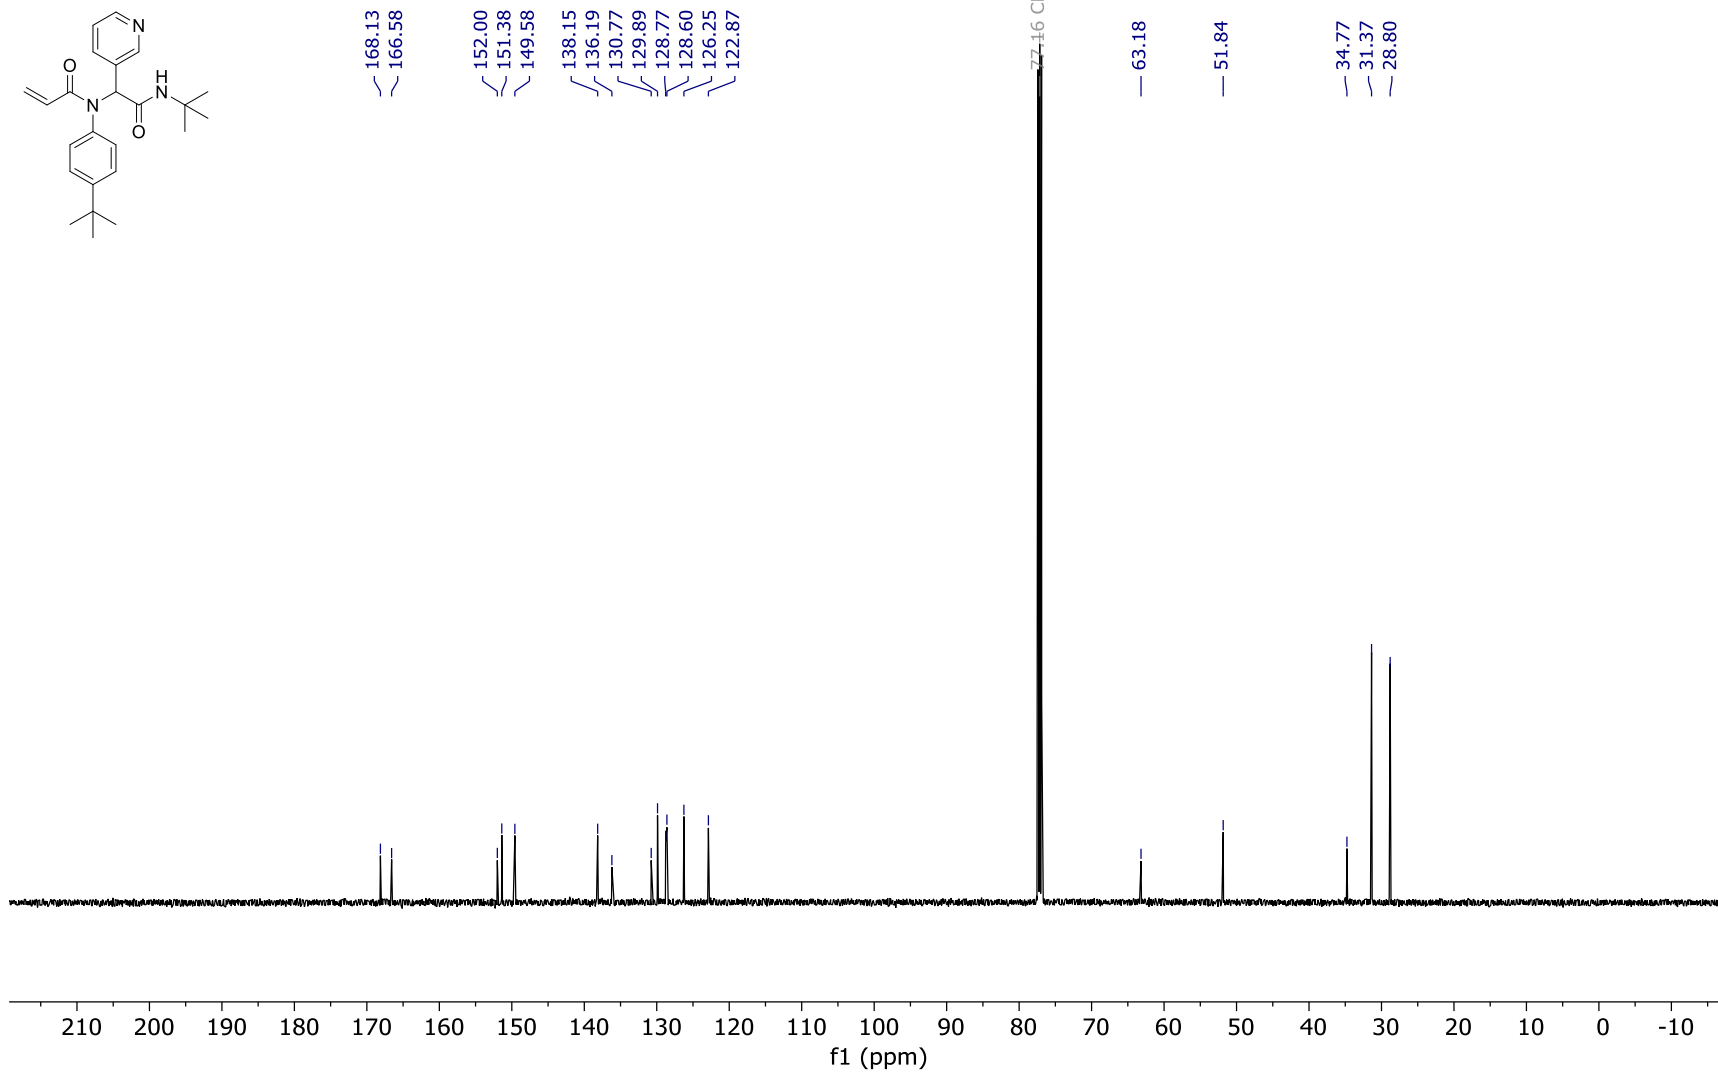

15. Compound **7a** <sup>1</sup>H NMR

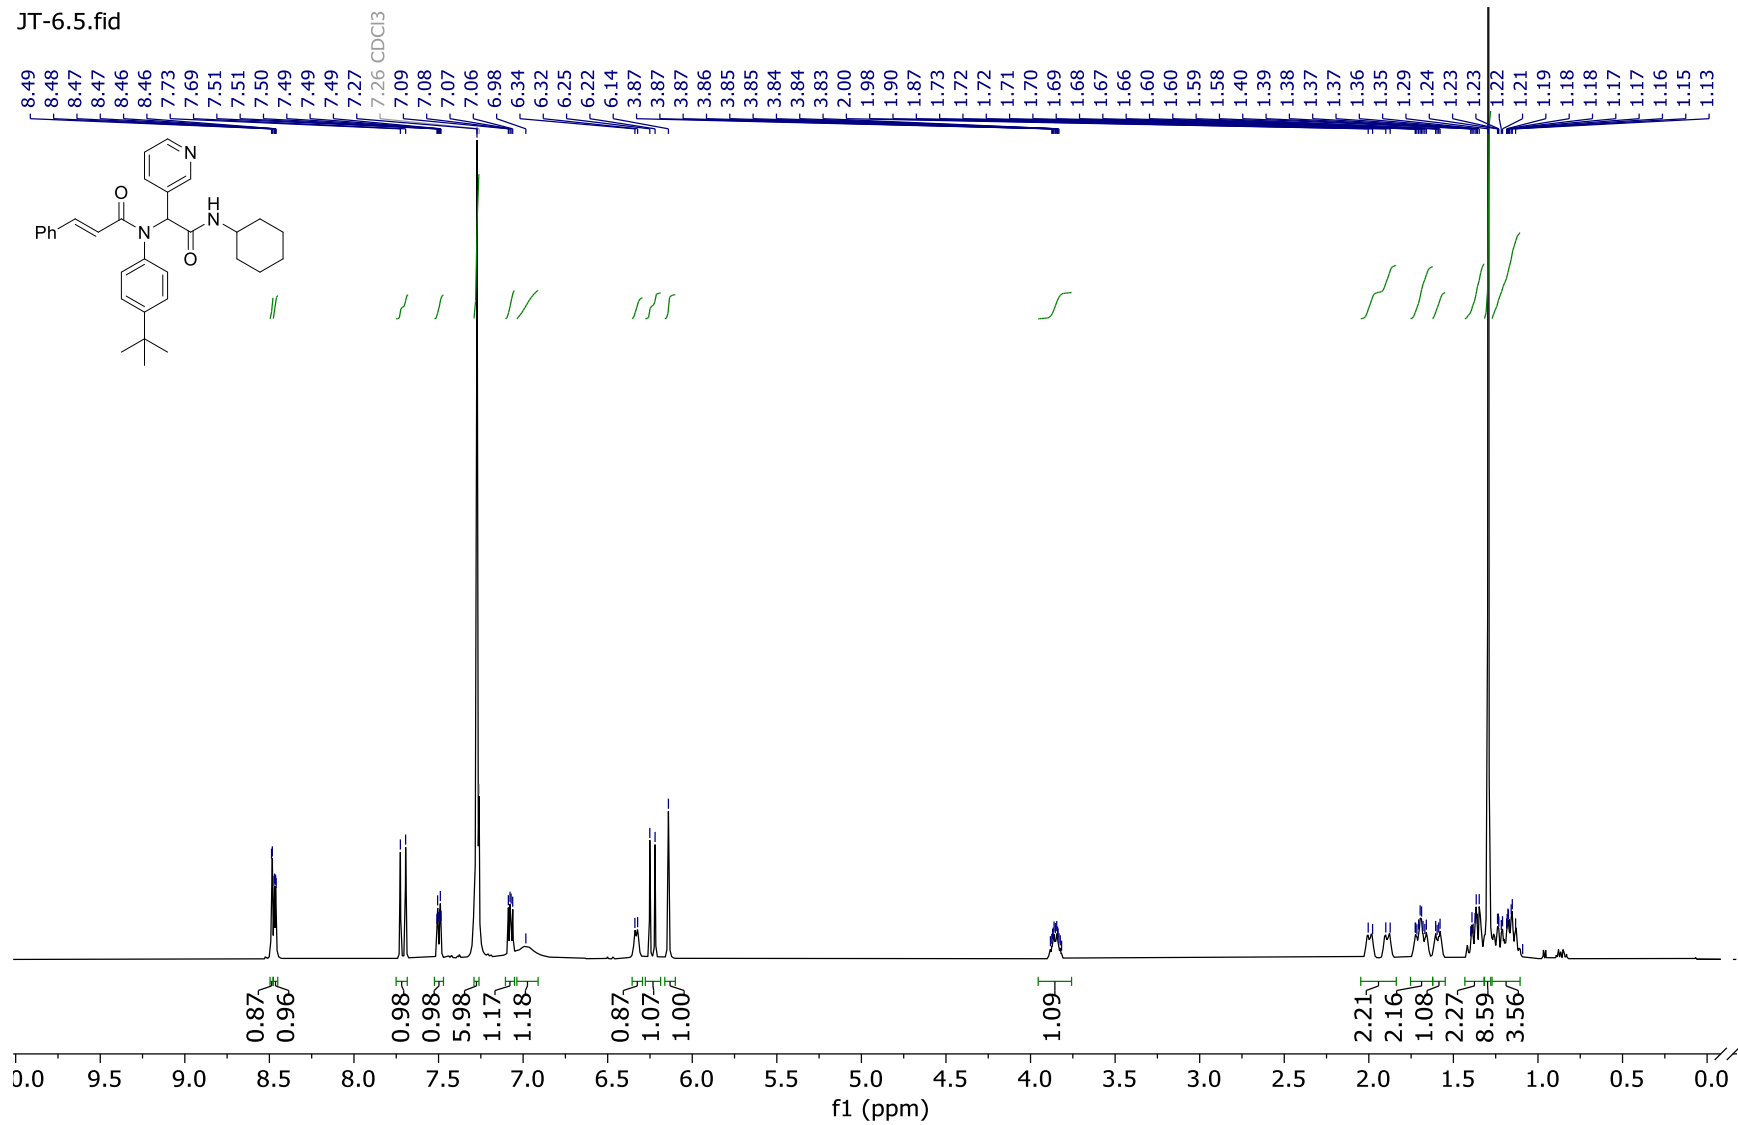

16. Compound **7a** <sup>13</sup>C NMR

JT-6.6.fid

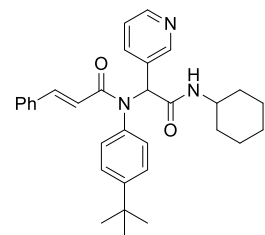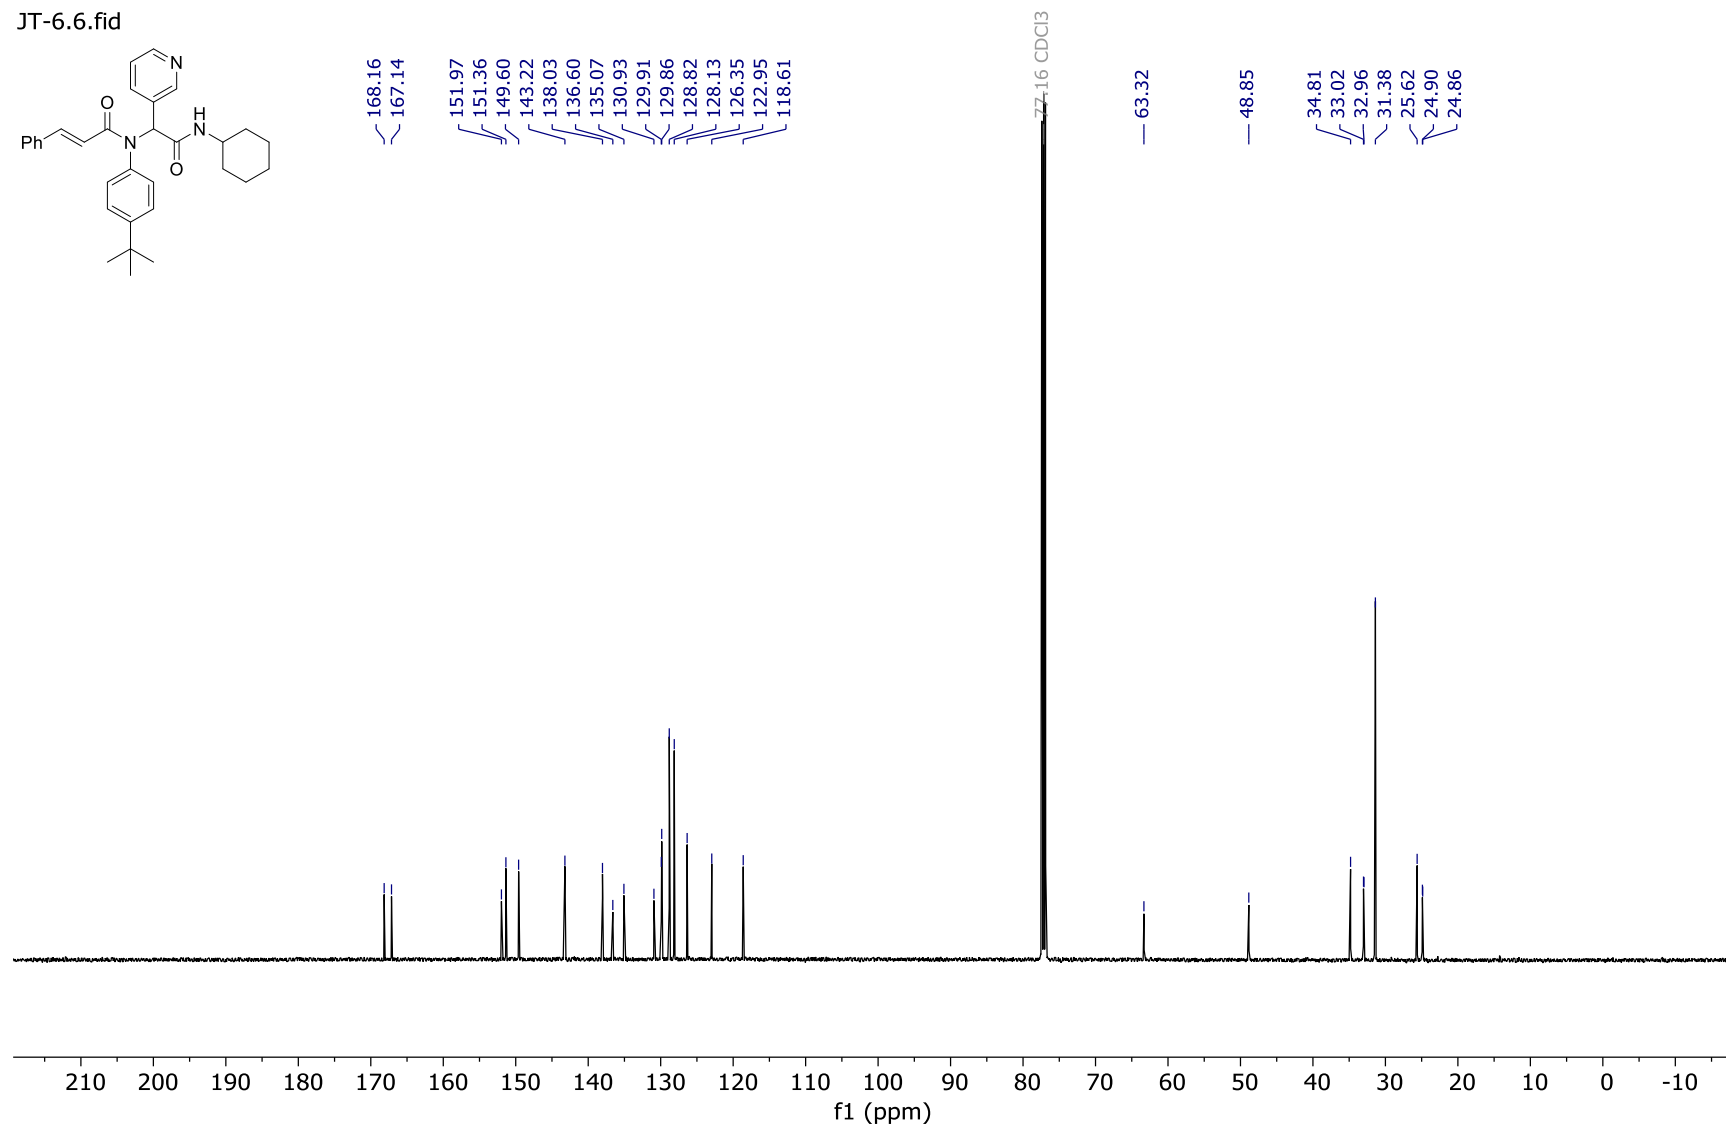

17. Compound **8a** <sup>1</sup>H NMR

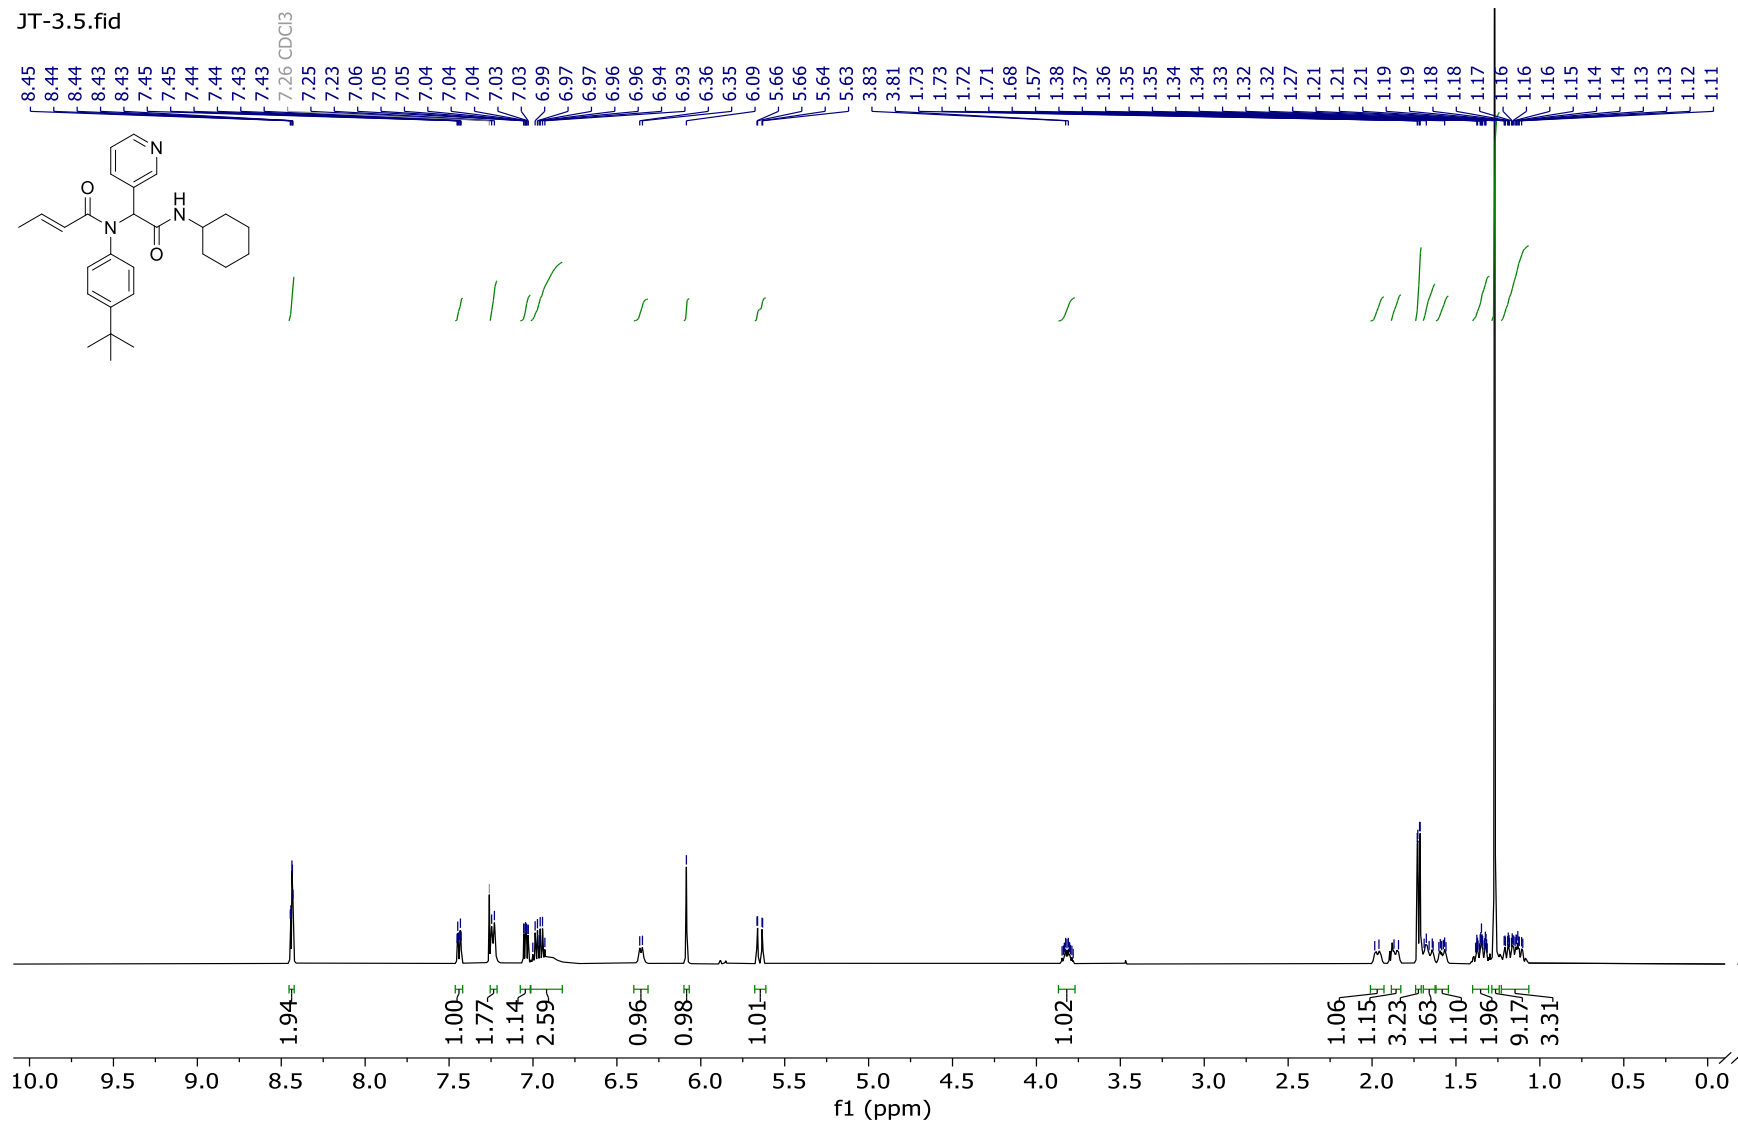

18. Compound **8a** <sup>13</sup>C NMR

JT-3.6.fid

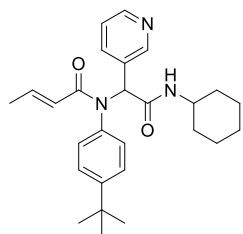

168.25  
166.99

151.78  
151.24  
149.41  
143.08  
138.09  
136.62  
131.00  
129.80  
126.22  
122.88  
122.71

77.16 CDCl<sub>3</sub>

62.96

48.78

34.75  
32.97  
32.91  
31.37  
25.62  
24.88  
24.84  
18.21

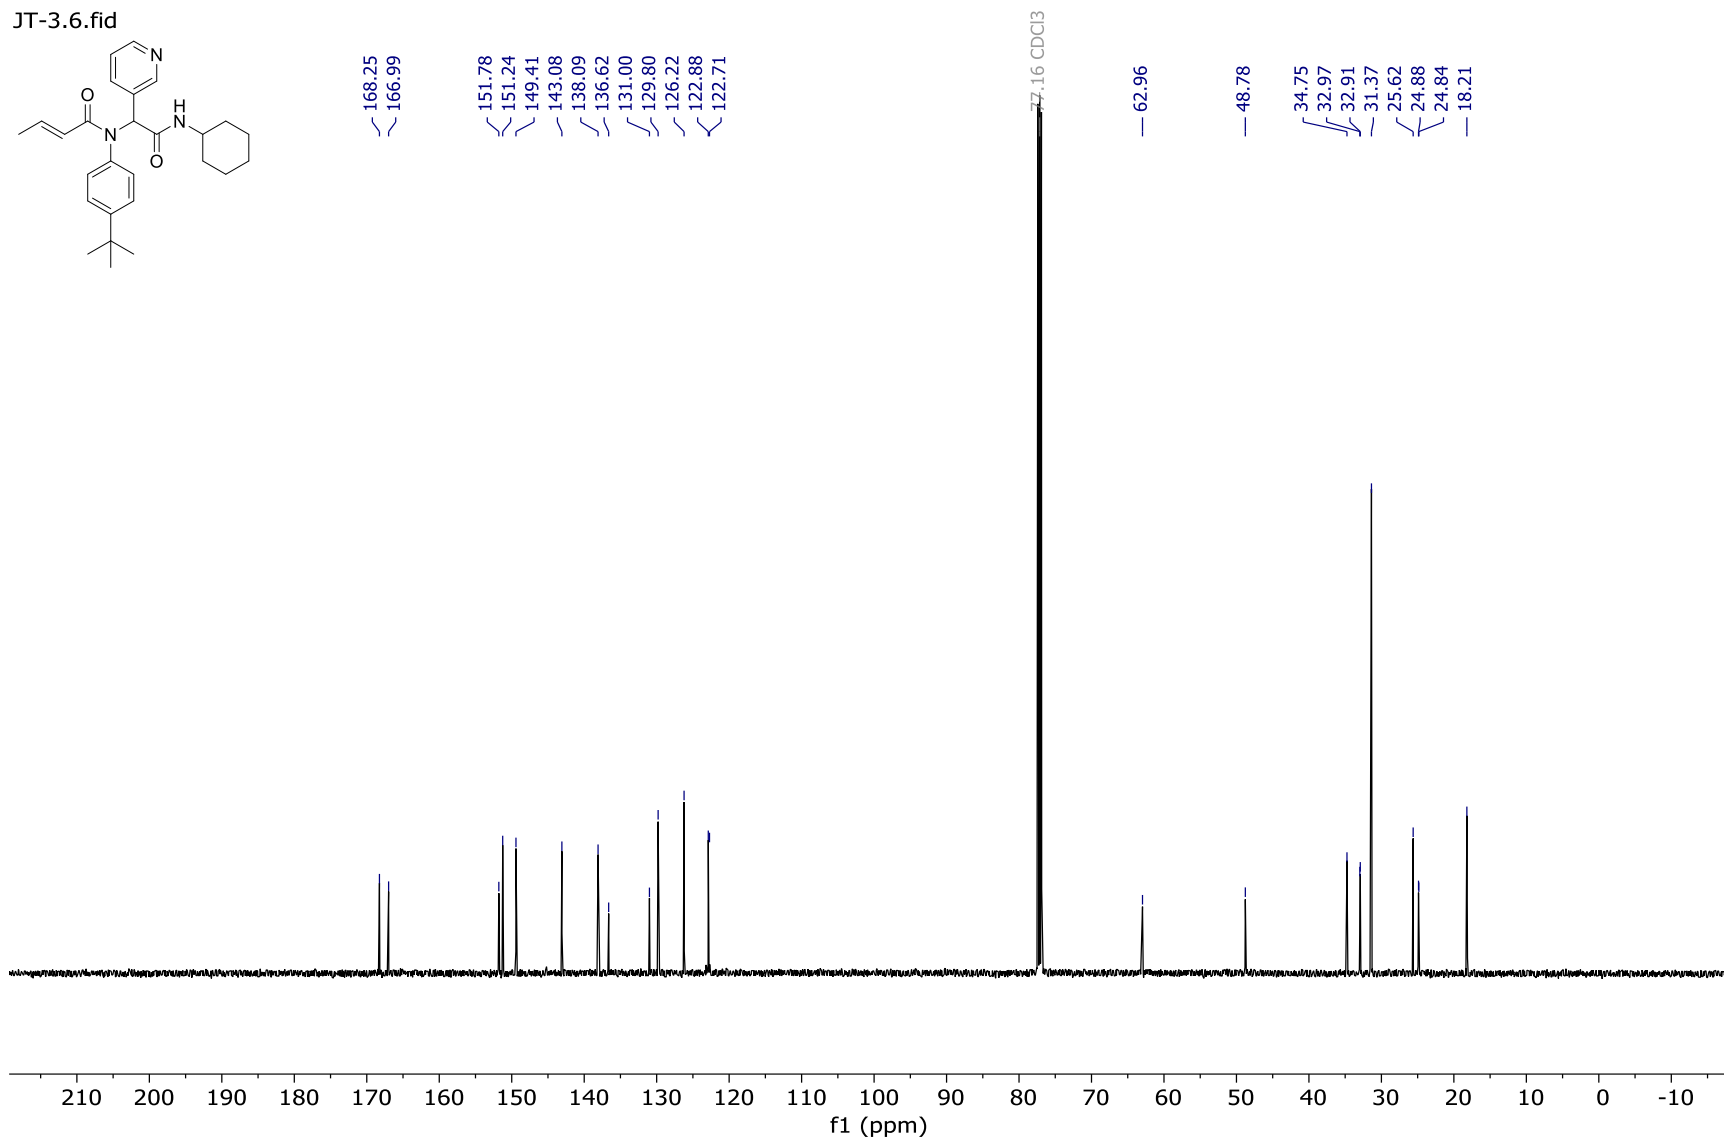

19. Compound **8b** <sup>1</sup>H NMR

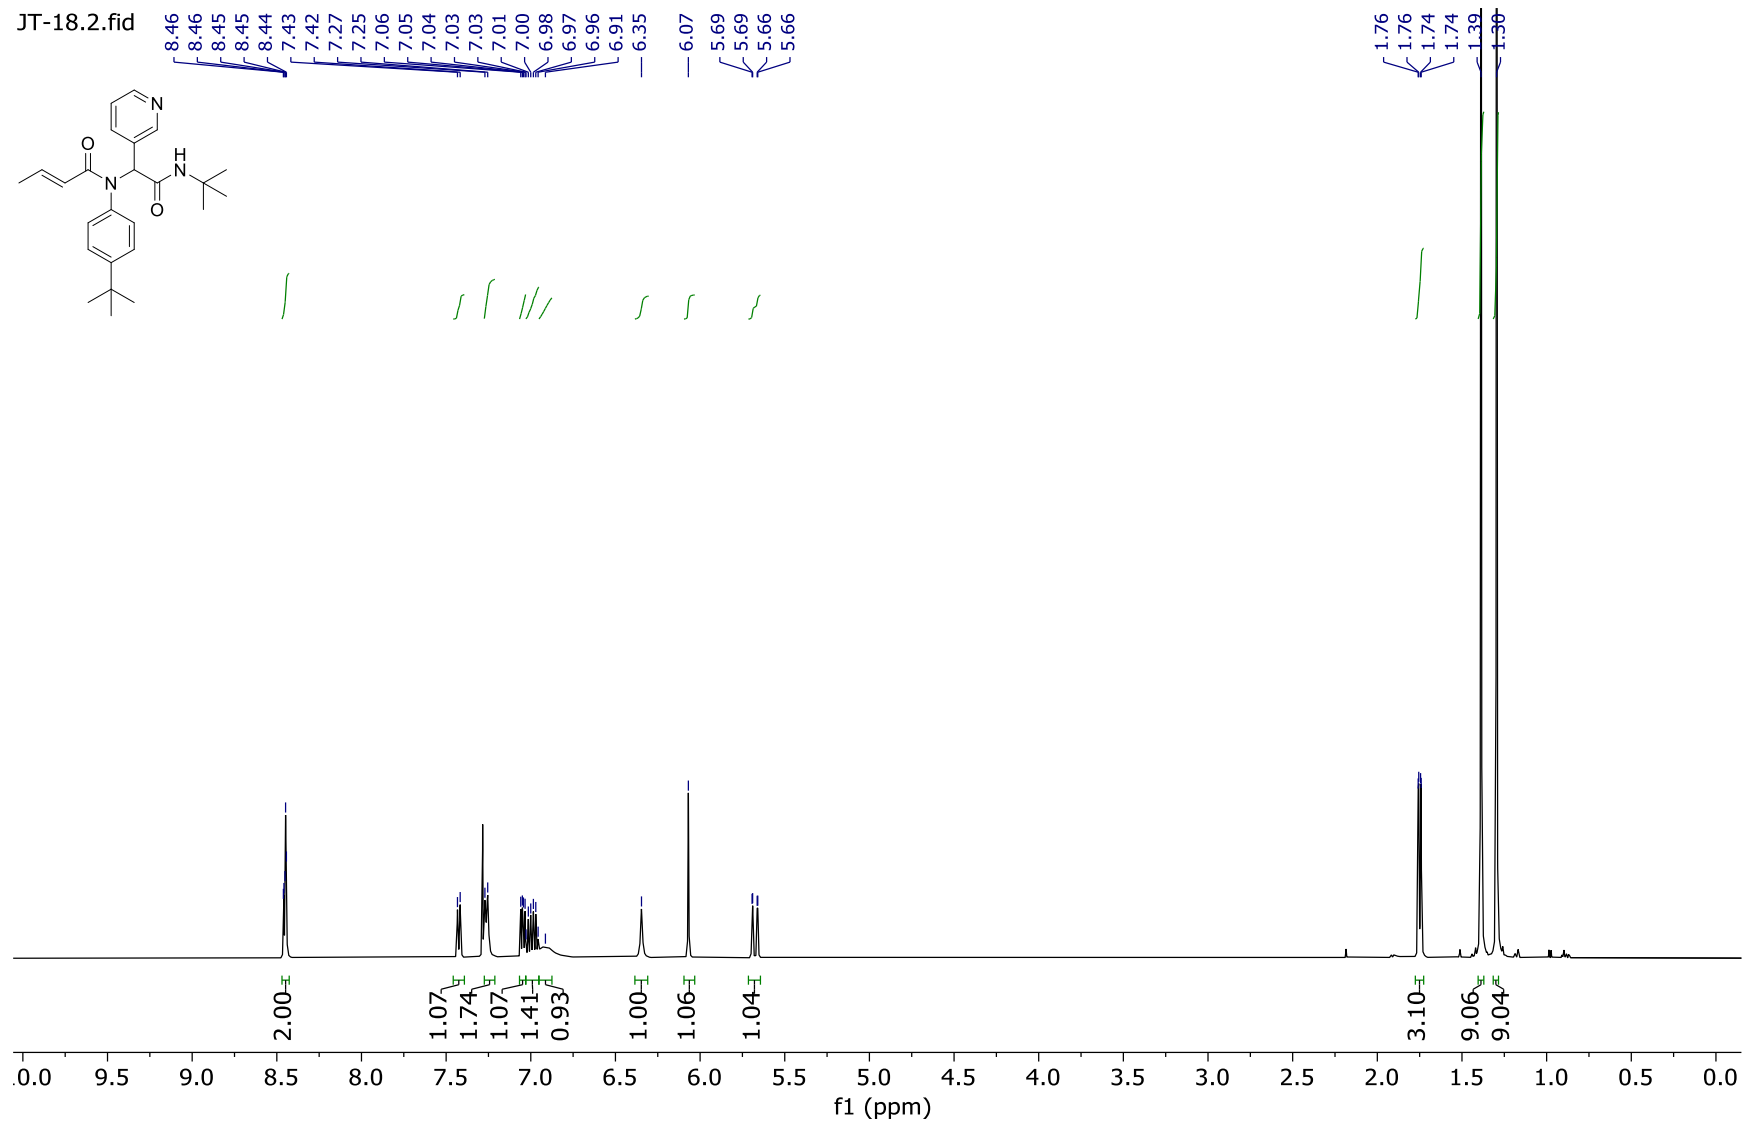

20. Compound **8b** <sup>13</sup>C NMR

JT-18.3.fid

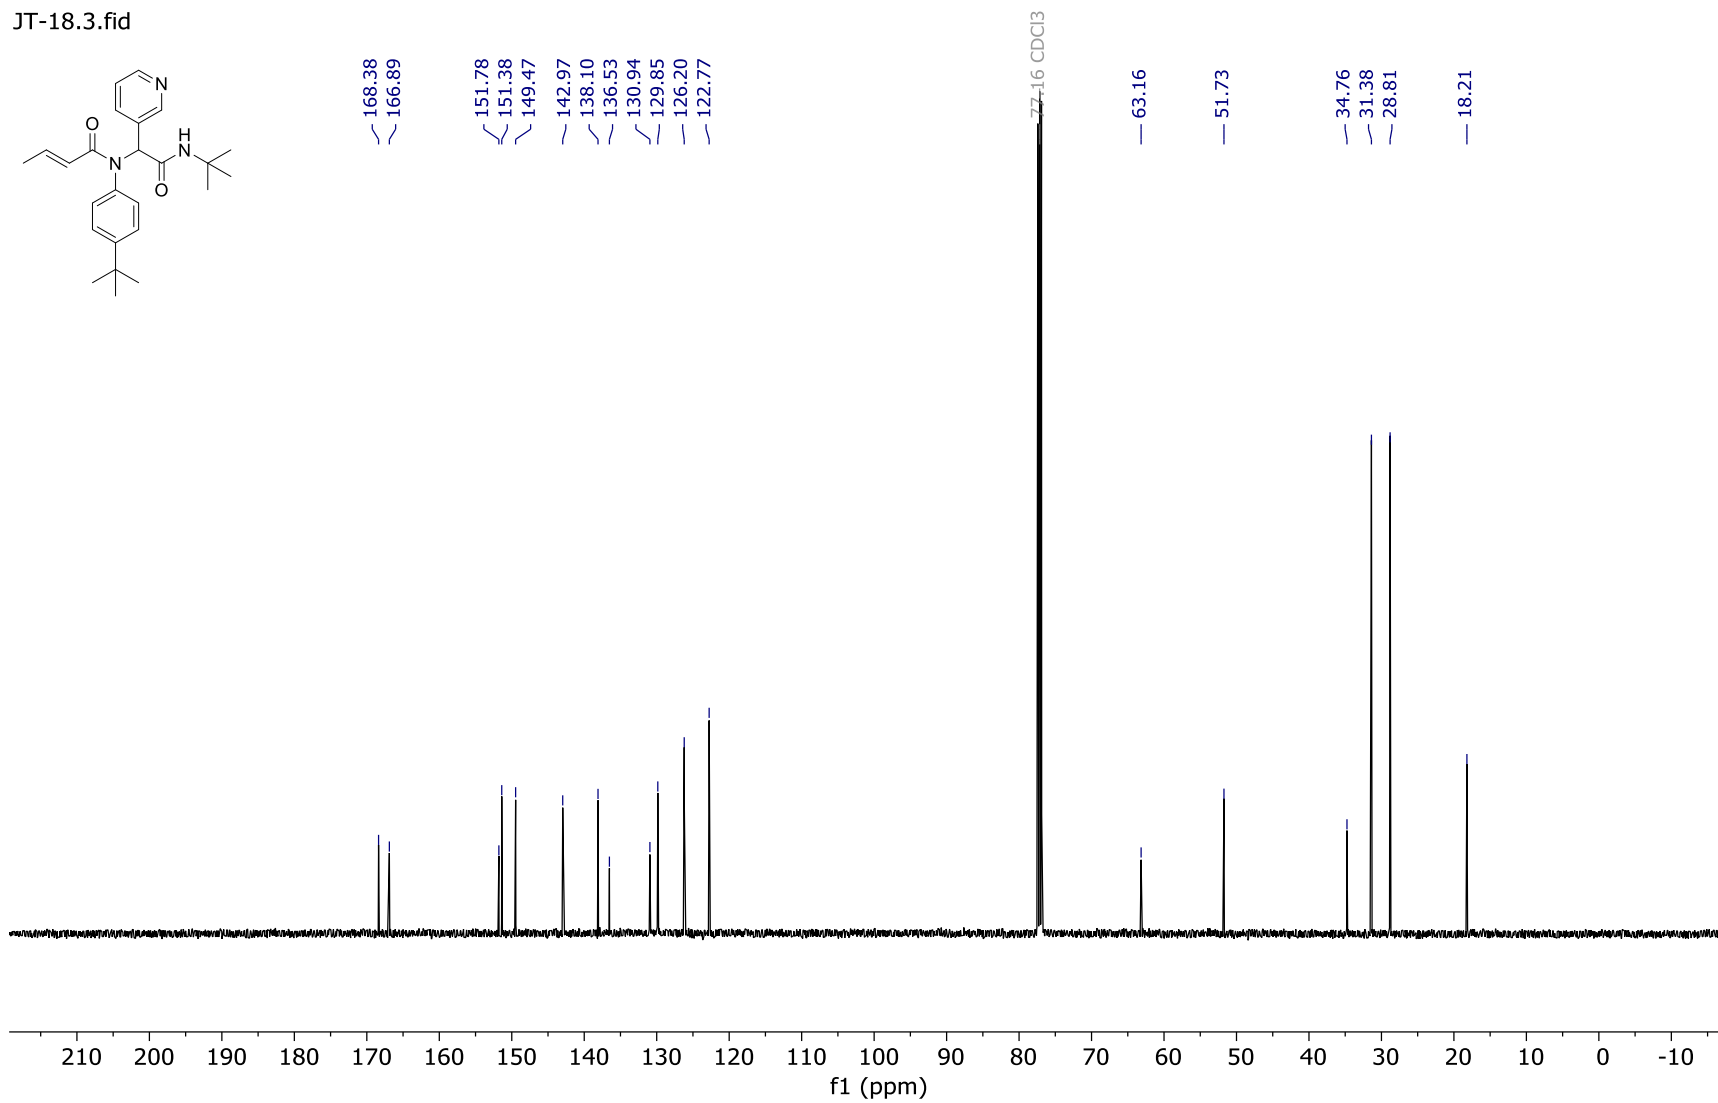



21. Compound **8c** <sup>1</sup>H NMR

JT-35-Product, 1.fid

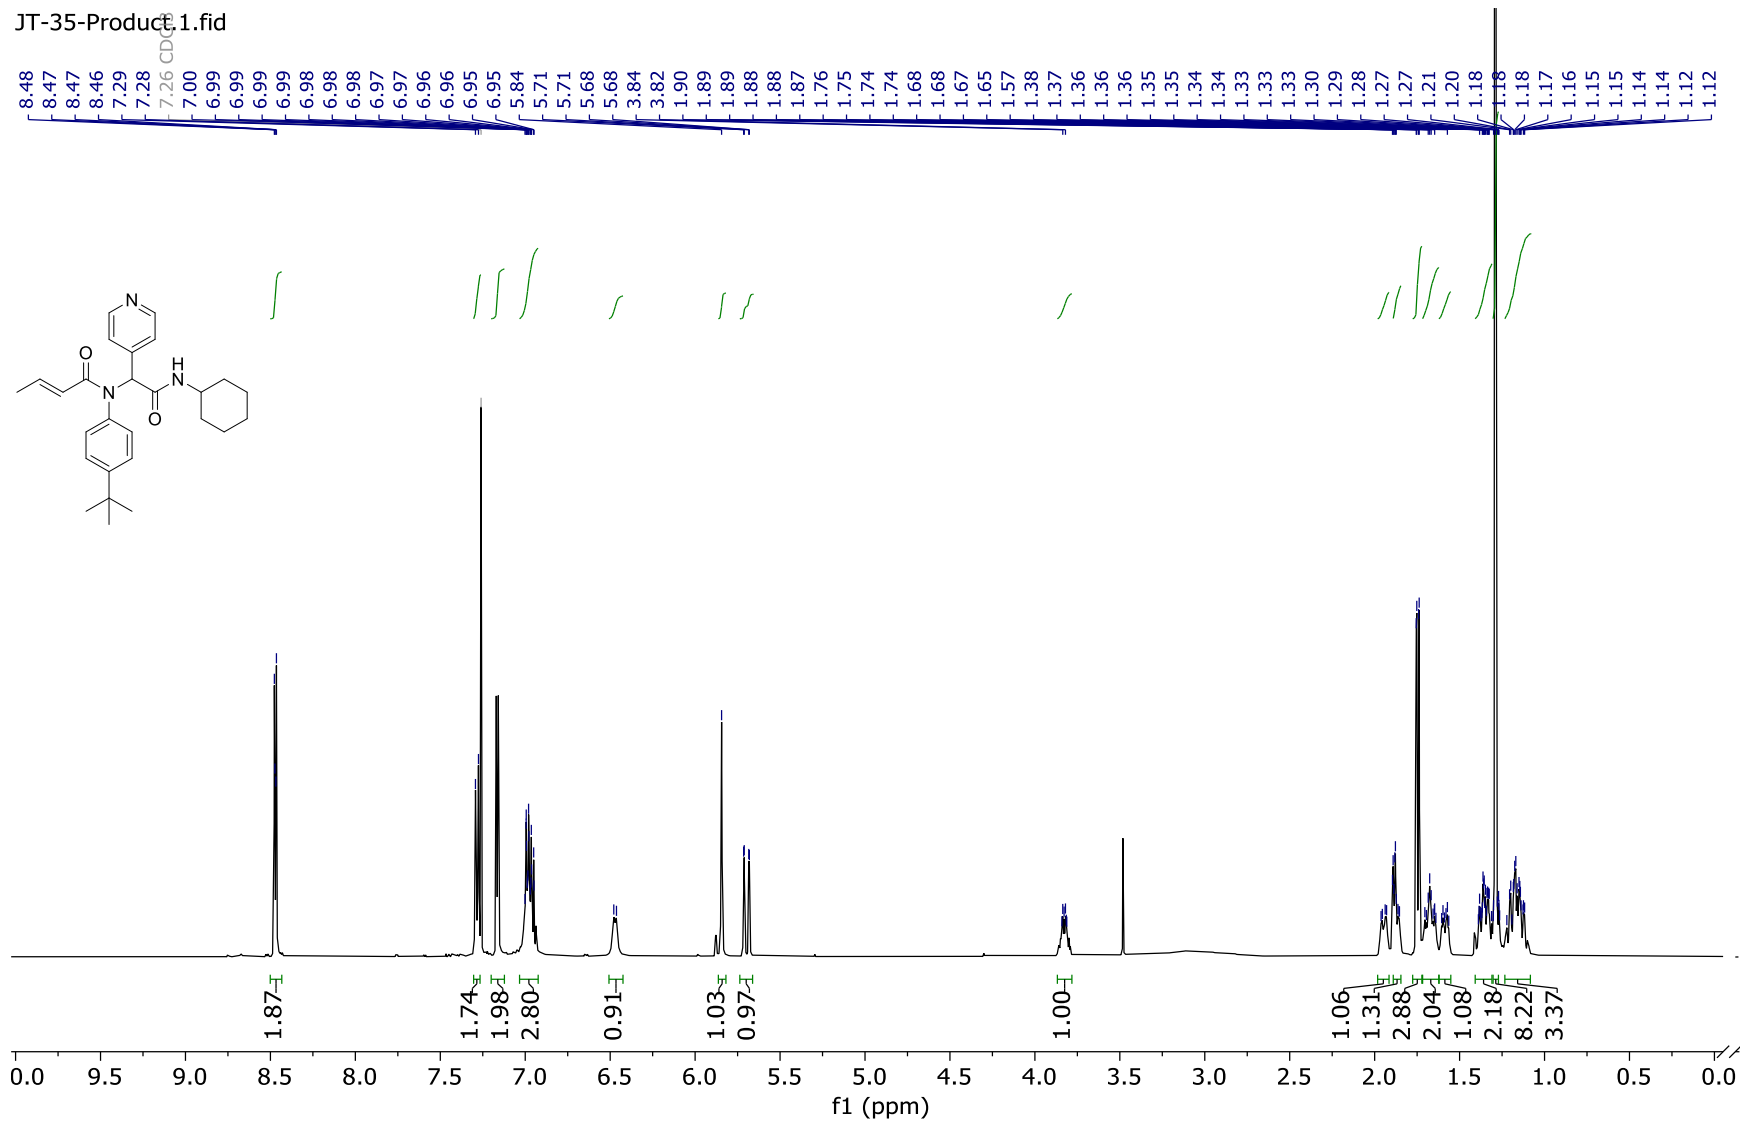

## 22. Compound **8c** <sup>13</sup>C NMR

JT-35-Product.2.fid

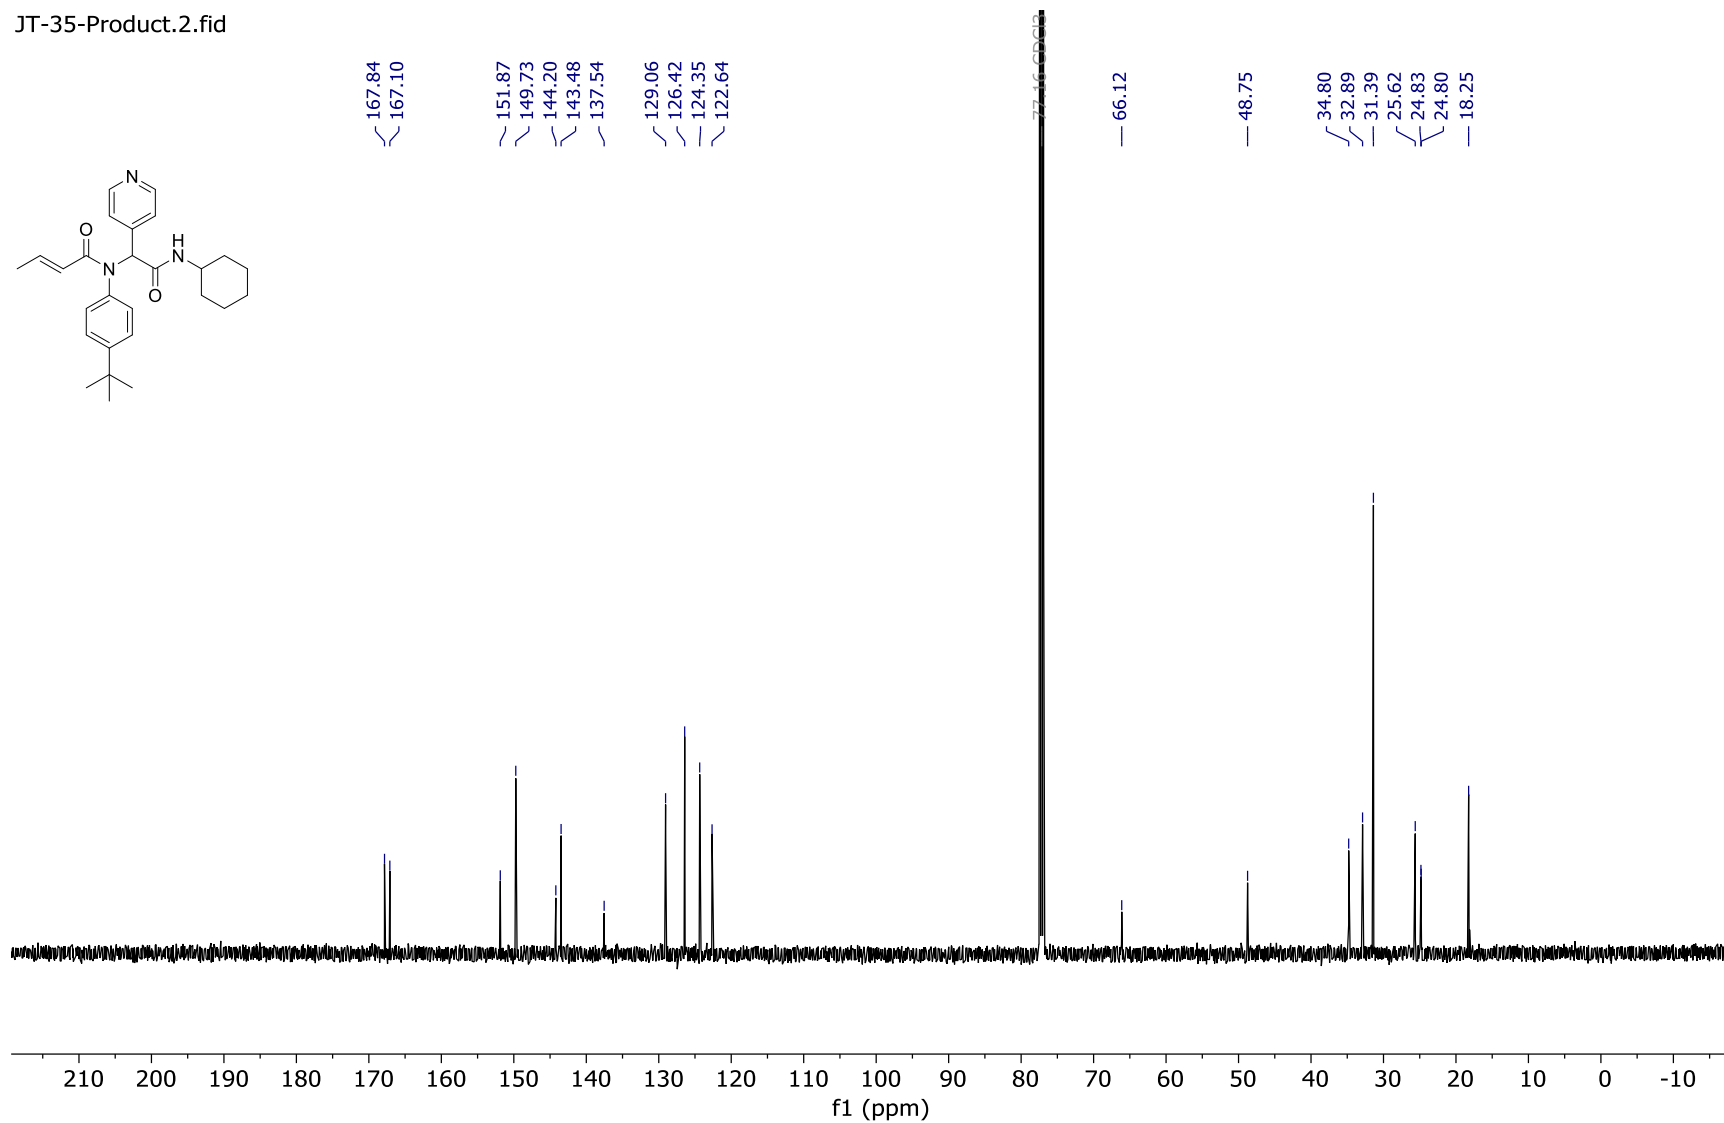

23. Compound **9a** <sup>1</sup>H NMR

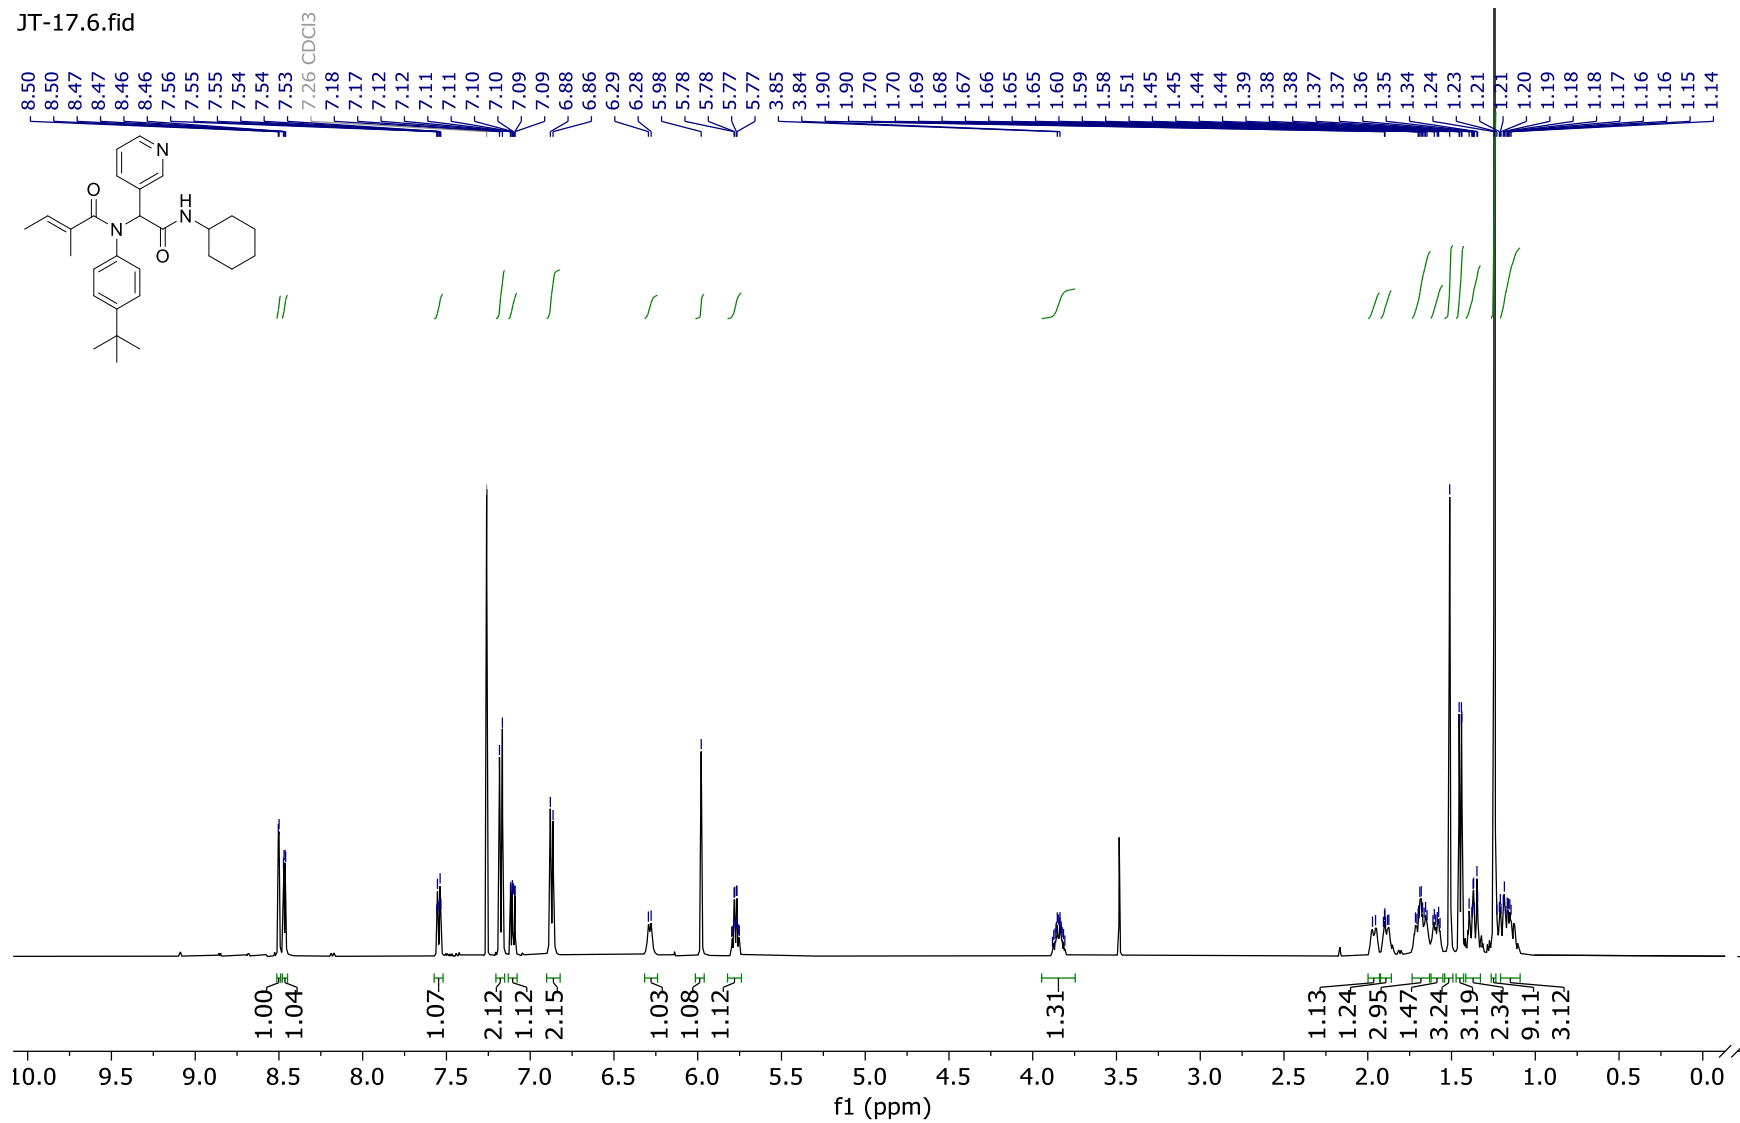

24. Compound **9a** <sup>13</sup>C NMR

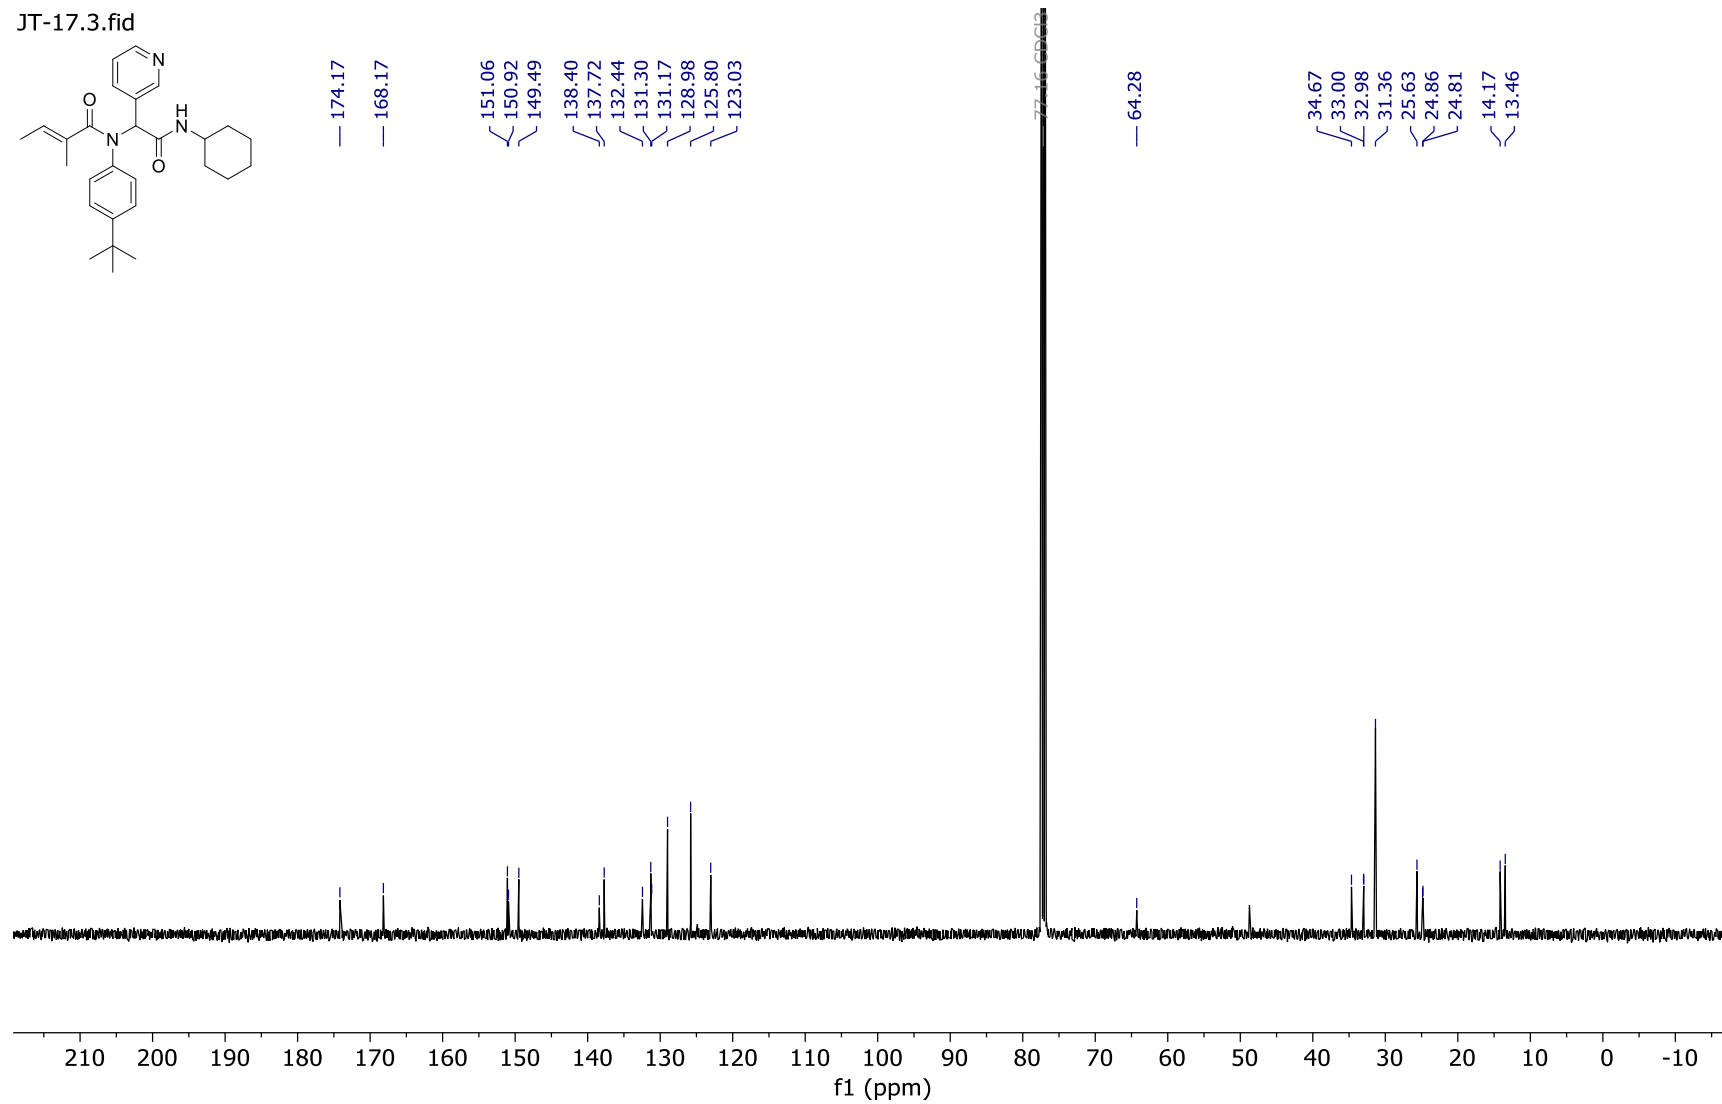

25. Compound 10a <sup>1</sup>H NMR

JT-4.4.fid

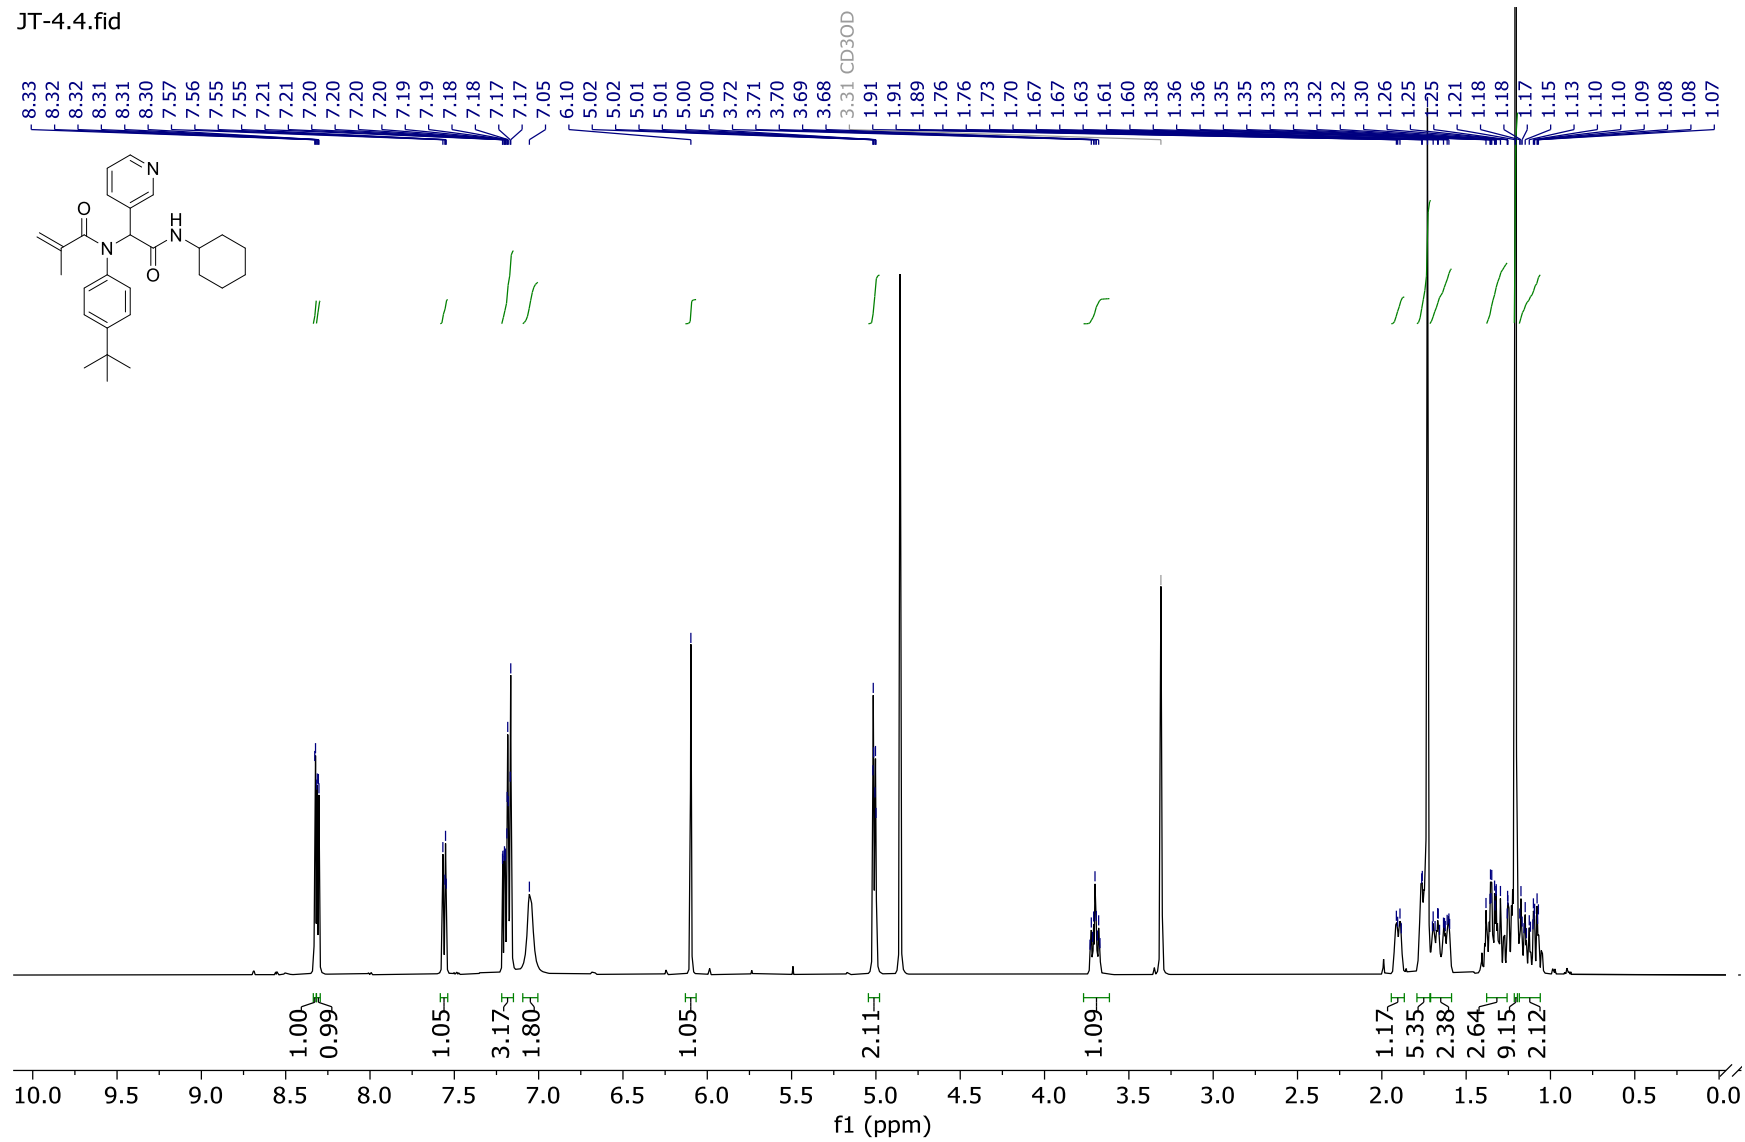

26. Compound **10a** <sup>13</sup>C NMR

JT-4.10.fid

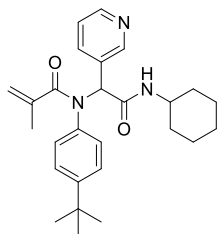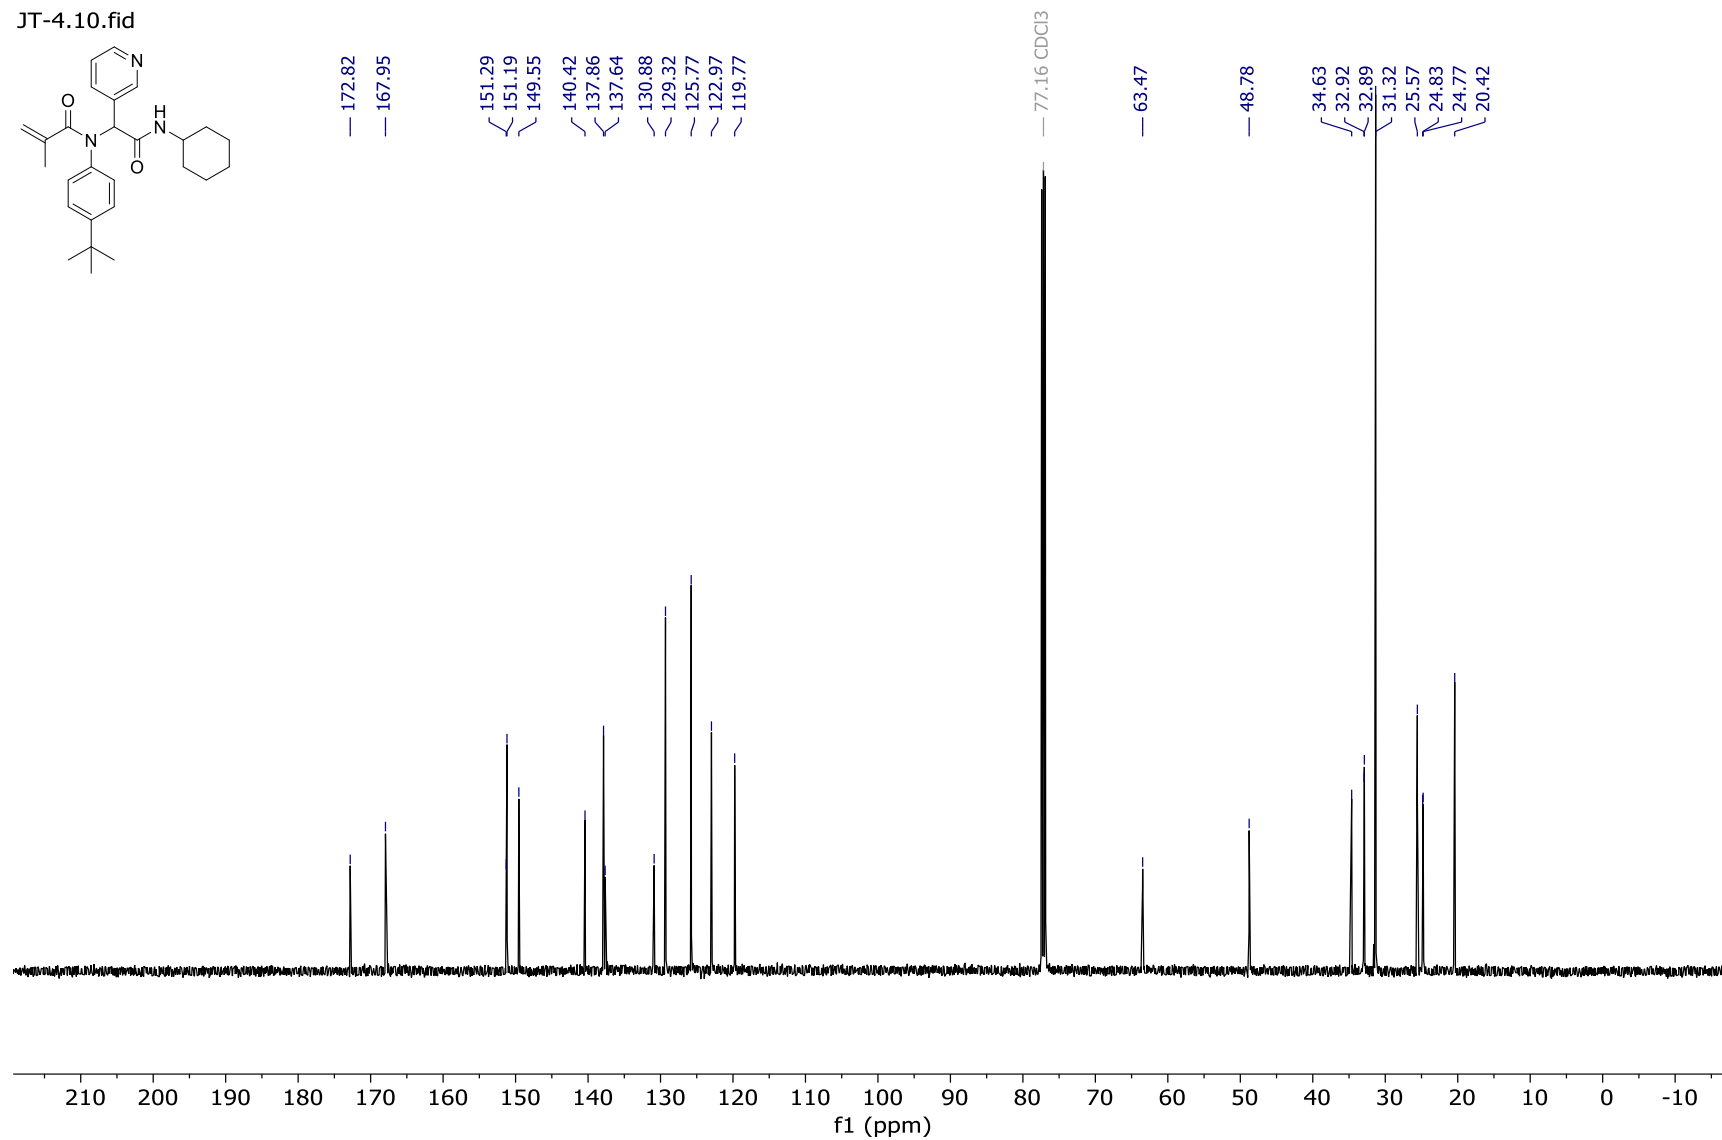

27. Compound 11a <sup>1</sup>H NMR

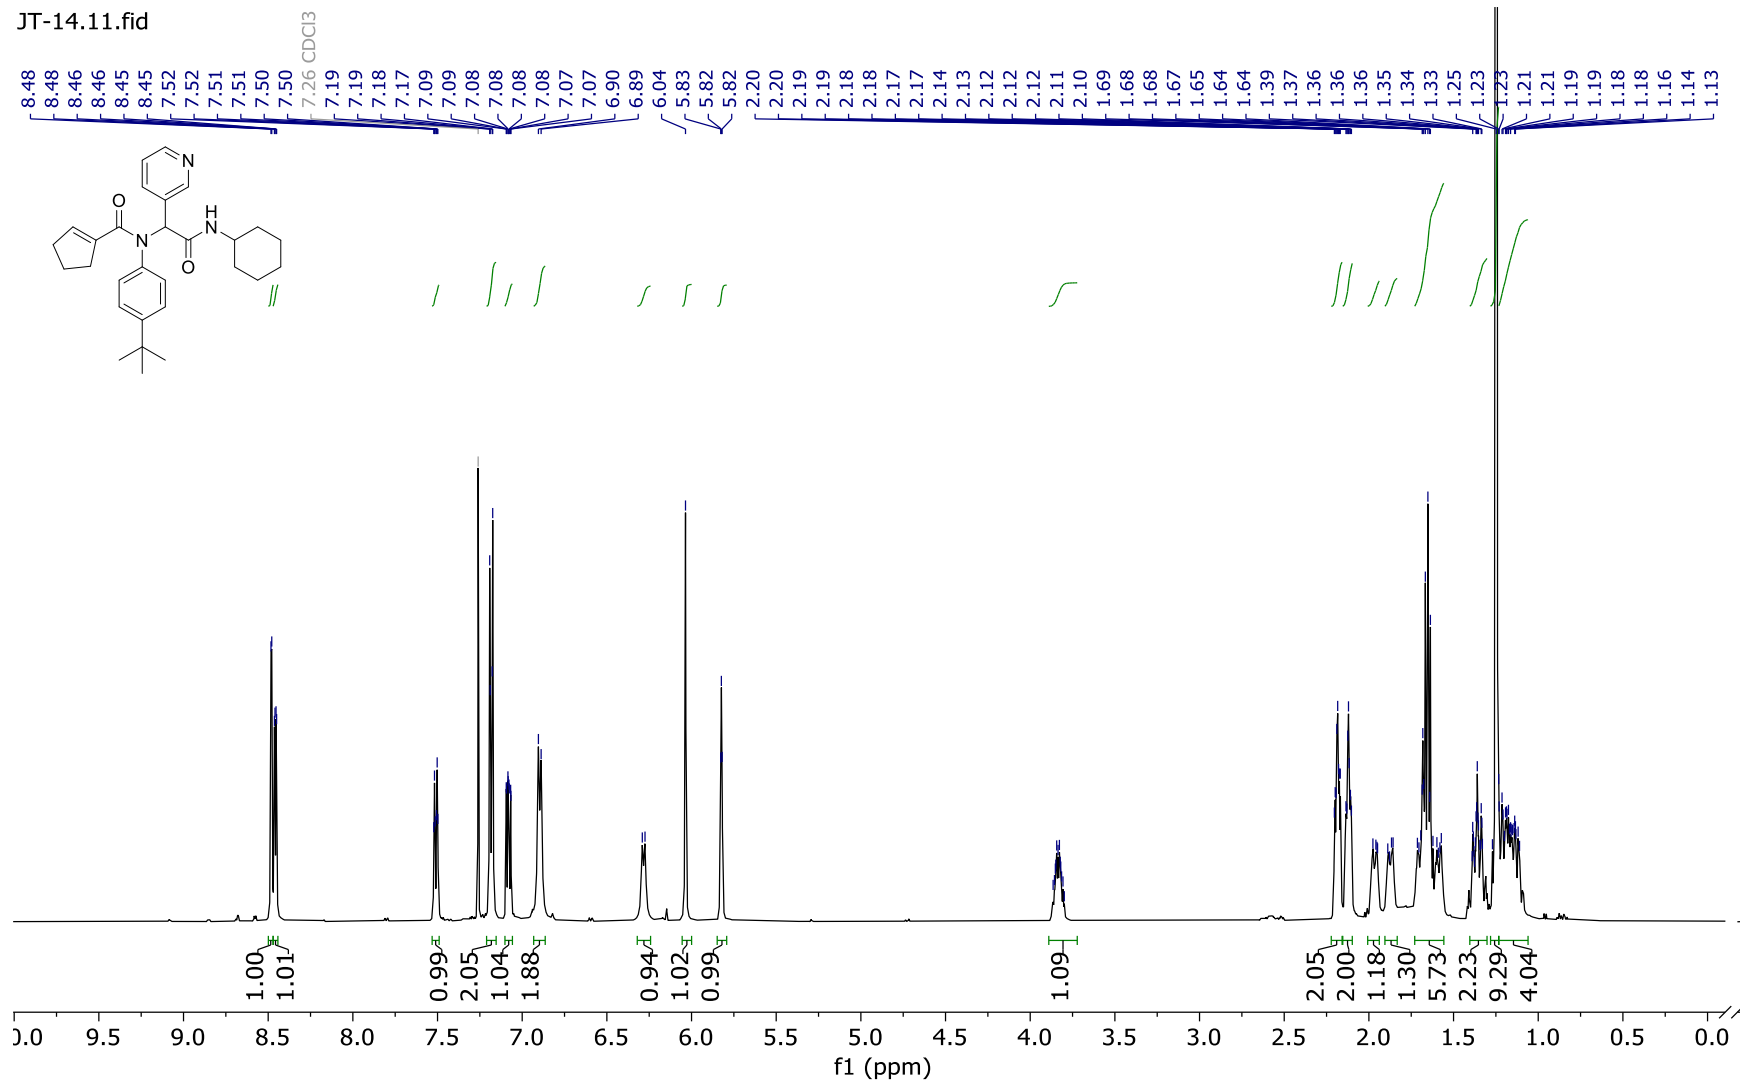

28. Compound **11a** <sup>13</sup>C NMR

JT-14.12.fid

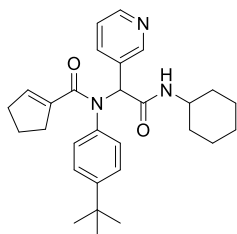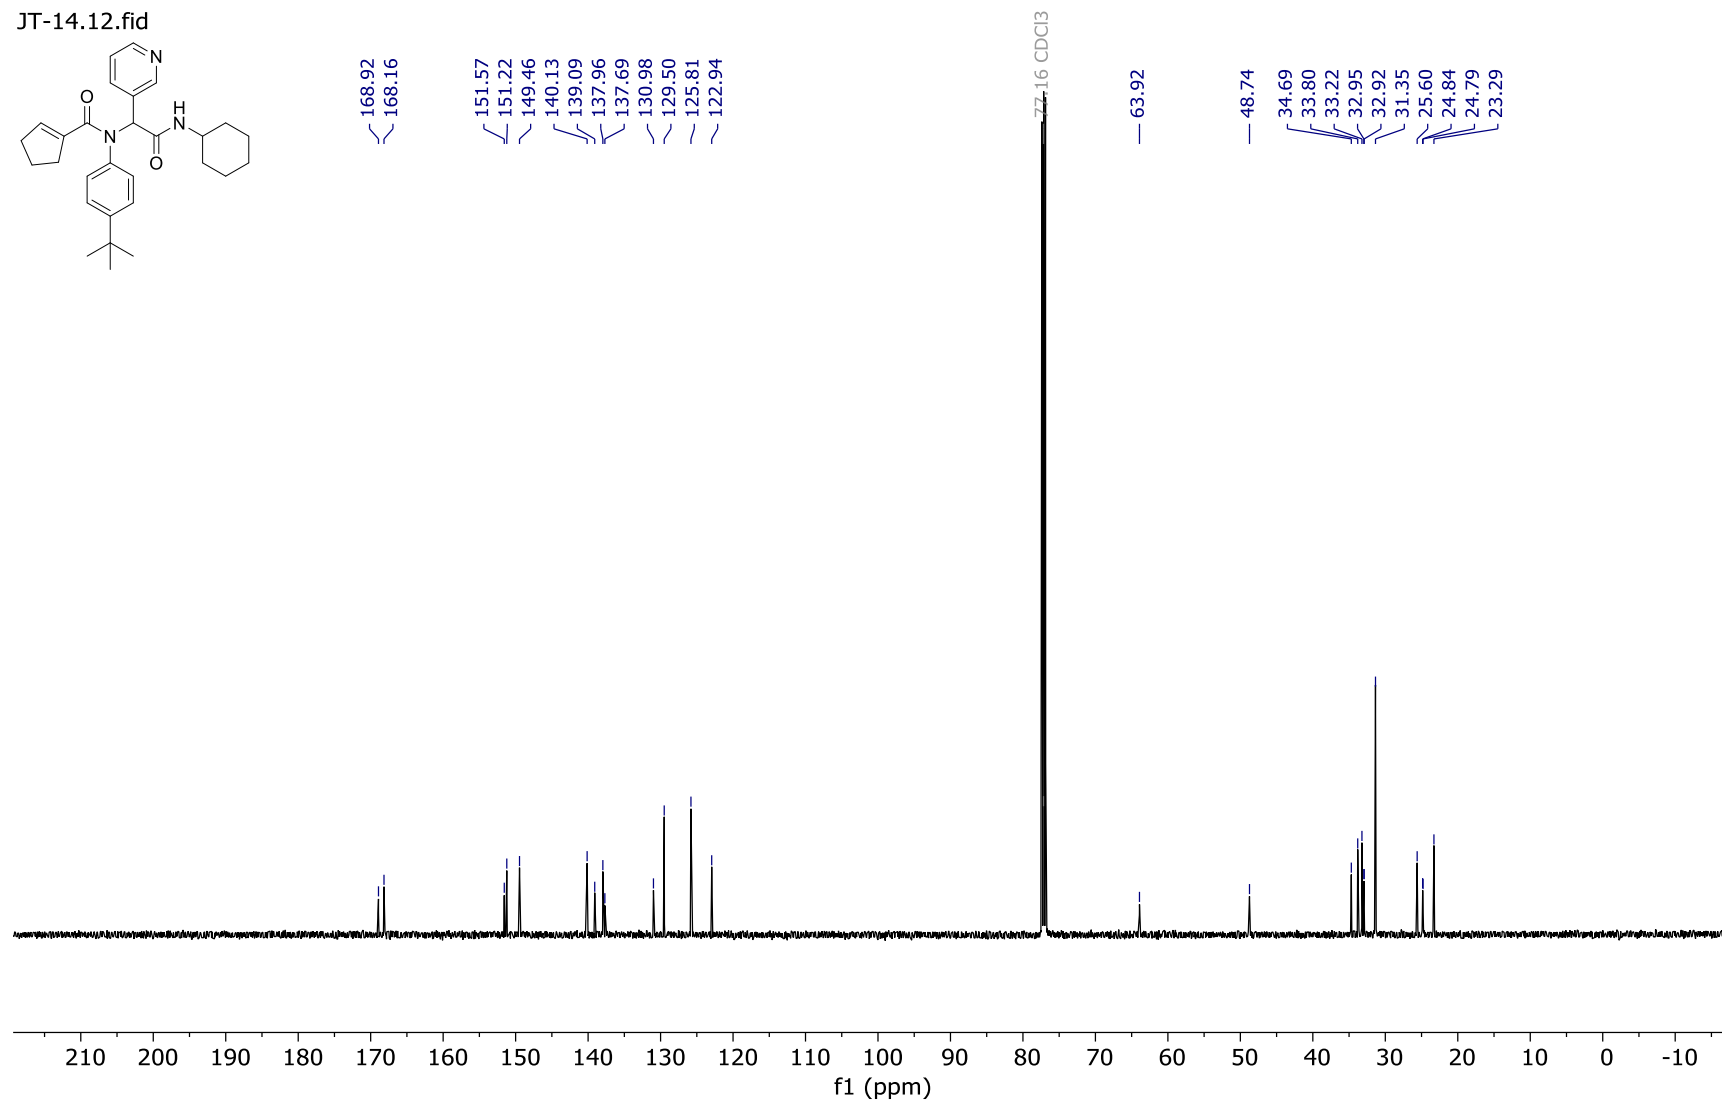



29. Compound **11b** <sup>1</sup>H NMR

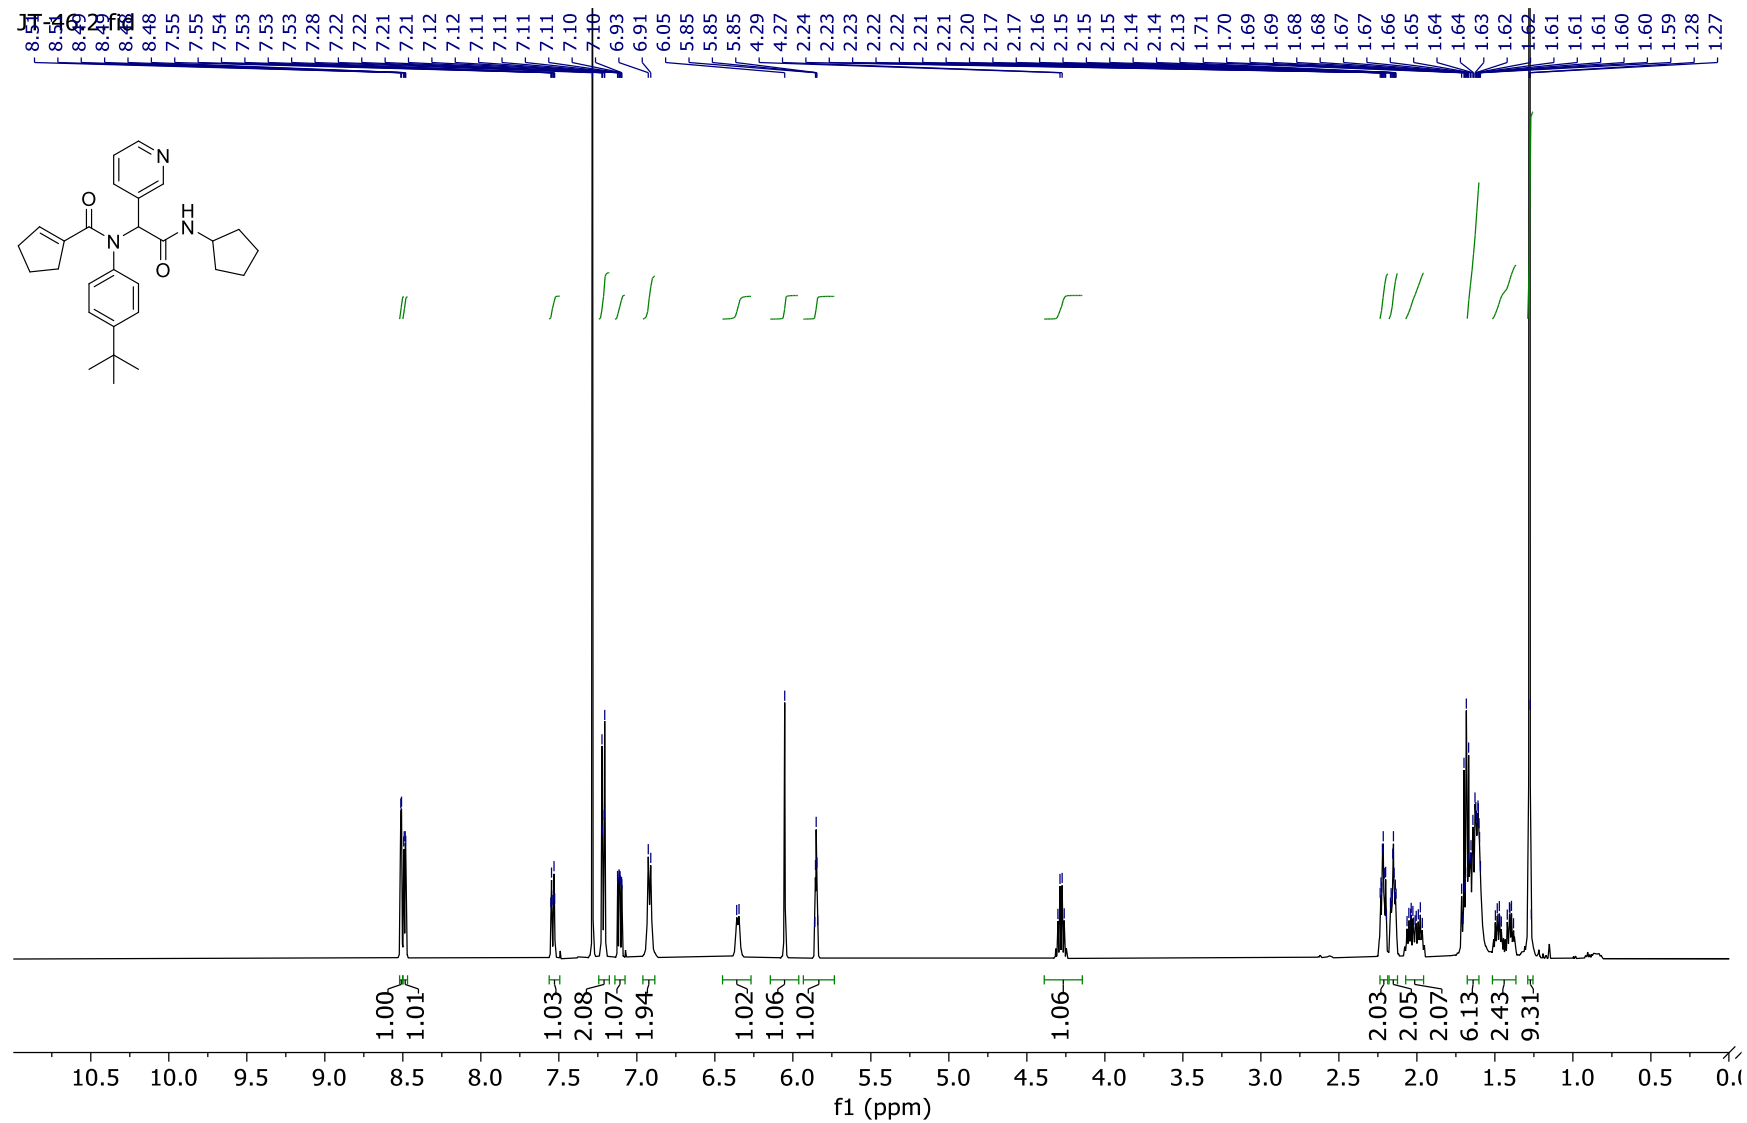

### 30. Compound **11b** <sup>13</sup>C NMR

JT-46.3.fid

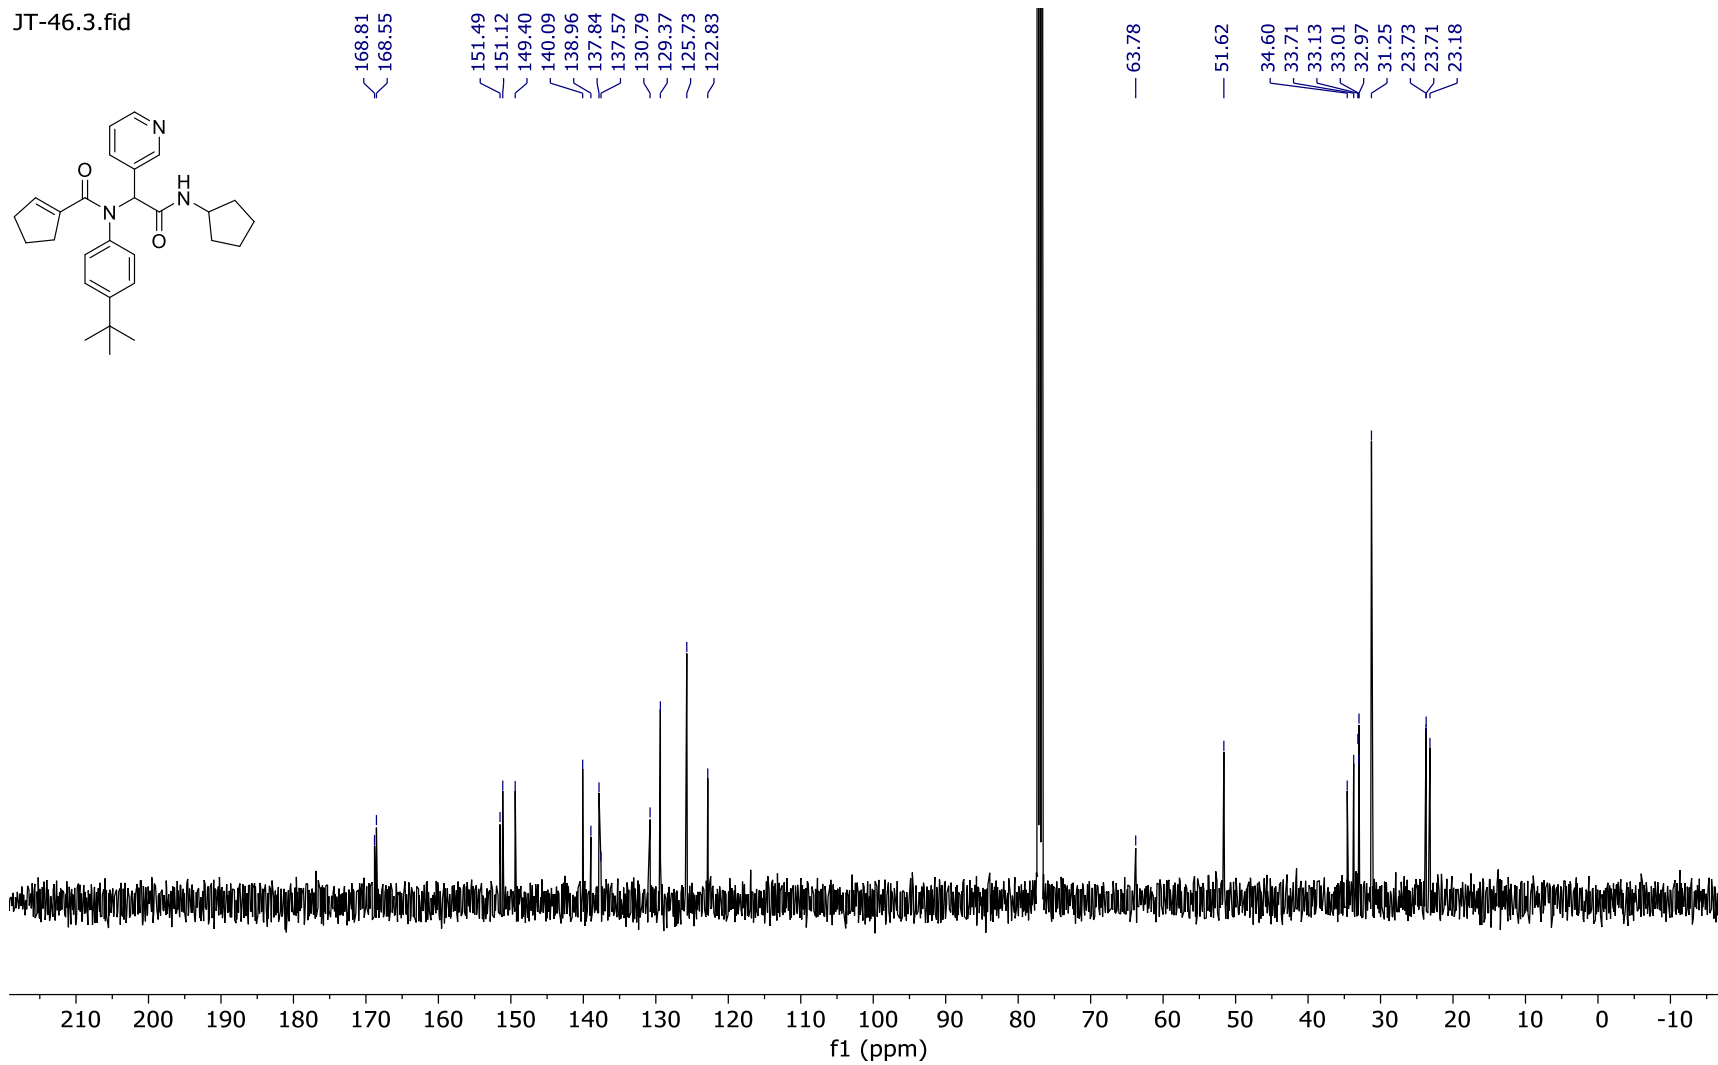

31. Compound **11c** <sup>1</sup>H NMR

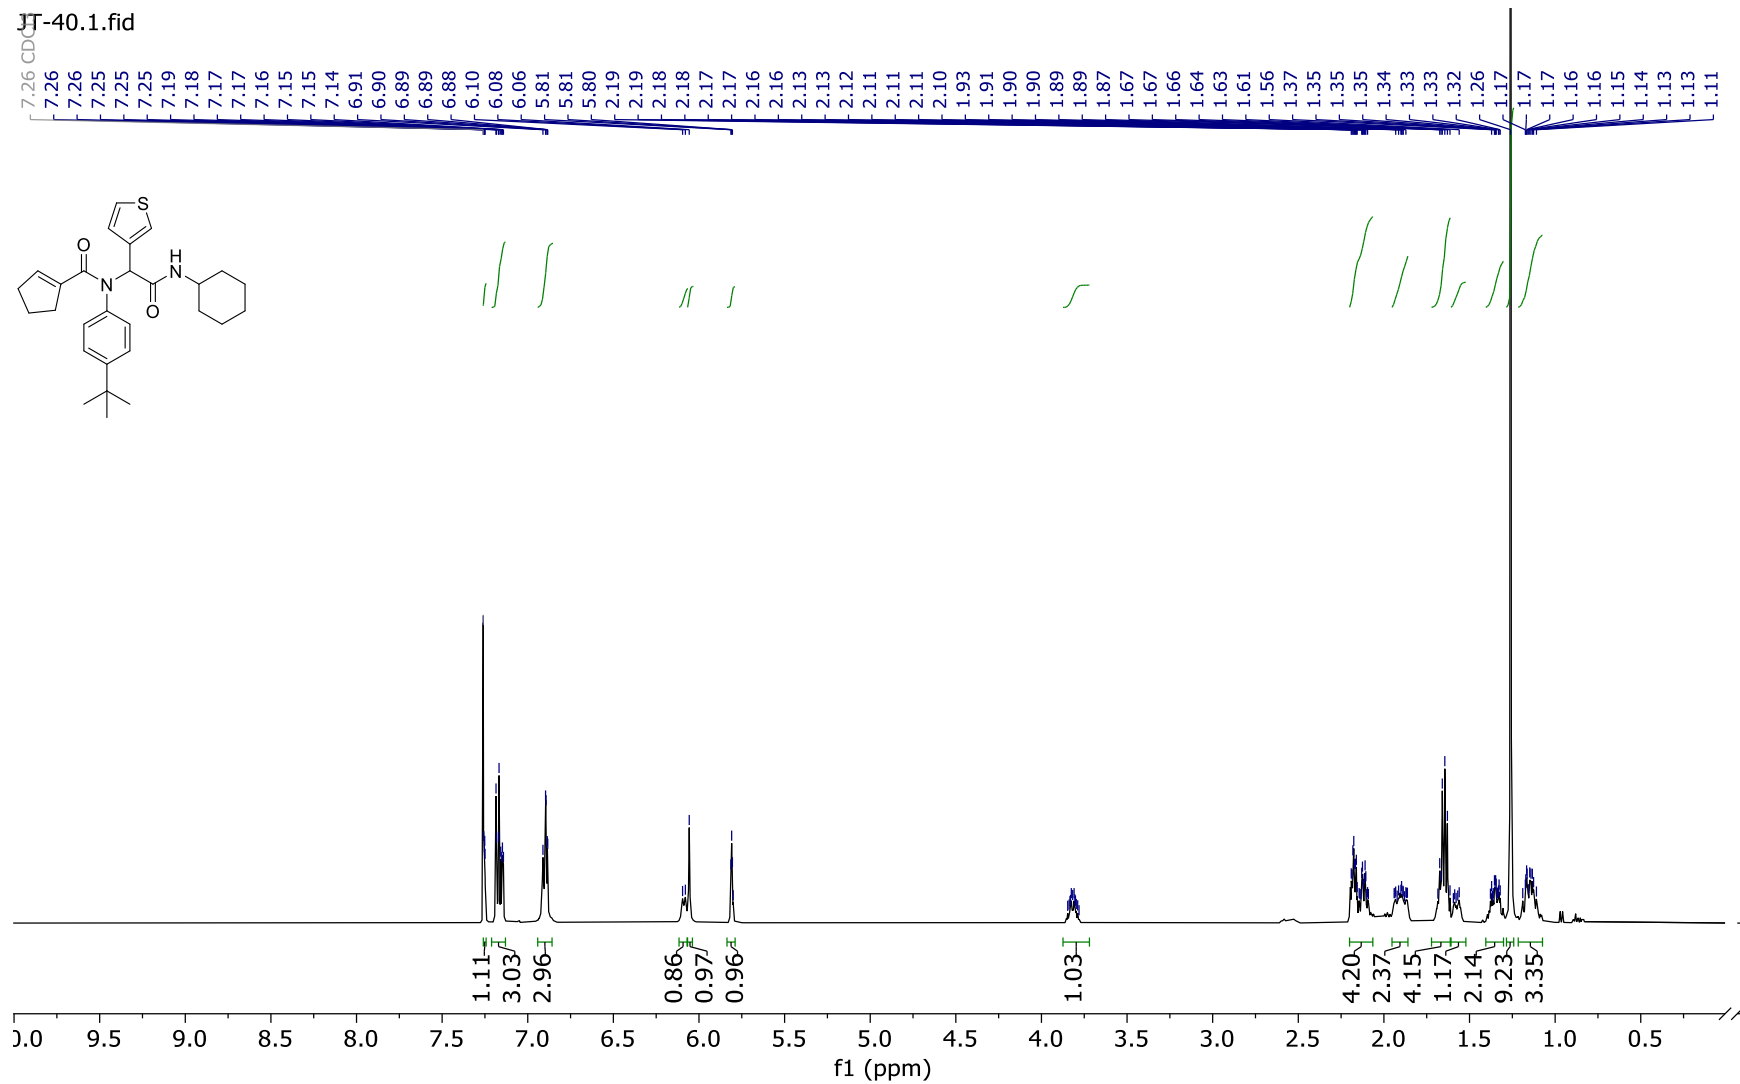

32. Compound **11c** <sup>13</sup>C NMR

JT-40.6.fid

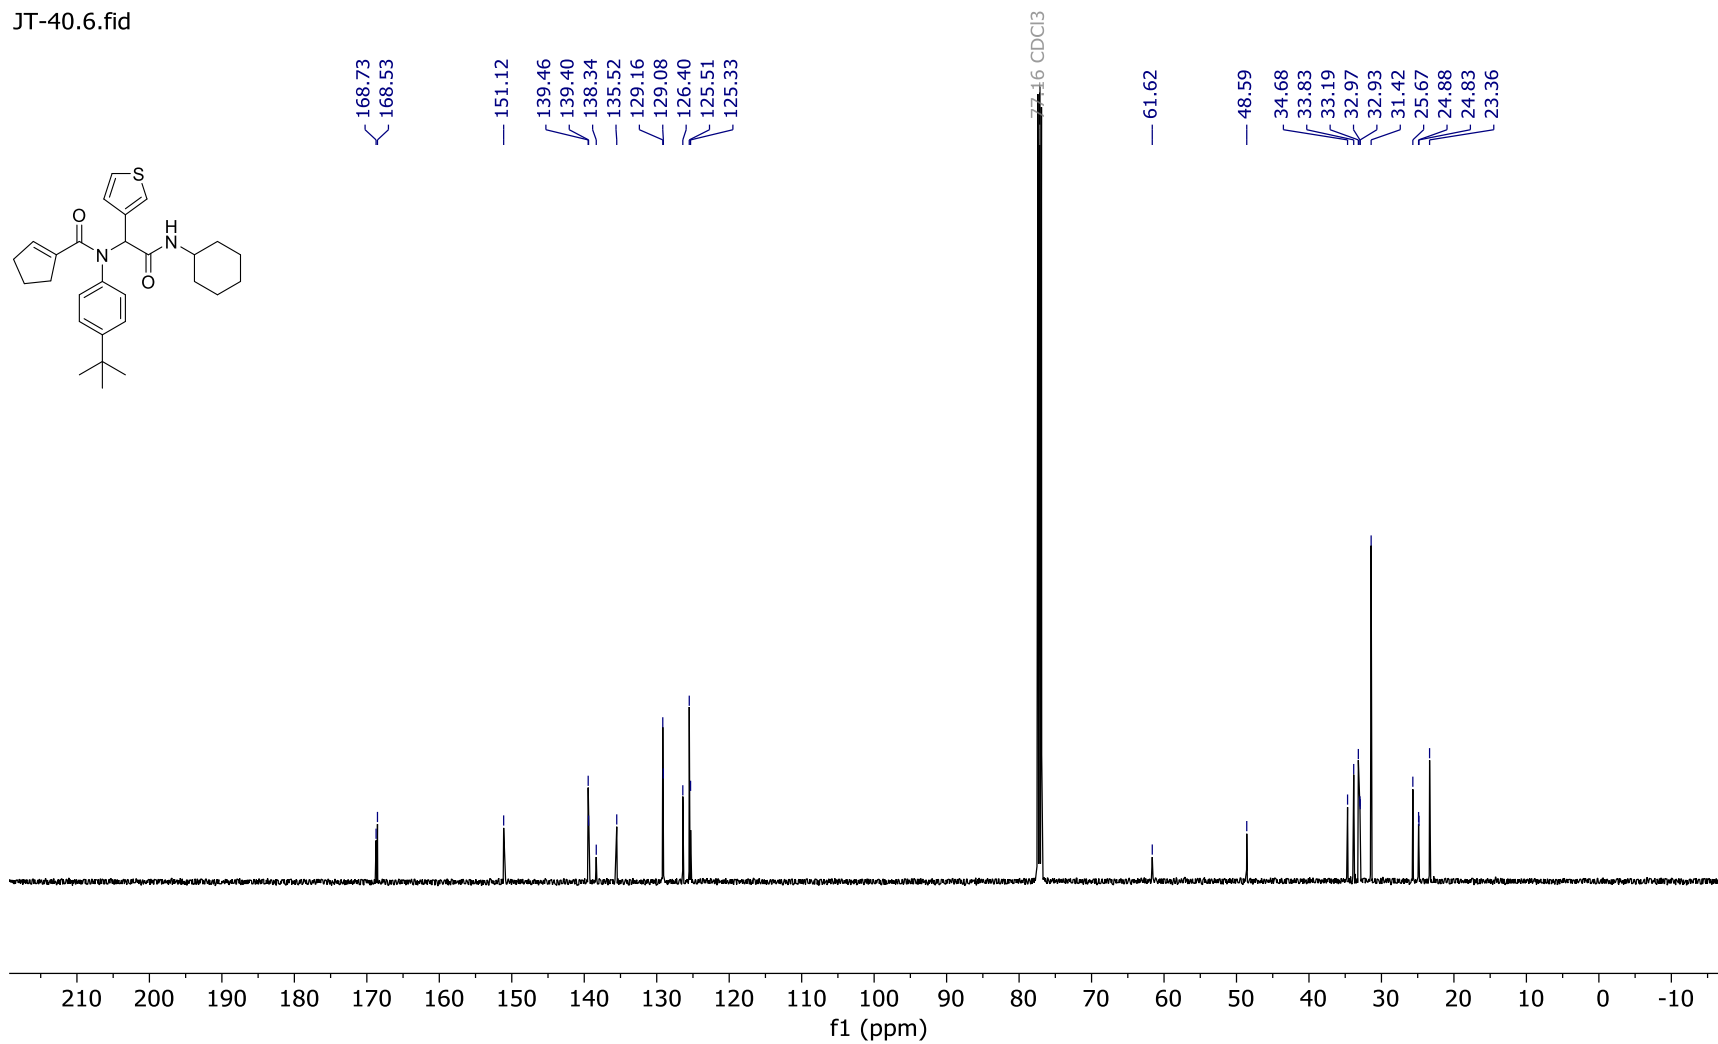

33. Compound **11d** <sup>1</sup>H NMR

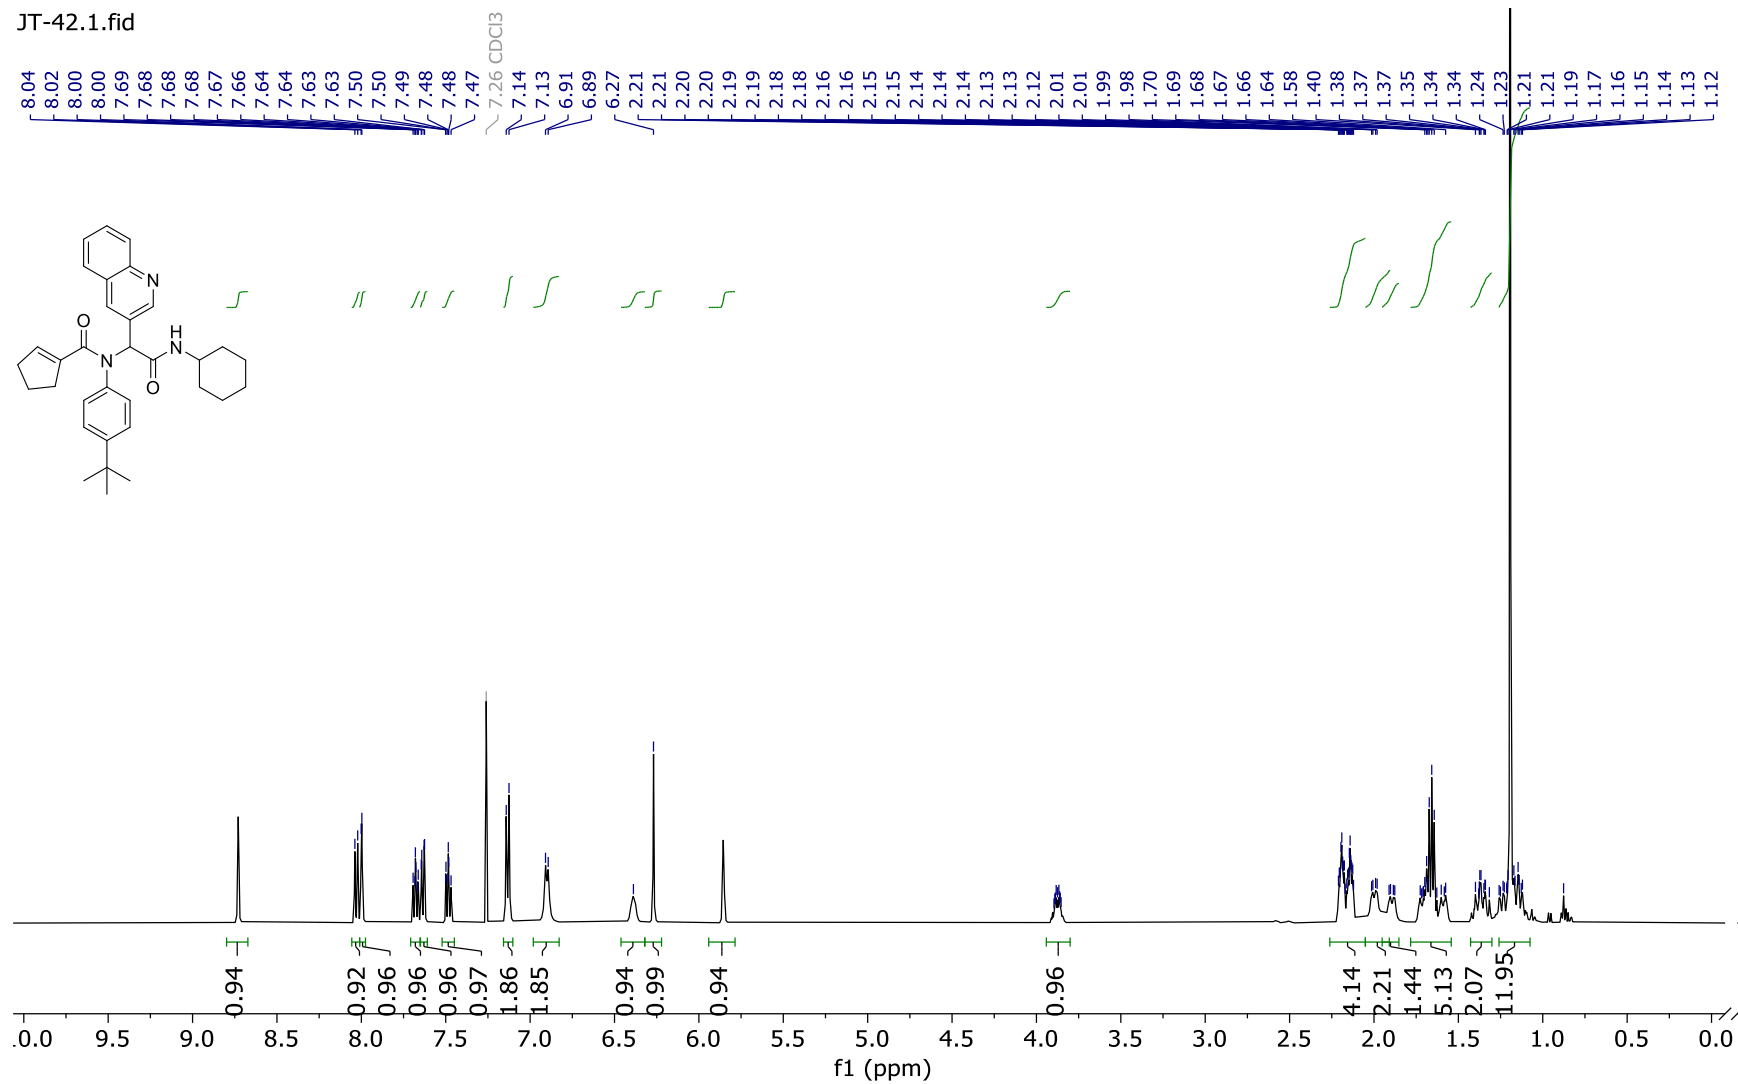

34. Compound **11d** <sup>13</sup>C NMR

JT-42.2.fid

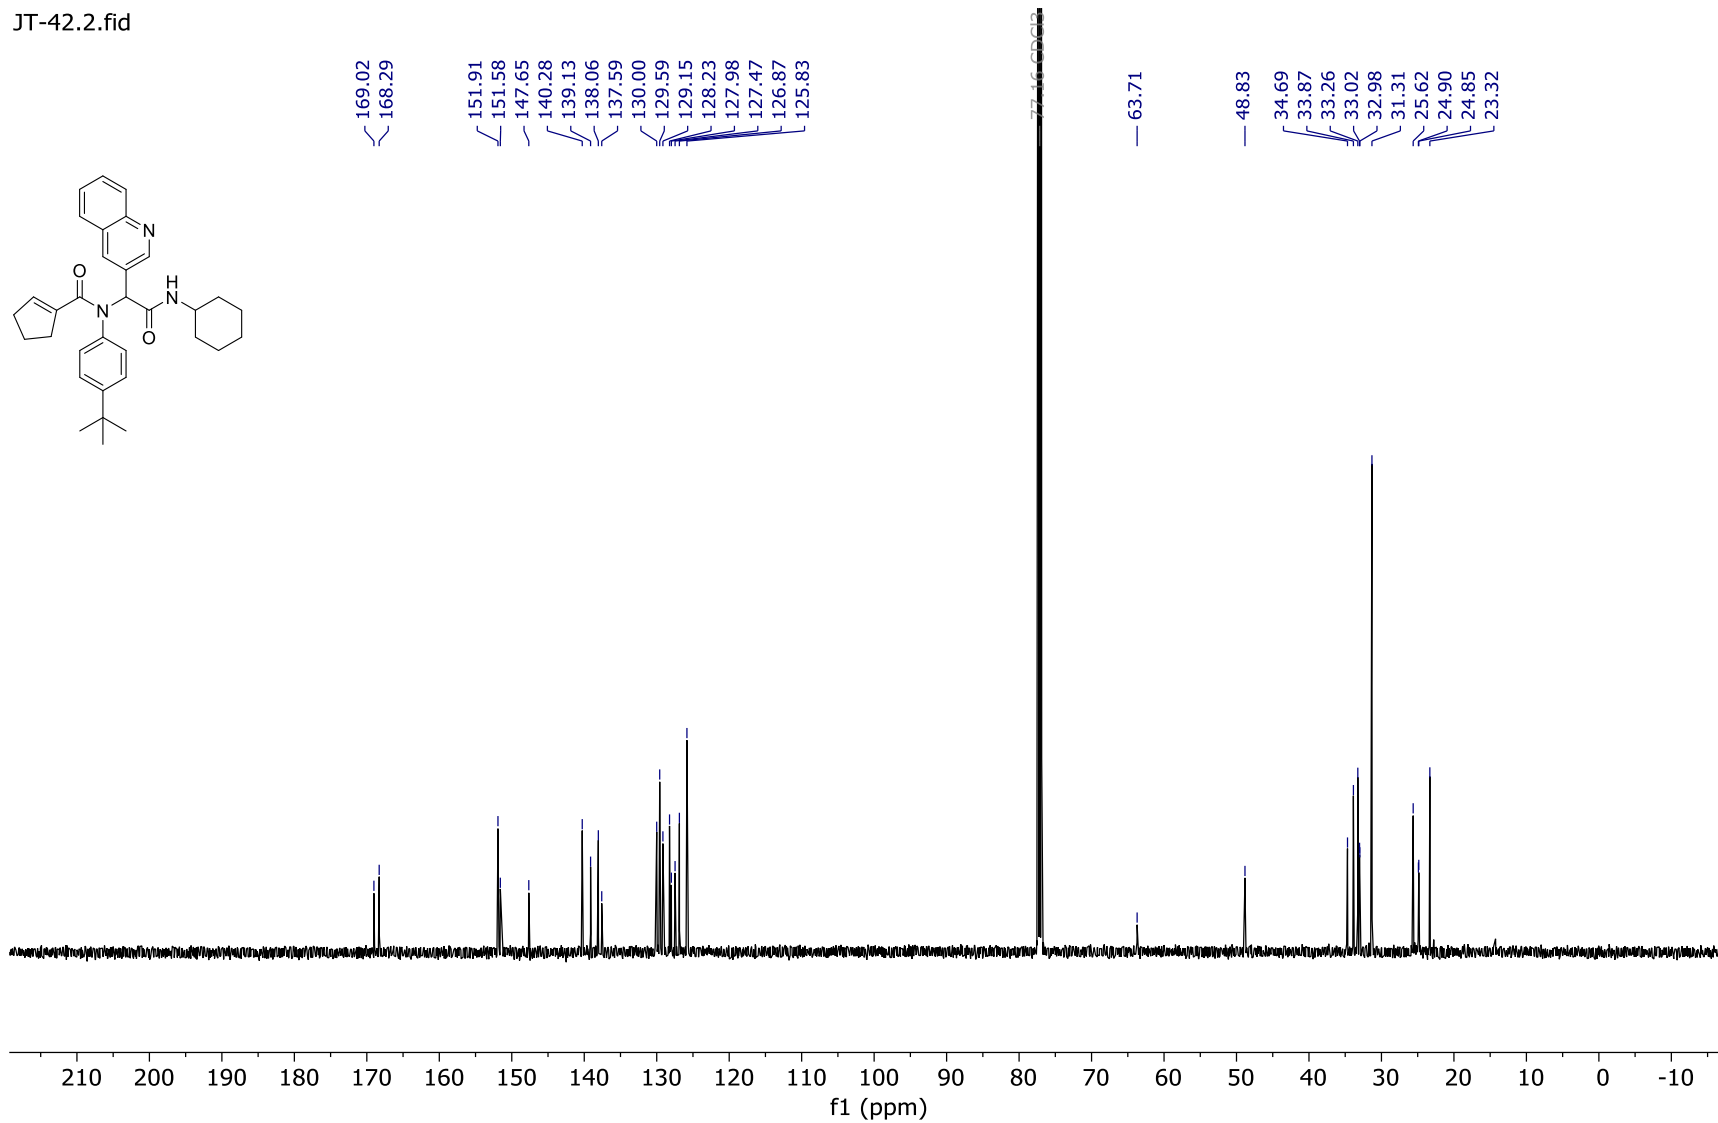

35. Compound **11e** <sup>1</sup>H NMR

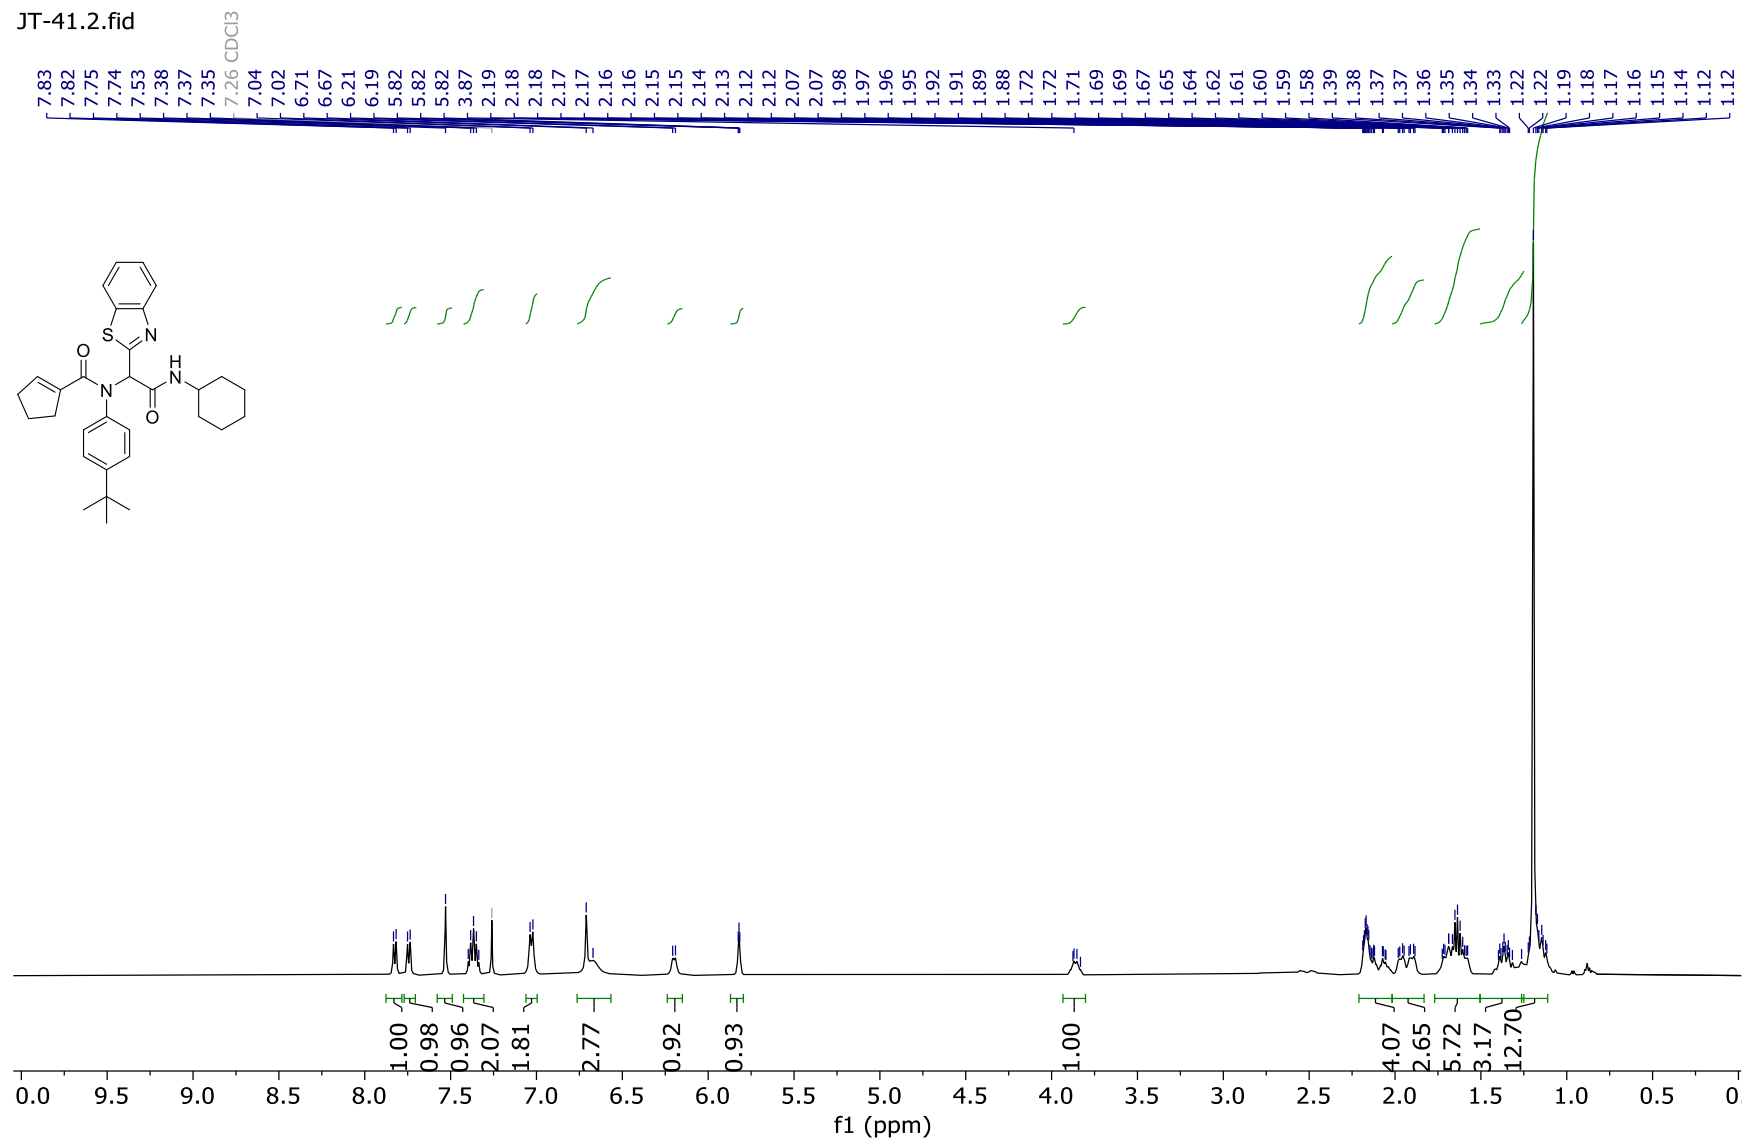

36. Compound **11e** <sup>13</sup>C NMR

JT-41.4.fid

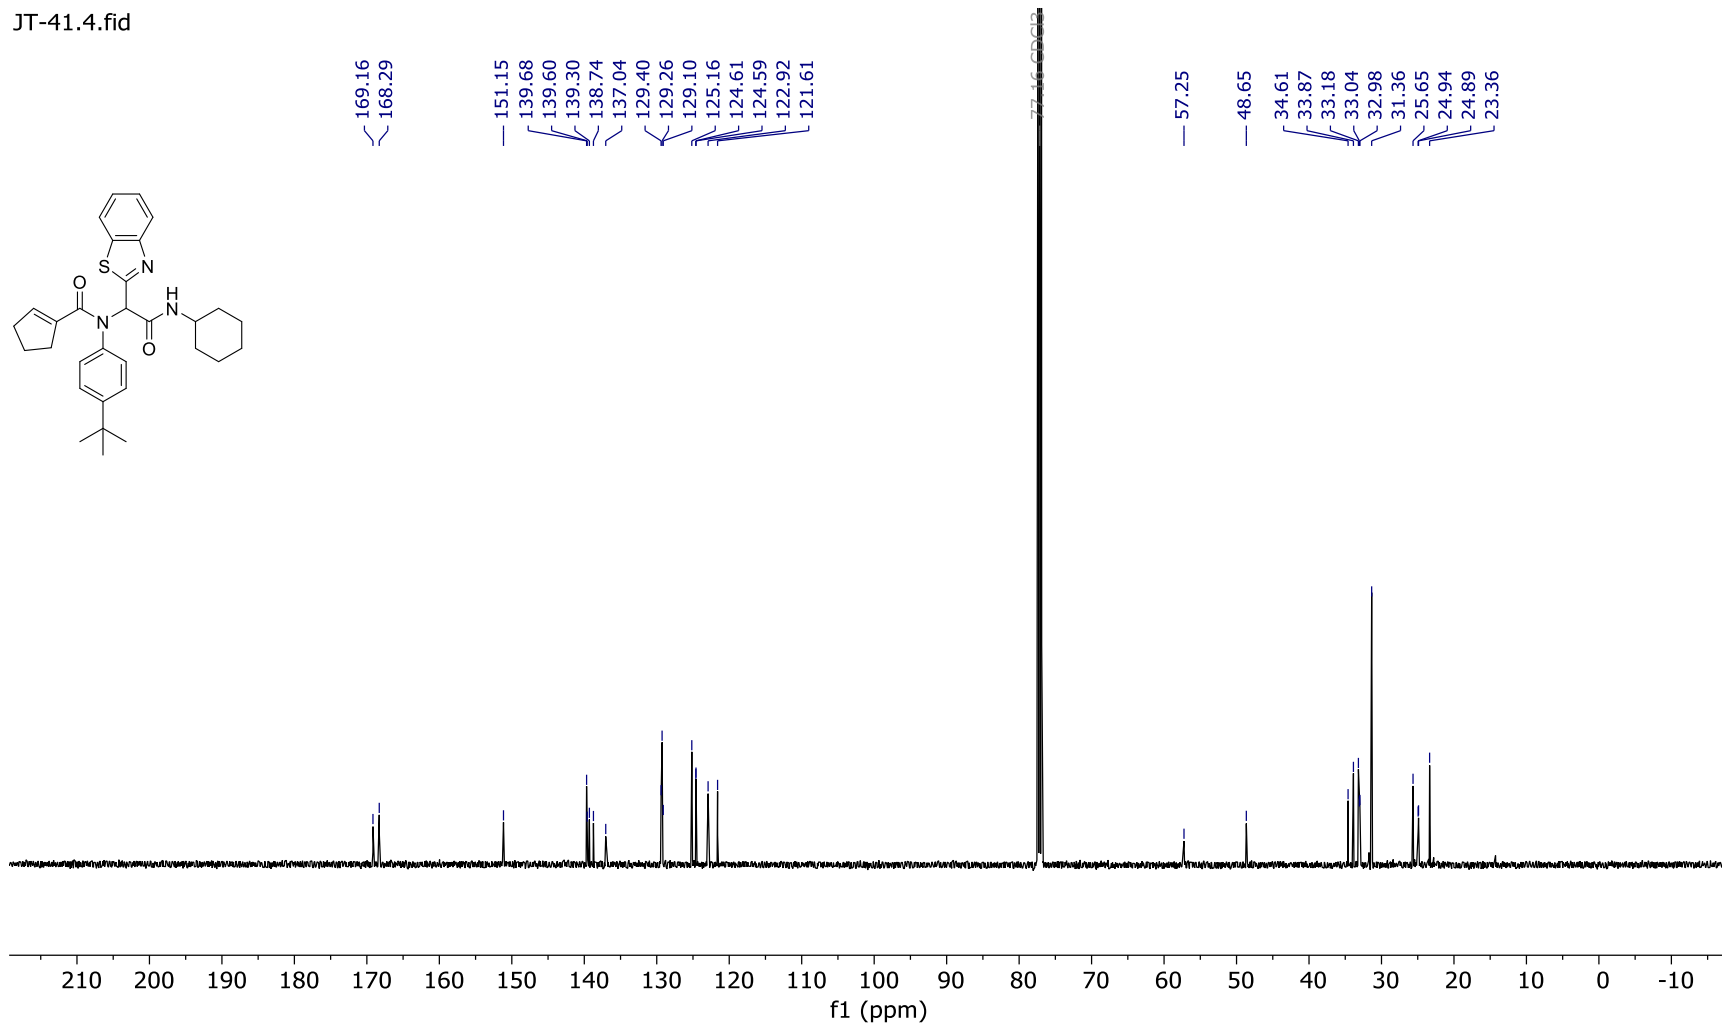



37. Compound **11f** <sup>1</sup>H NMR

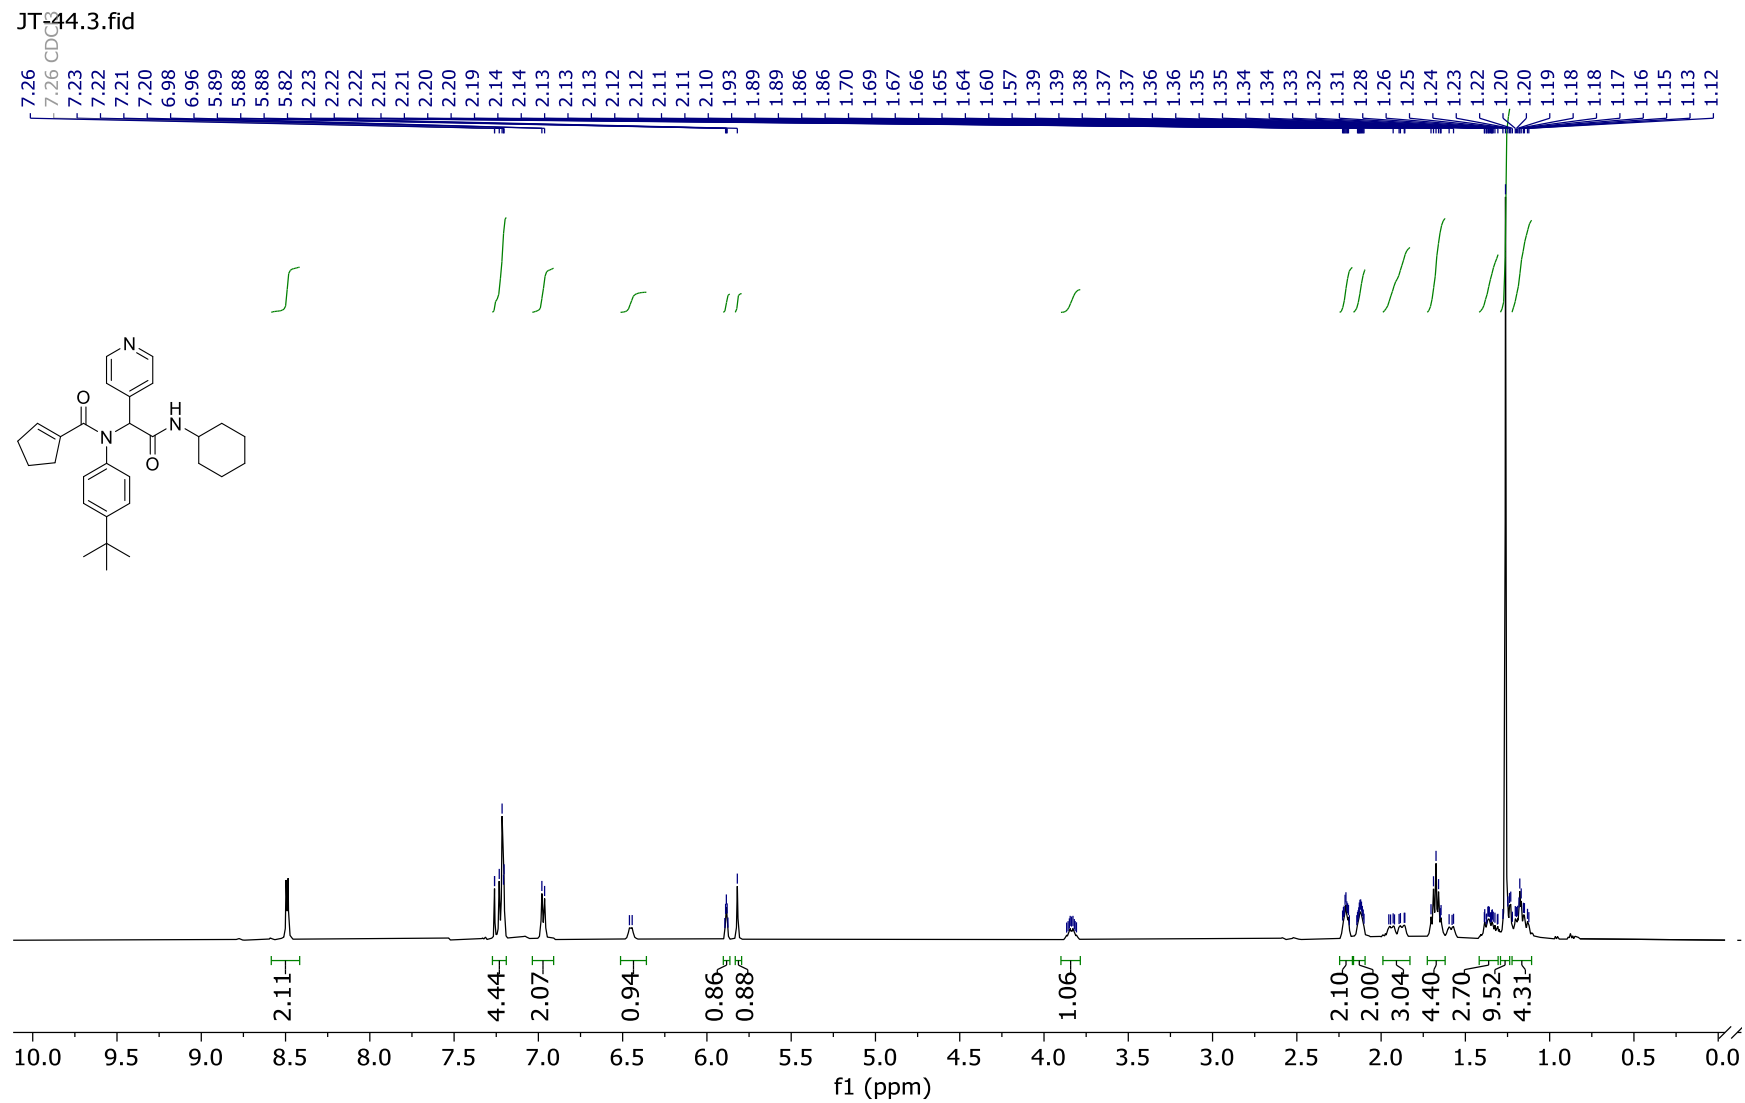

38. Compound **11f** <sup>13</sup>C NMR

JT-44.5.fid

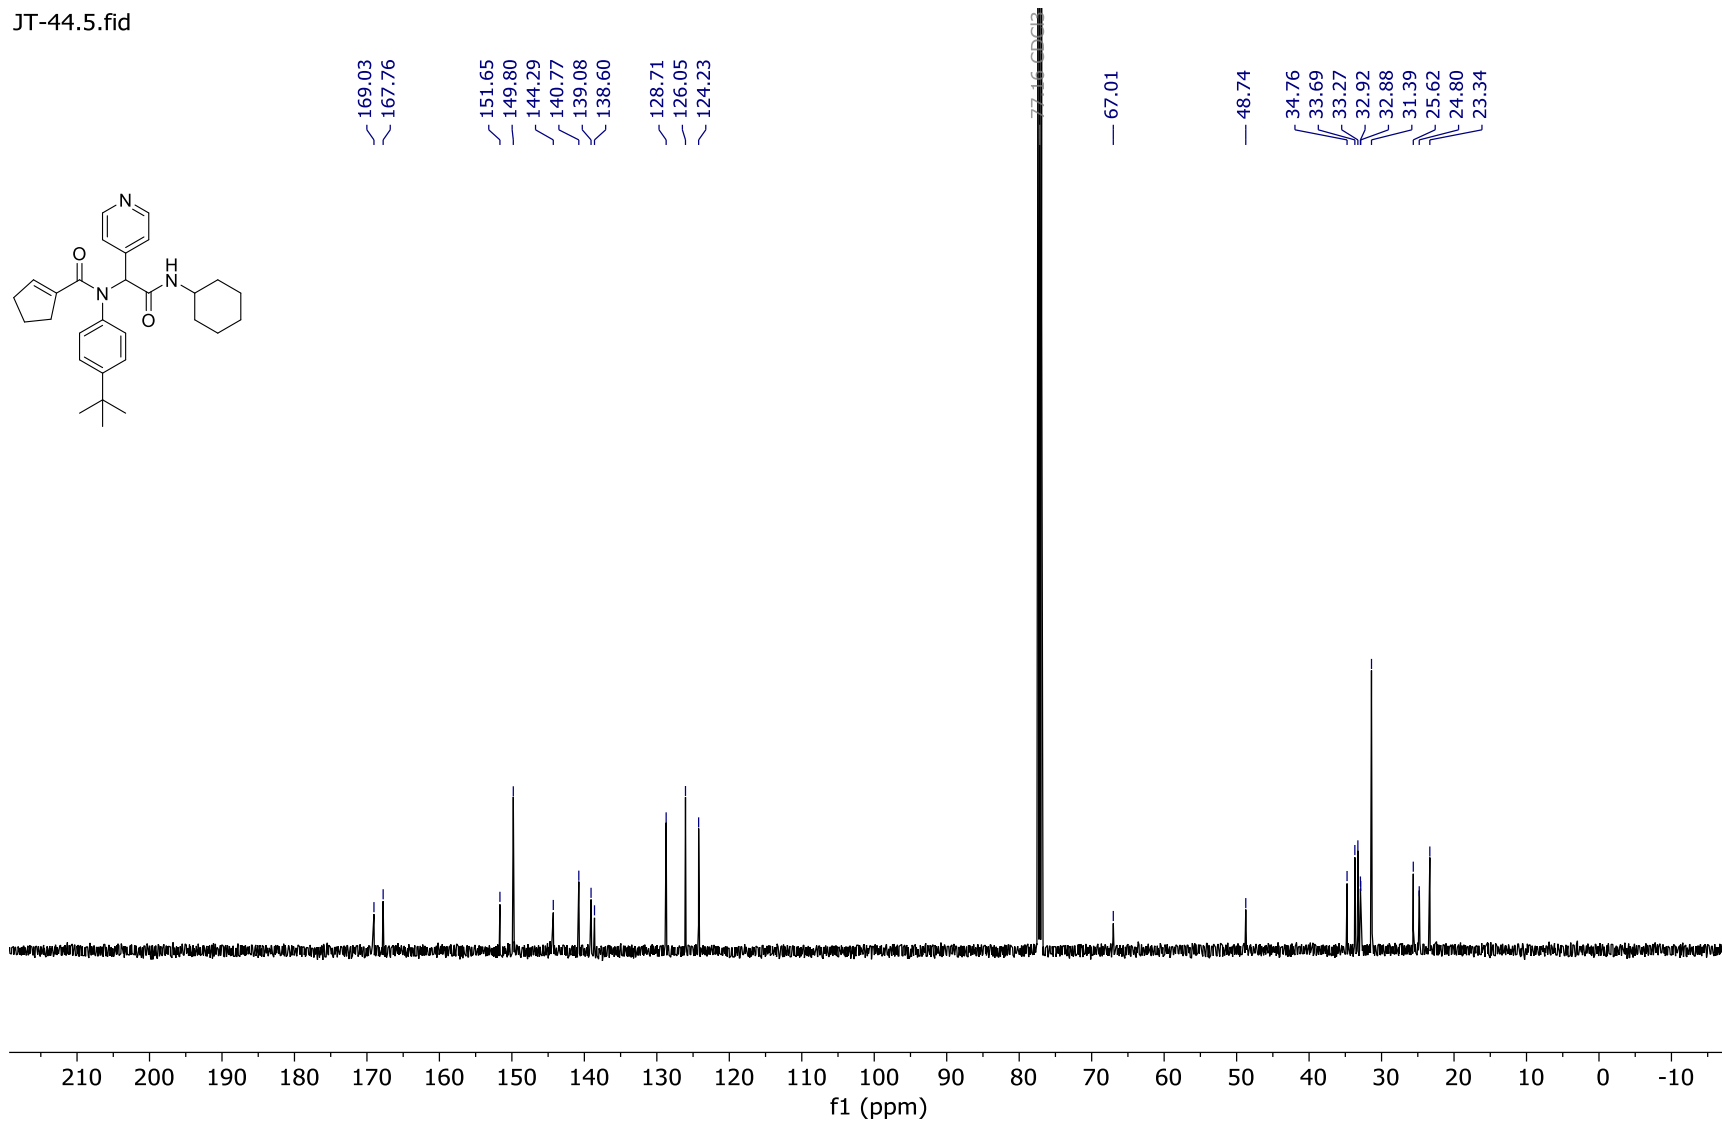

39. Compound **11g** <sup>1</sup>H NMR

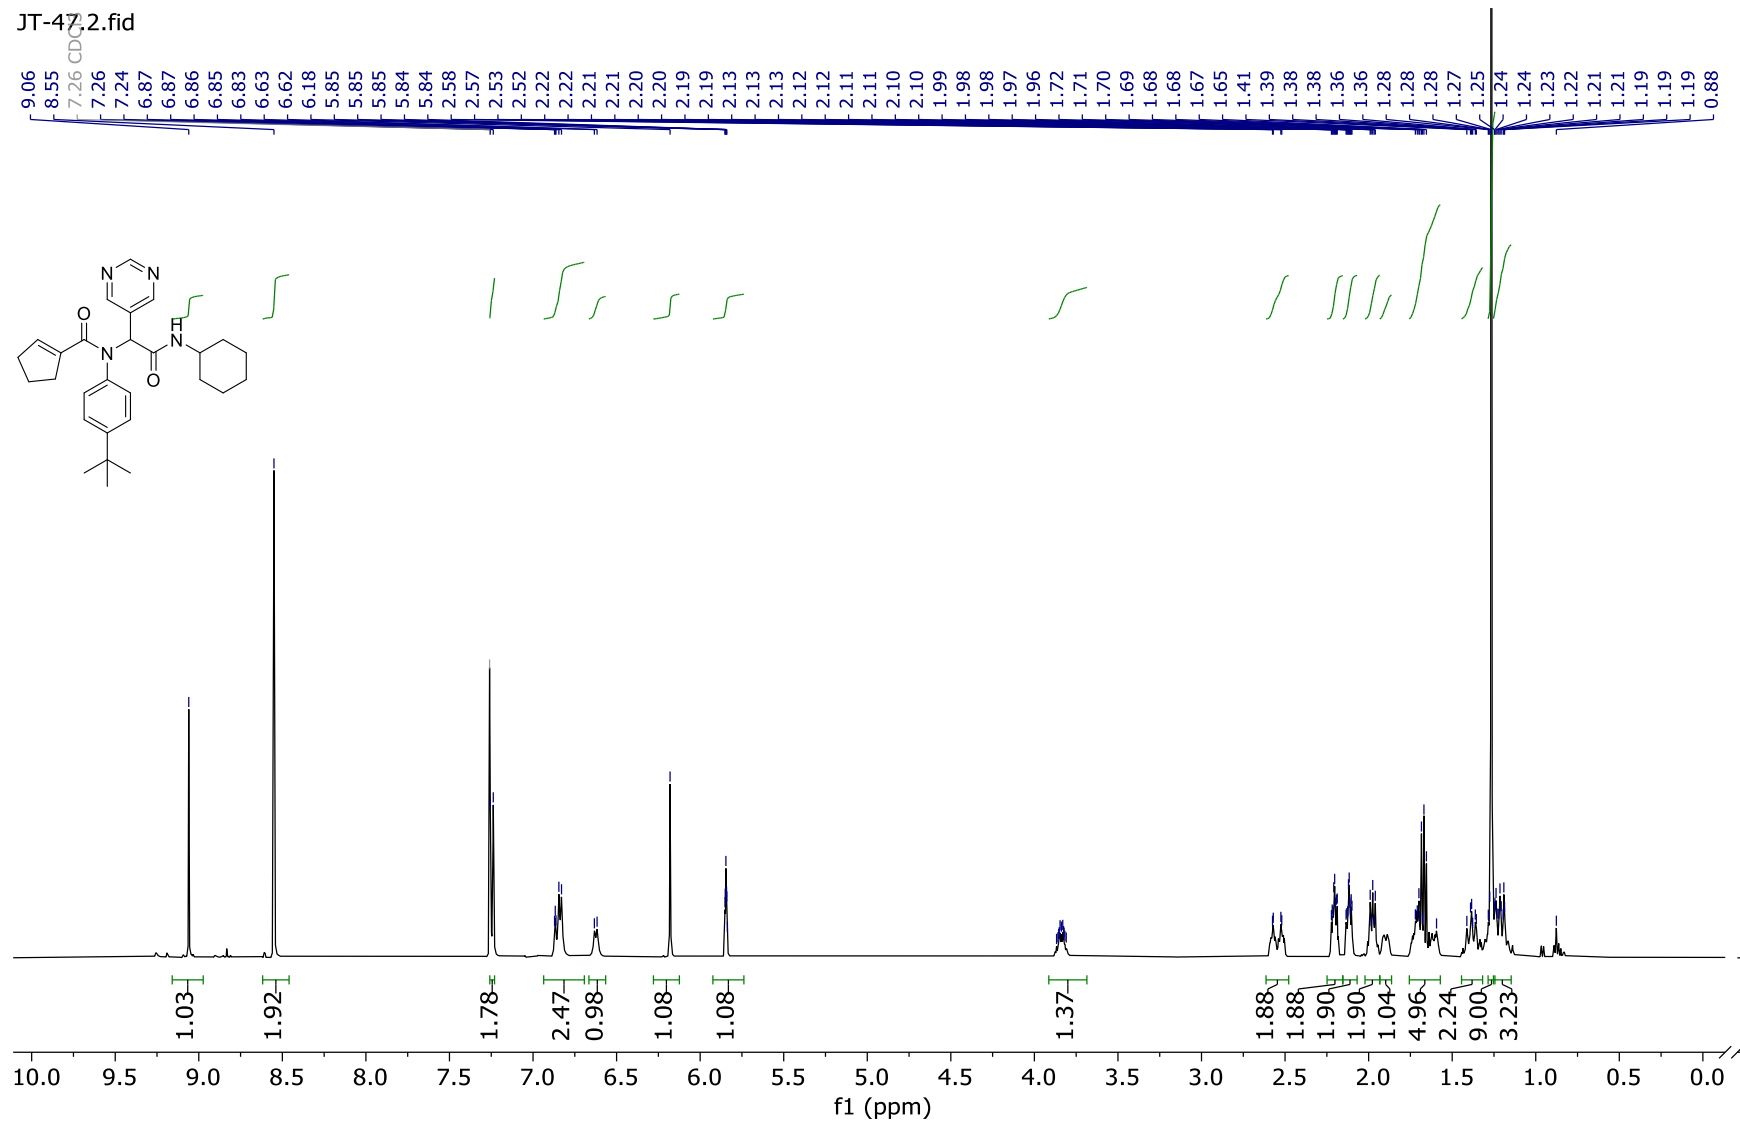

40. Compound **11g** <sup>13</sup>C NMR

JT-47.12.fid

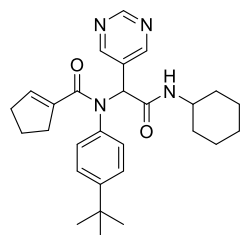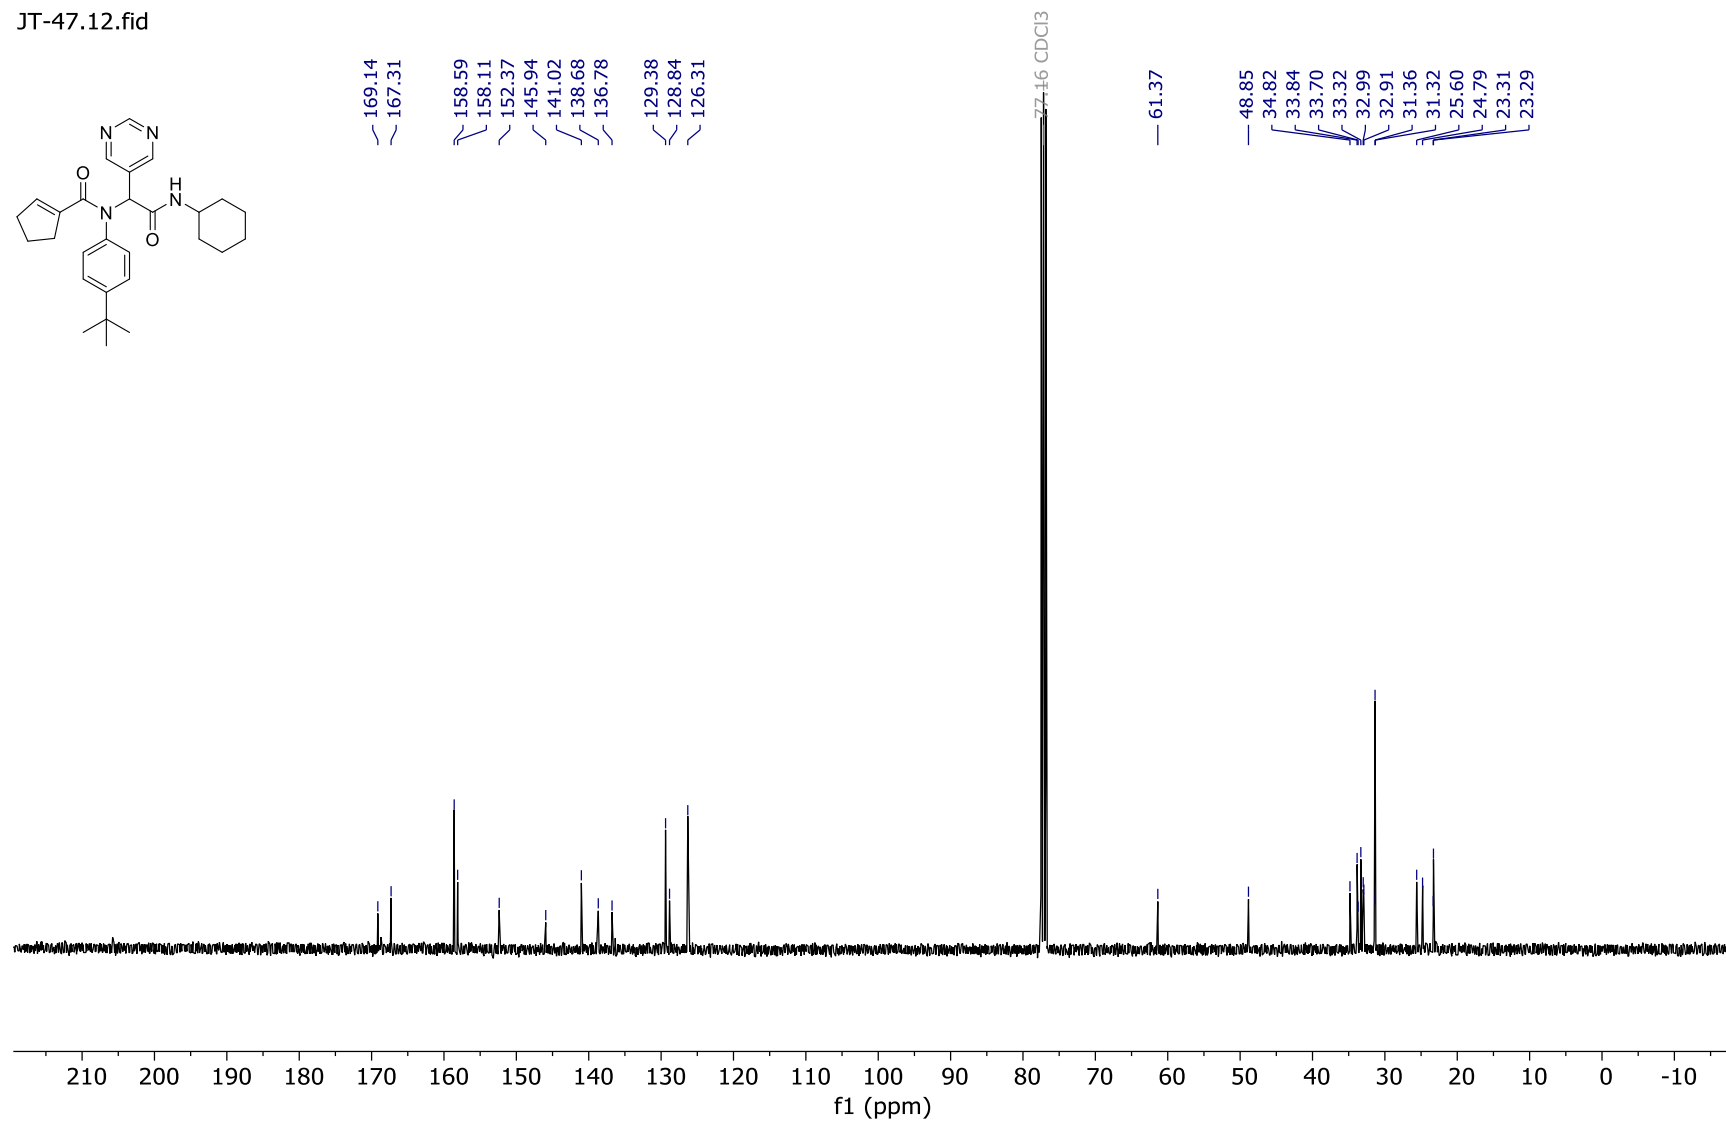

41. Compound **11h** <sup>1</sup>H NMR

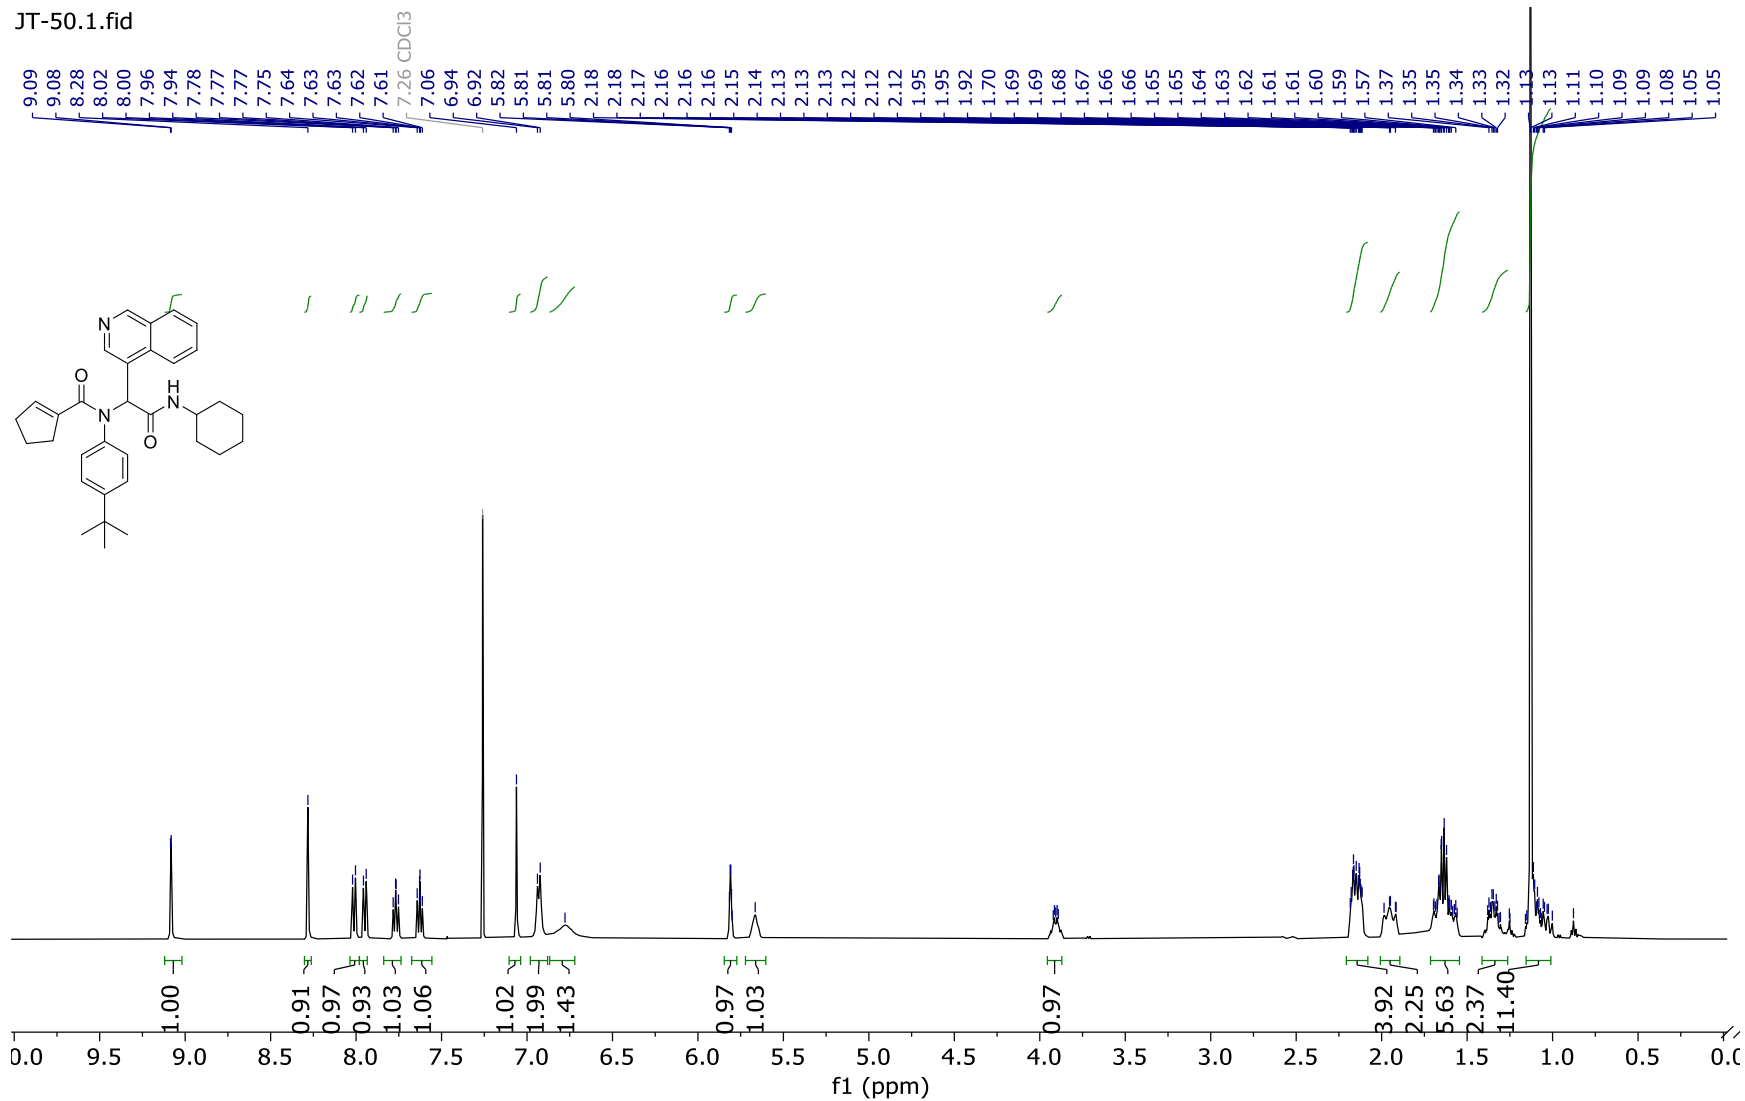

42. Compound **11h** <sup>13</sup>C NMR

JT-50.2.fid

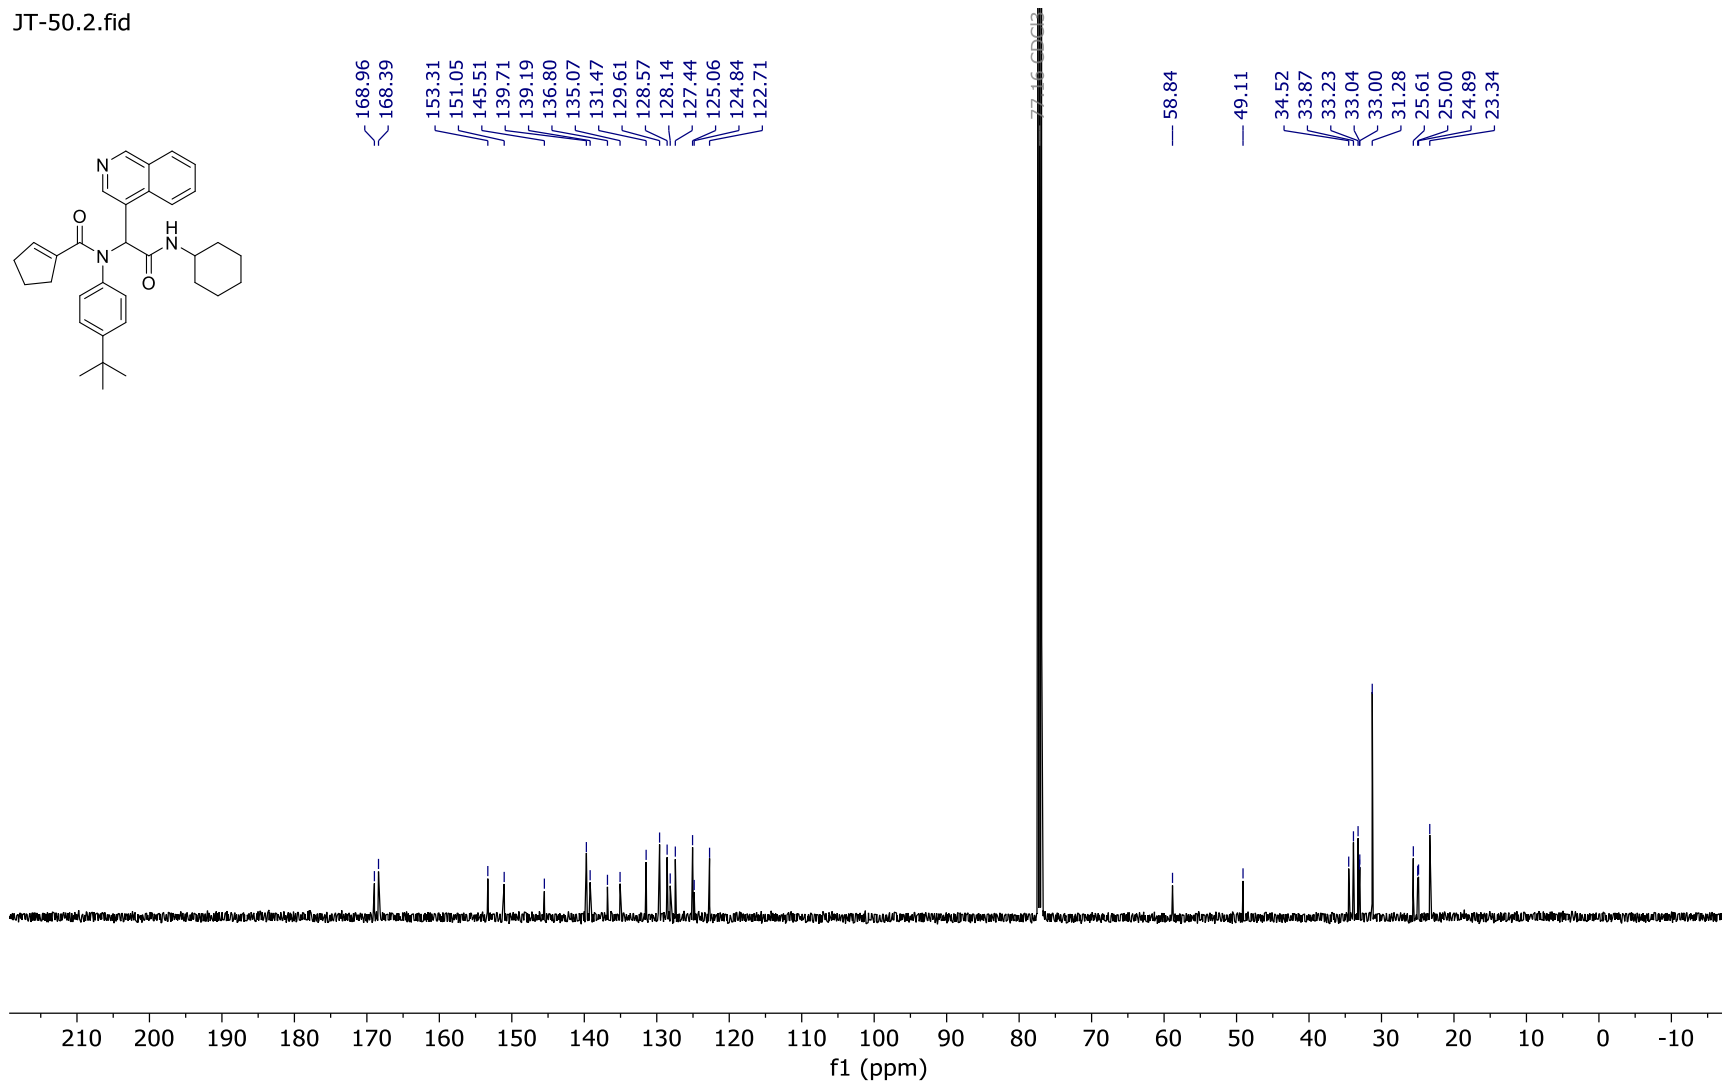

43. Compound 11i <sup>1</sup>H NMR

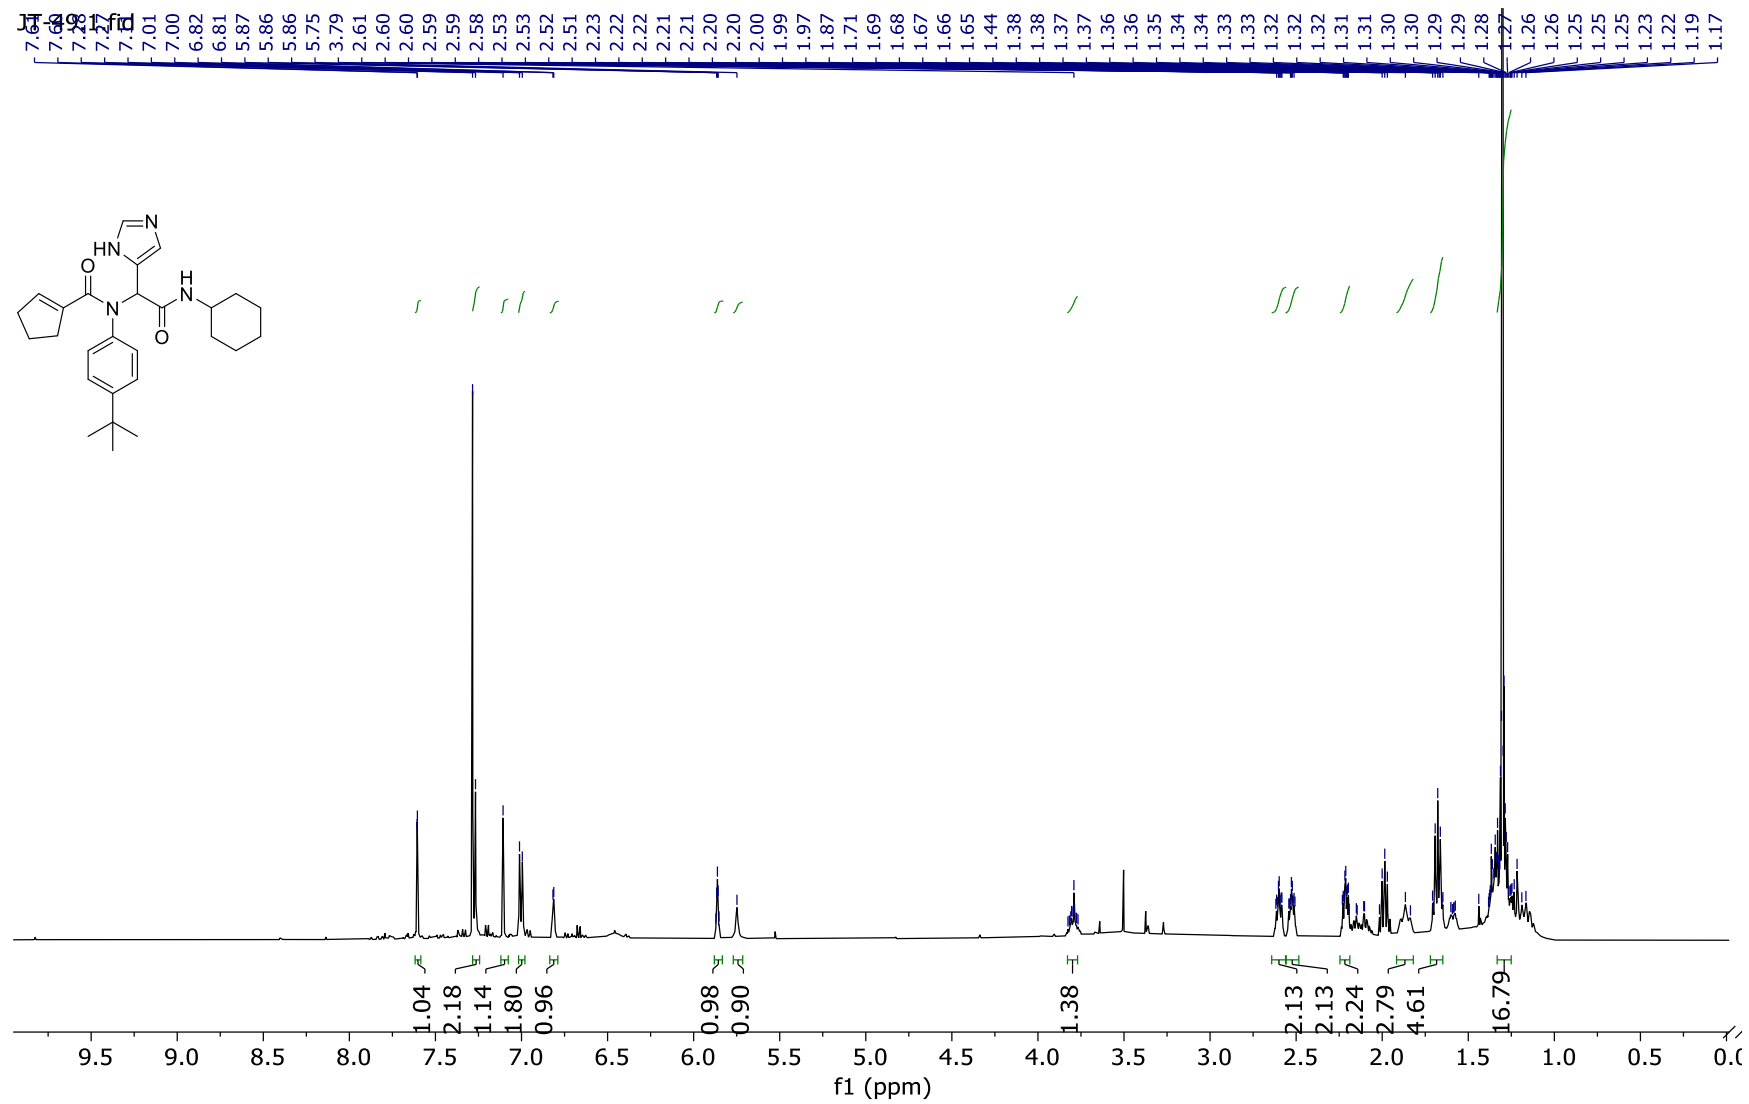

44. Compound **11i** <sup>13</sup>C NMR

JT-49-11.fid

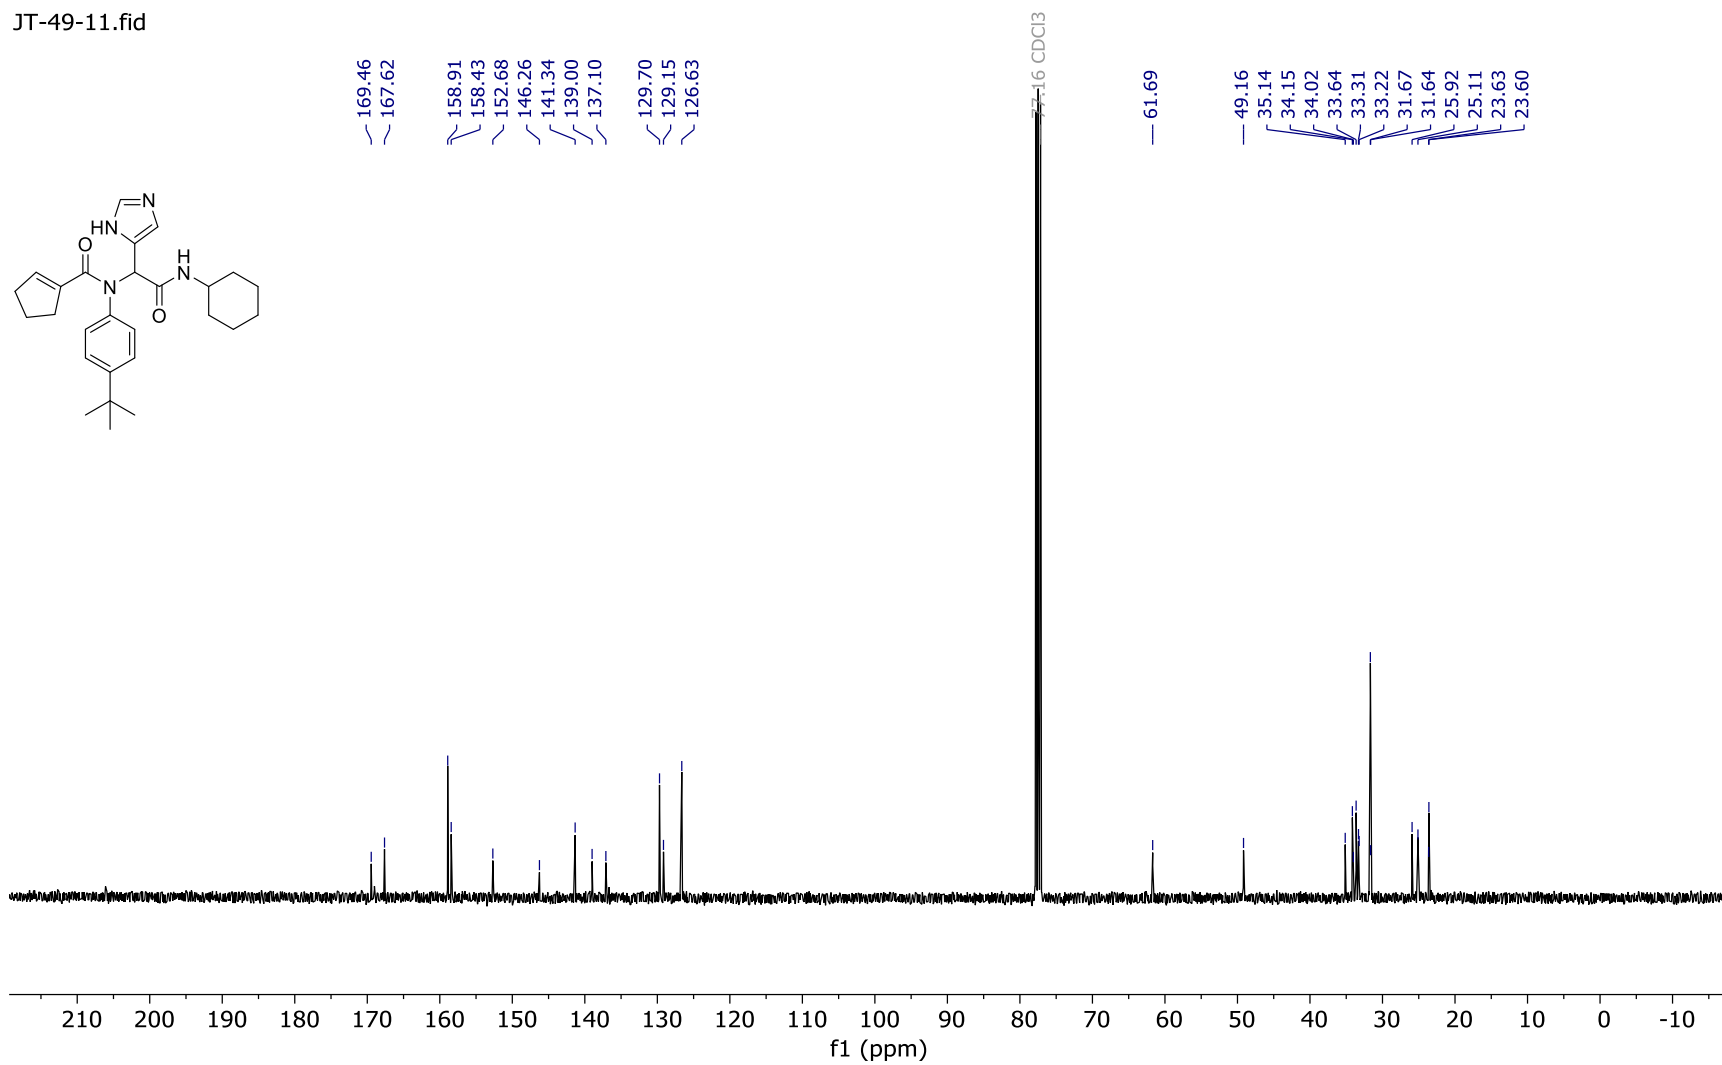



45. Compound **12a** <sup>1</sup>H NMR

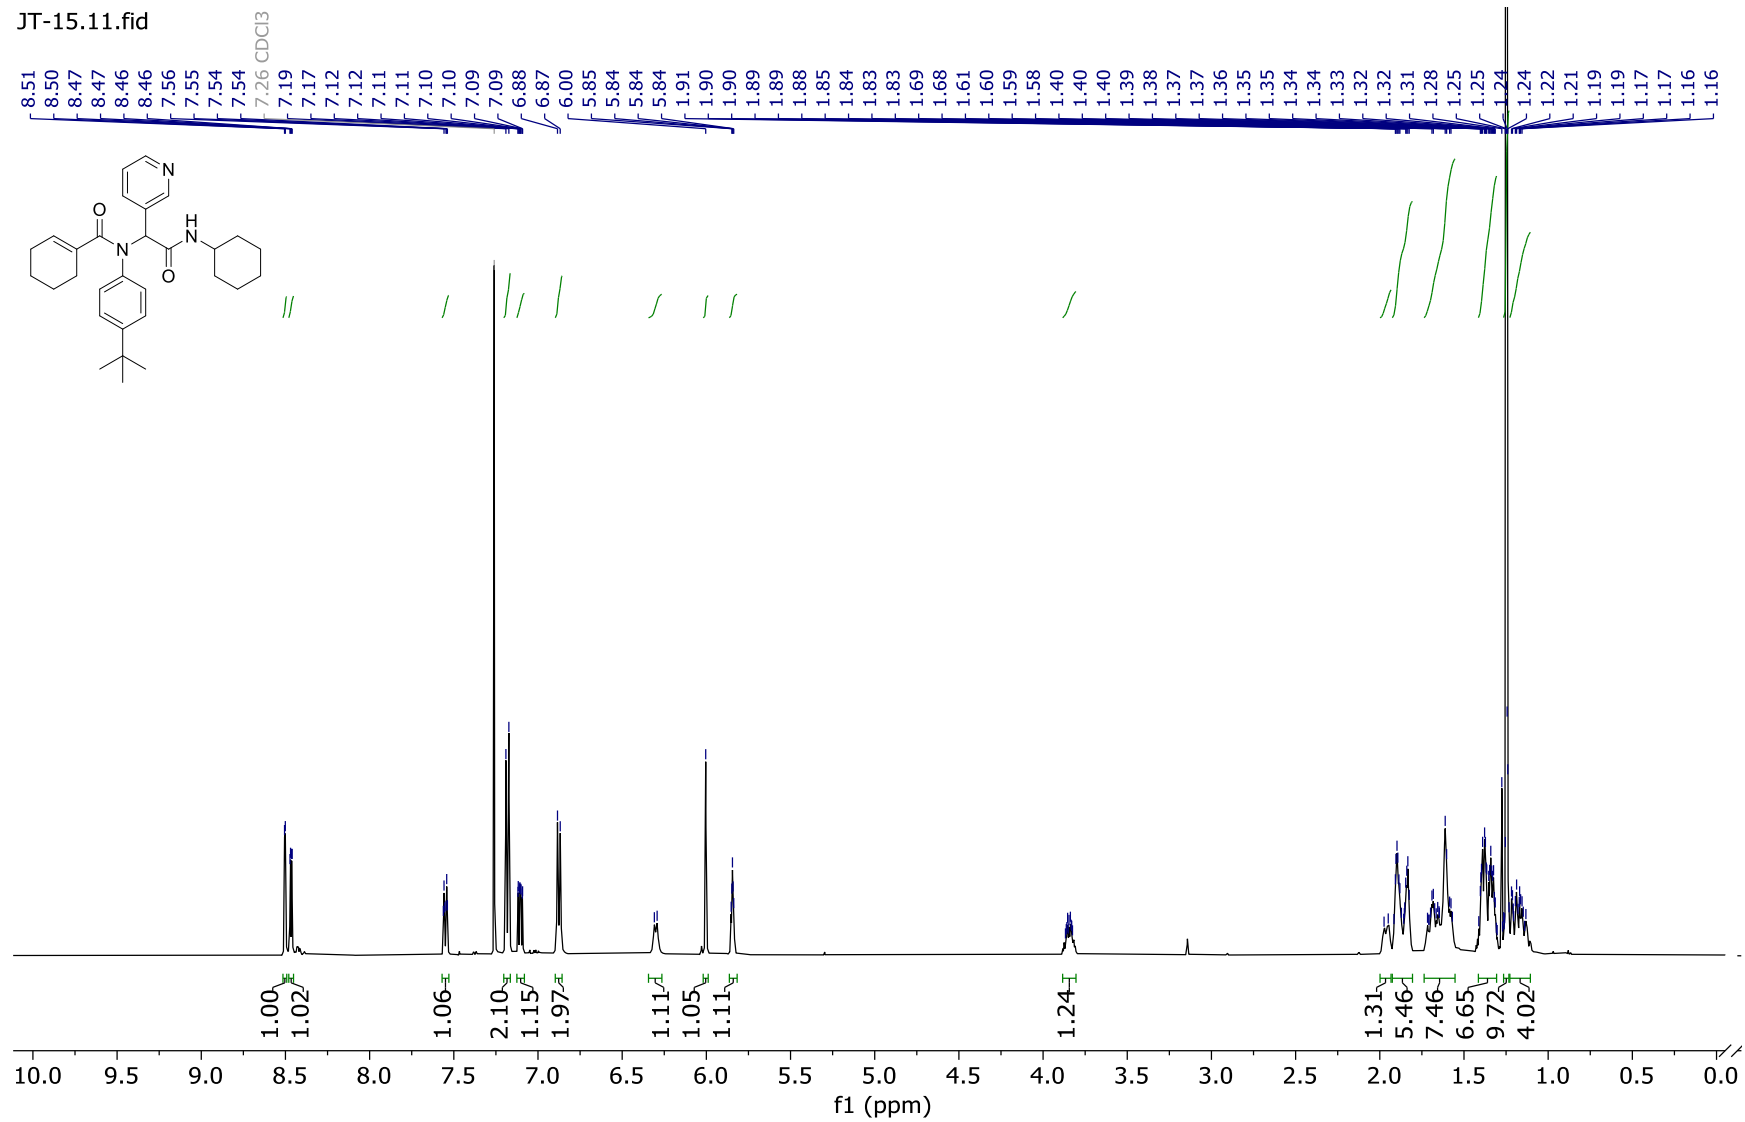

46. Compound **12a** <sup>13</sup>C NMR

JT-15.12.fid

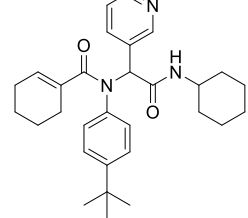

- 173.52
- 168.18
- 151.11
- 151.05
- 149.50
- 138.33
- 137.79
- 134.48
- 133.17
- 131.12
- 129.08
- 125.69
- 123.02
- 77.16 (CDCl<sub>3</sub>)
- 63.95
- 48.72
- 34.68
- 33.01
- 32.97
- 31.37
- 26.14
- 25.64
- 25.00
- 24.85
- 22.04
- 21.45

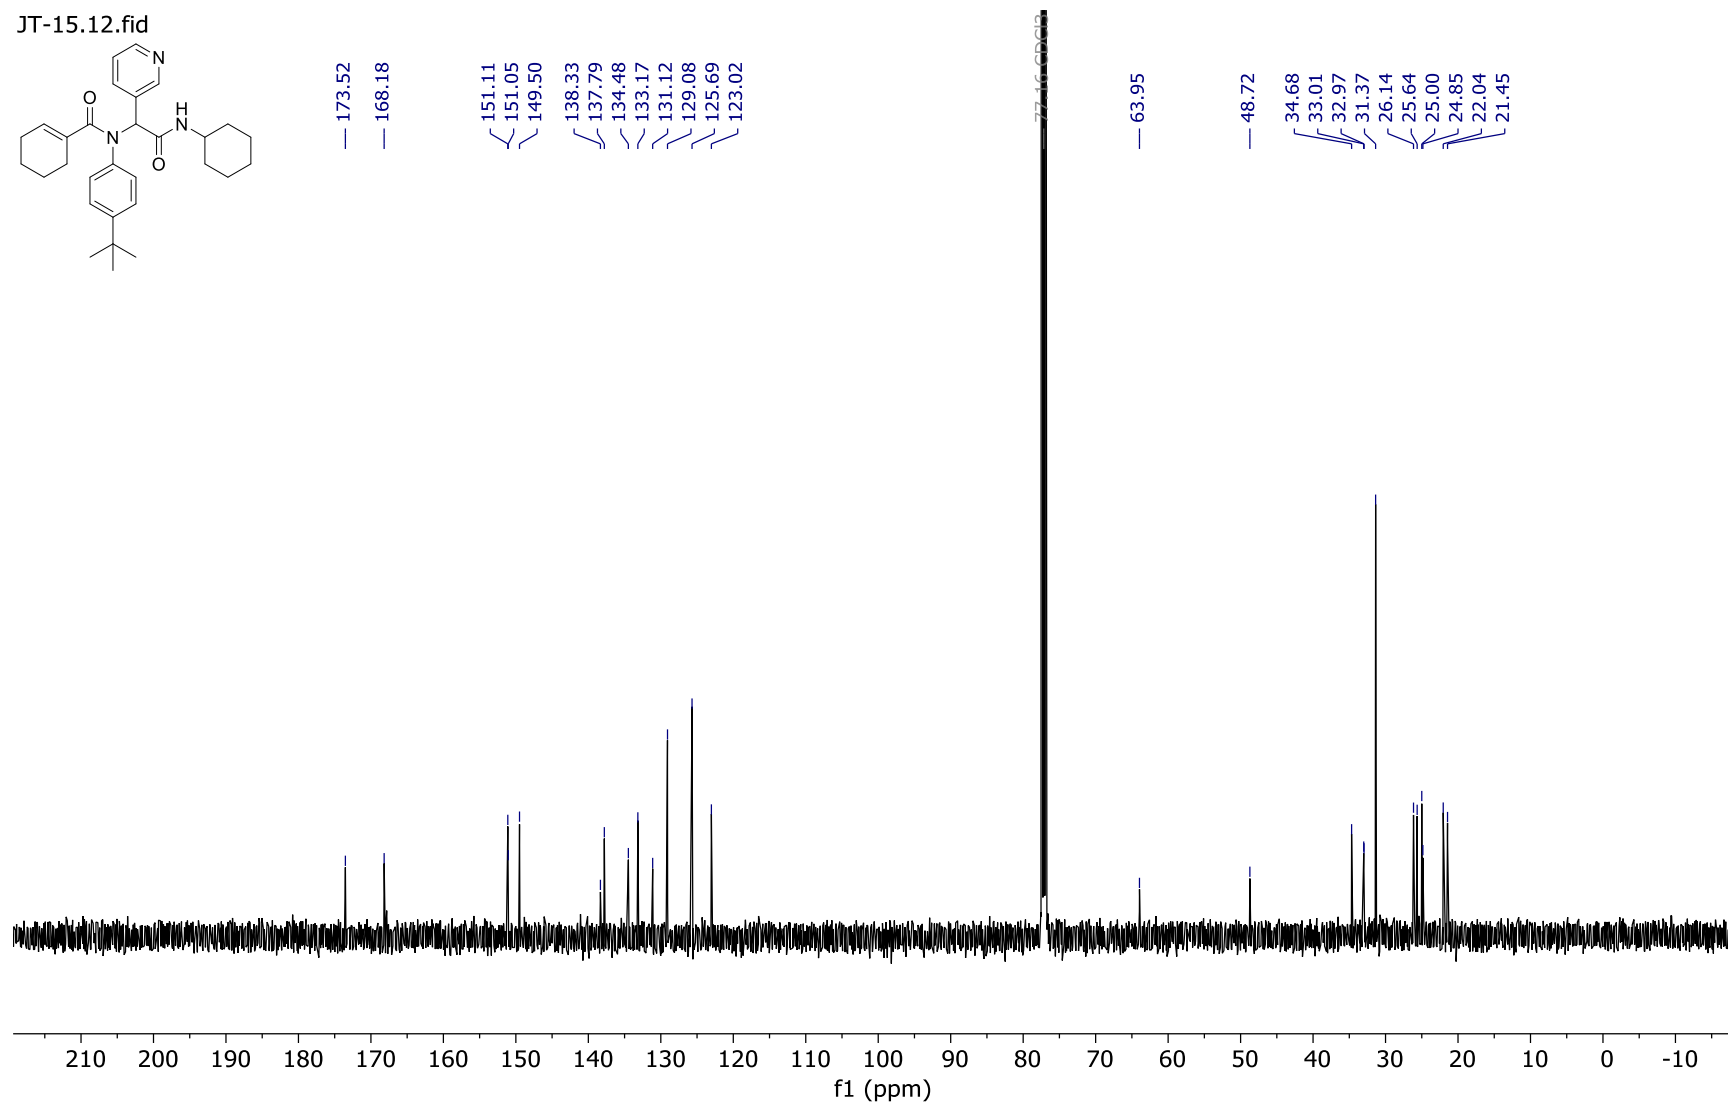

47. Compound **13a** <sup>1</sup>H NMR

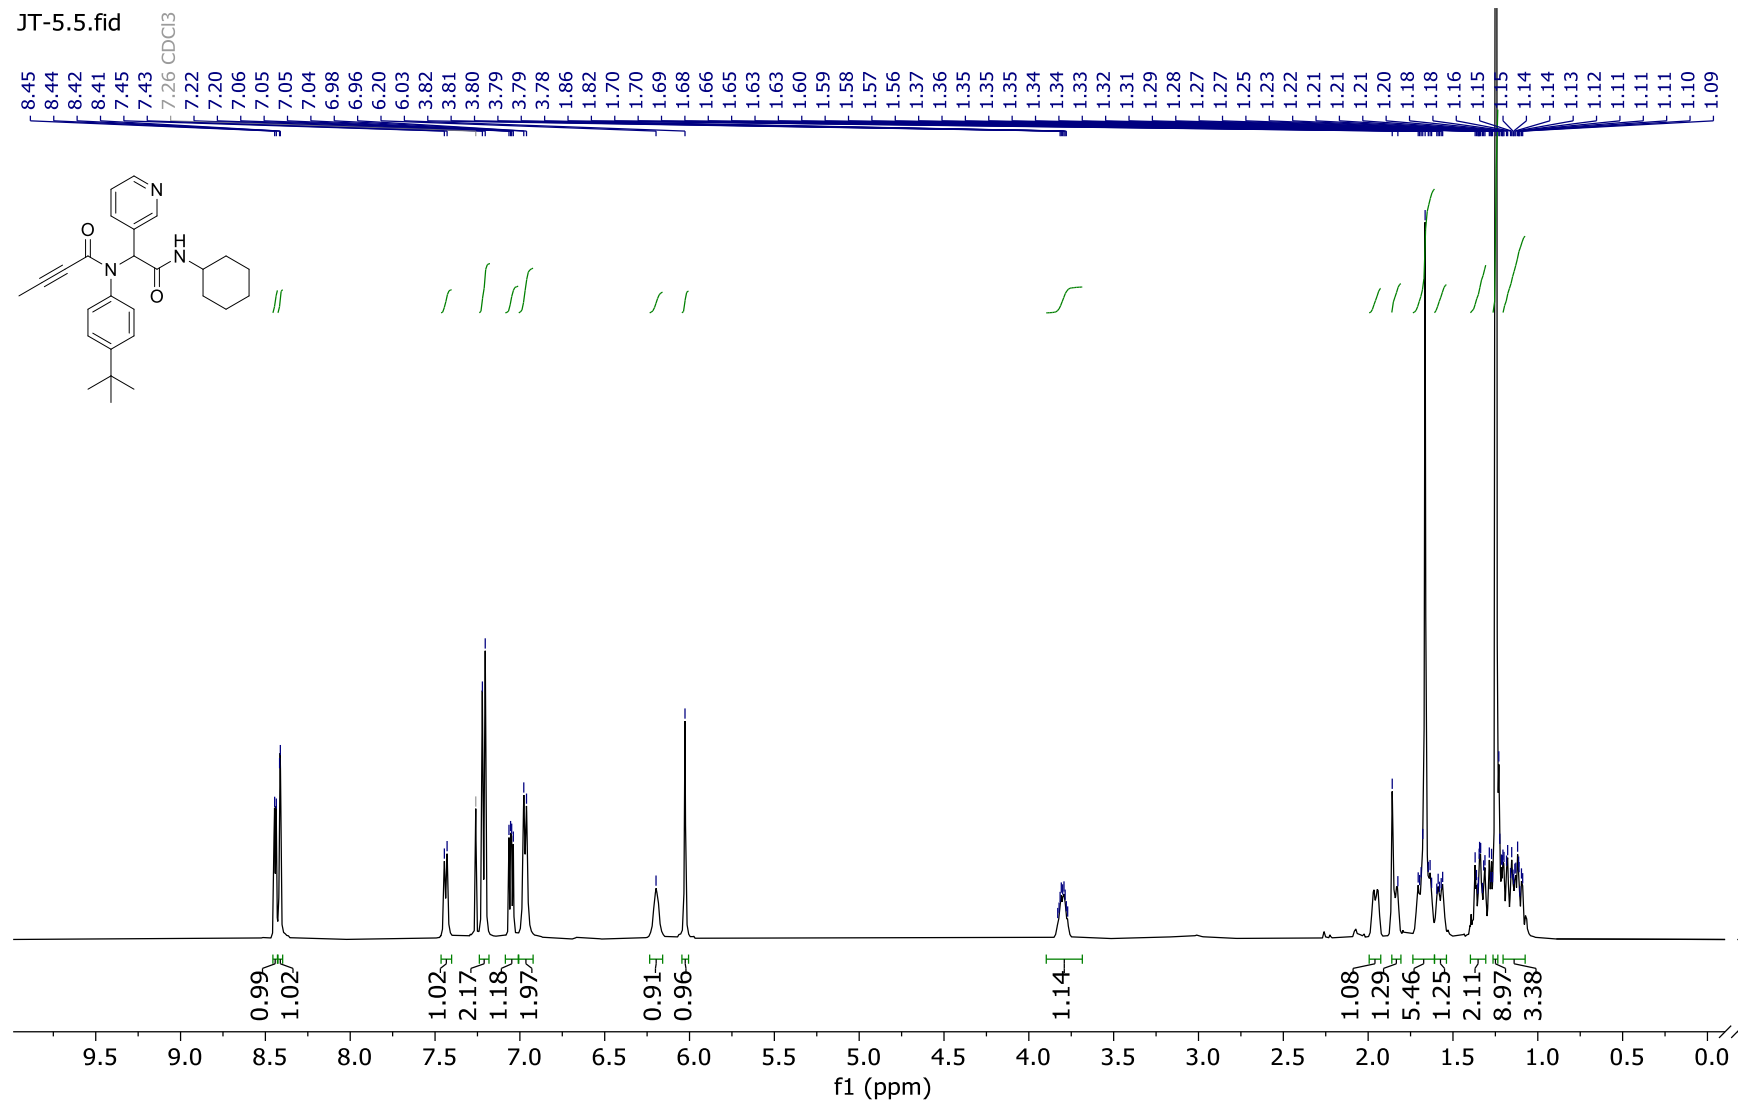

48. Compound **13a** <sup>13</sup>C NMR

JT-5.6.fid

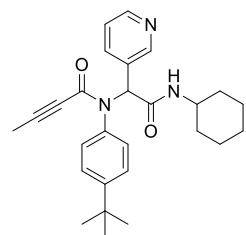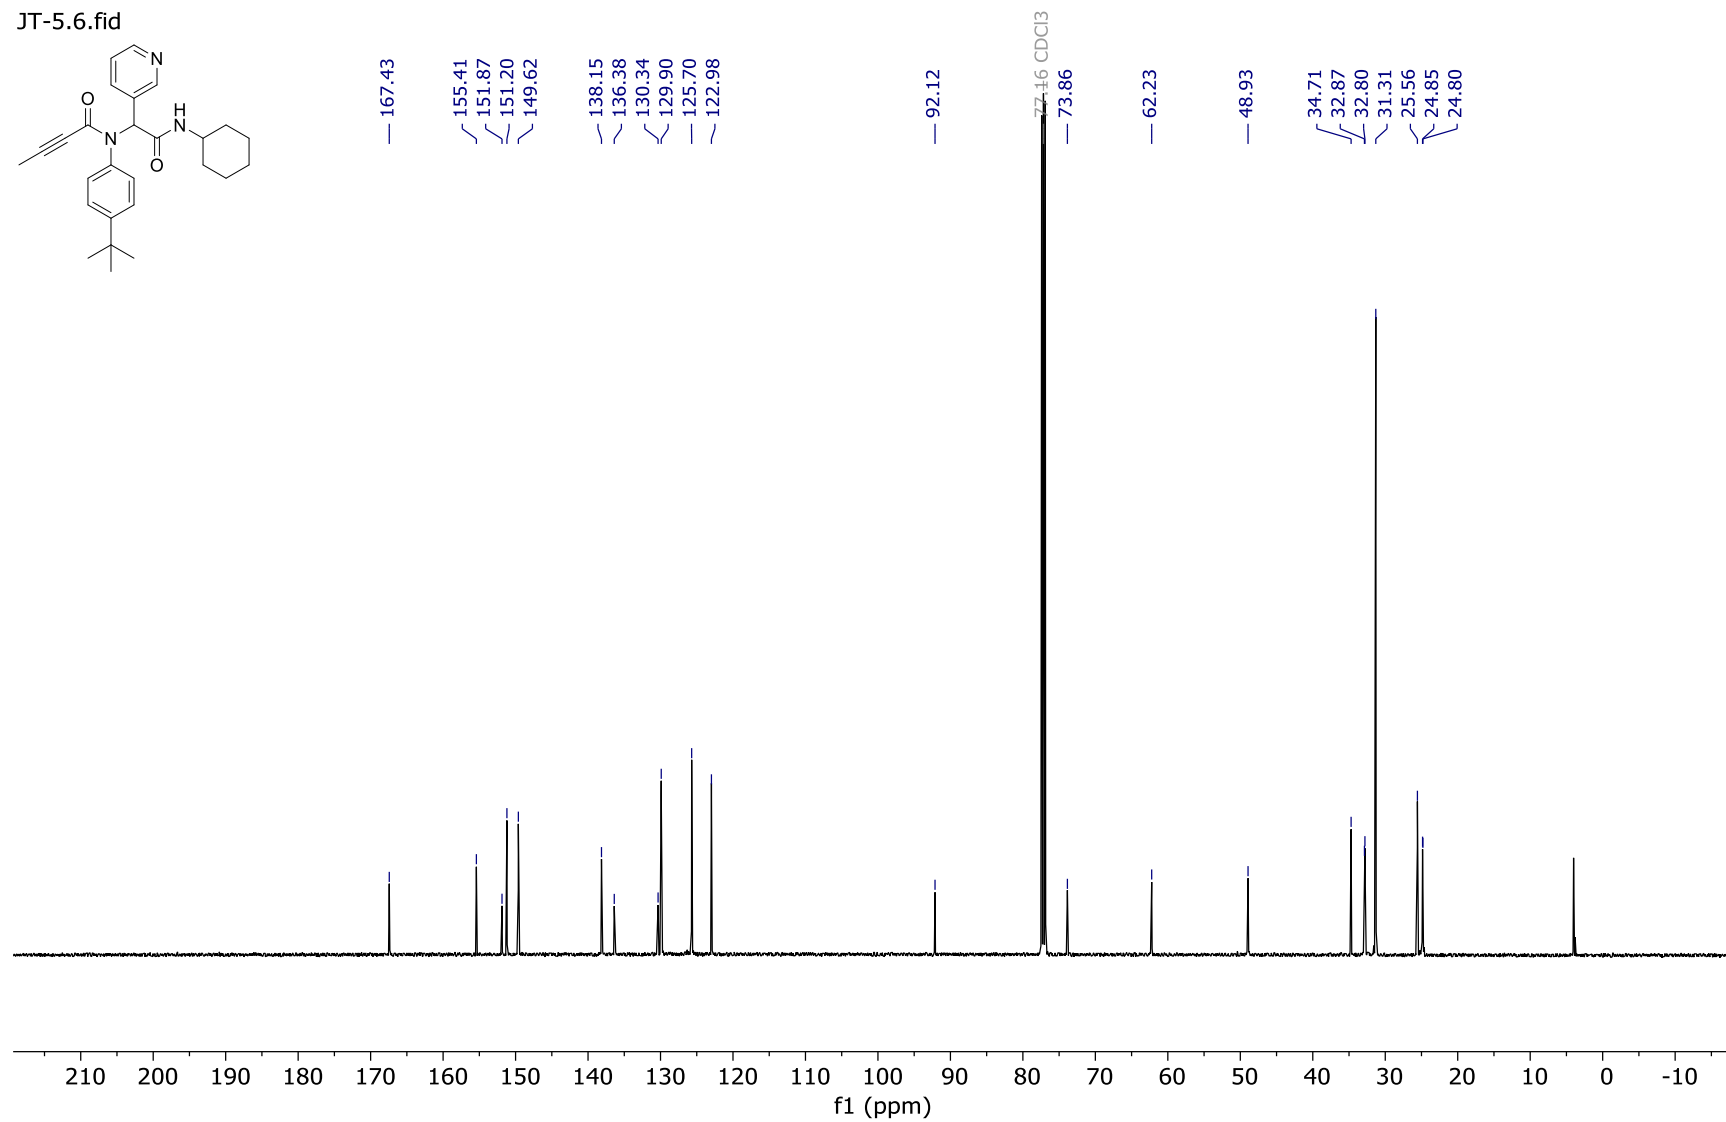

49. Compound **13b** <sup>1</sup>H NMR

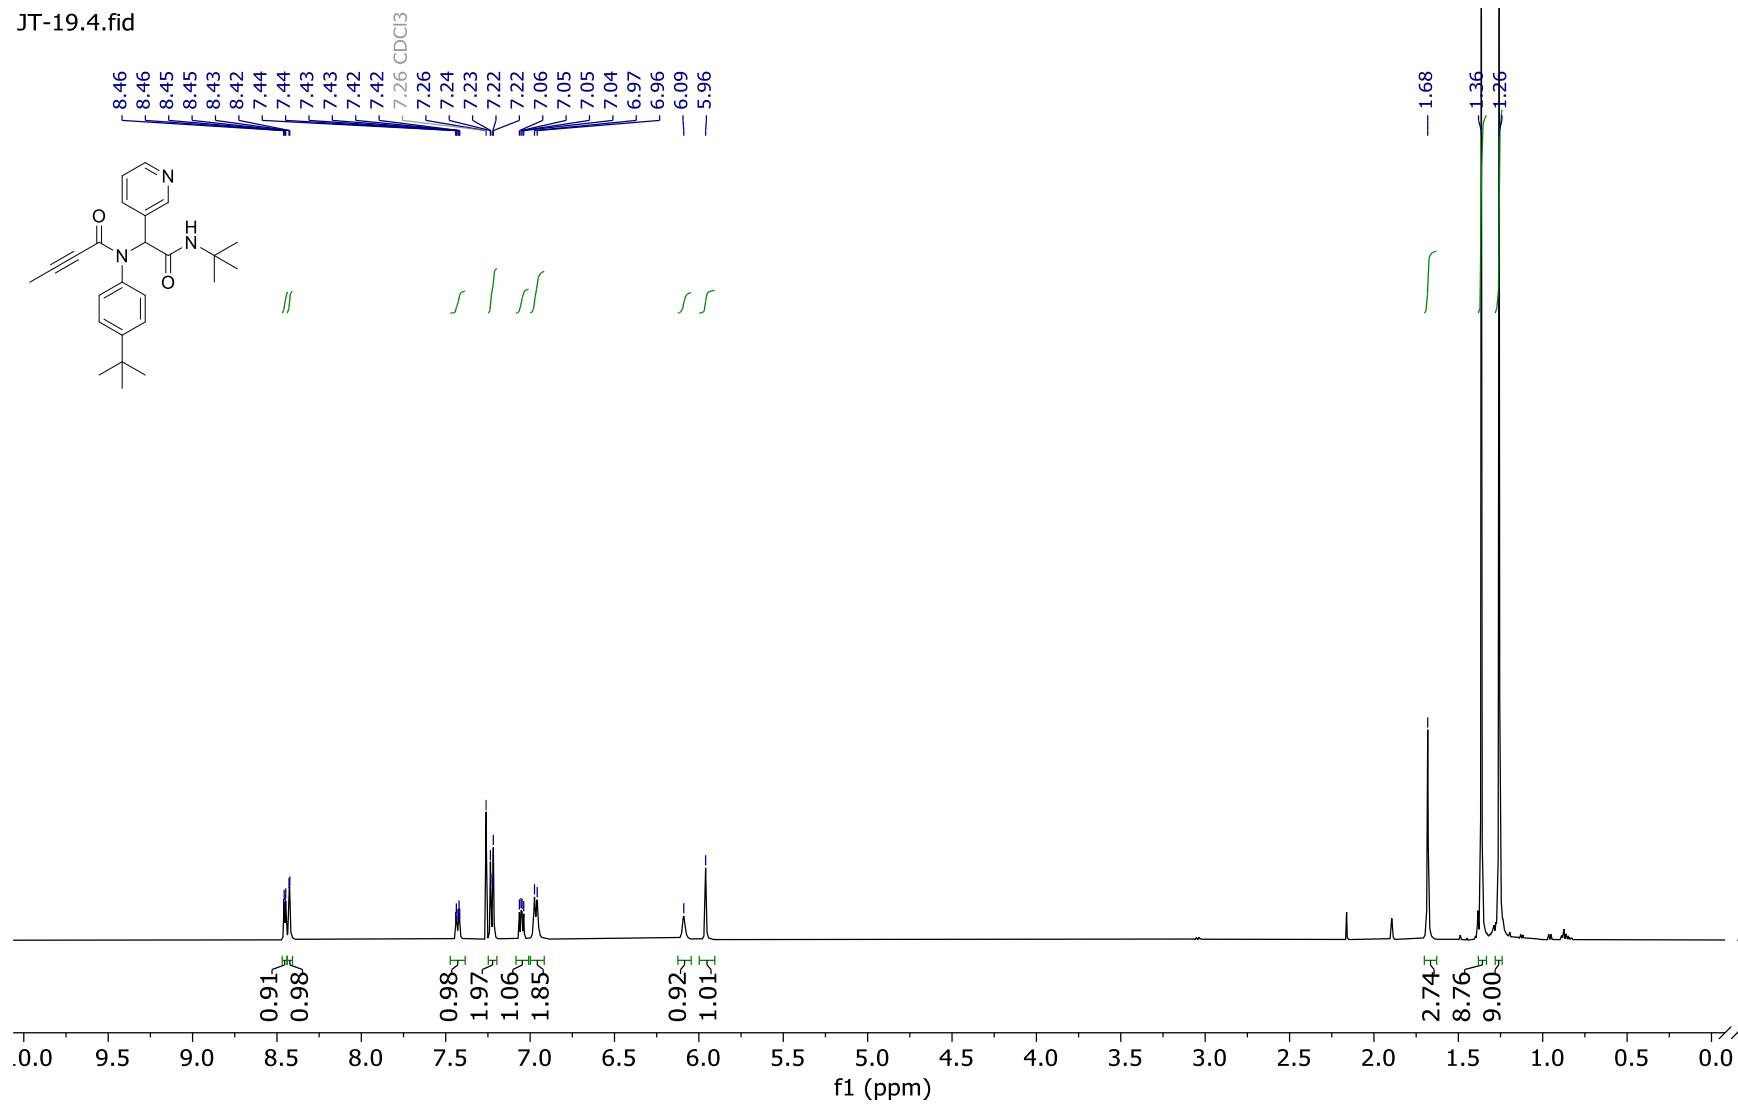

50. Compound **13b** <sup>13</sup>C NMR

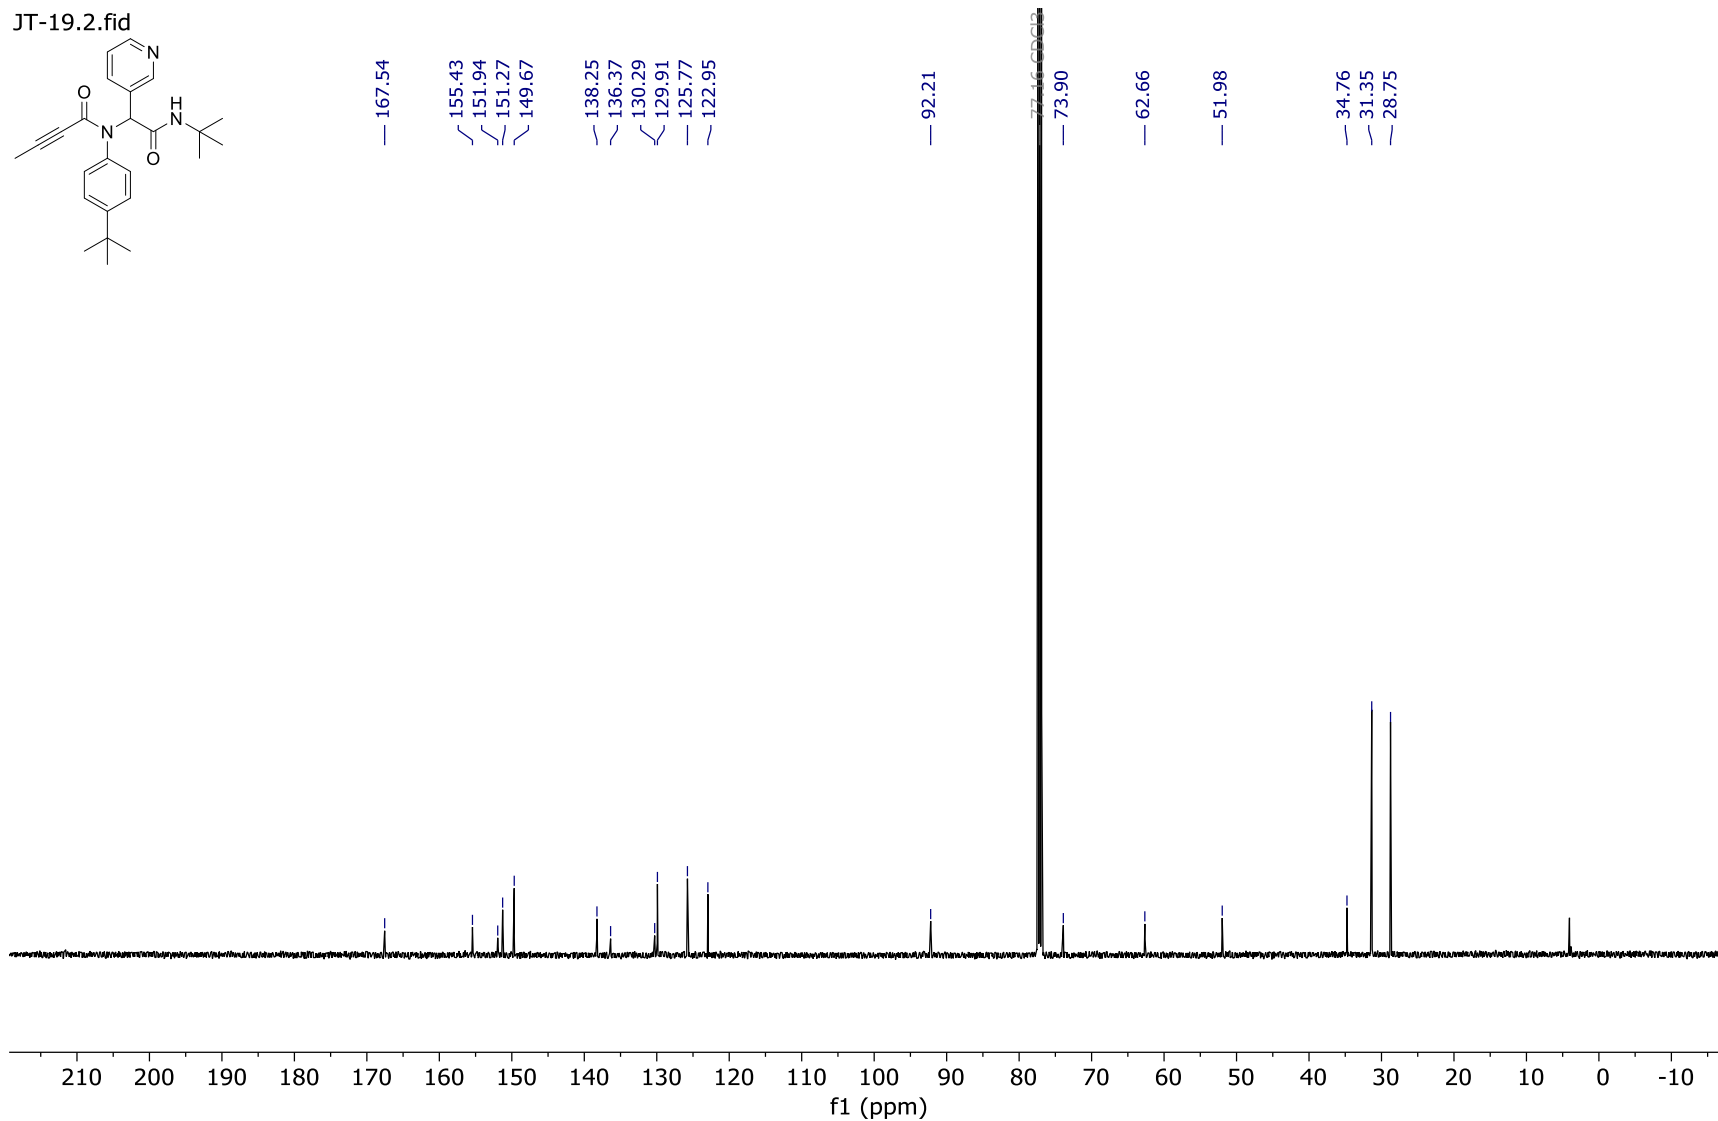

51. Compound **13c** <sup>1</sup>H NMR

JT-64.2.fid

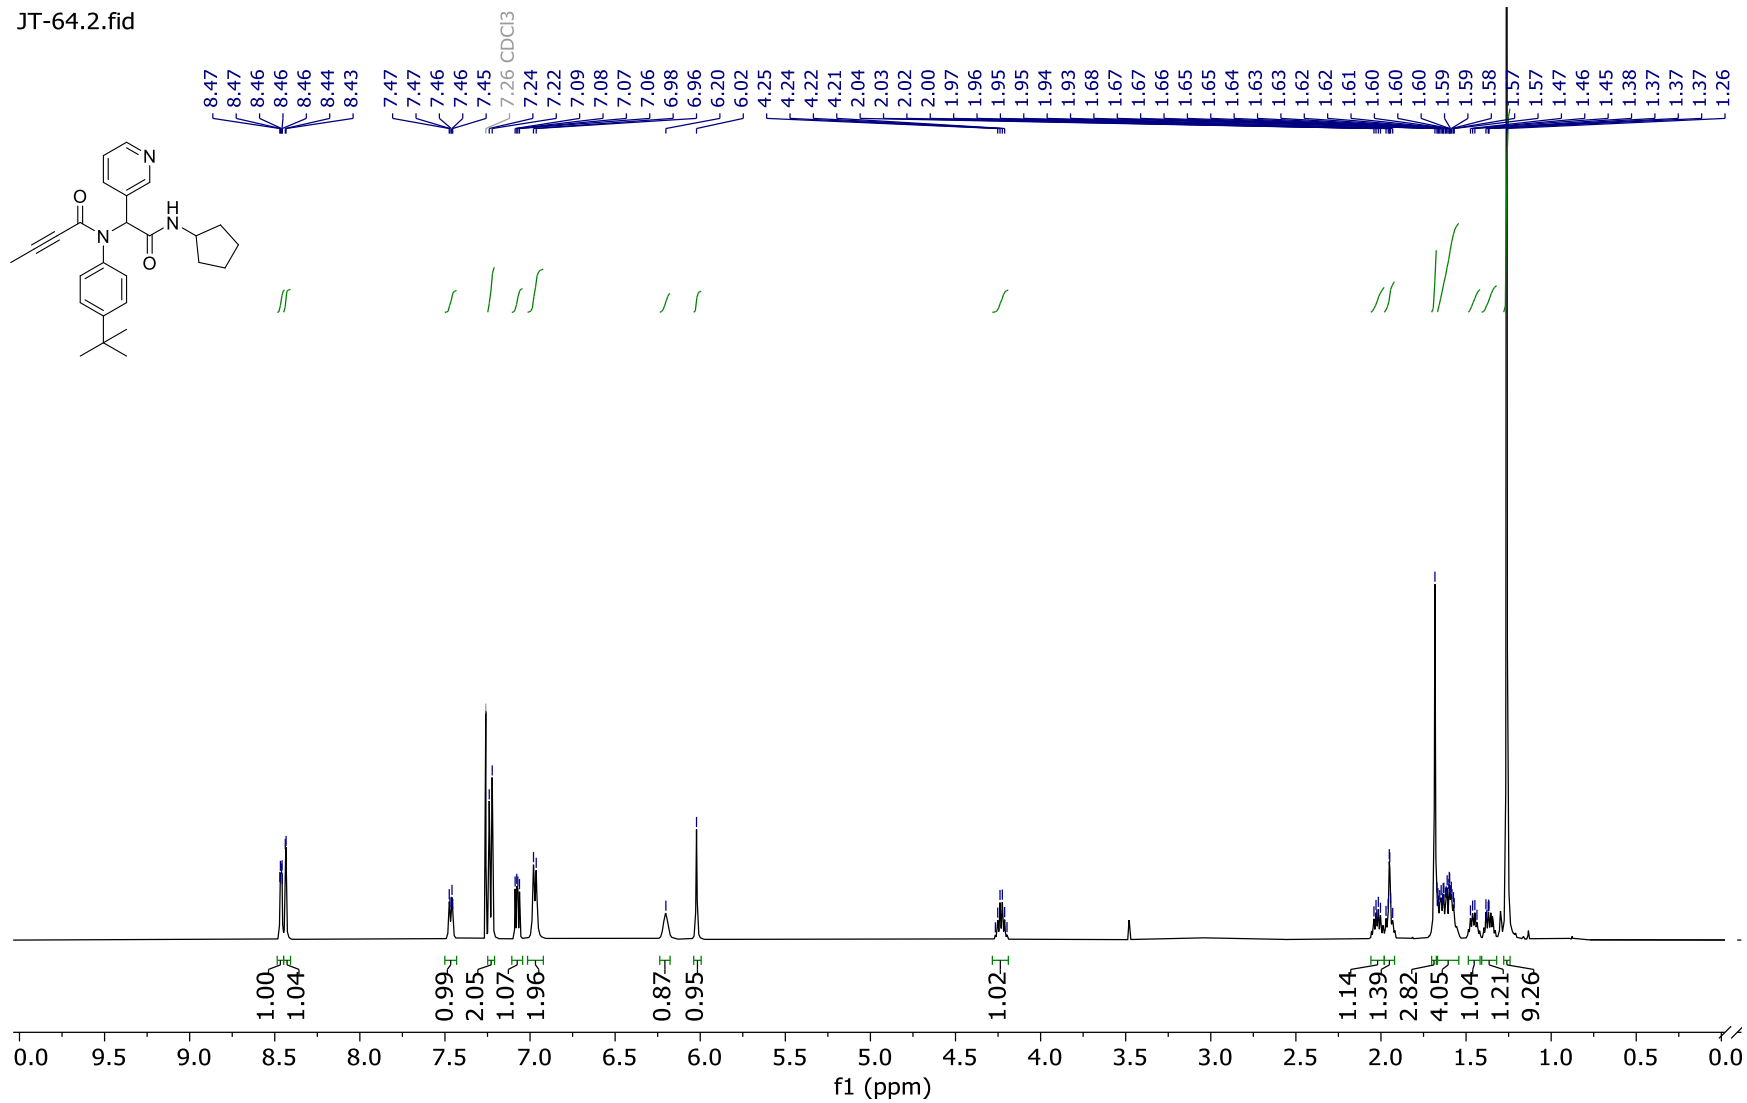

52. Compound **13c** <sup>13</sup>C NMR

JT-64.3.fid

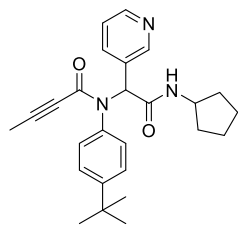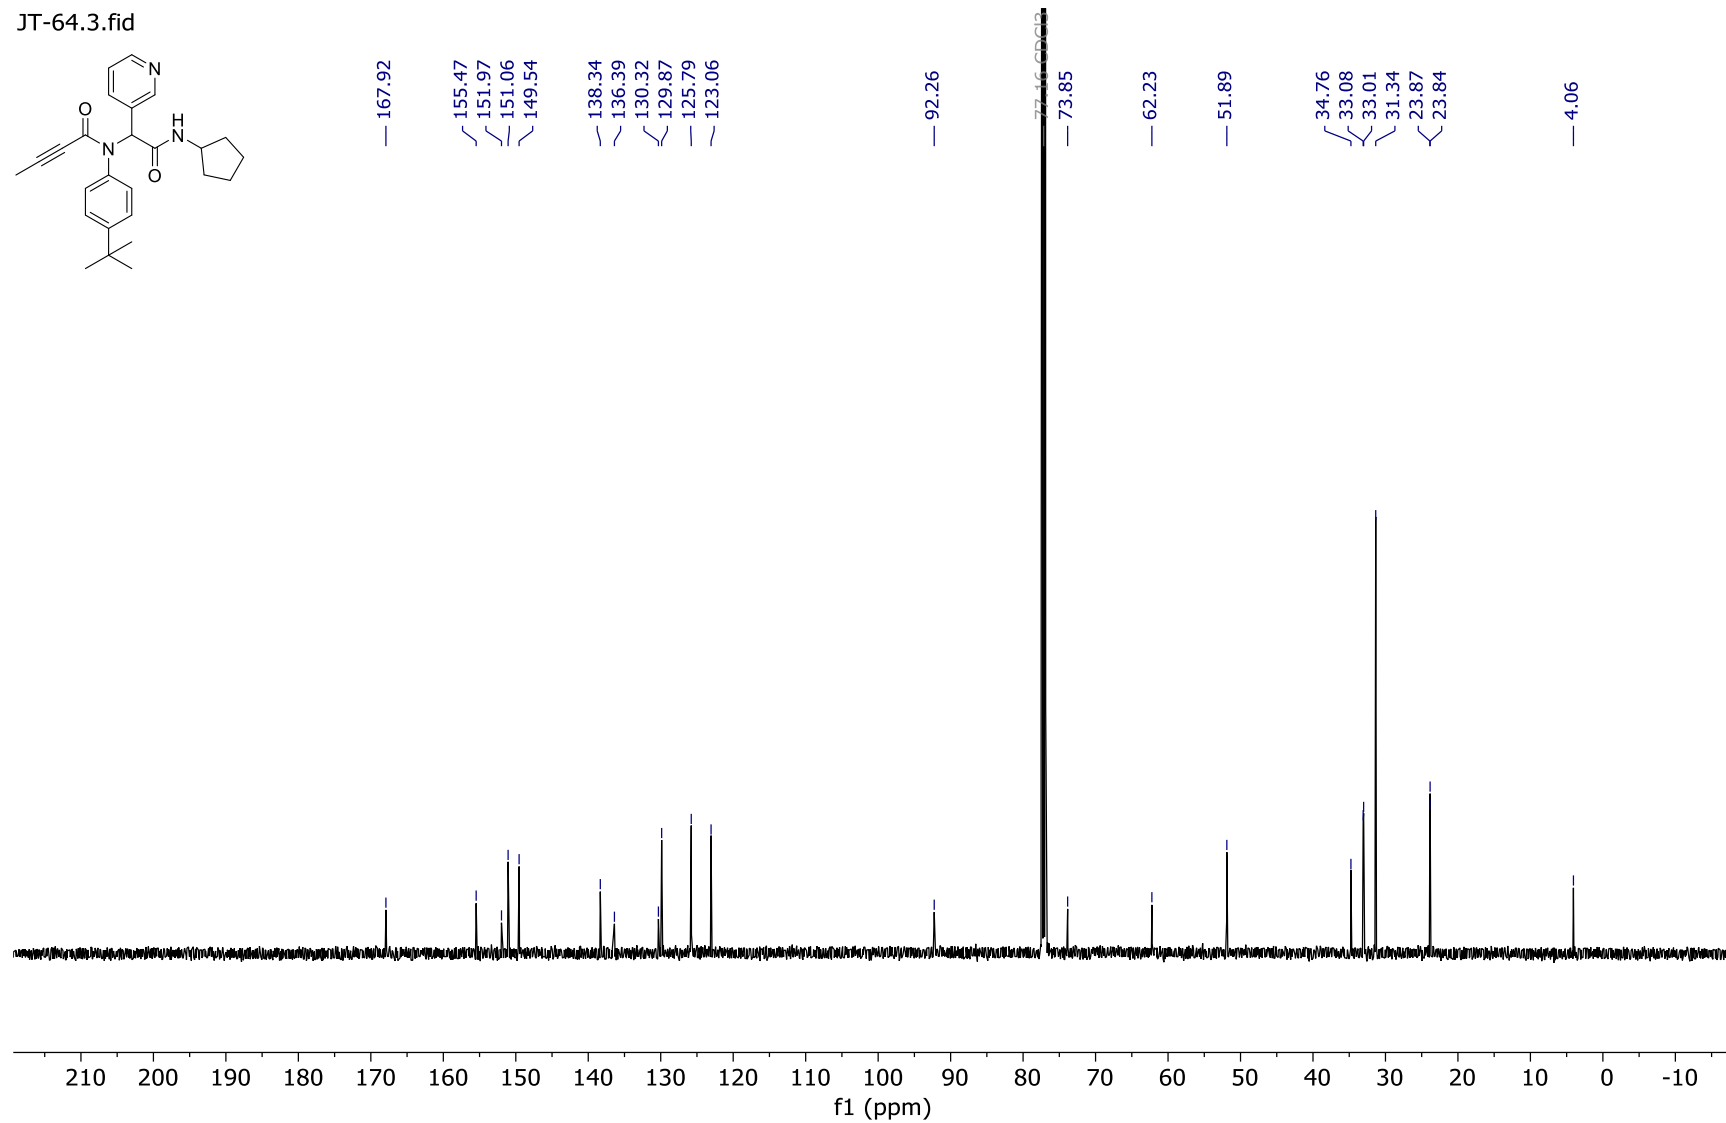



53. Compound **13d** <sup>1</sup>H NMR

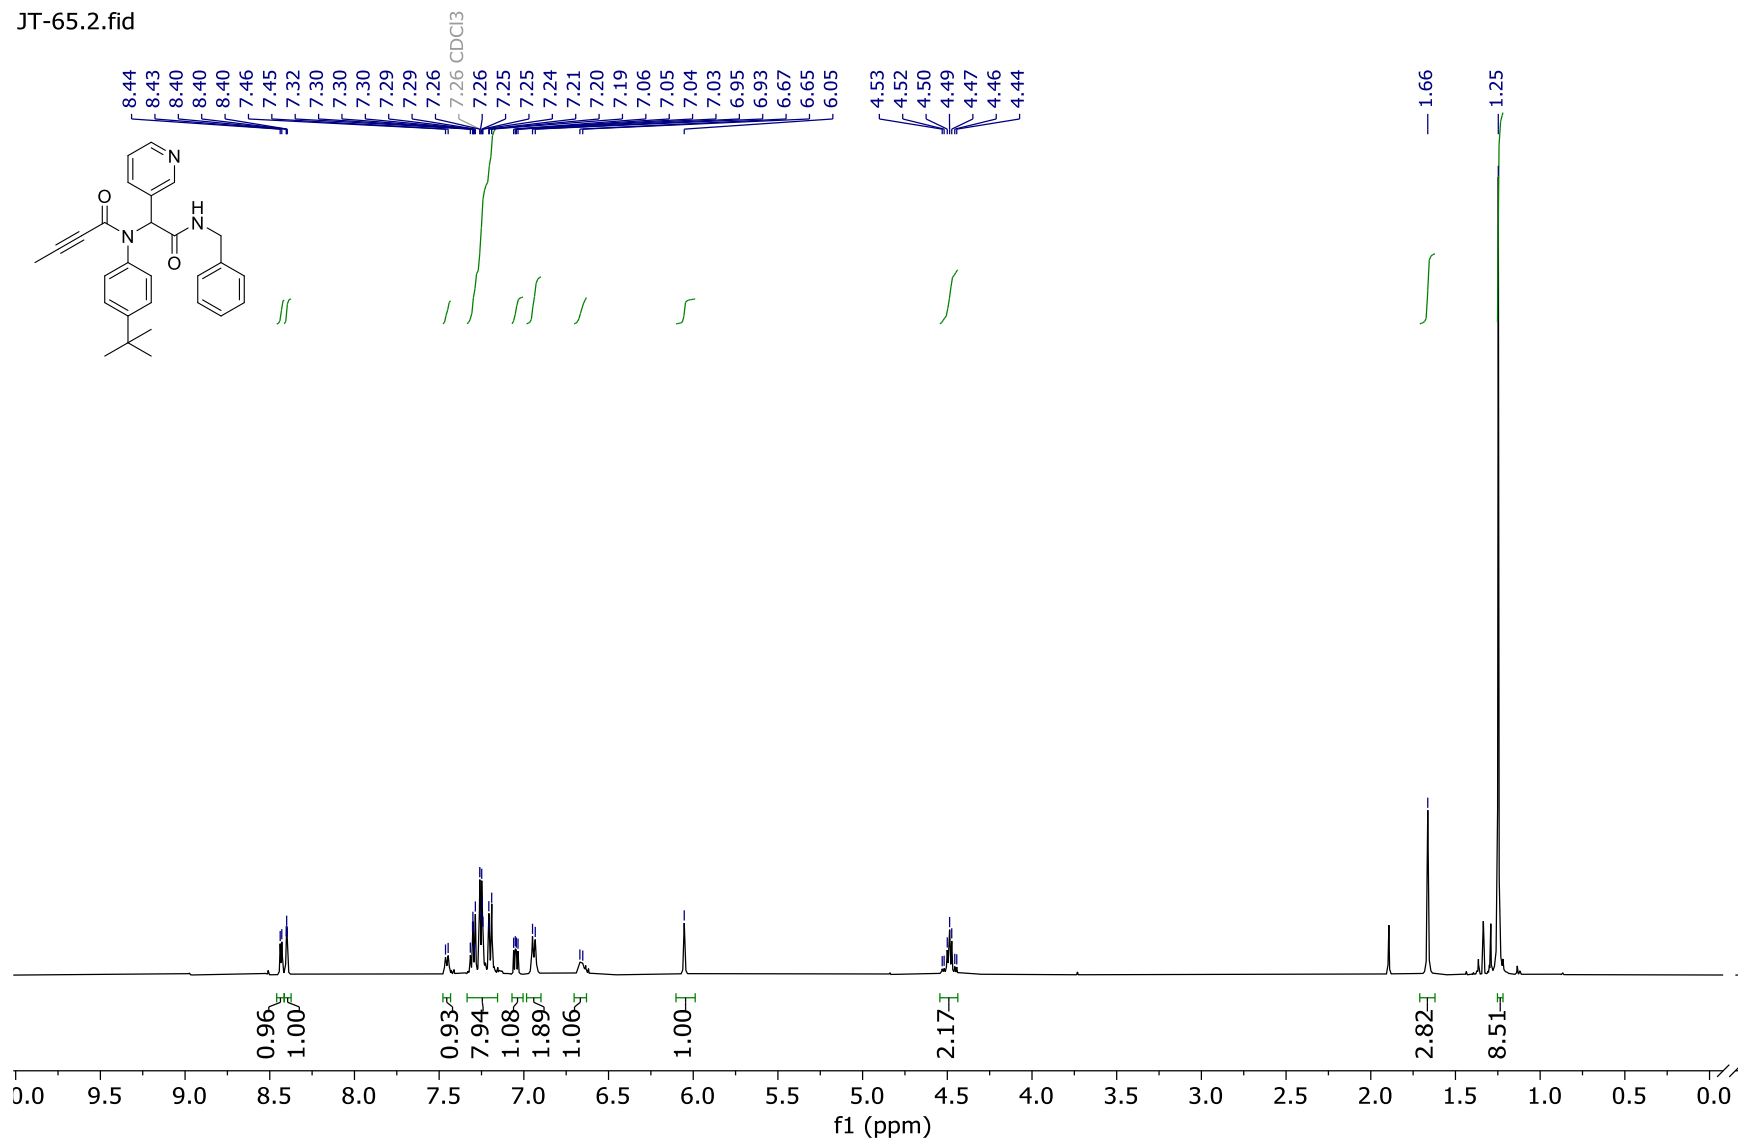

54. Compound **13d** <sup>13</sup>C NMR

JT-65.3.fid

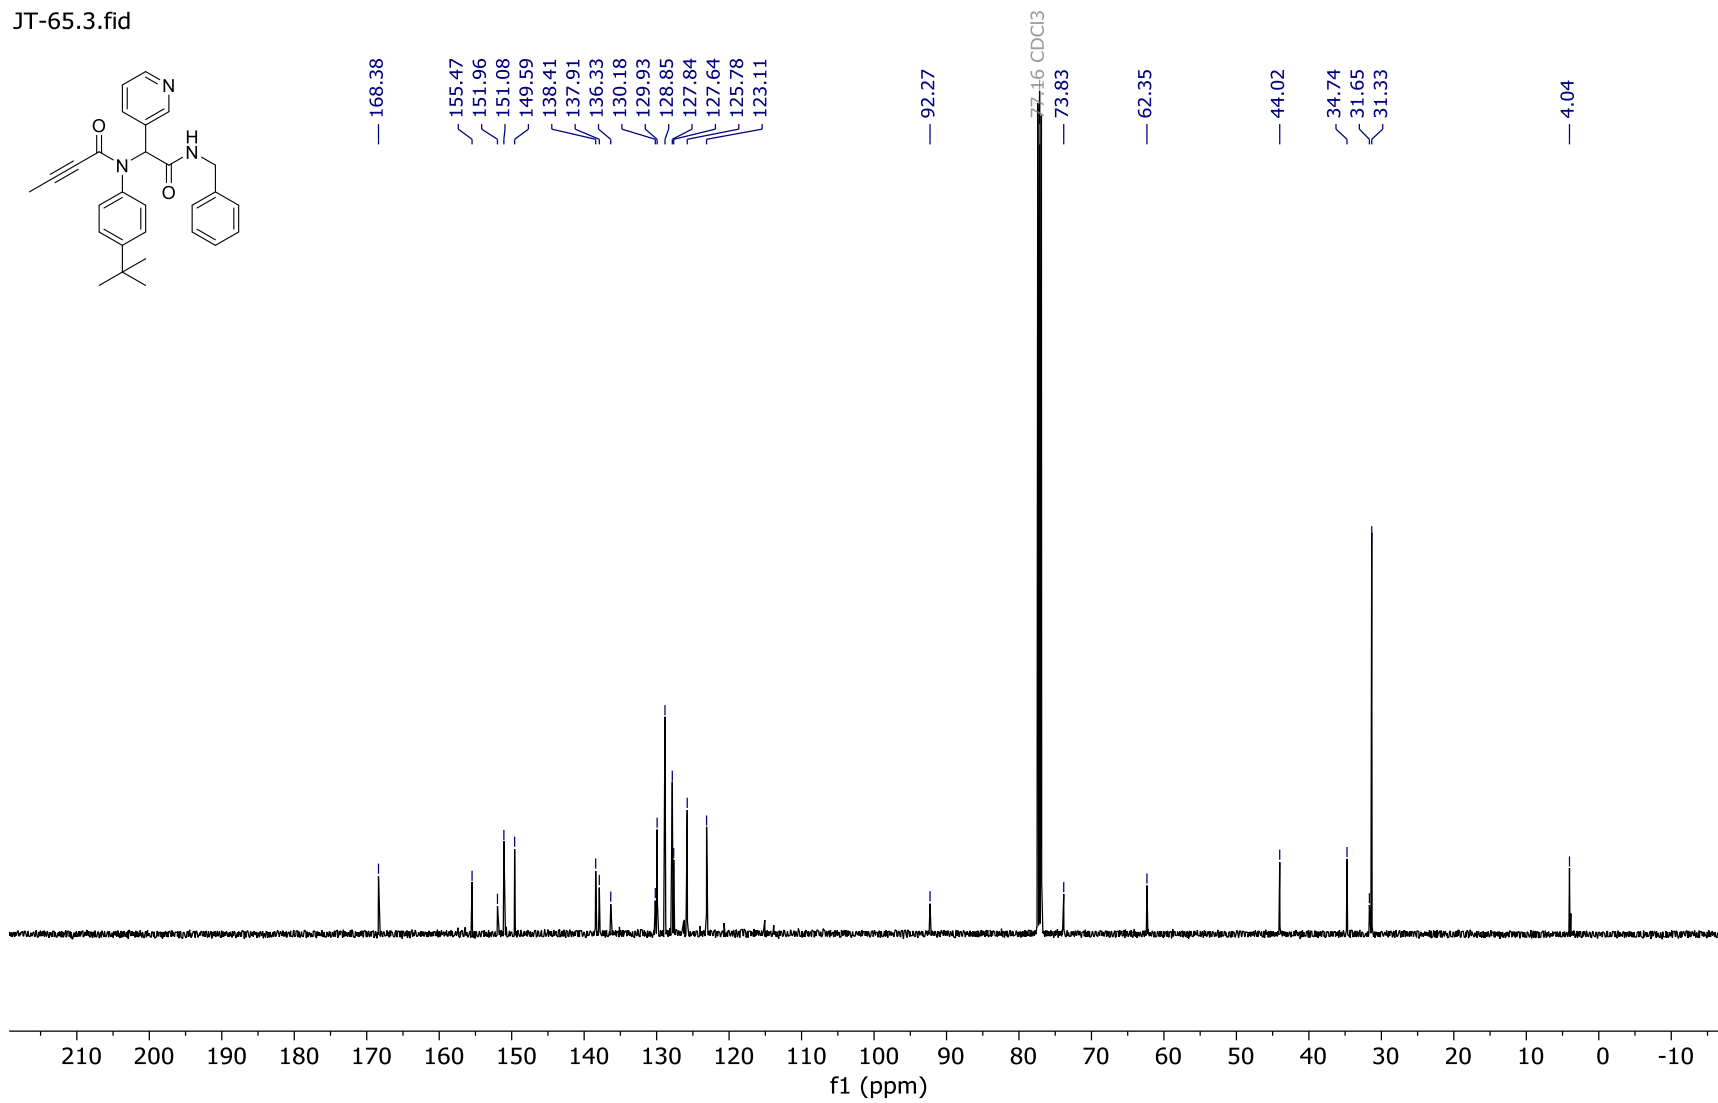

55. Compound **13e** <sup>1</sup>H NMR

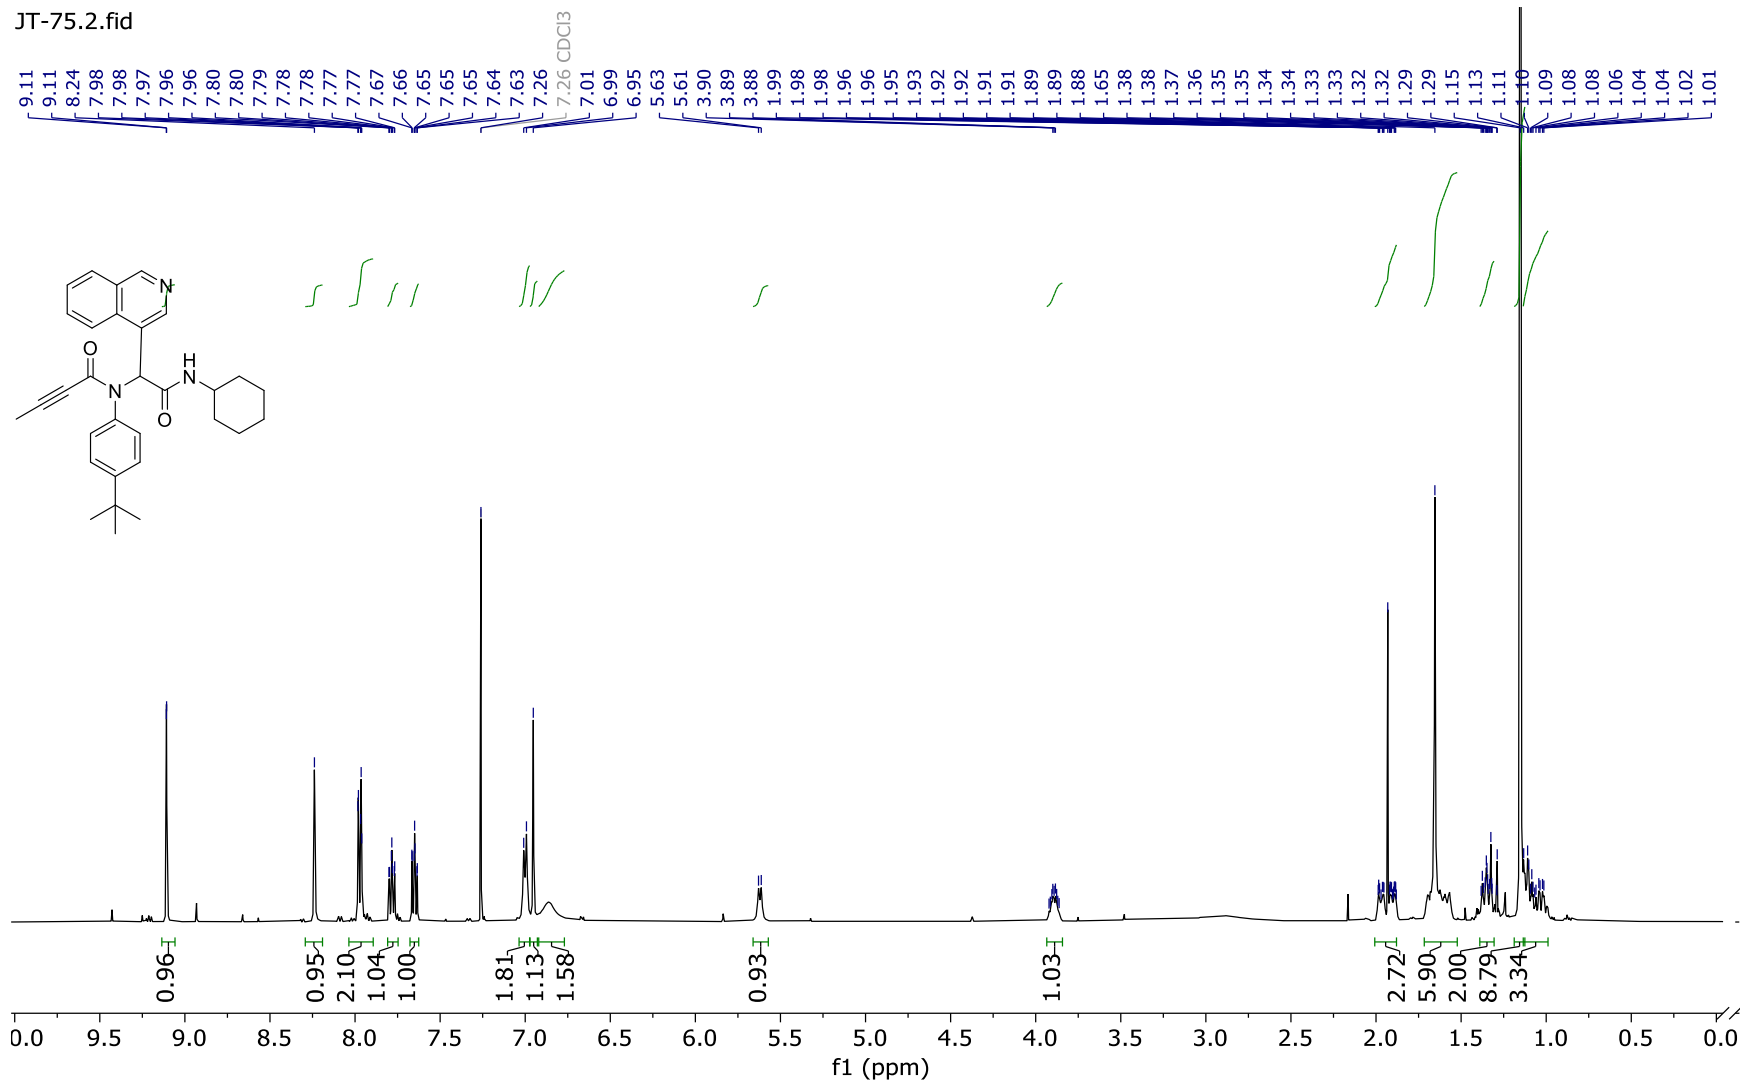

56. Compound **13e** <sup>13</sup>C NMR

JT-75.3.fid

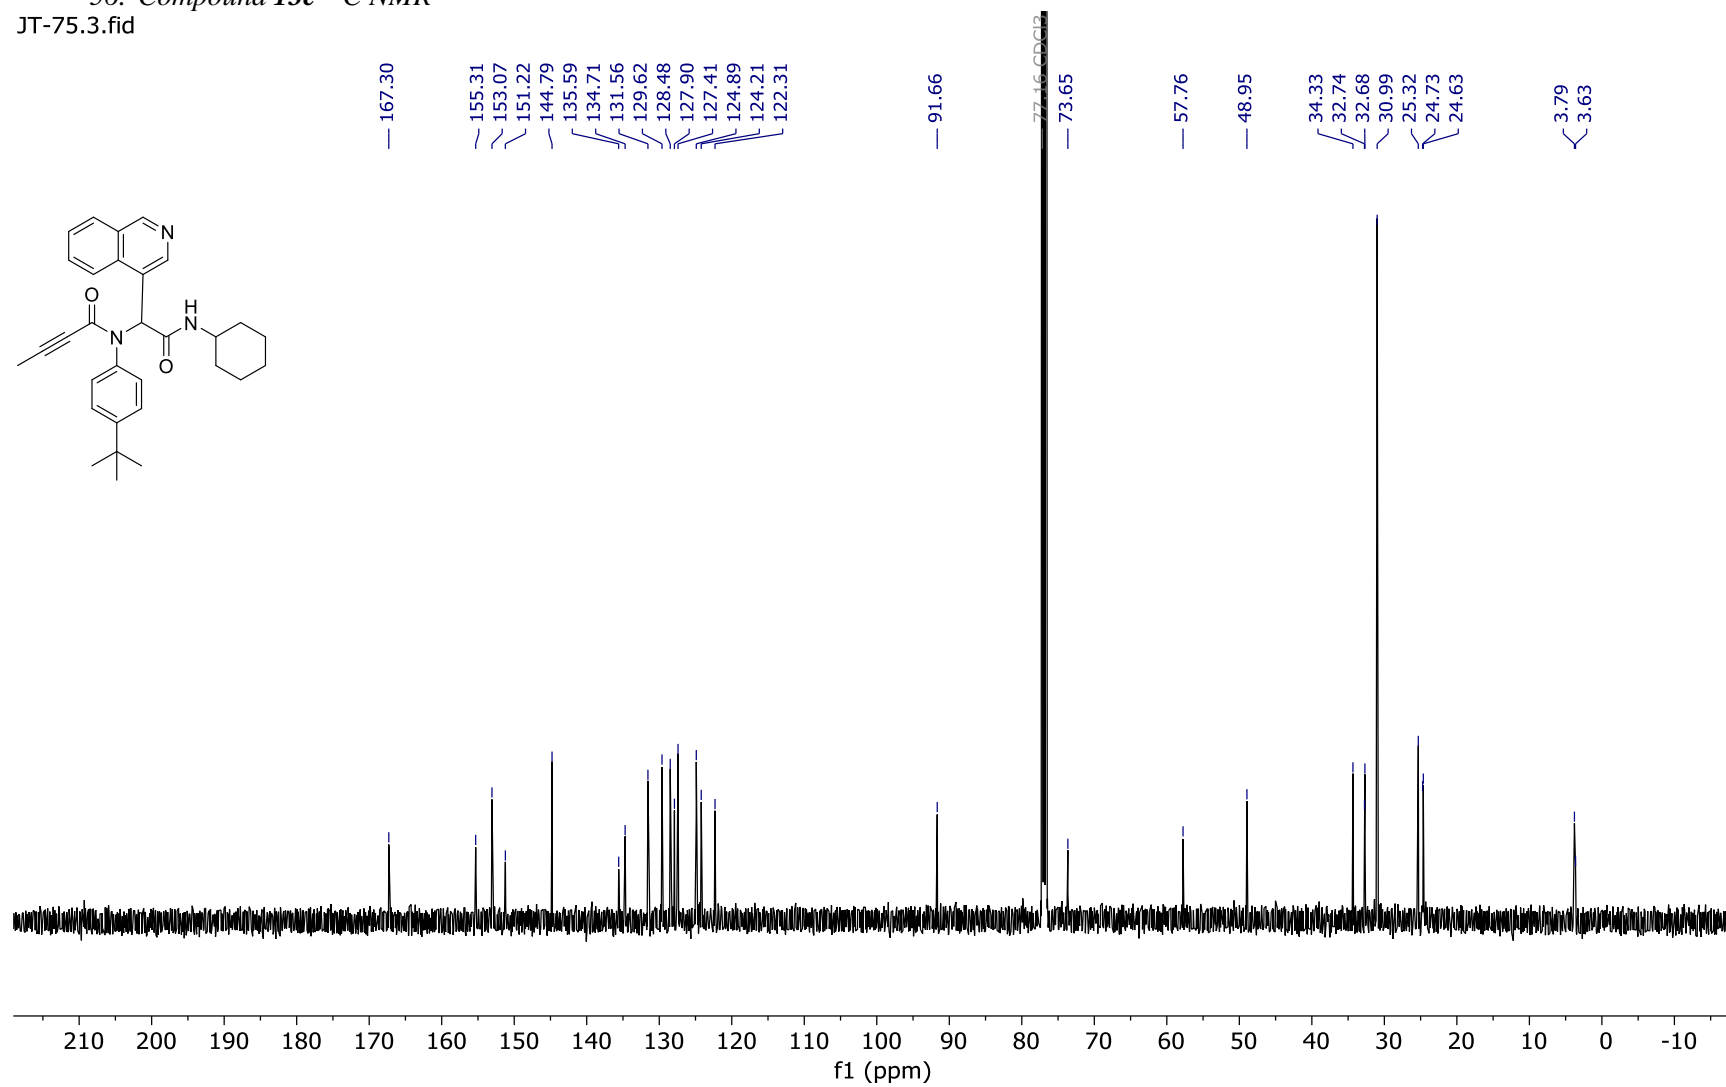

57. Compound **13f** <sup>1</sup>H NMR

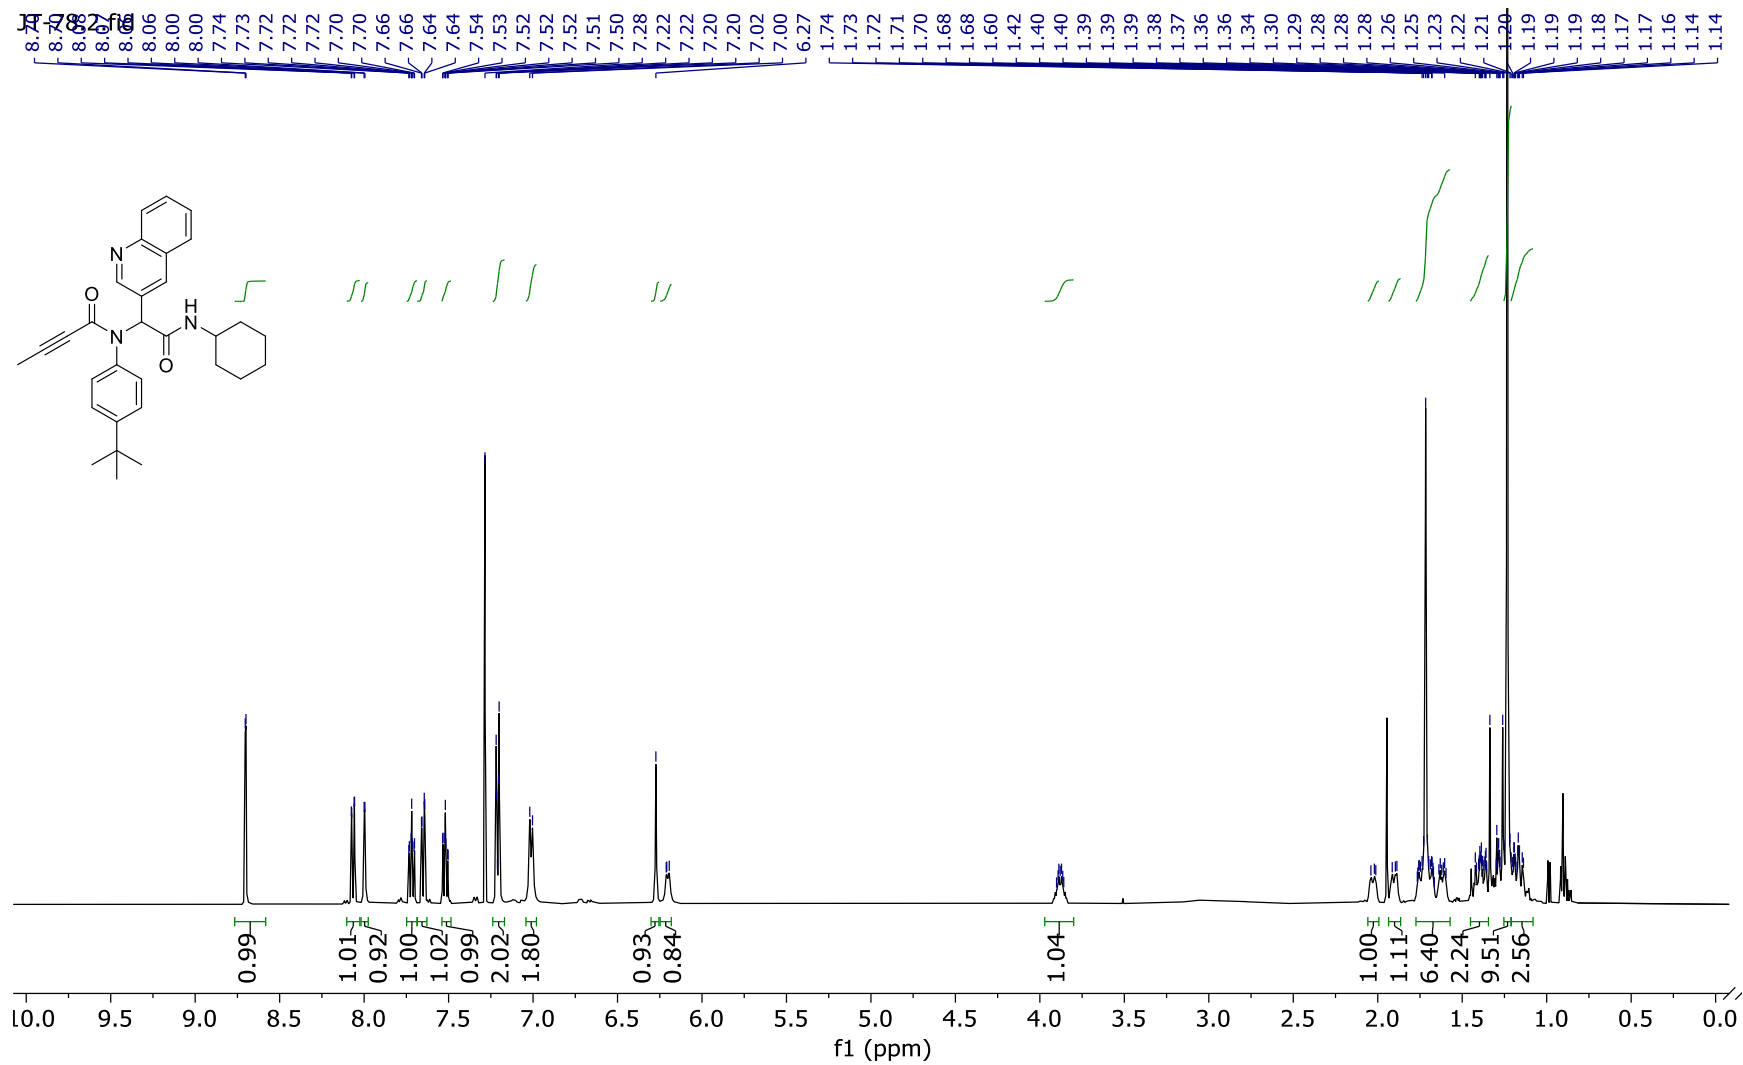

58. Compound **13f** <sup>13</sup>C NMR

JT-78.3.fid

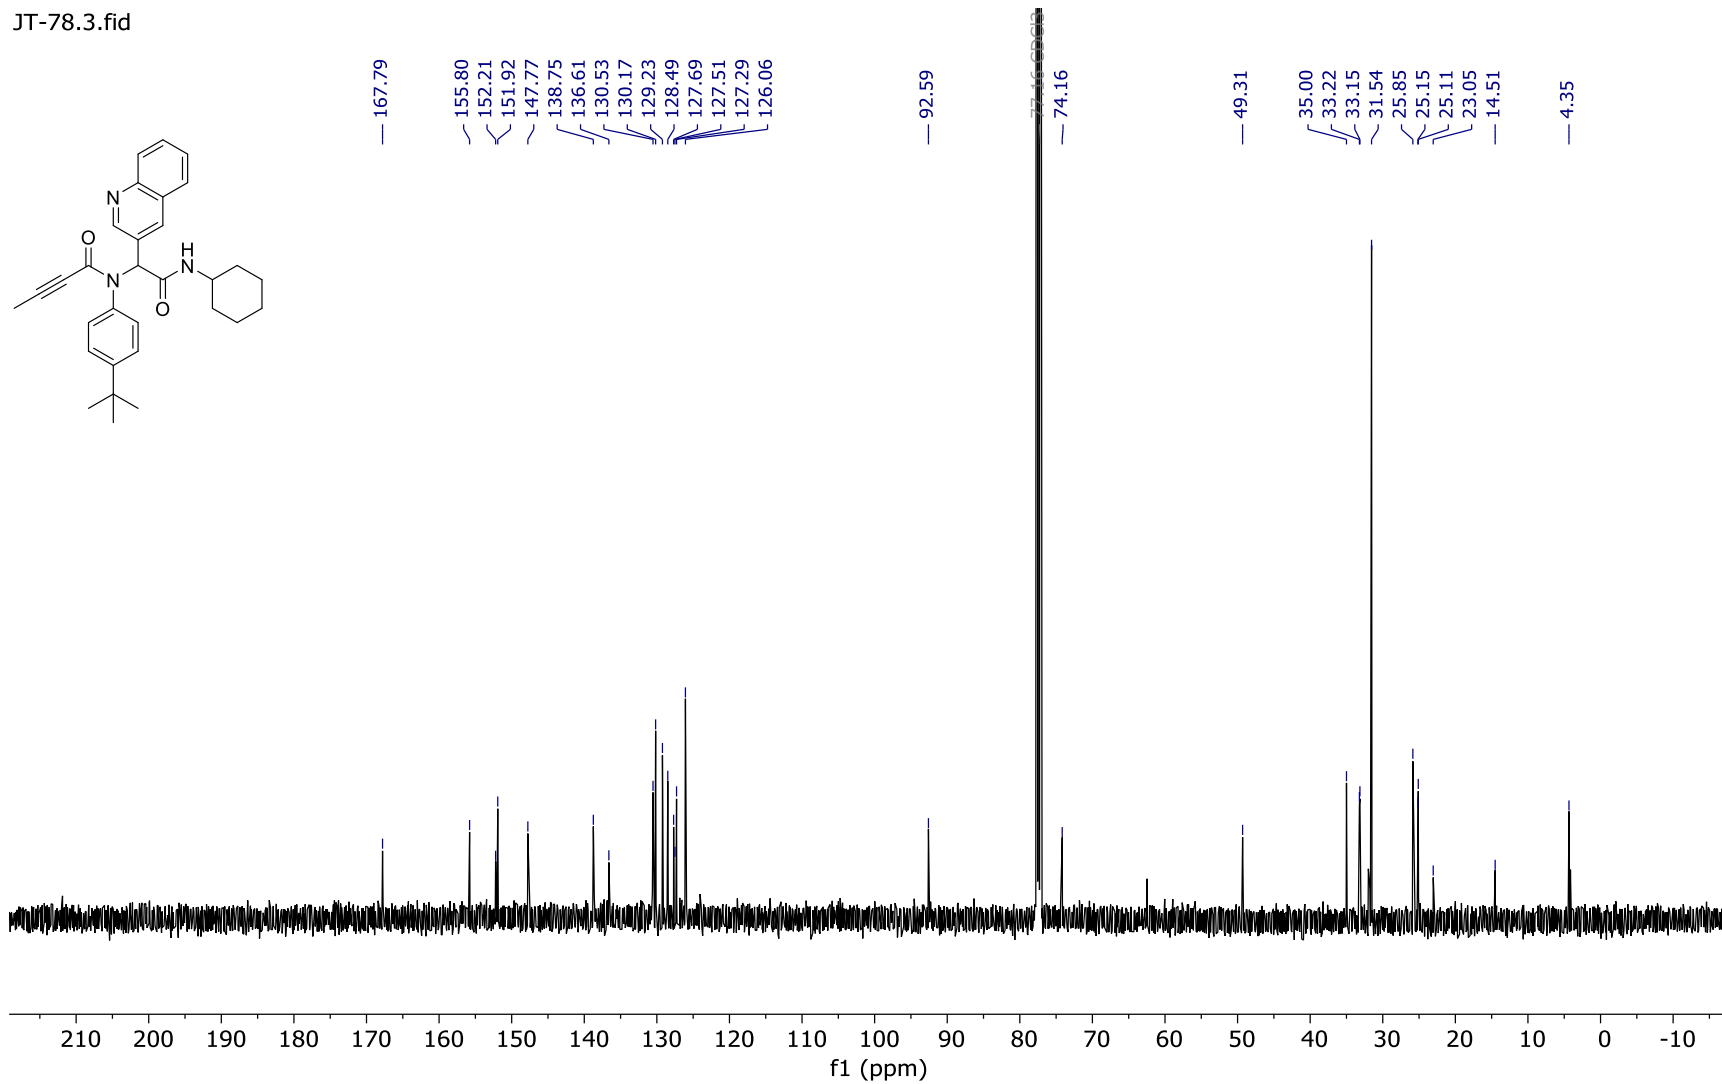

59. Compound **13g** <sup>1</sup>H NMR

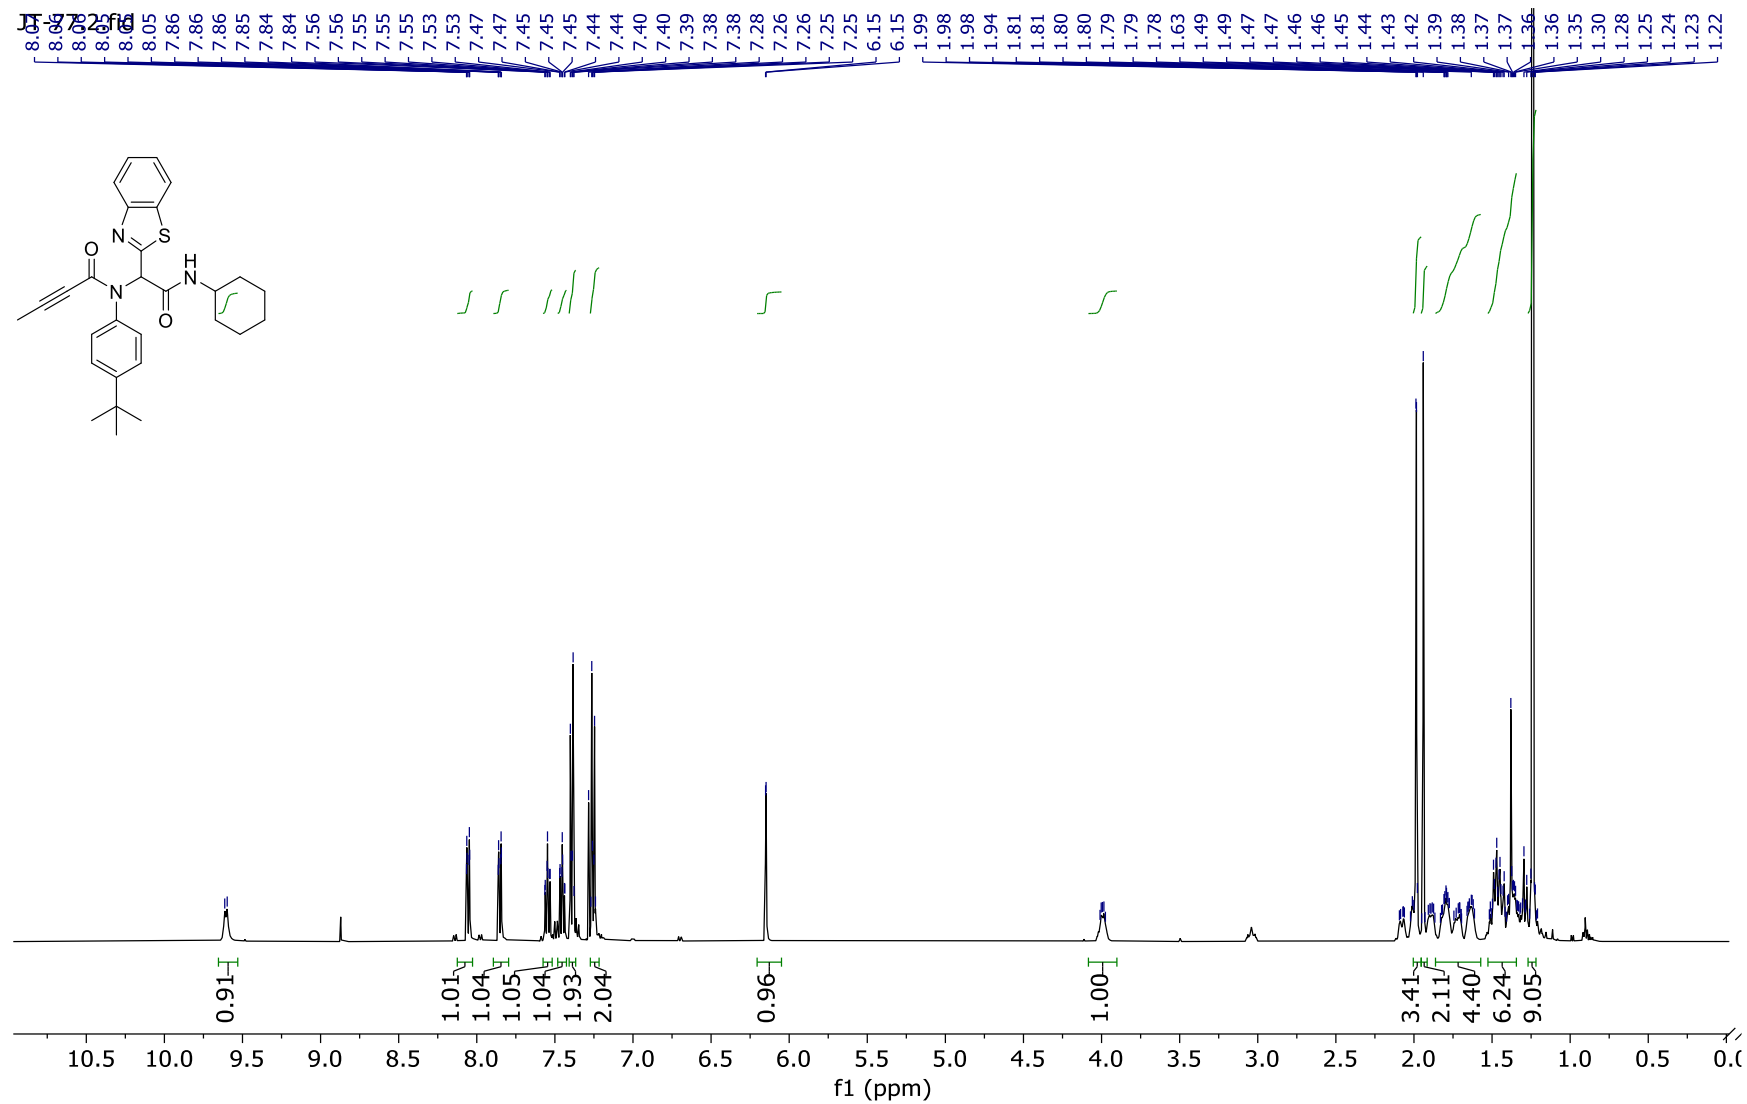

60. Compound **13g** <sup>13</sup>C NMR

JT-77.4.fid

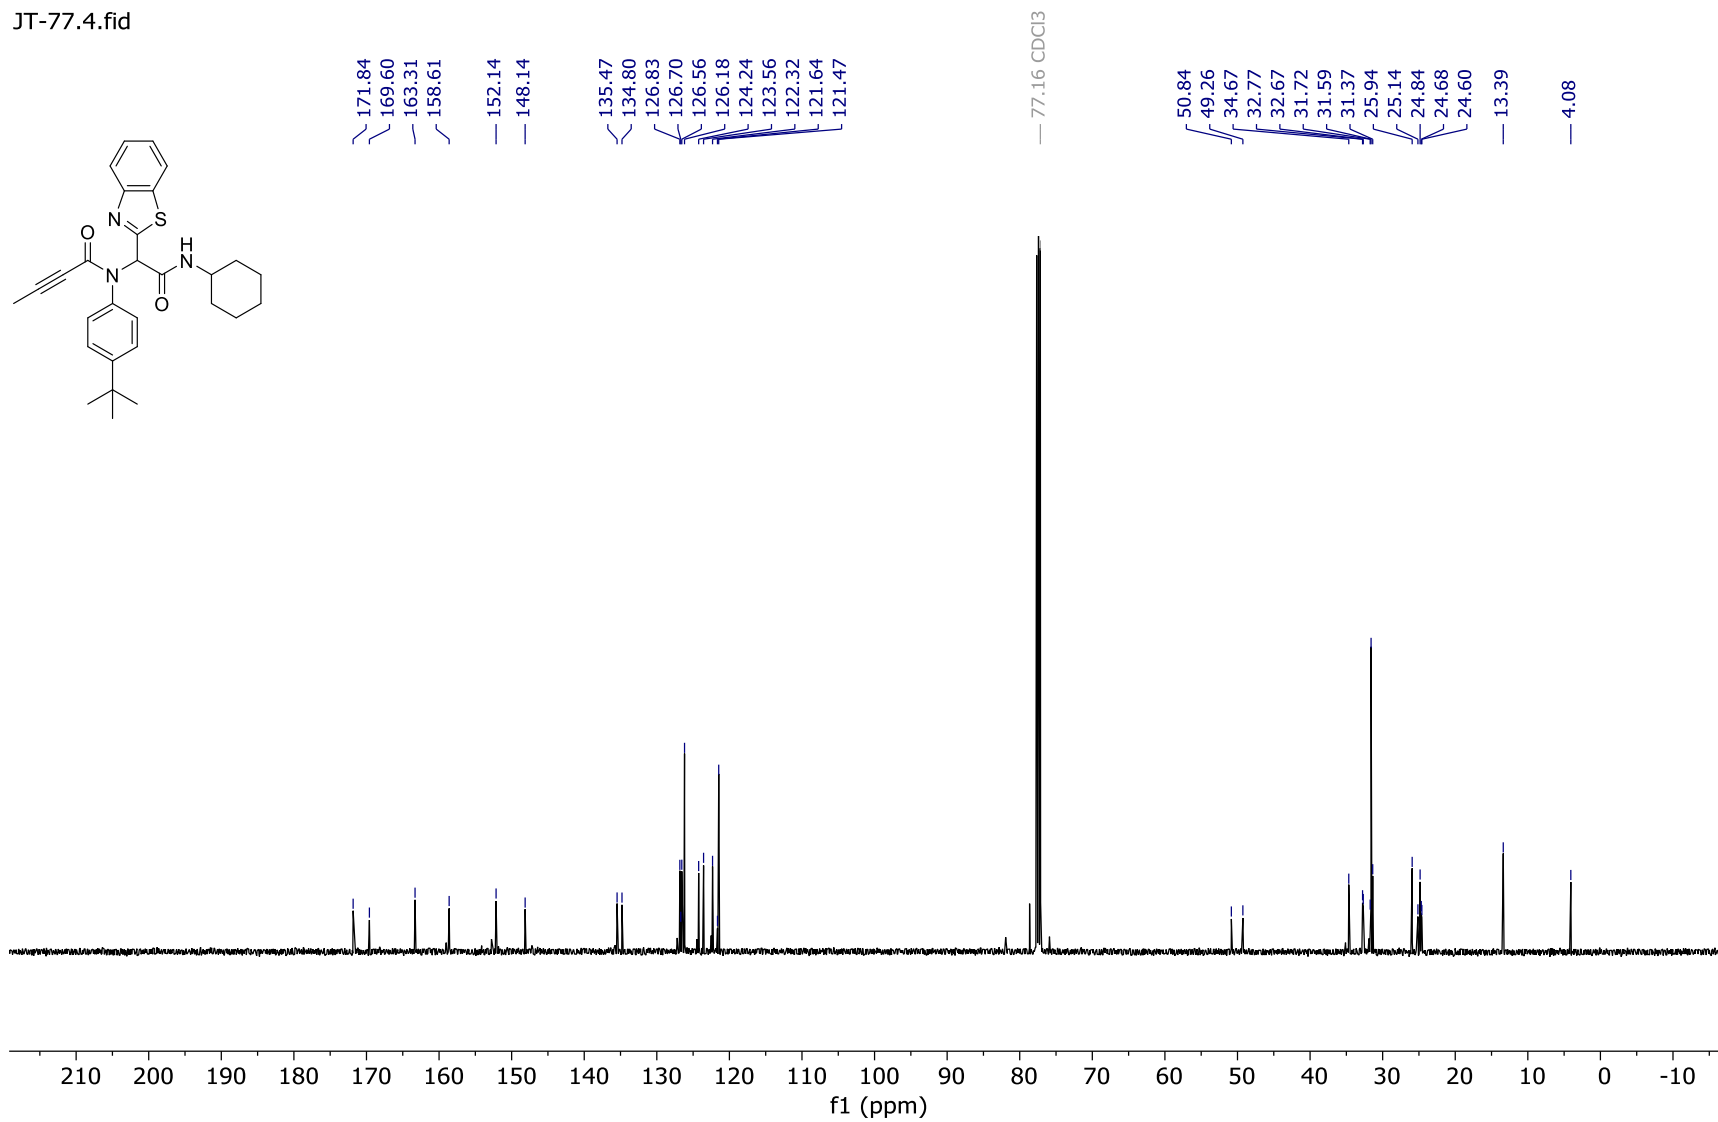



61. Compound **13h** <sup>1</sup>H NMR

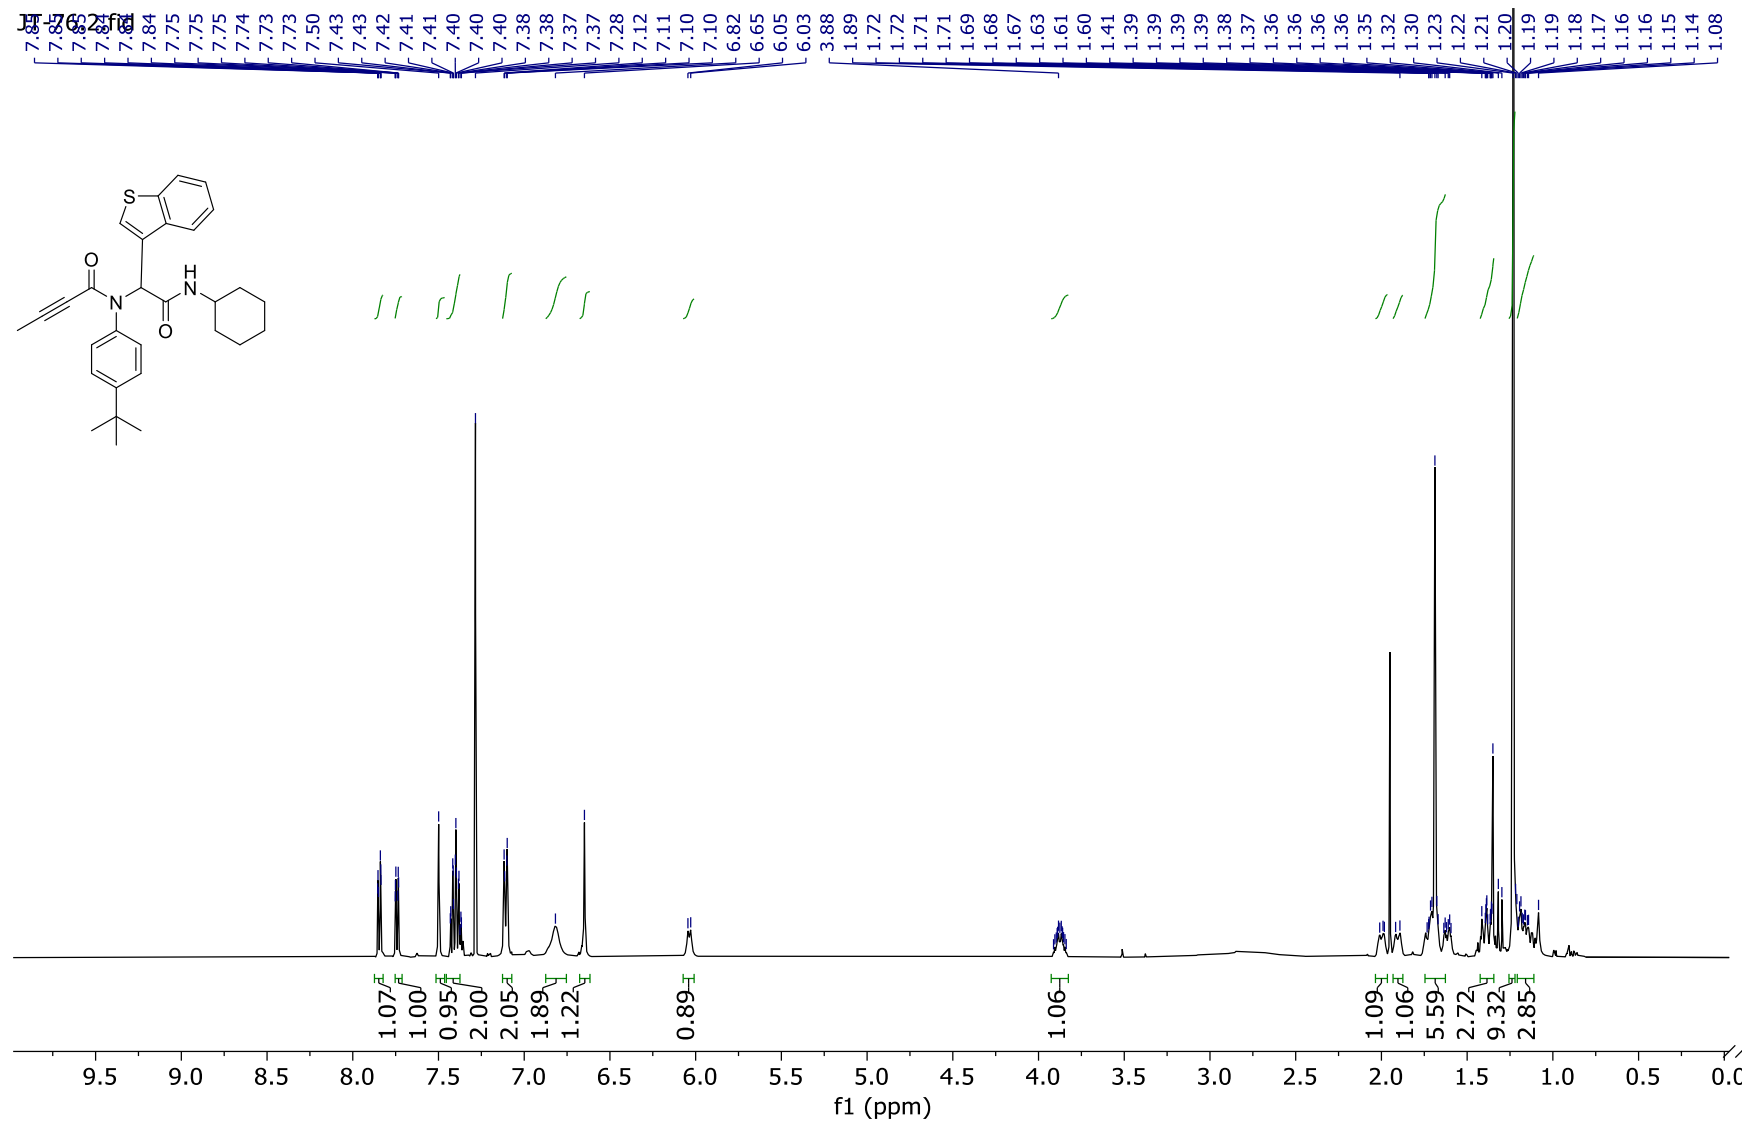

62. Compound **13h** <sup>13</sup>C NMR

JT-76.3.fid

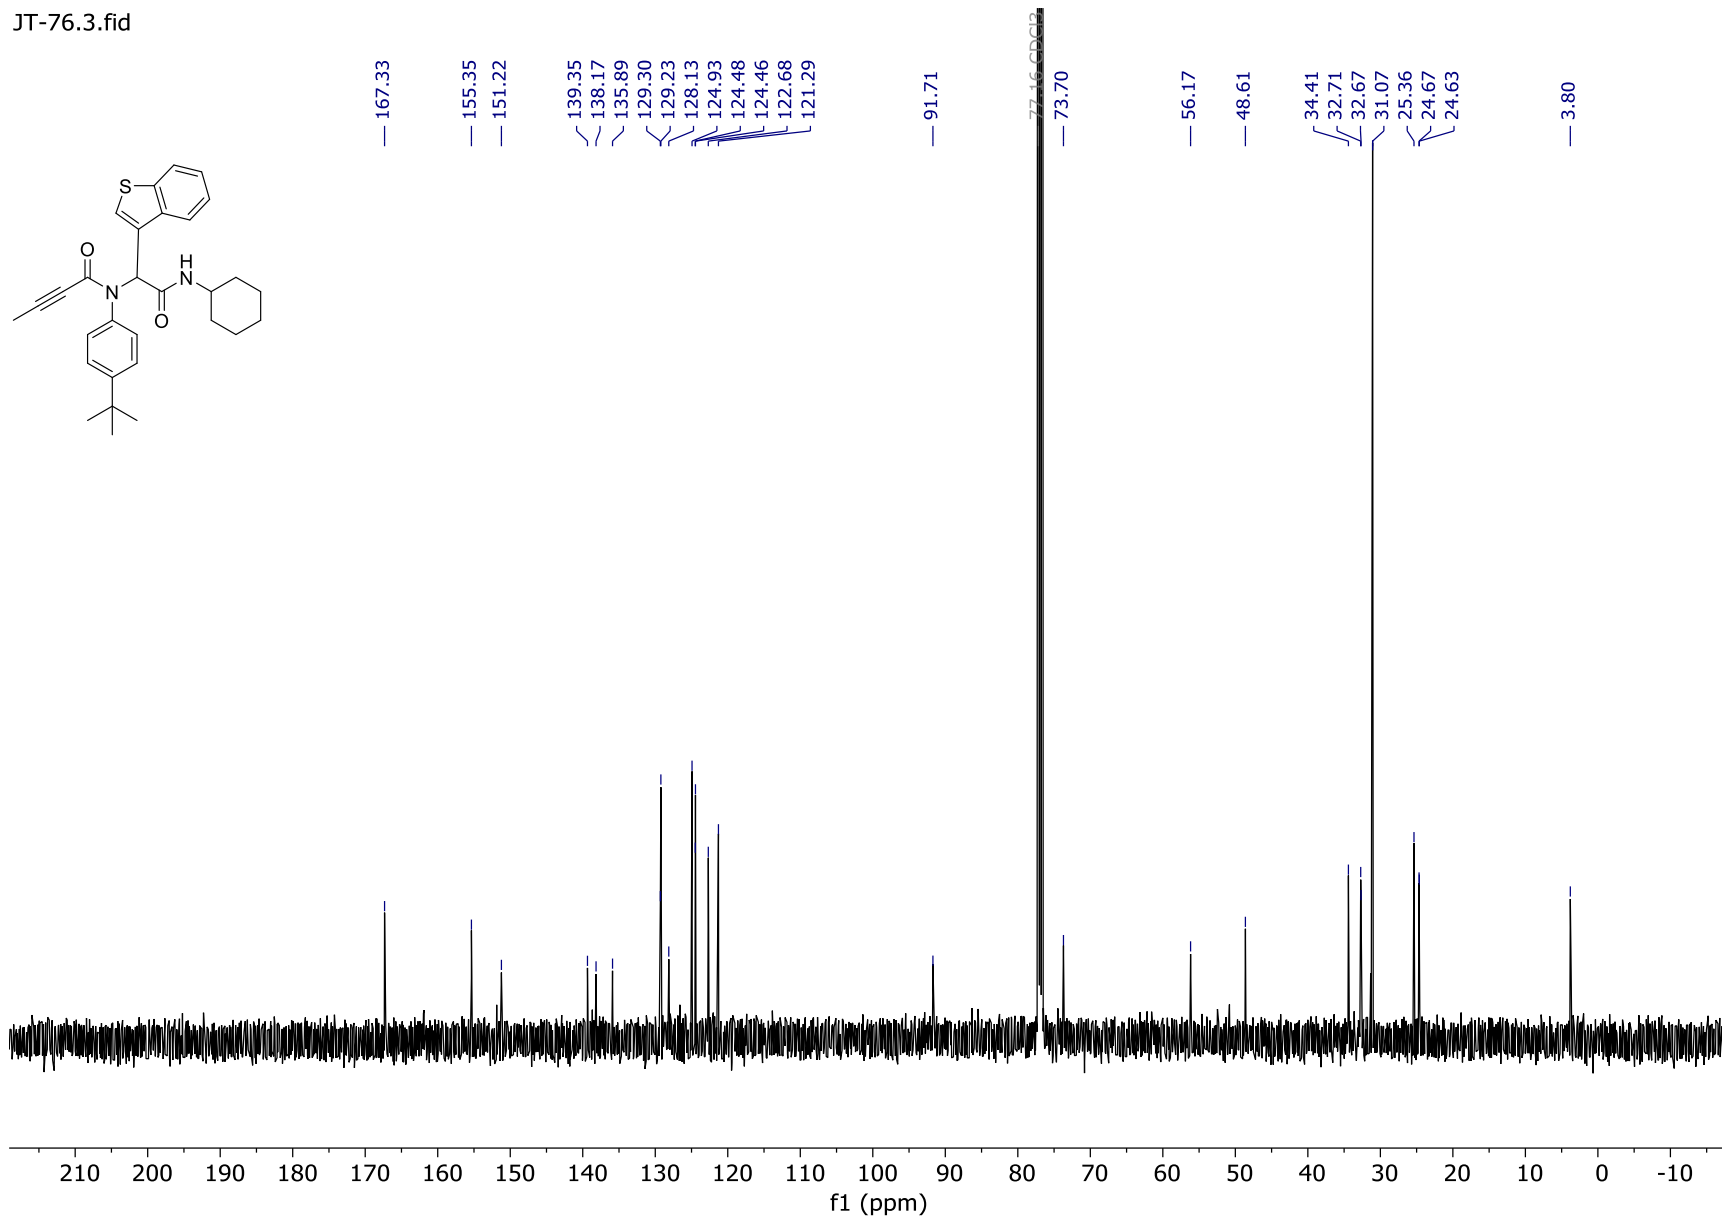

63. Compound **13i** <sup>1</sup>H NMR

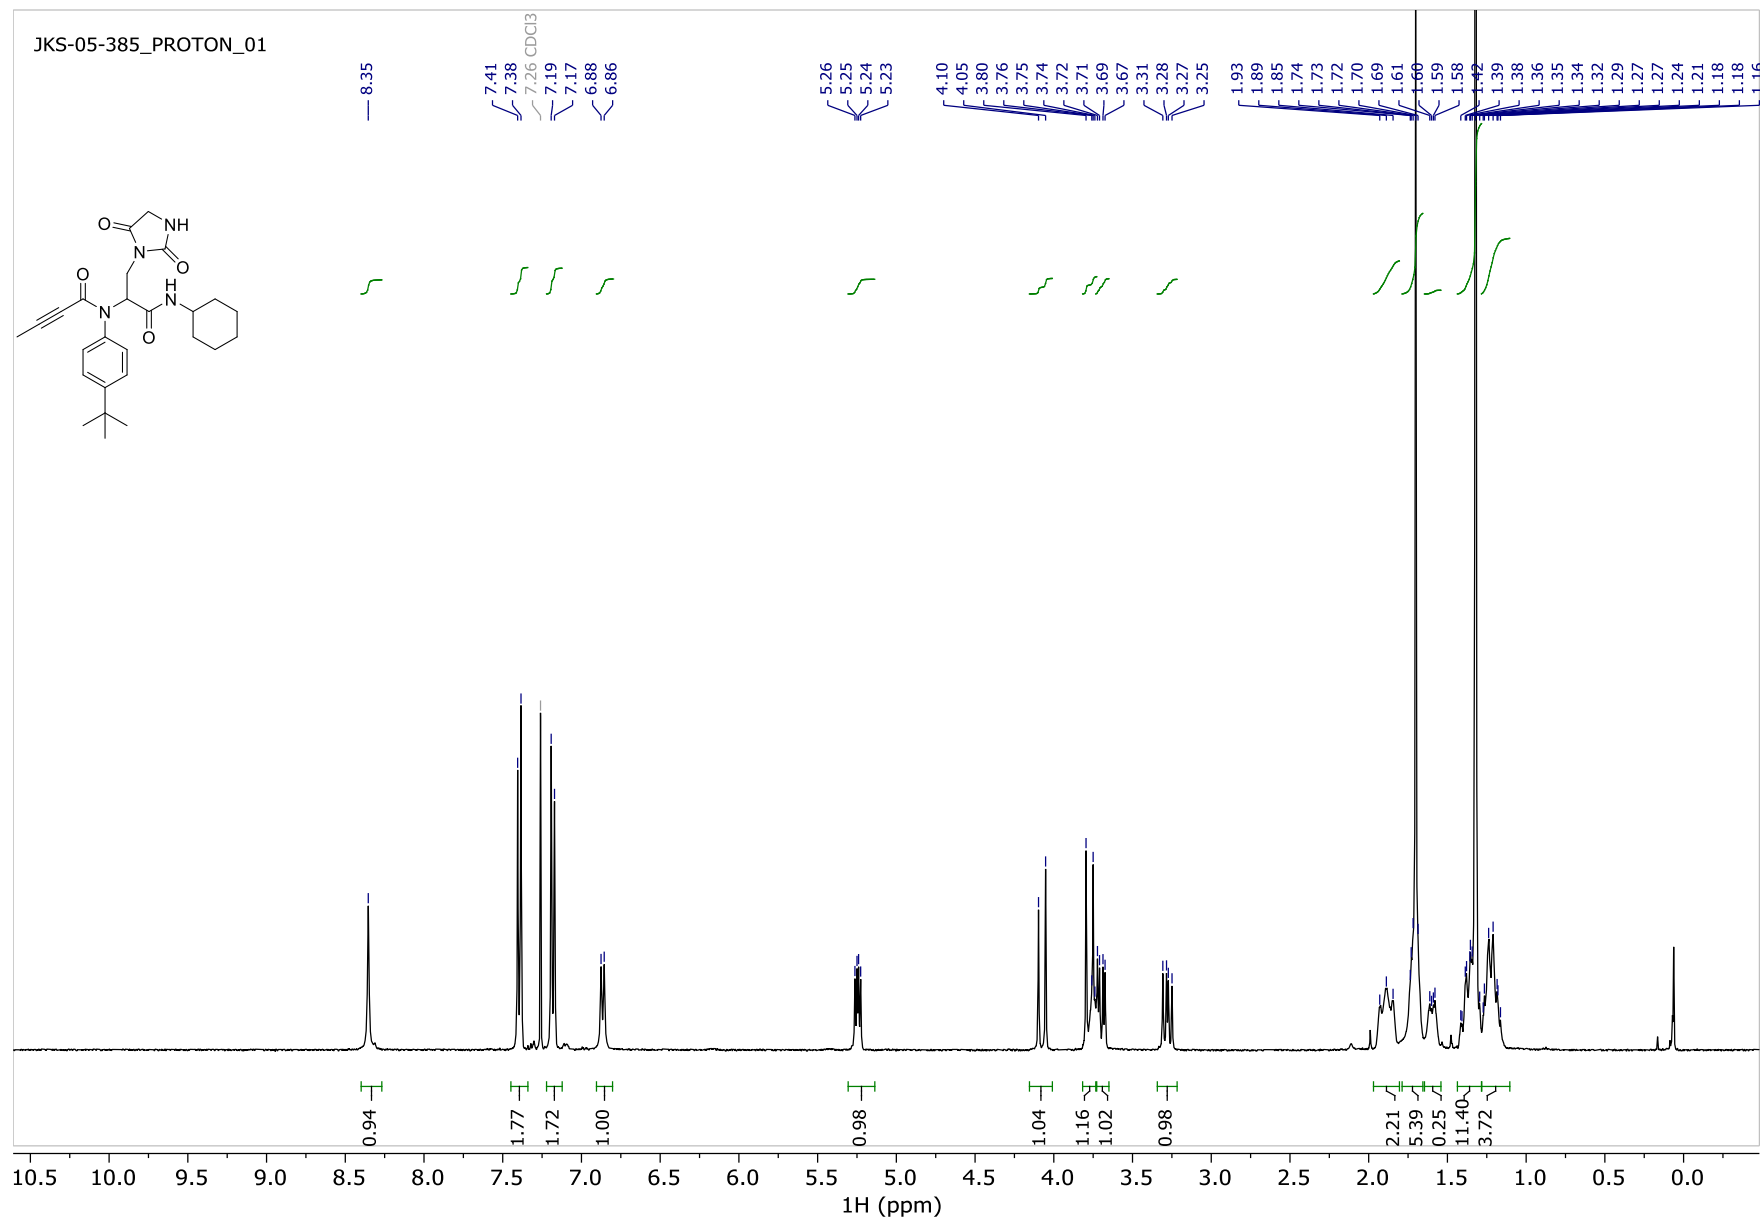

64. Compound **13i** <sup>13</sup>C NMR

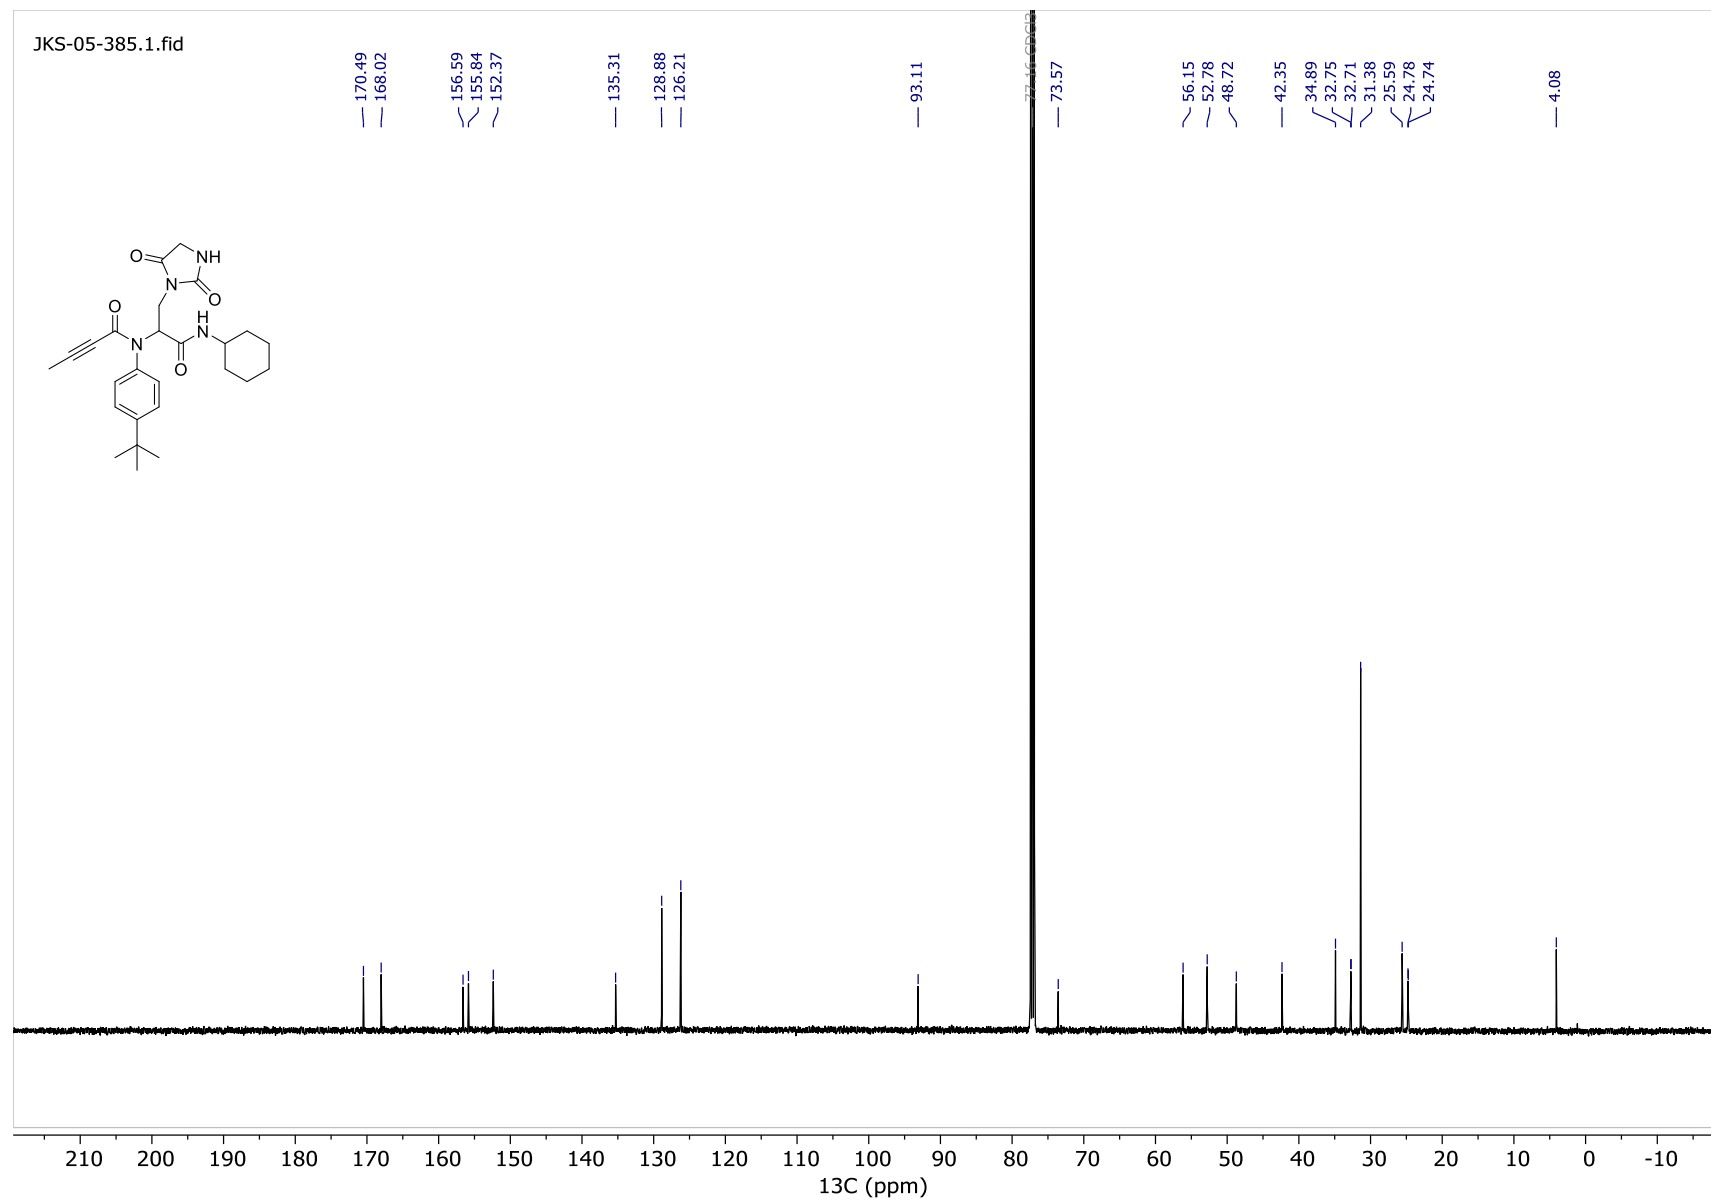

65. Compound **13j** <sup>1</sup>H NMR

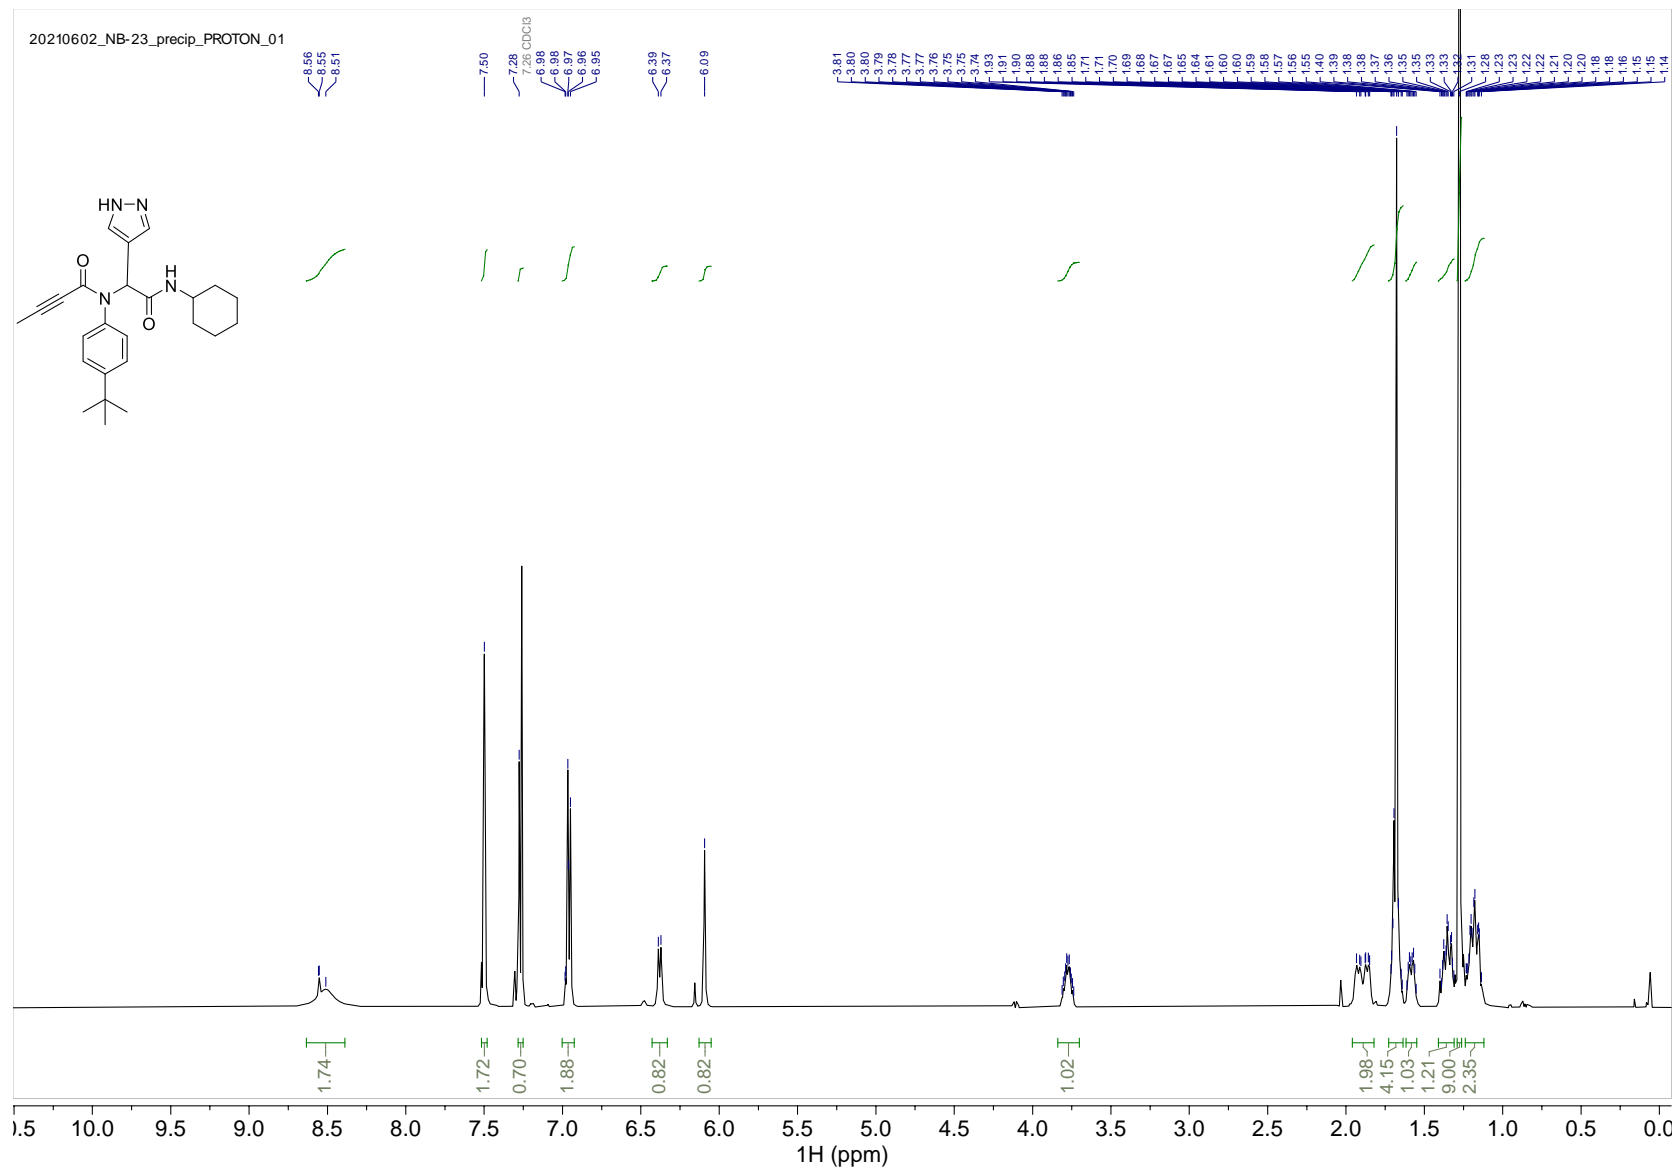

66. Compound **13j** <sup>13</sup>C NMR

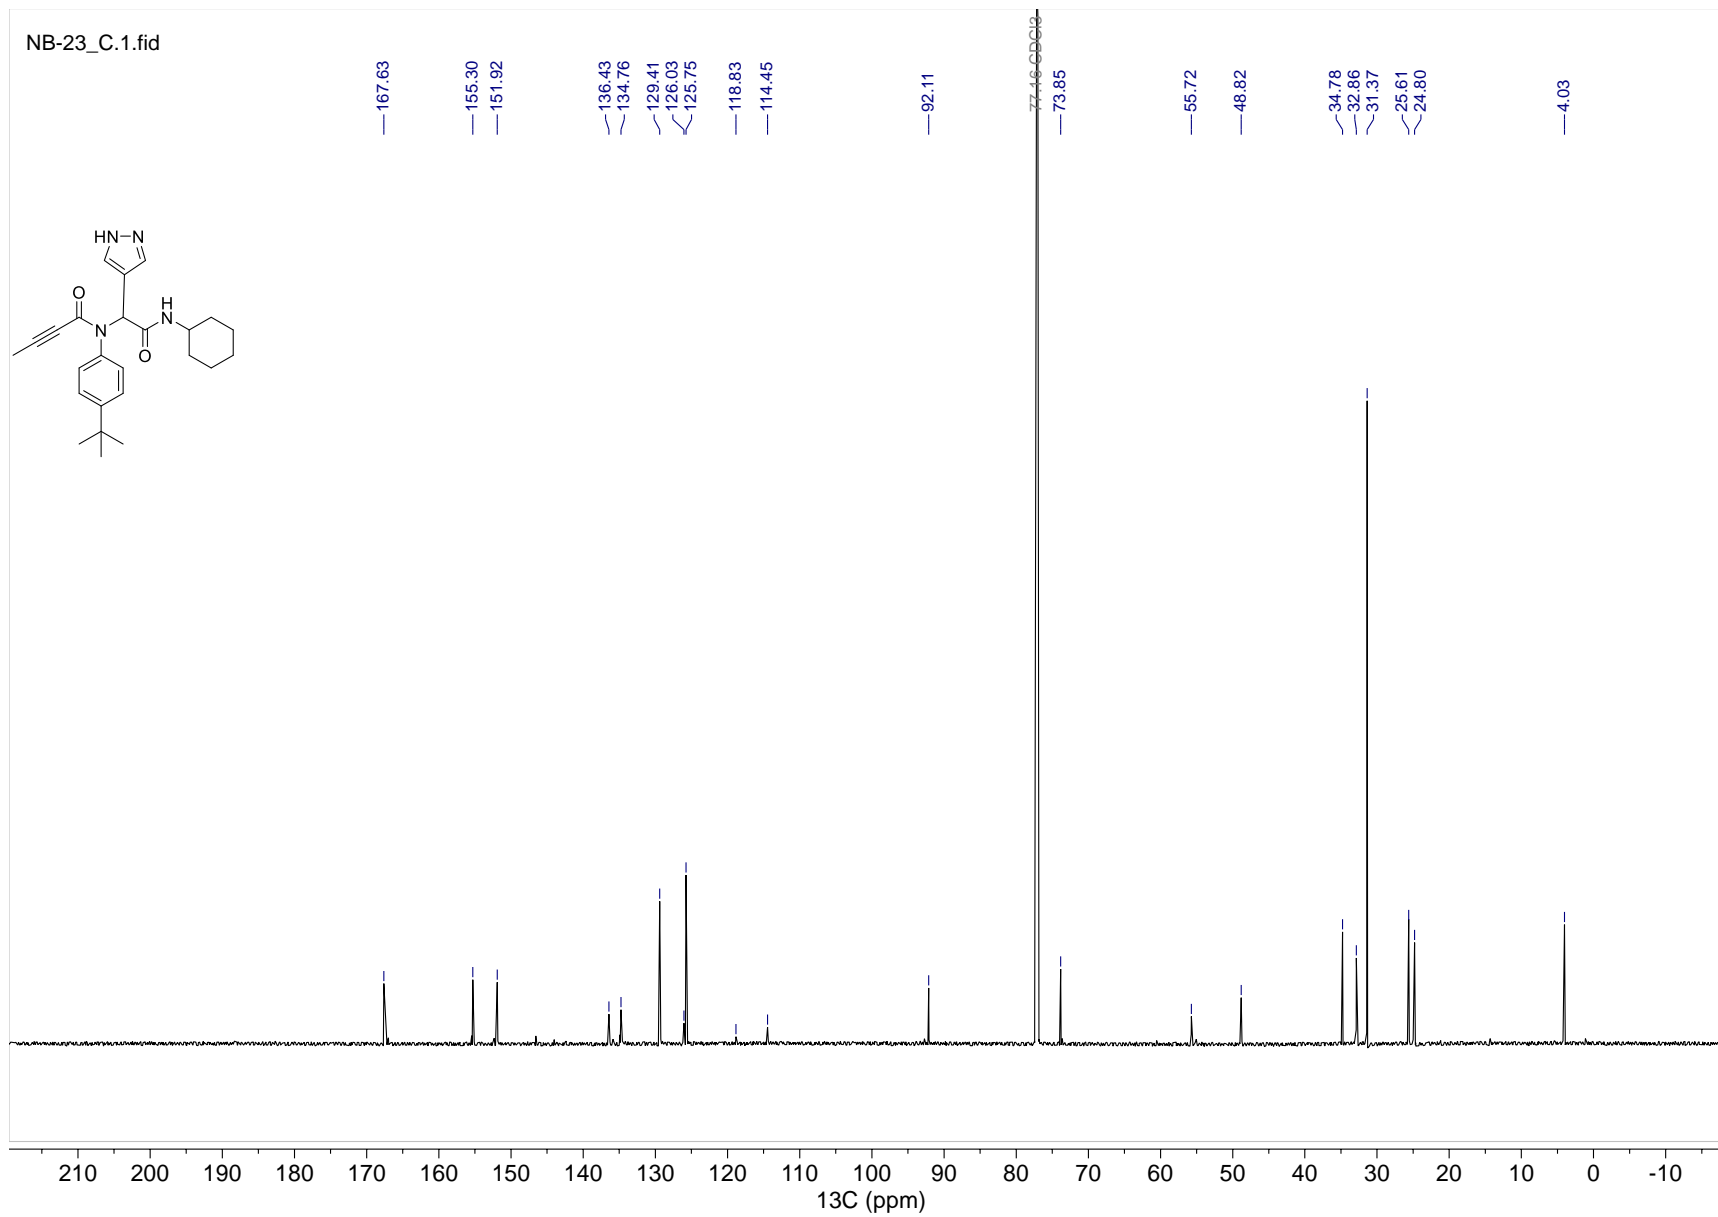

67. Compound **13k** <sup>1</sup>H NMR

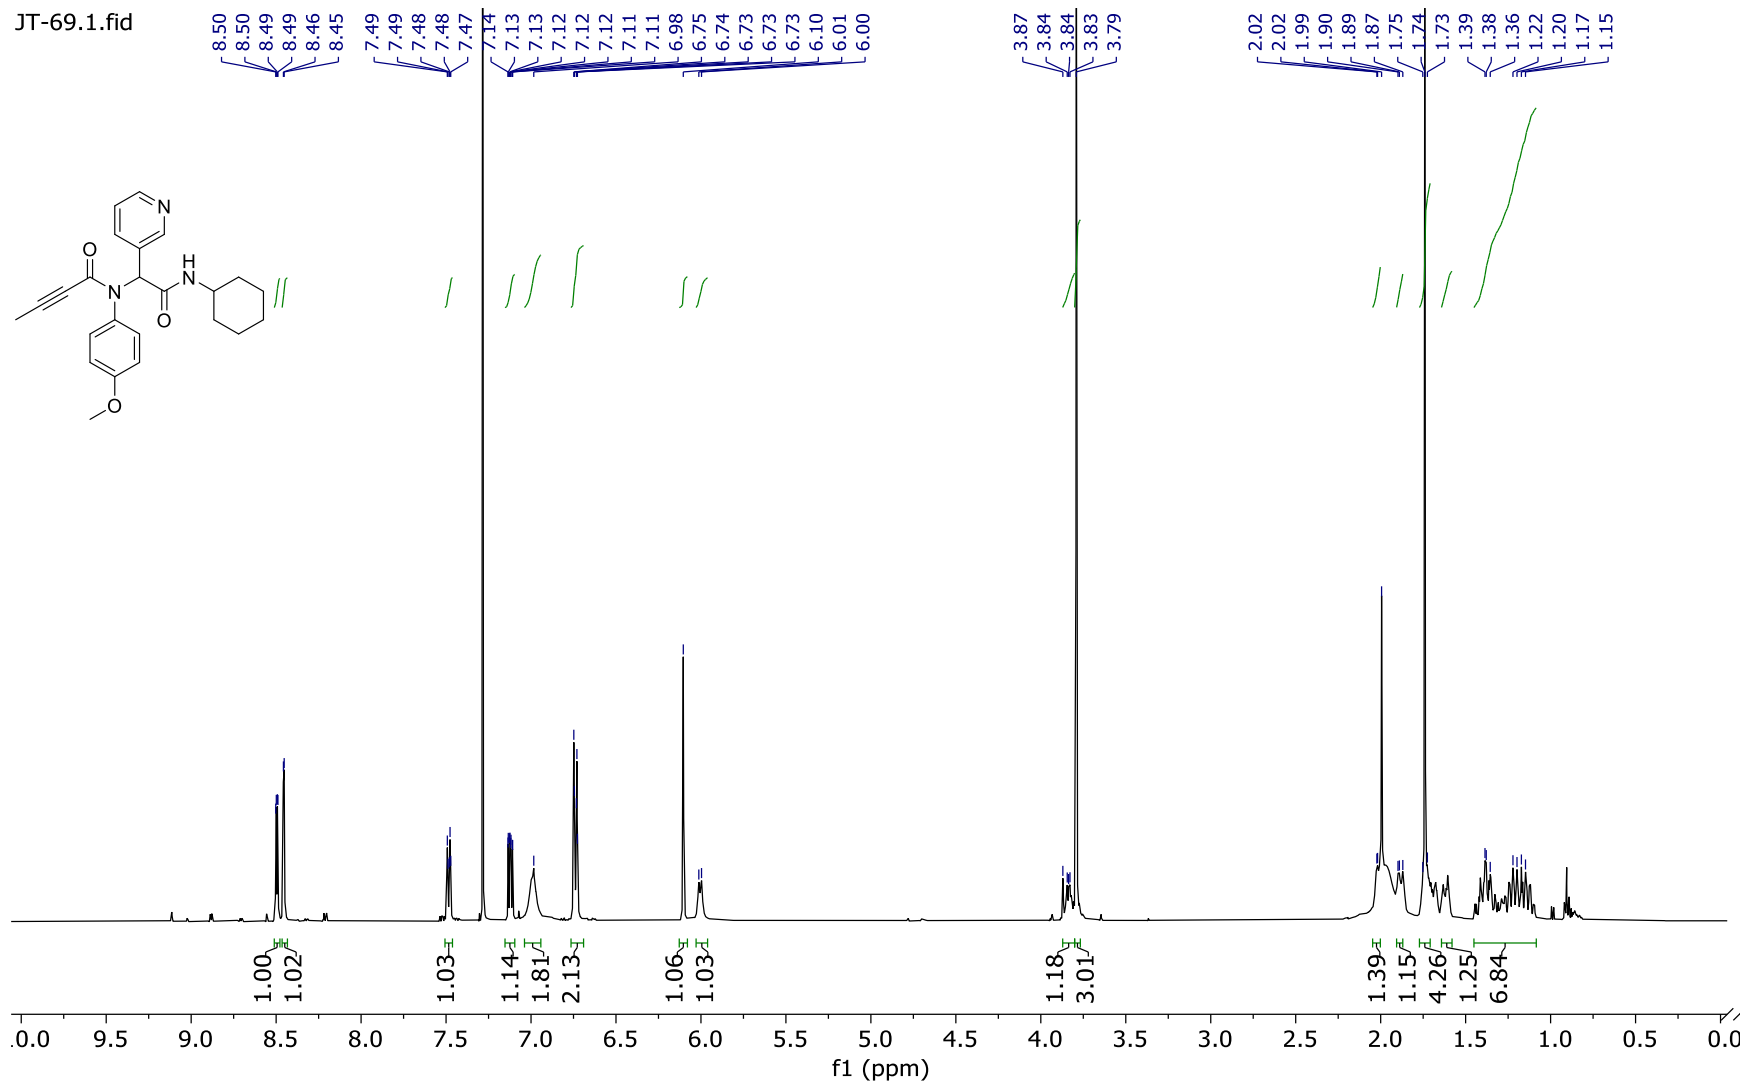

68. Compound **13k** <sup>13</sup>C NMR

JT-69.2.fid

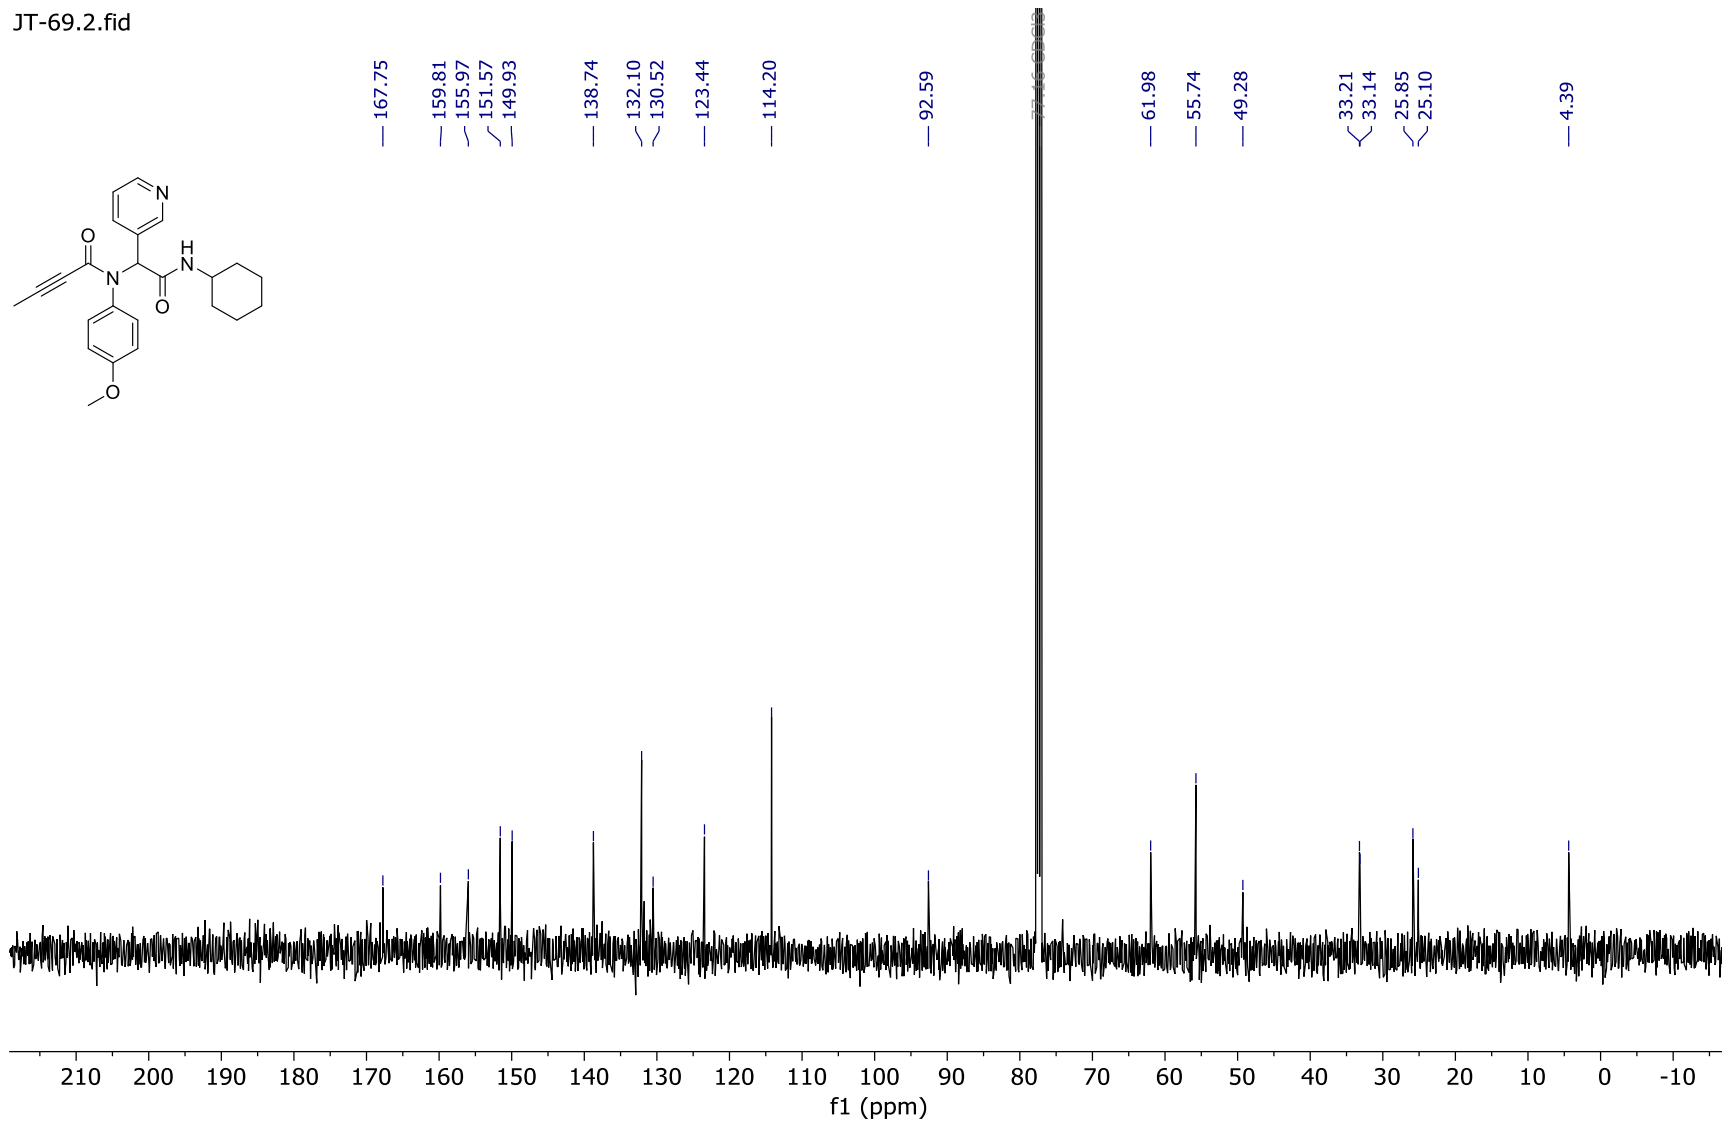



69. Compound **131** <sup>1</sup>H NMR

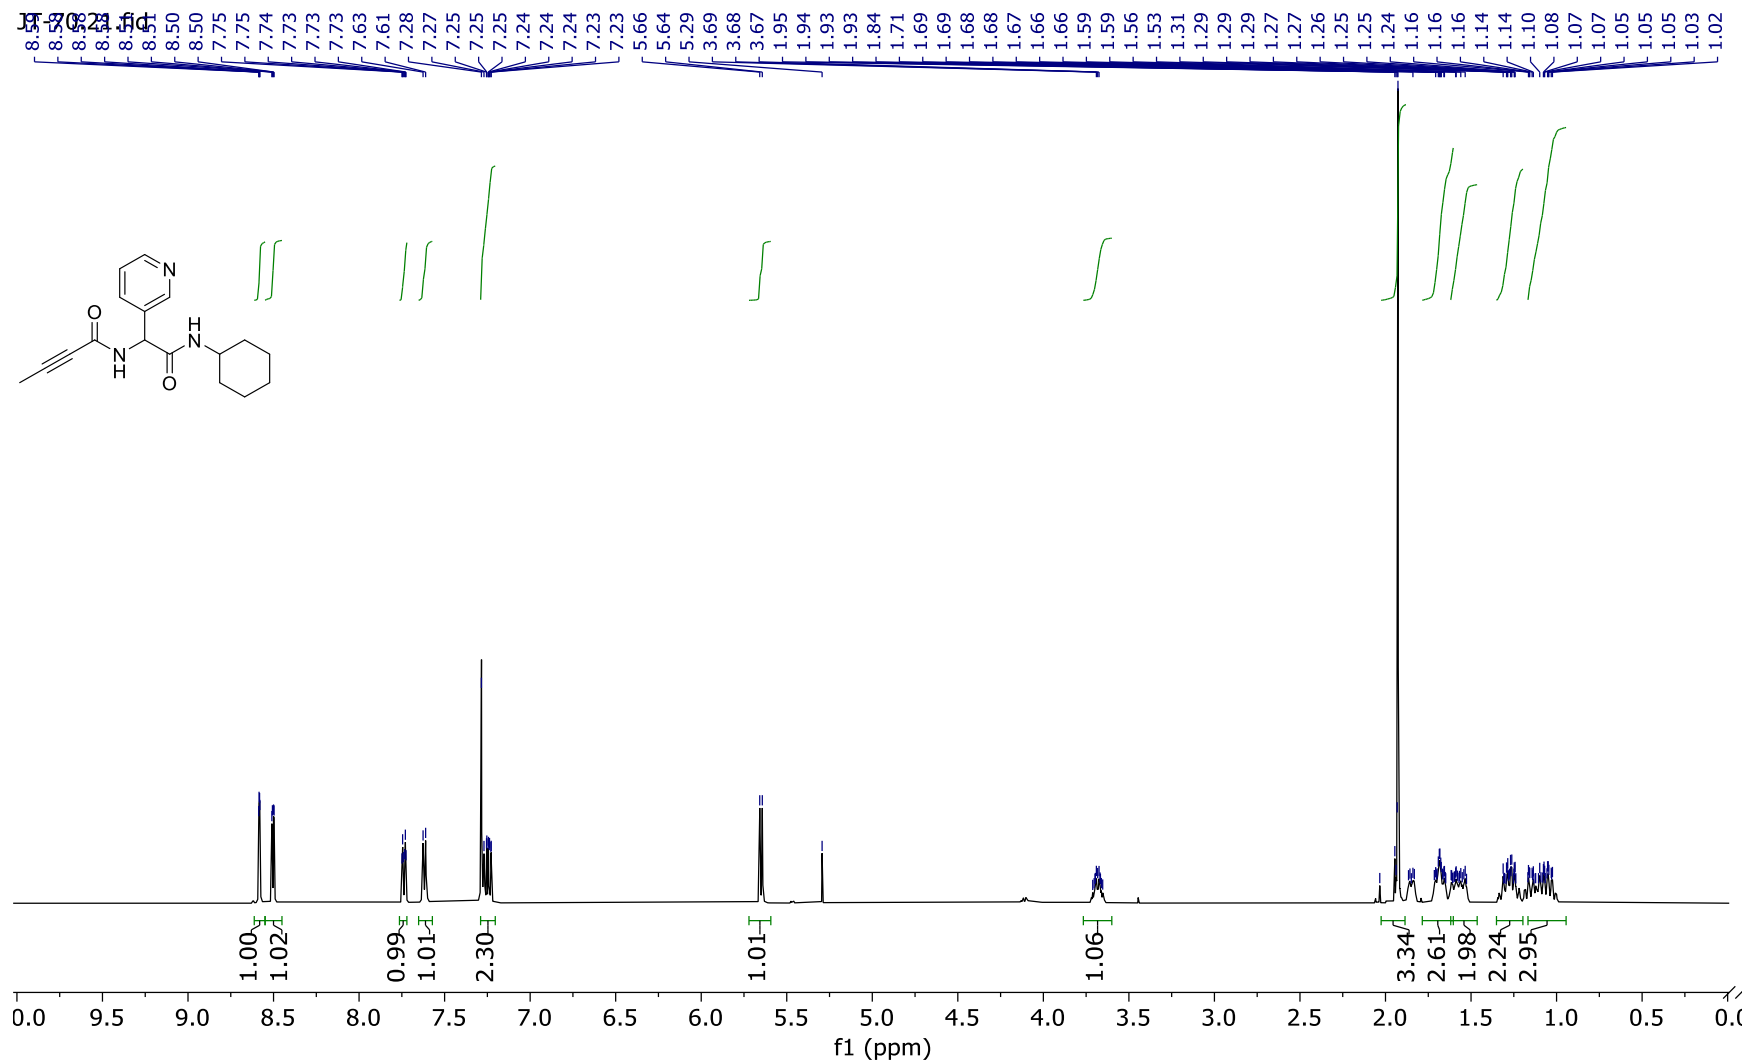

70. Compound **13I** <sup>13</sup>C NMR

JT-70.22.fid

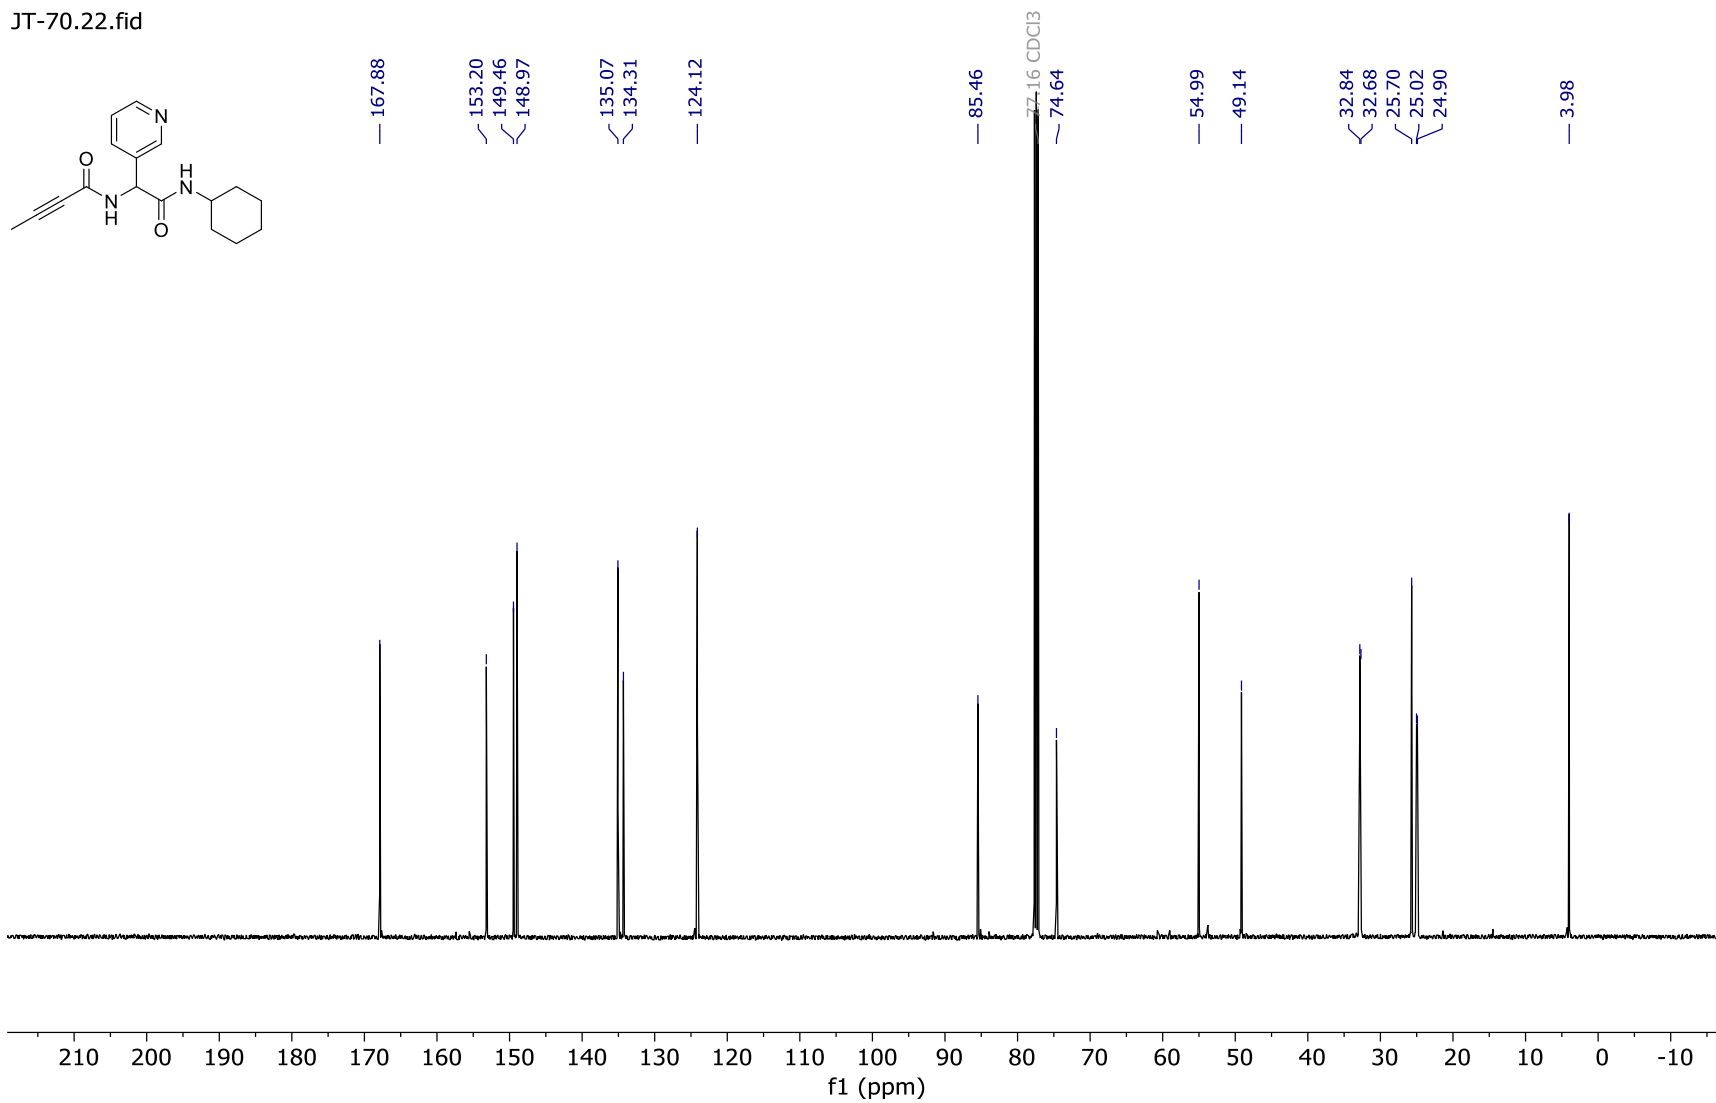

71. Compound **13m** <sup>1</sup>H NMR

JT-71.3.fid

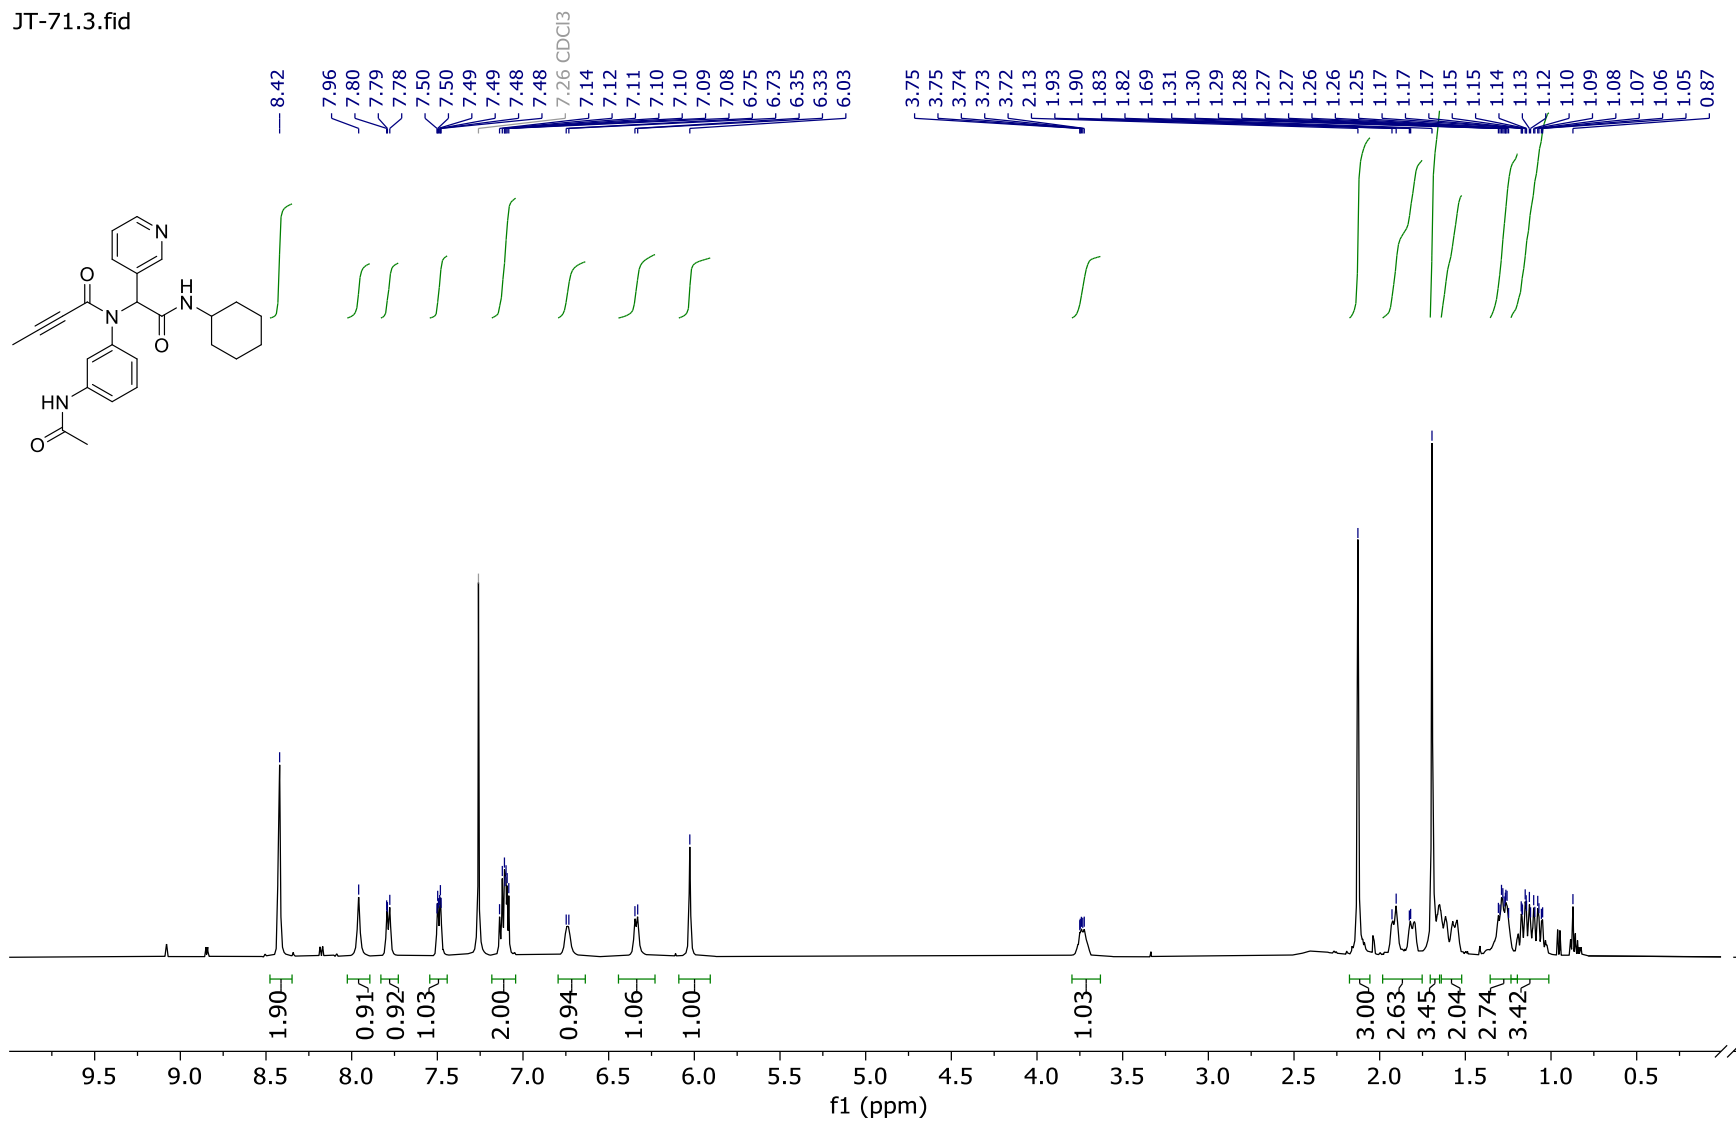

72. Compound **13m** <sup>13</sup>C NMR

JT-71.22.fid  
Moitessier  
1d\_C13 CDCl3 E:\\ tjutrins 11

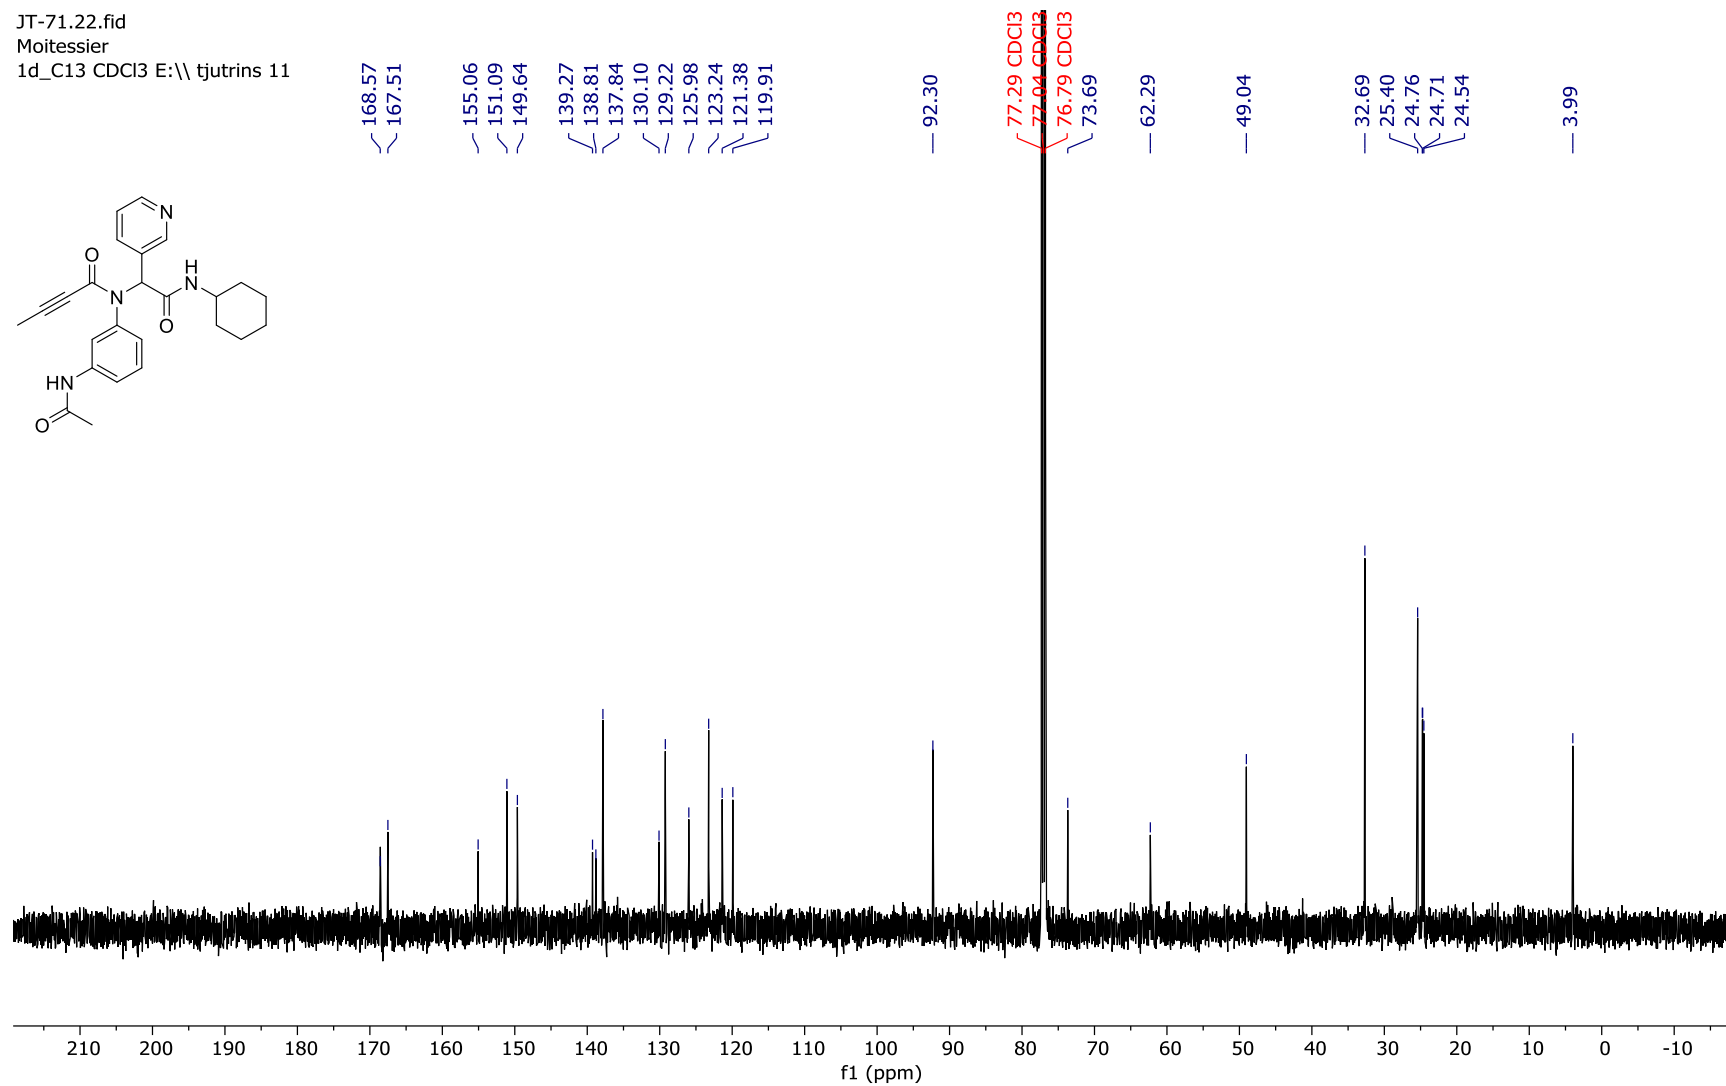

73. Compound 13n <sup>1</sup>H NMR

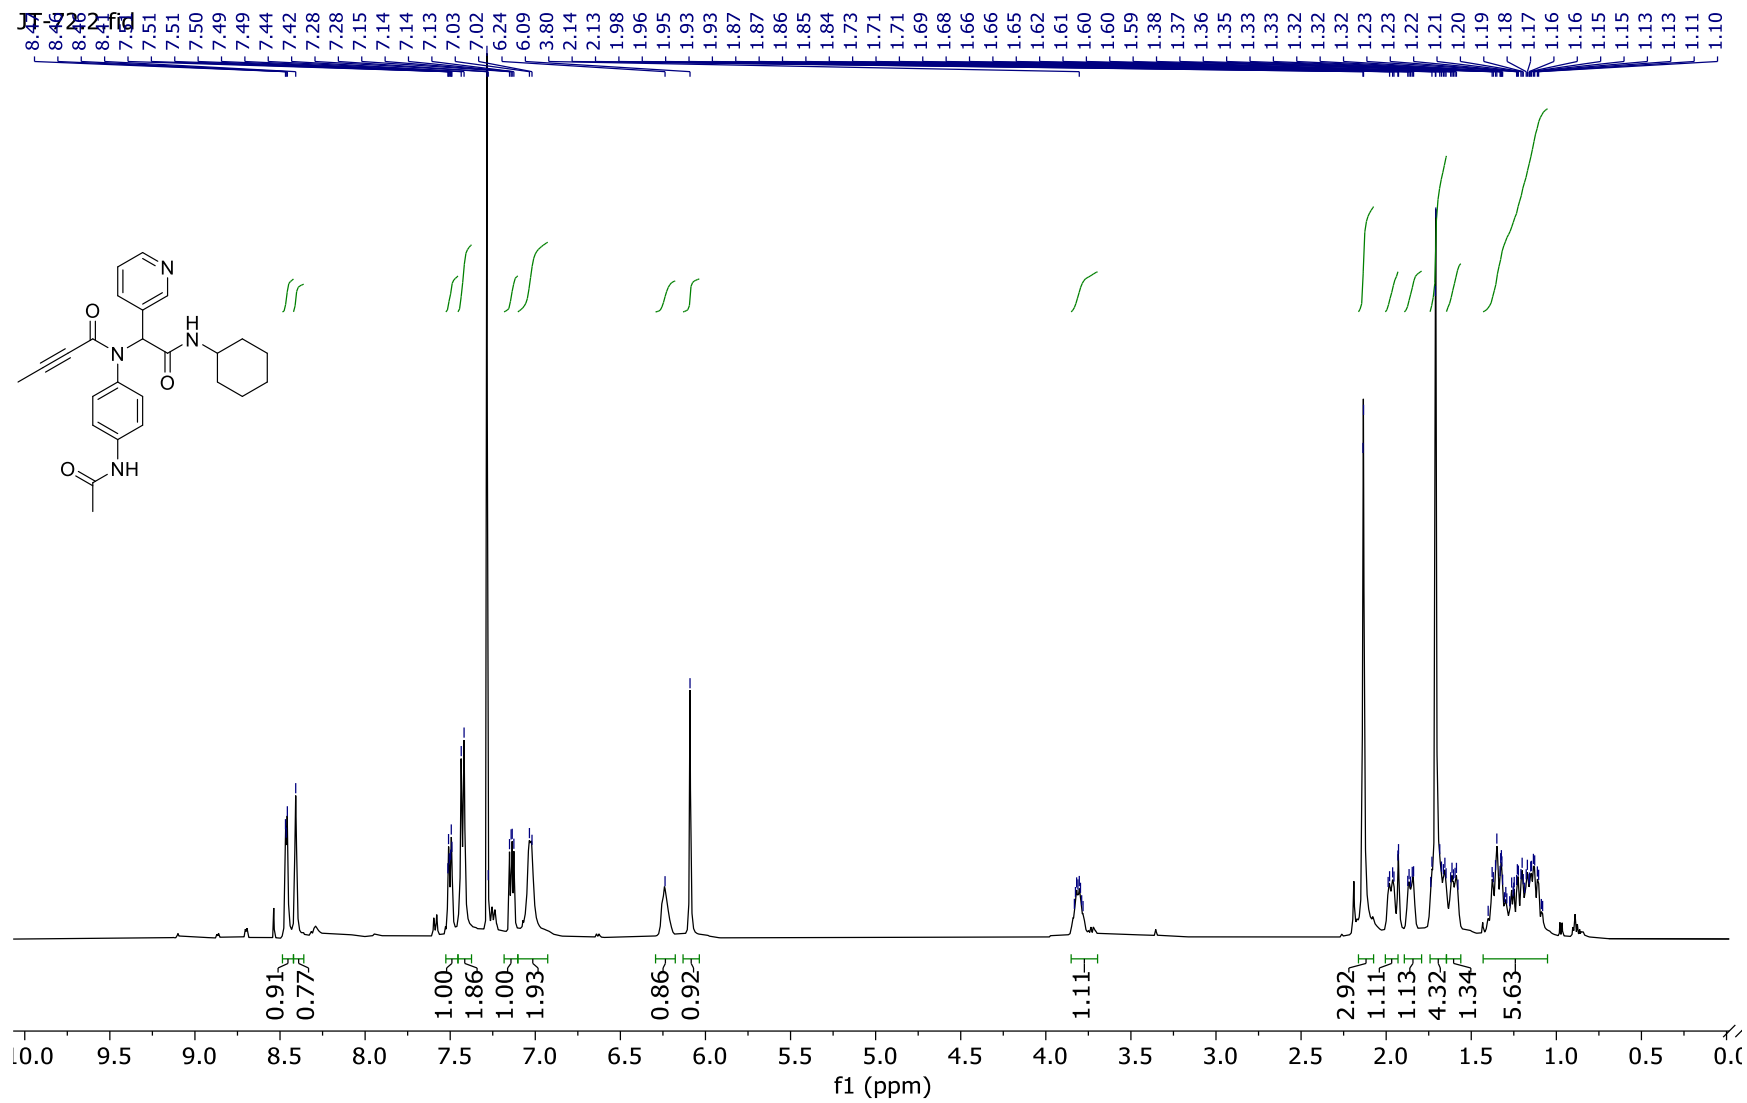

74. Compound **13n** <sup>13</sup>C NMR

JT-72.22.fid

Moitessier

1d\_C13 CDCl3 E:\\ tjutrins 12

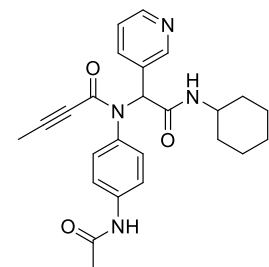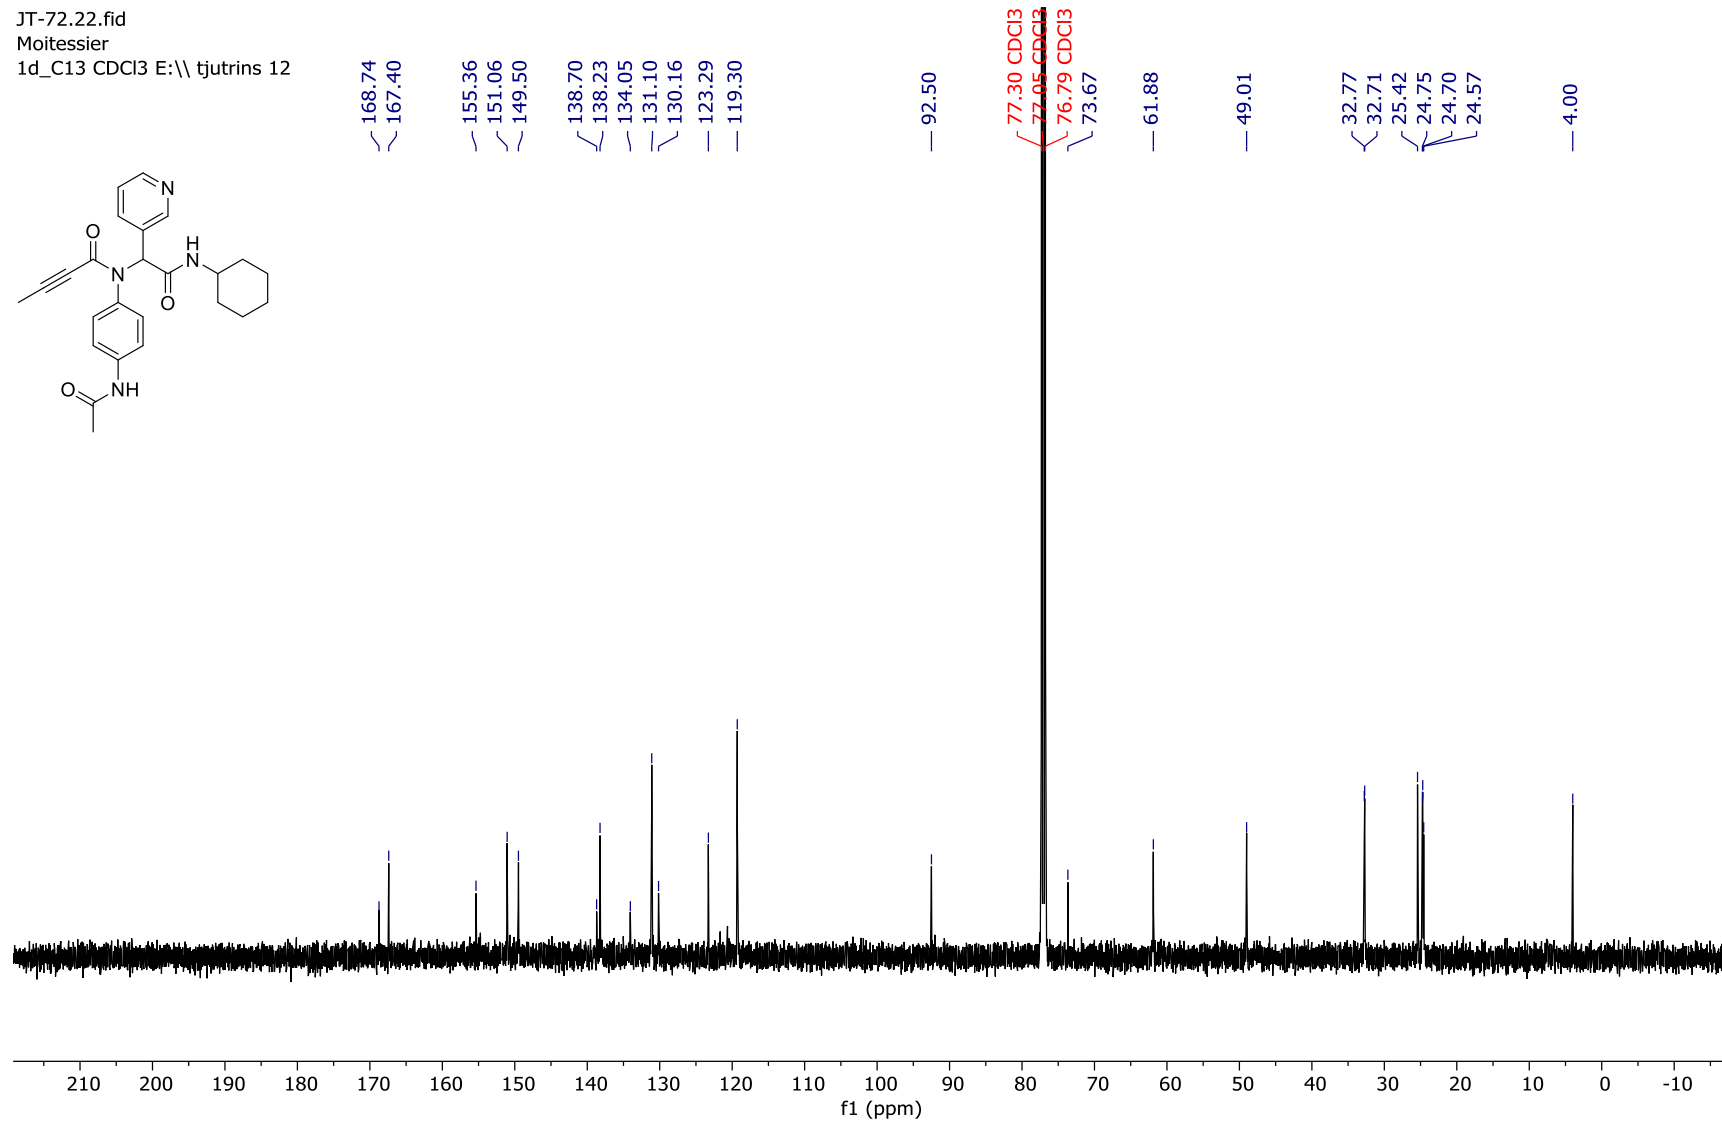

75. Compound **13o** <sup>1</sup>H NMR

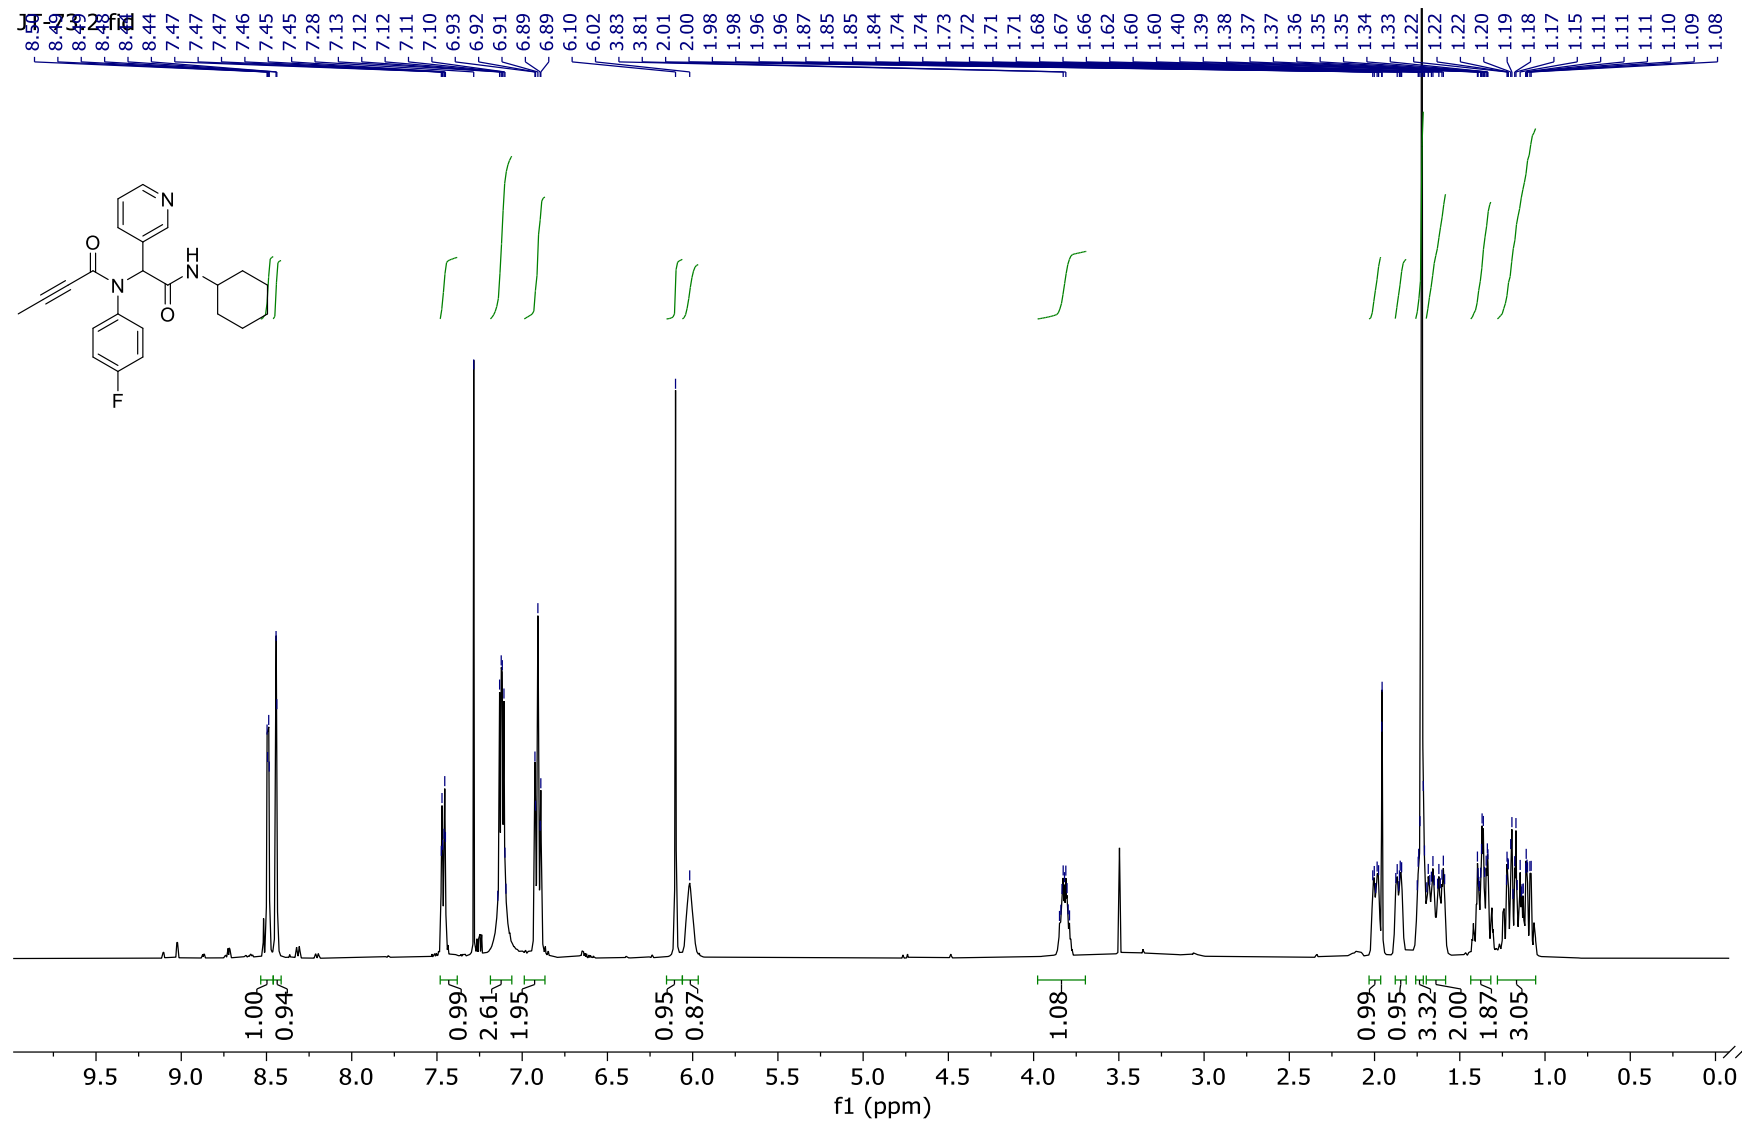

76. Compound **13o** <sup>13</sup>C NMR

JT-73.3.fid

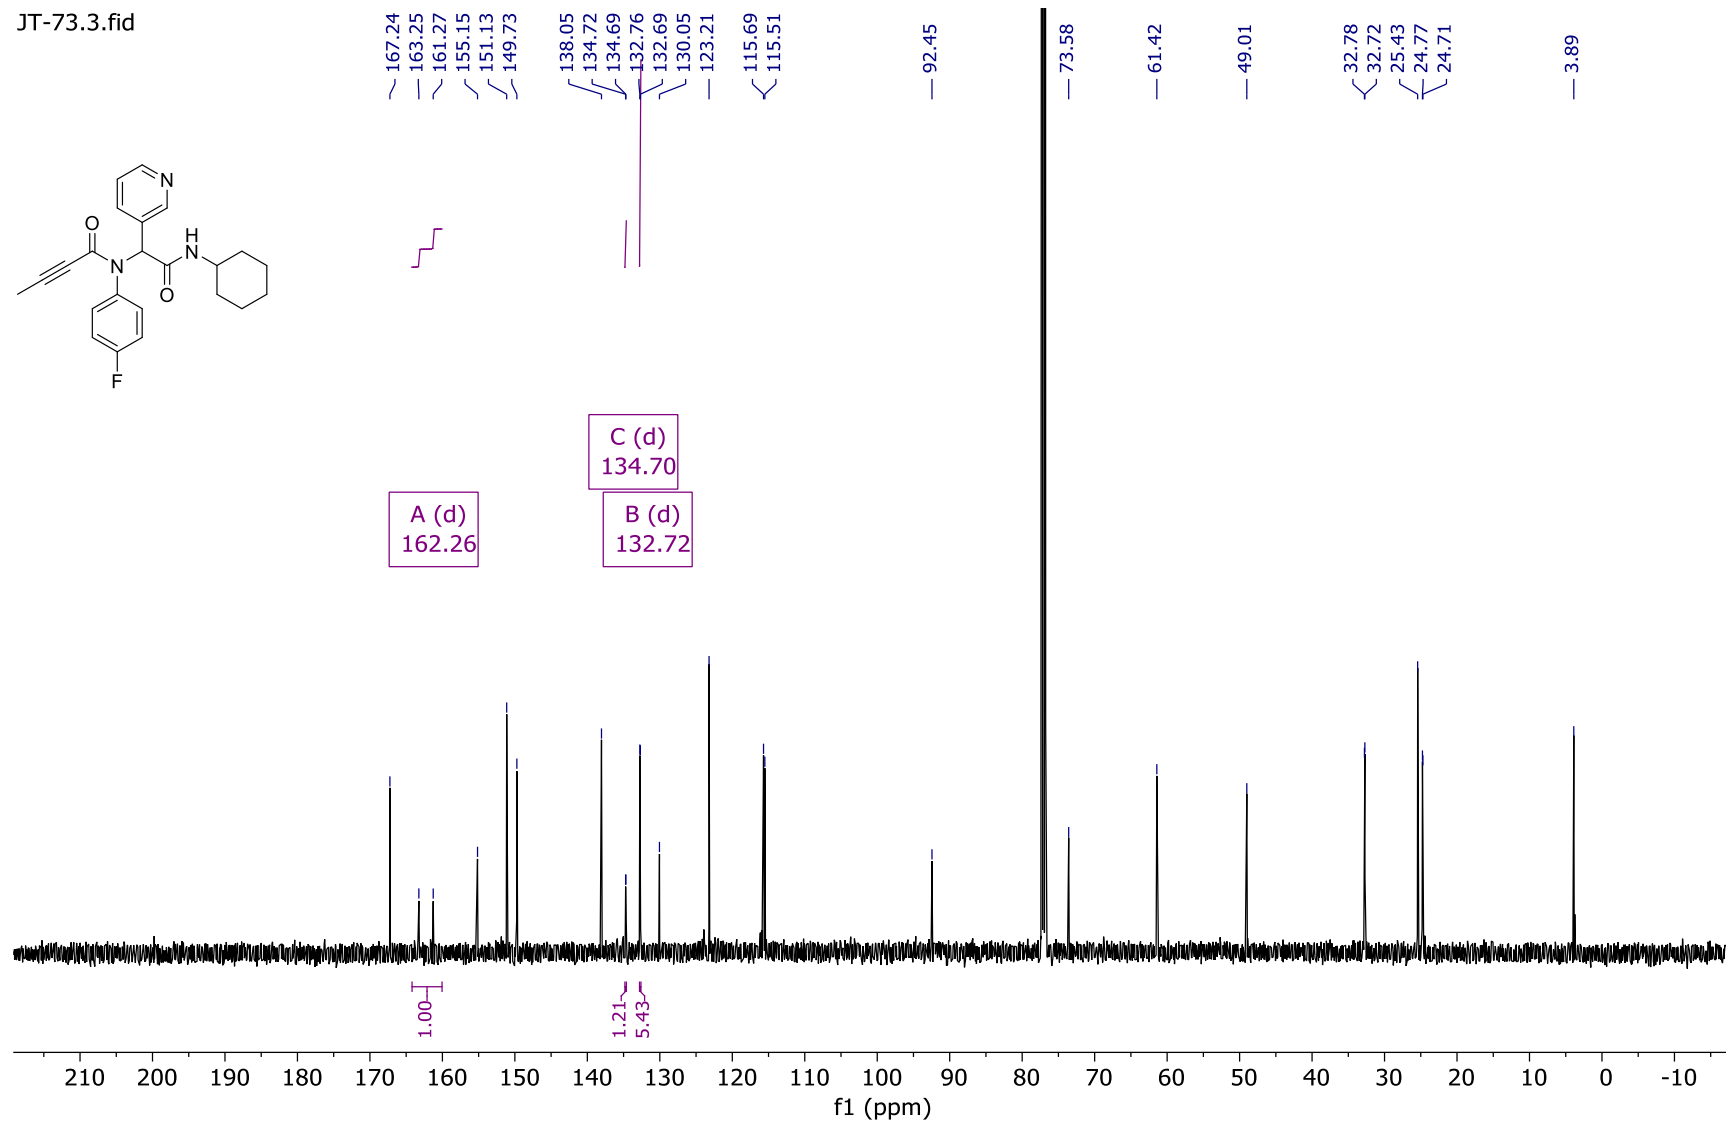



77. Compound **13p** <sup>1</sup>H NMR

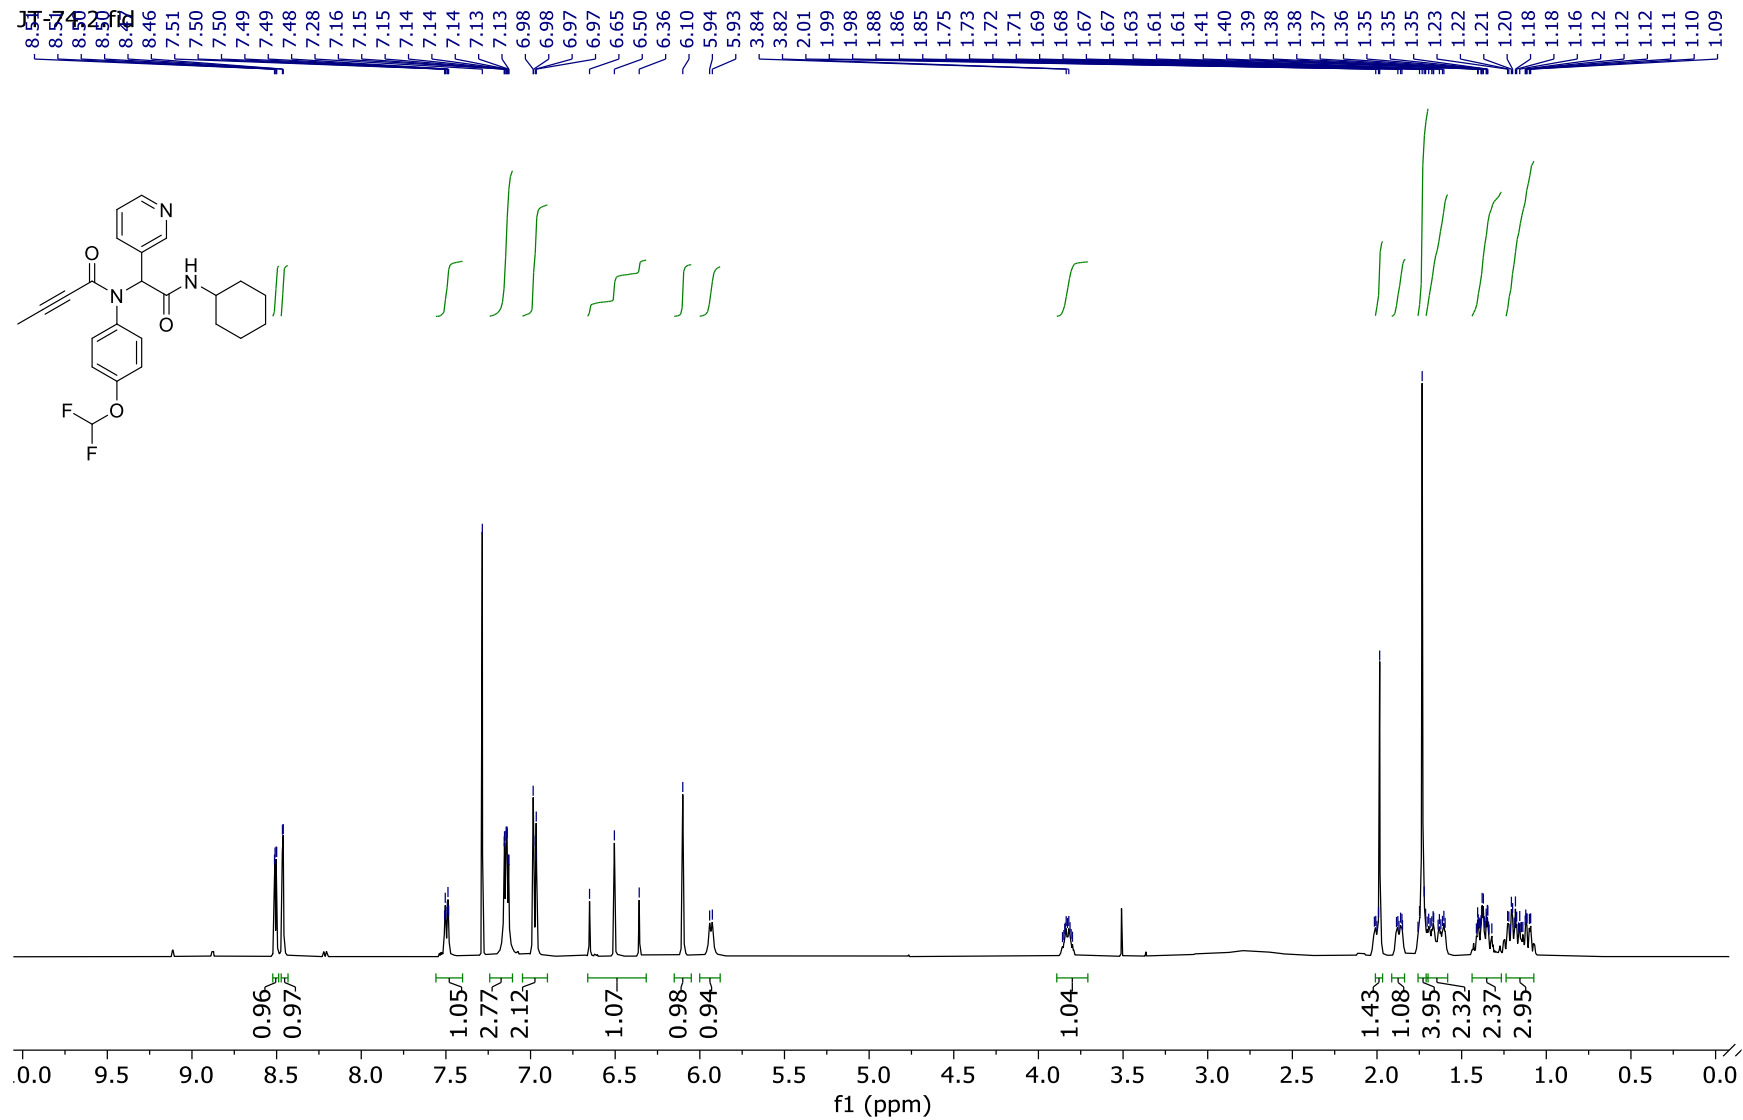

78. Compound **13p** <sup>13</sup>C NMR

JT-74.4.fid

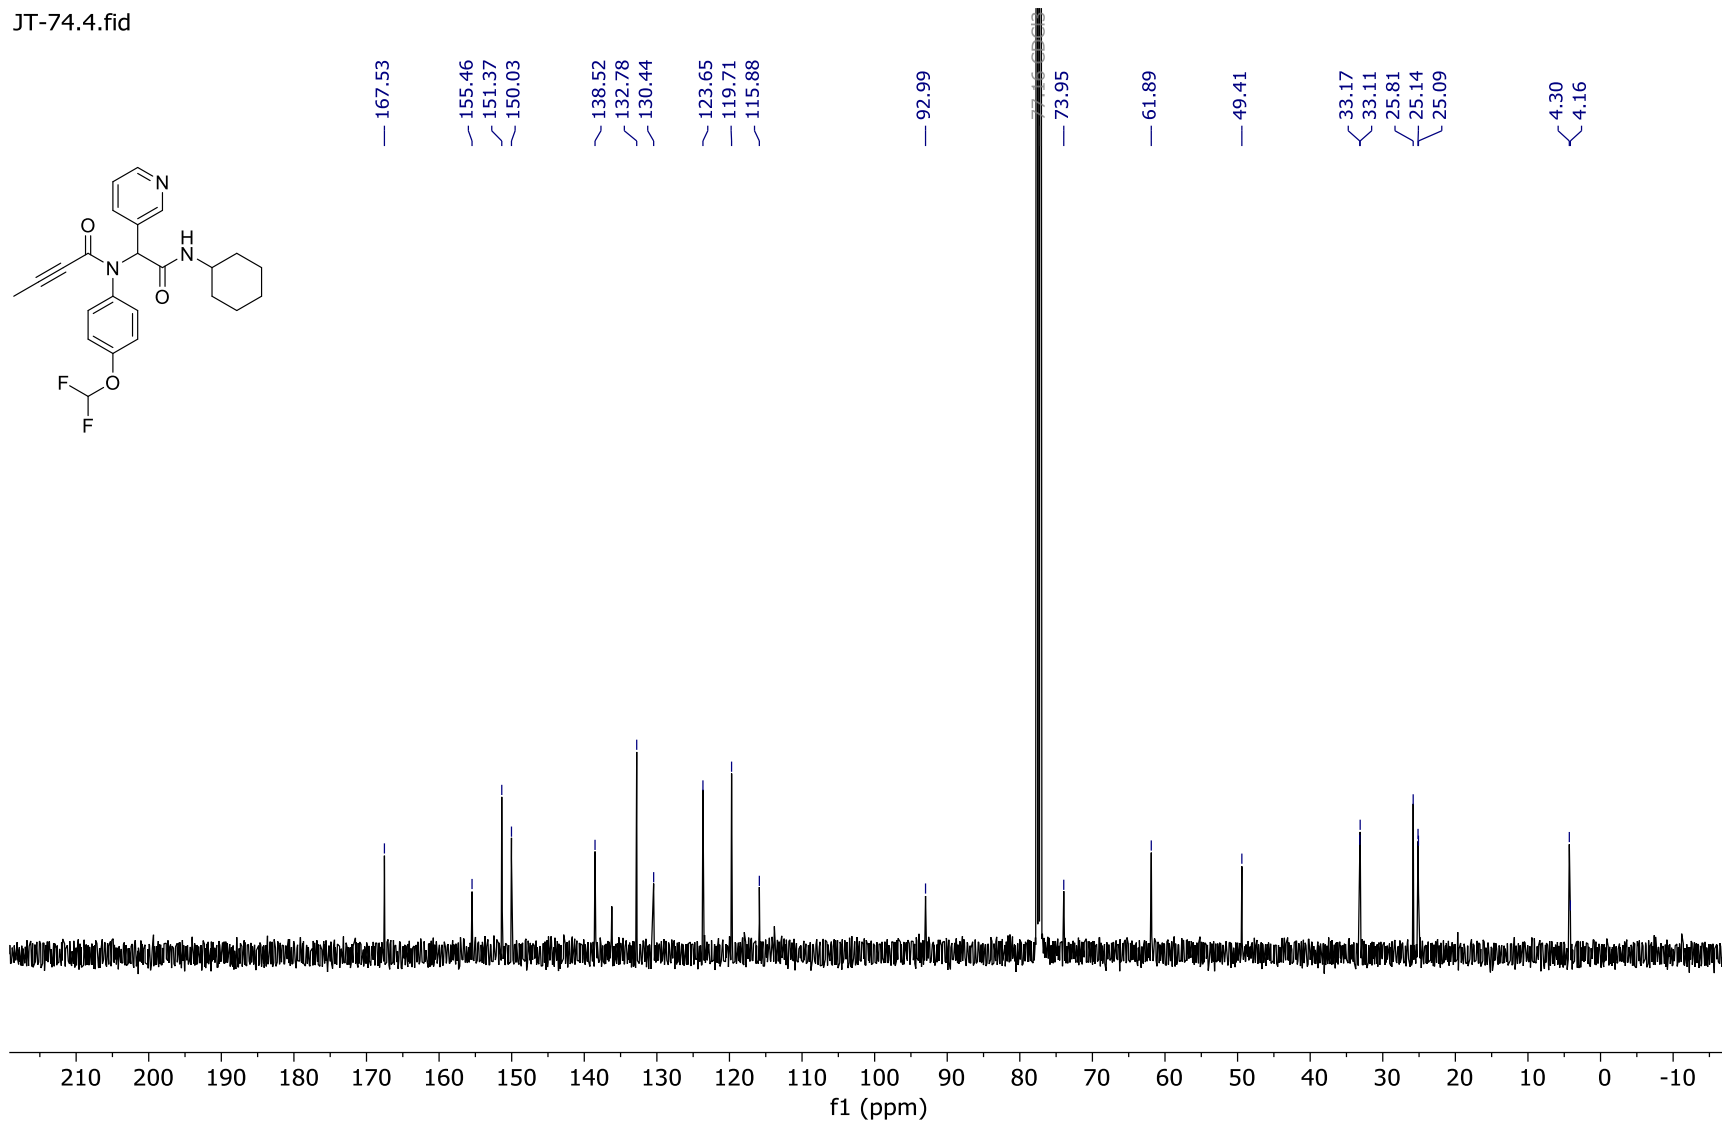

79. Compound **13q** <sup>13</sup>C NMR

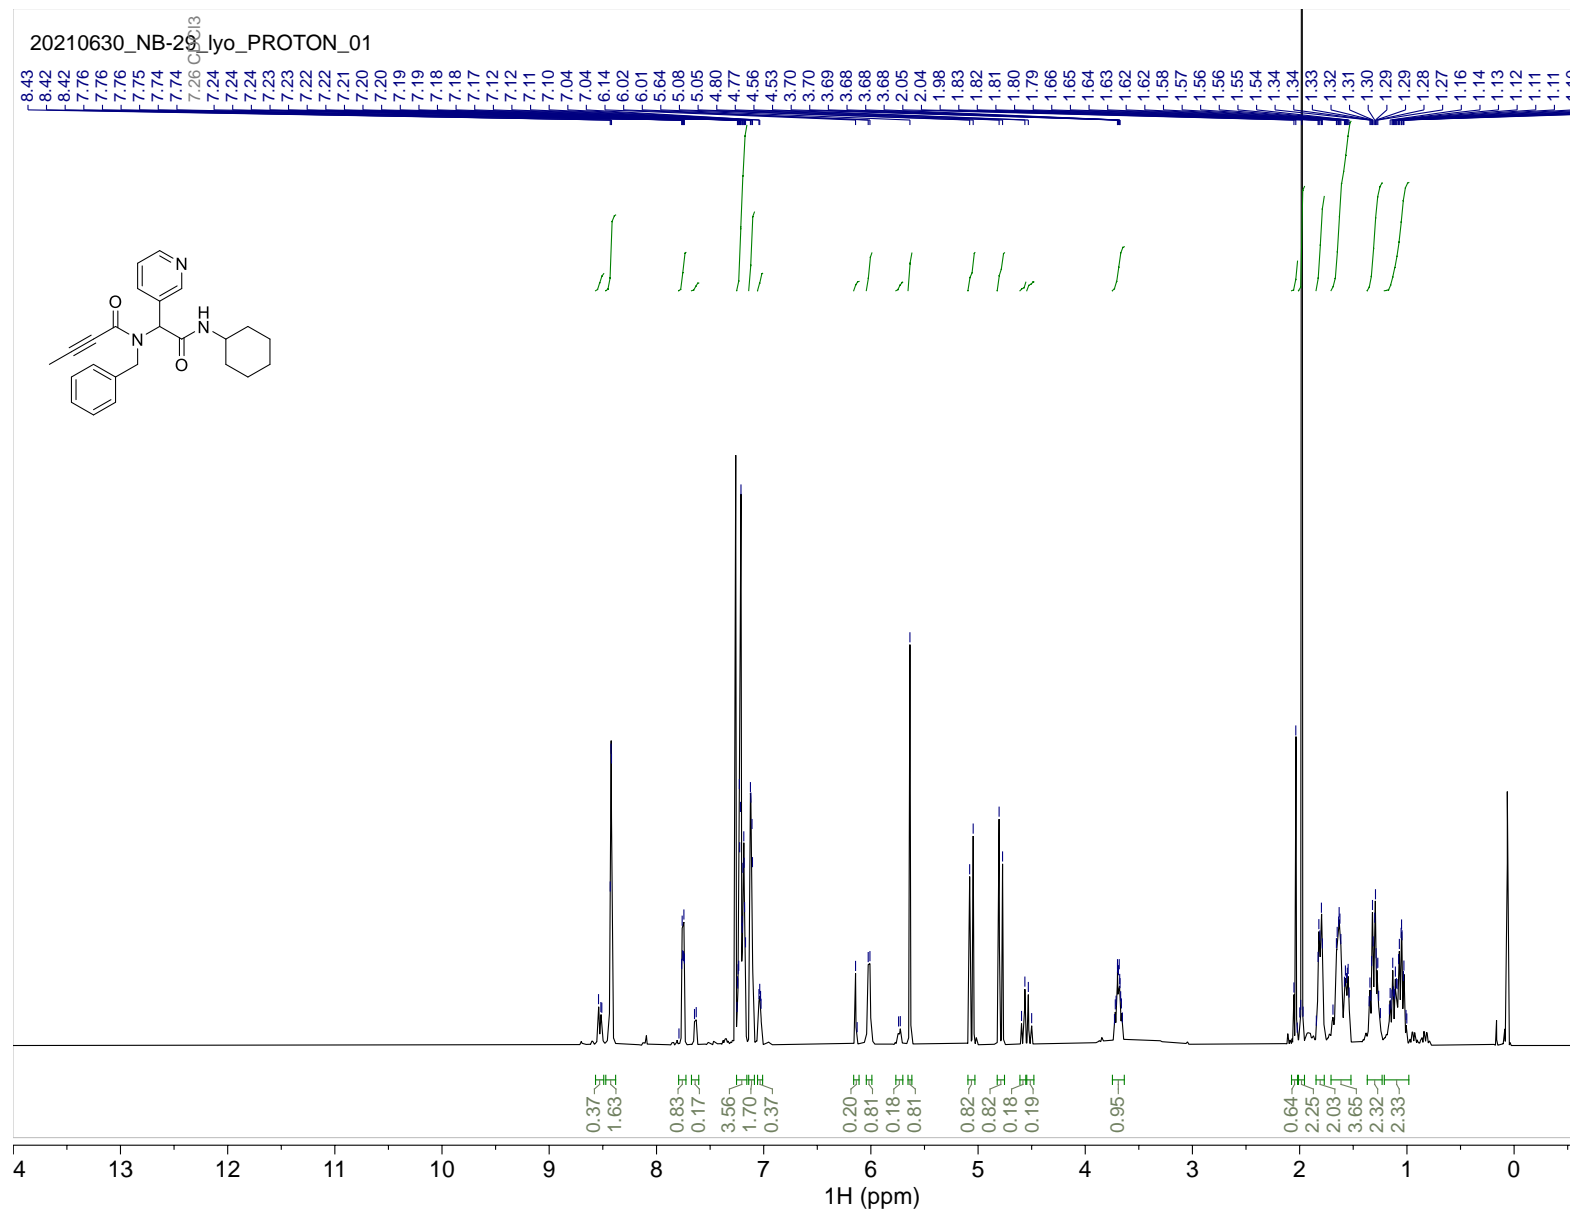

80. Compound **13q** <sup>13</sup>C NMR

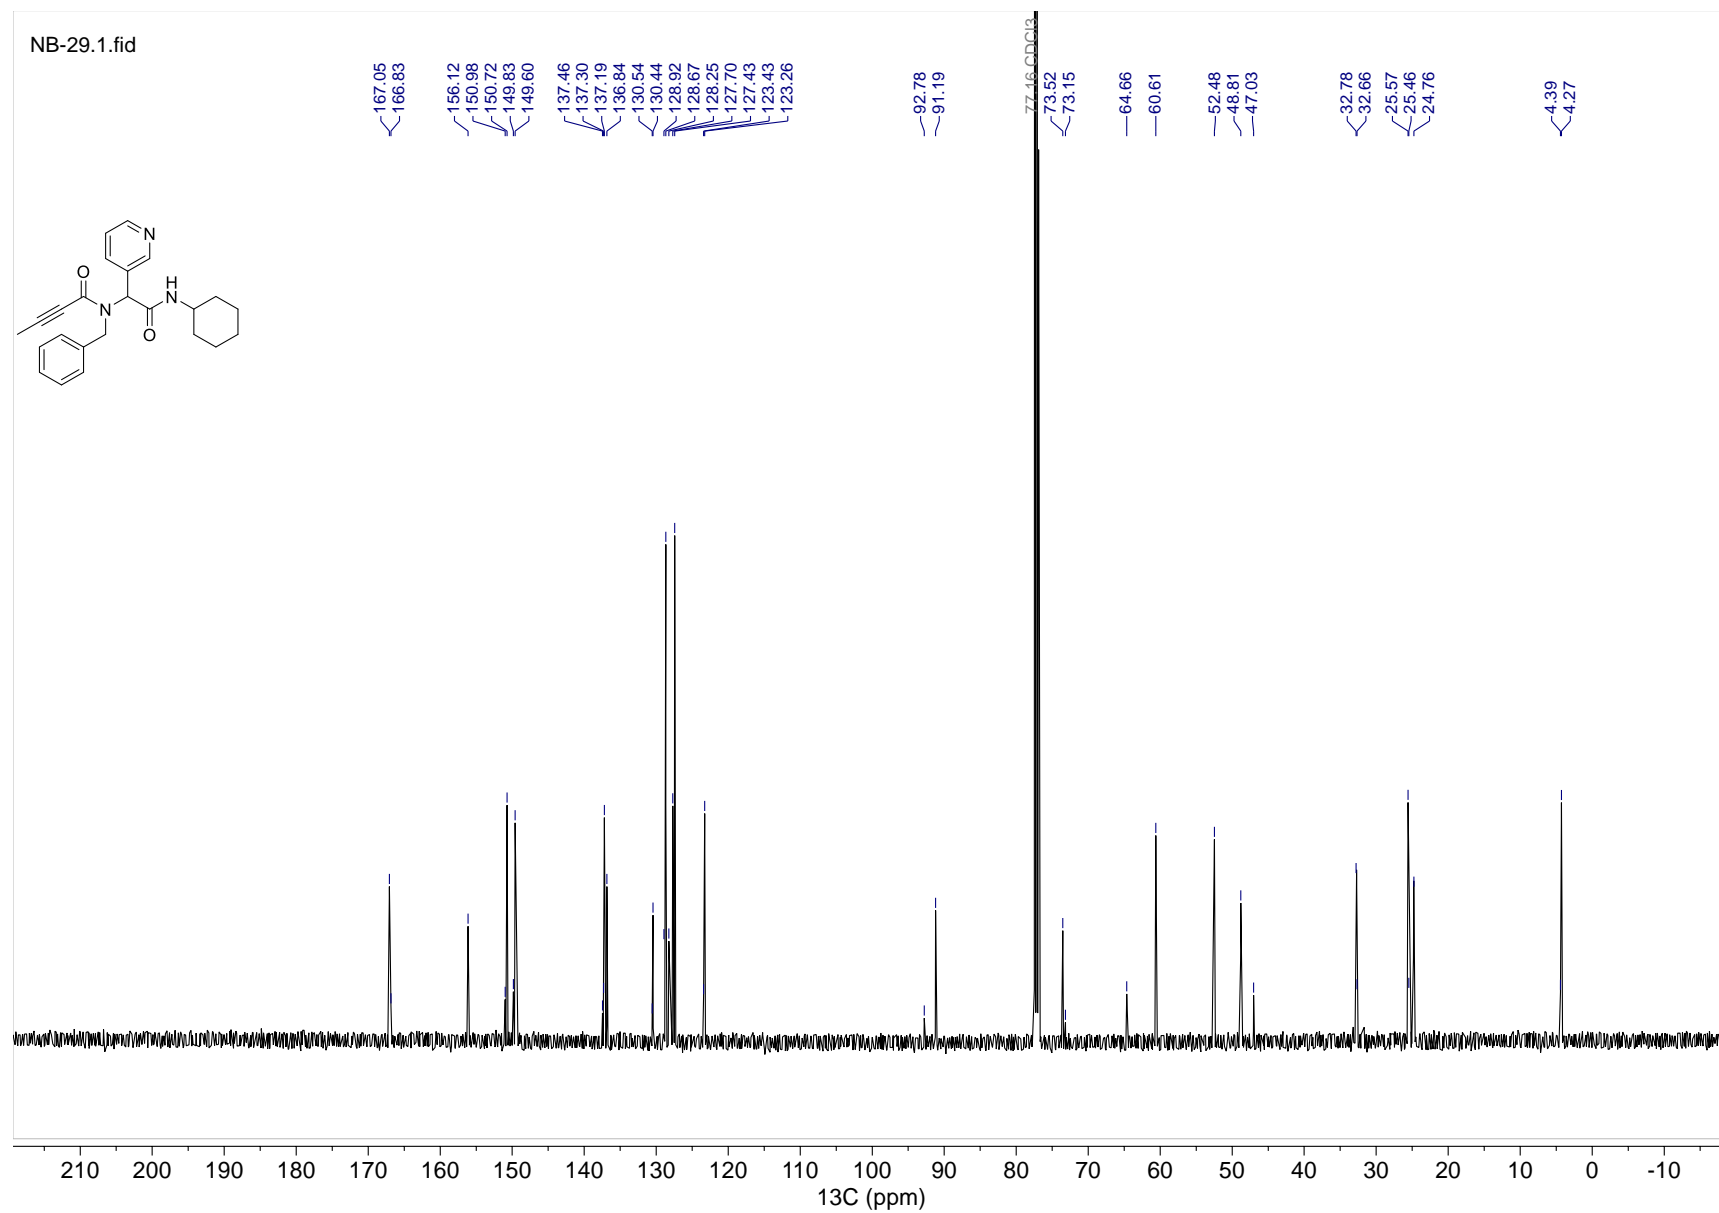

81. Compound **14a** <sup>1</sup>H NMR

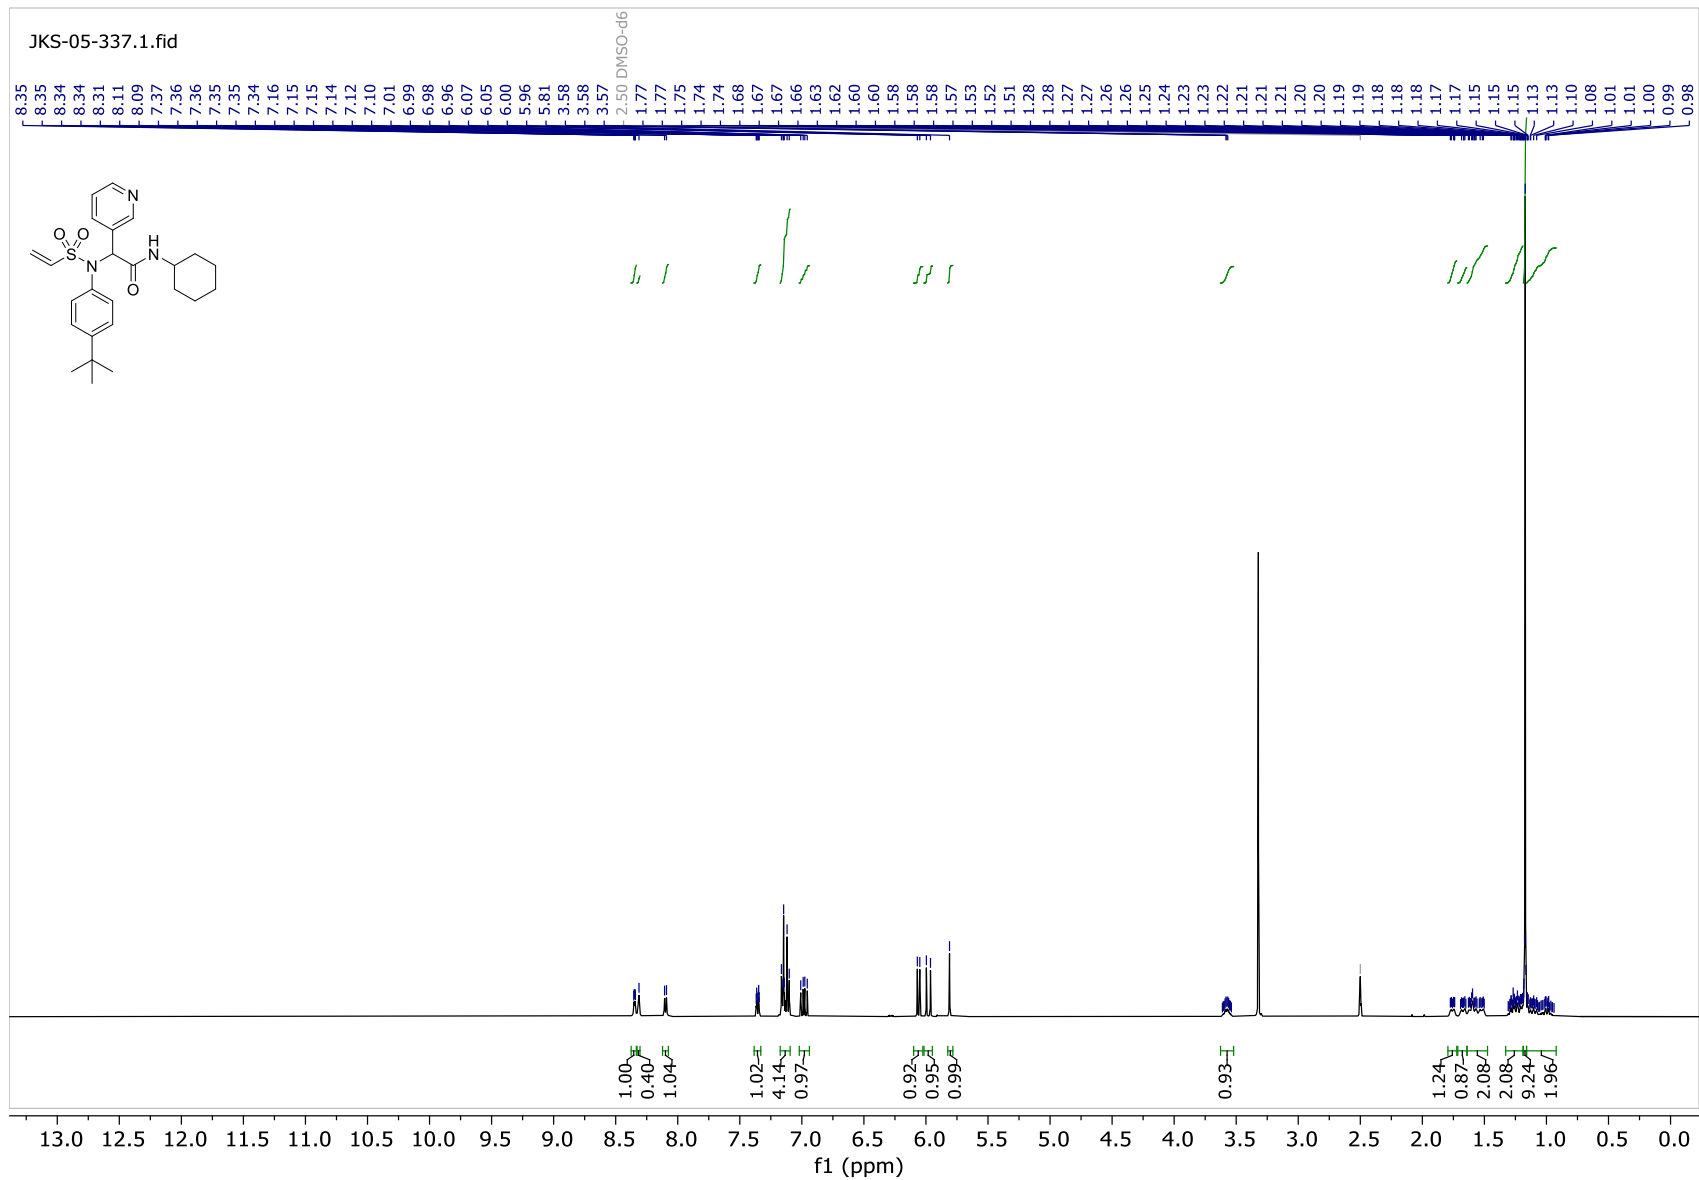

82. Compound **14a** <sup>13</sup>C NMR

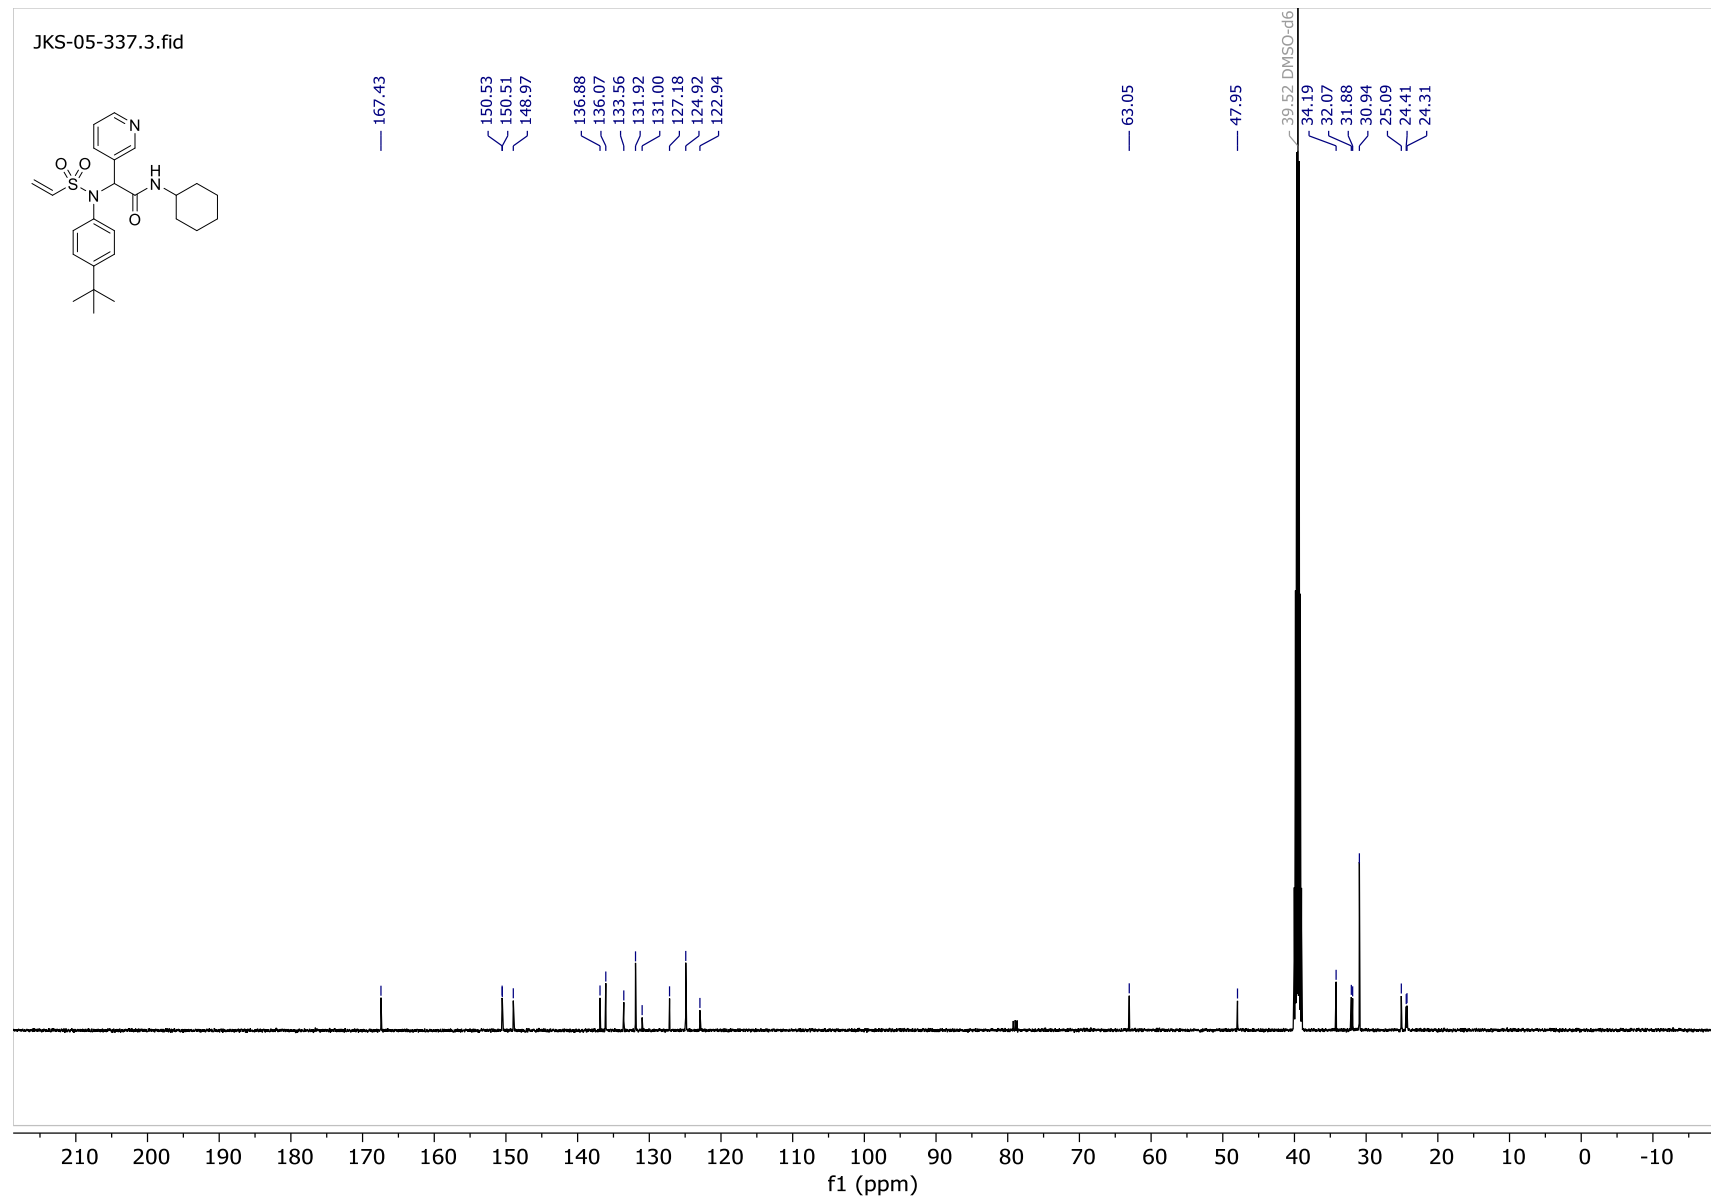

83. Compound **14b** <sup>1</sup>H NMR

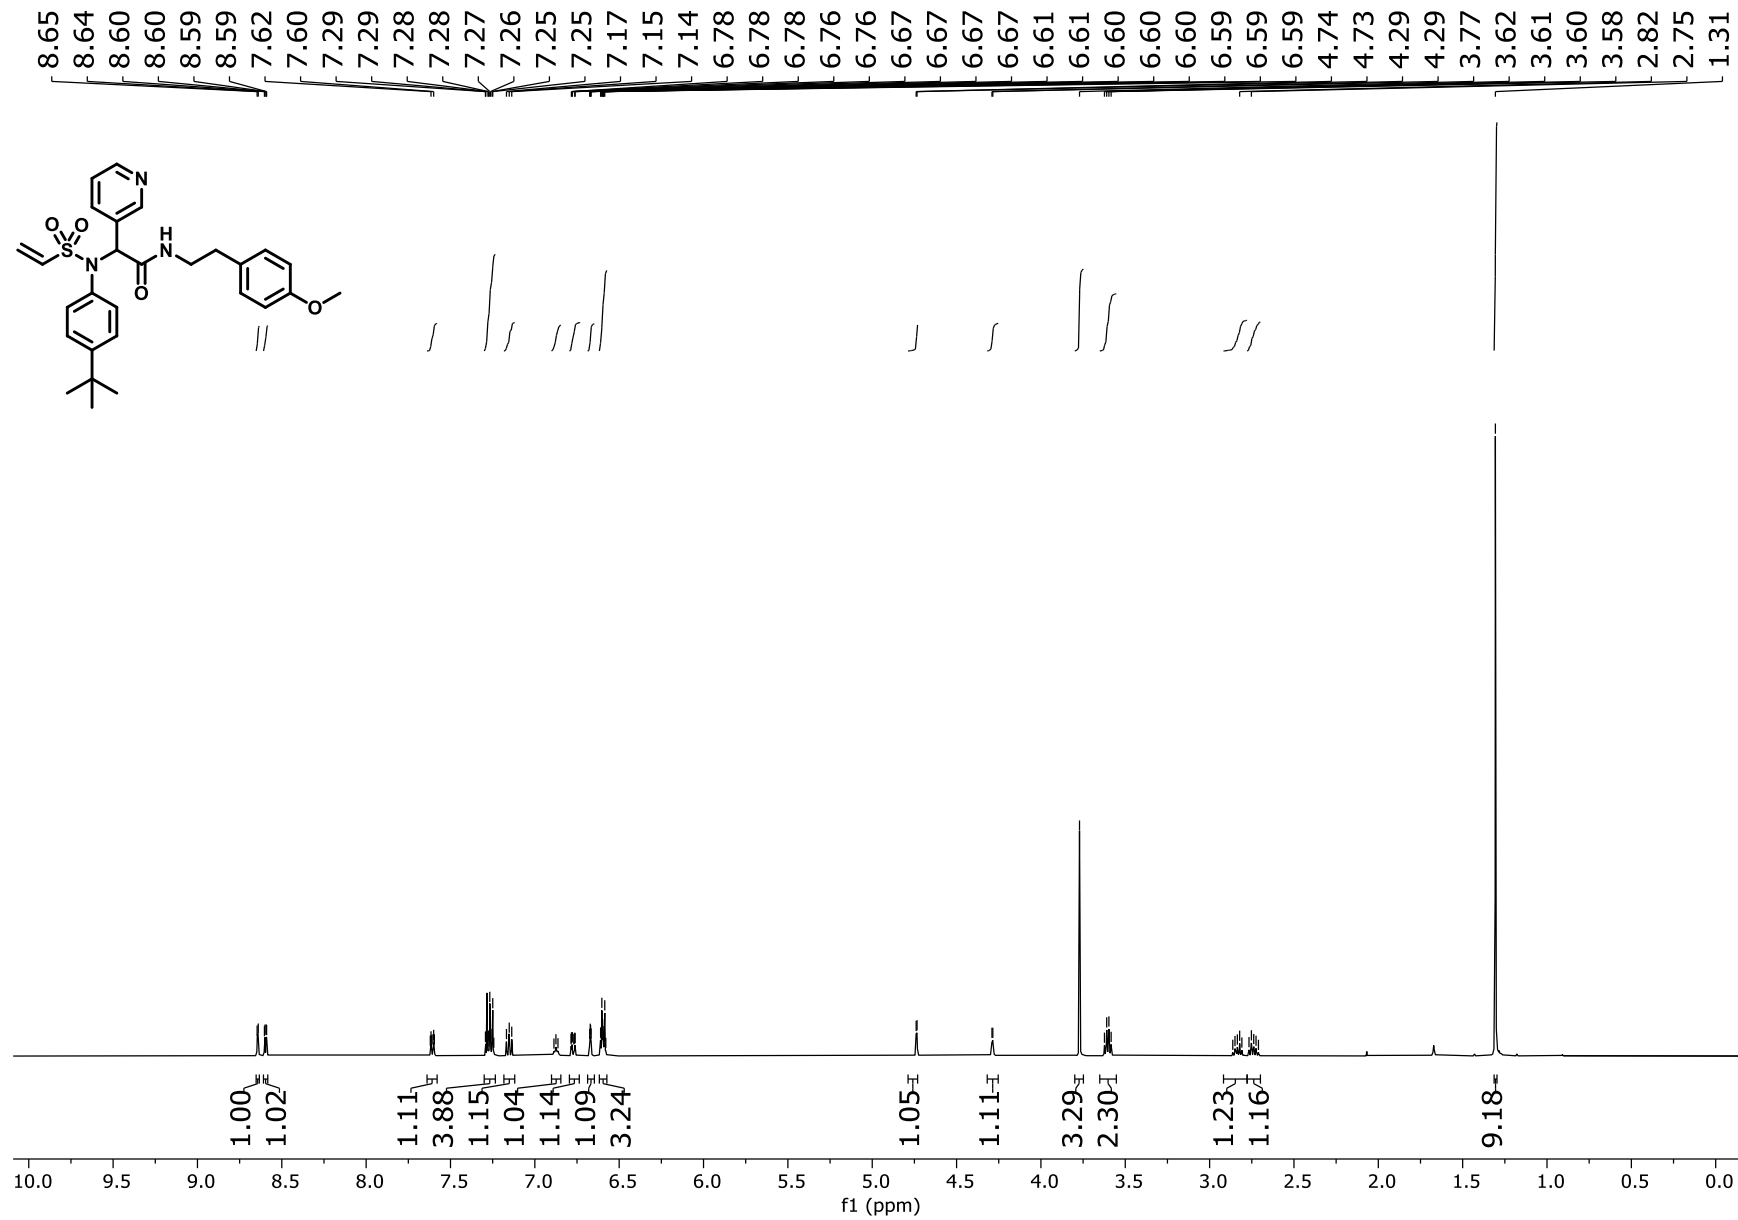

84. Compound **14b** <sup>13</sup>C NMR

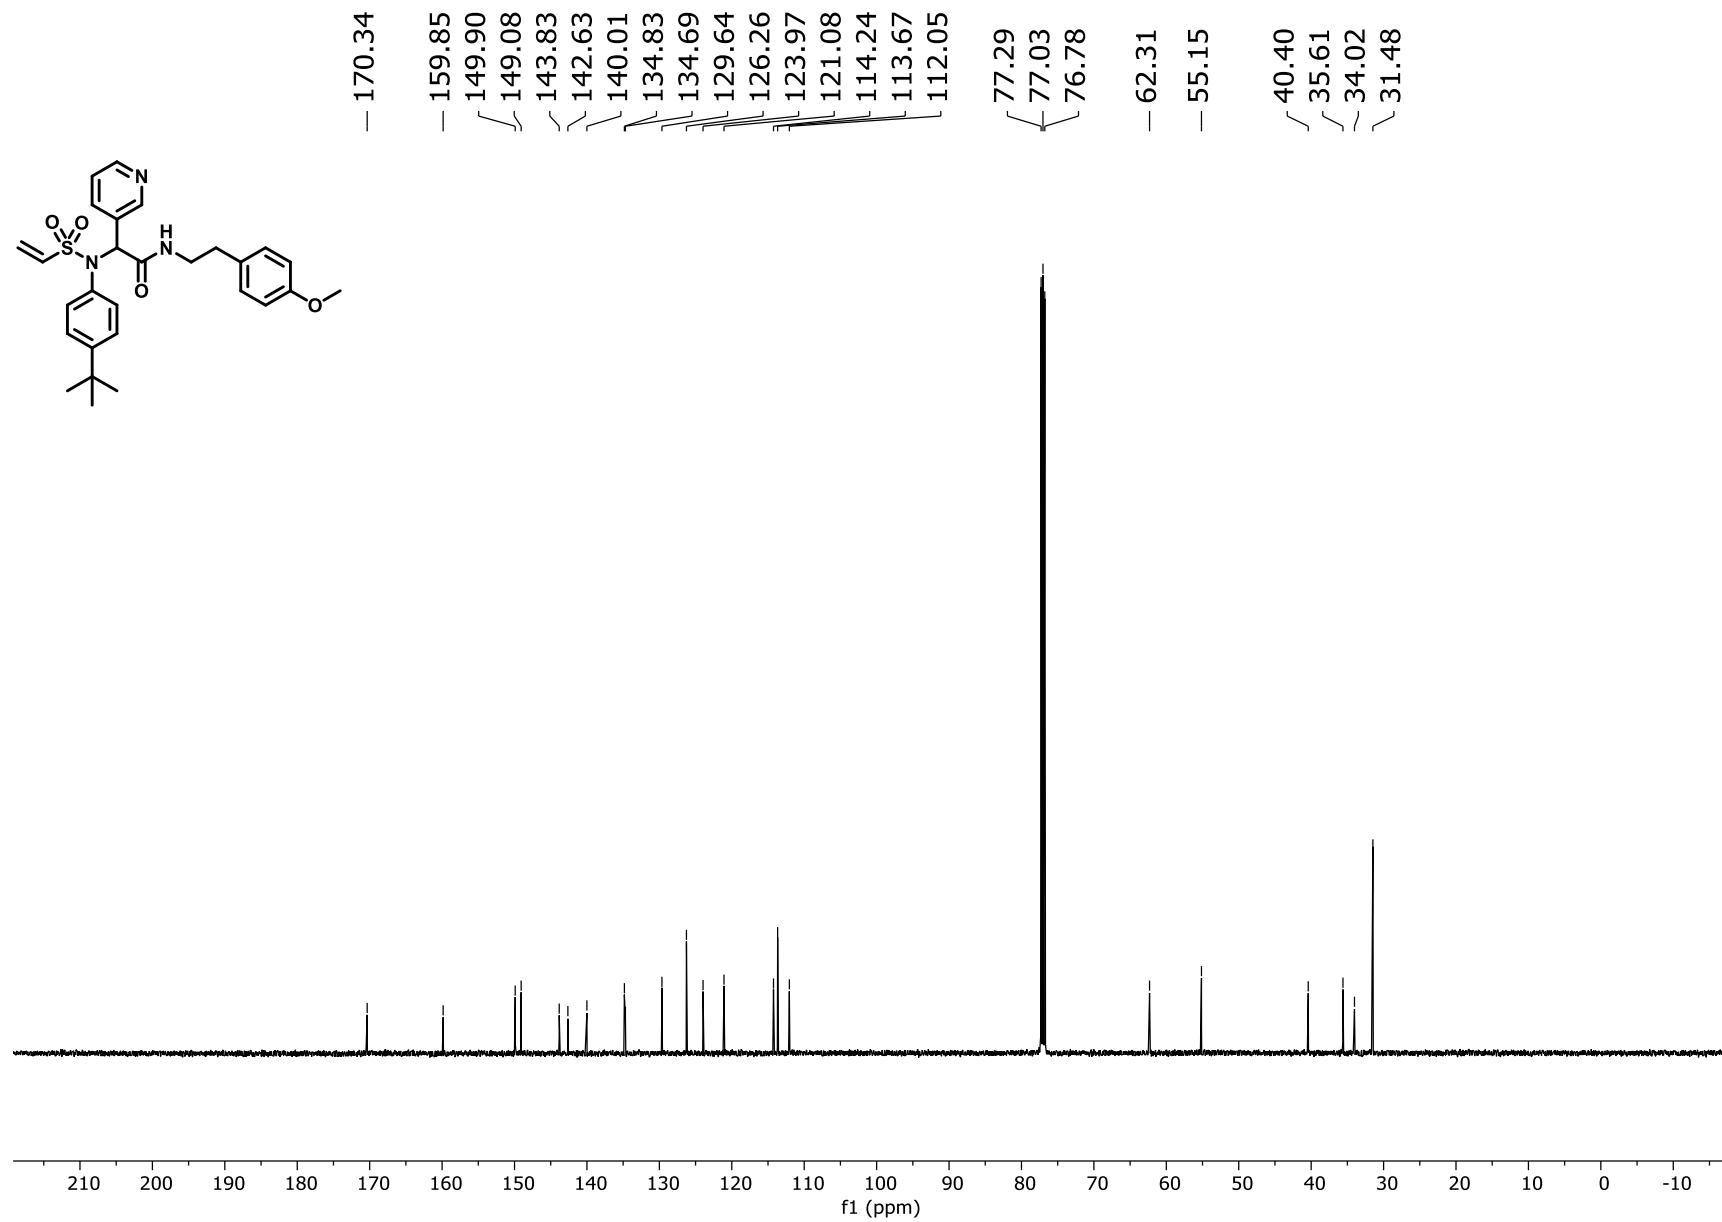



85. Compound **14c** <sup>1</sup>H NMR

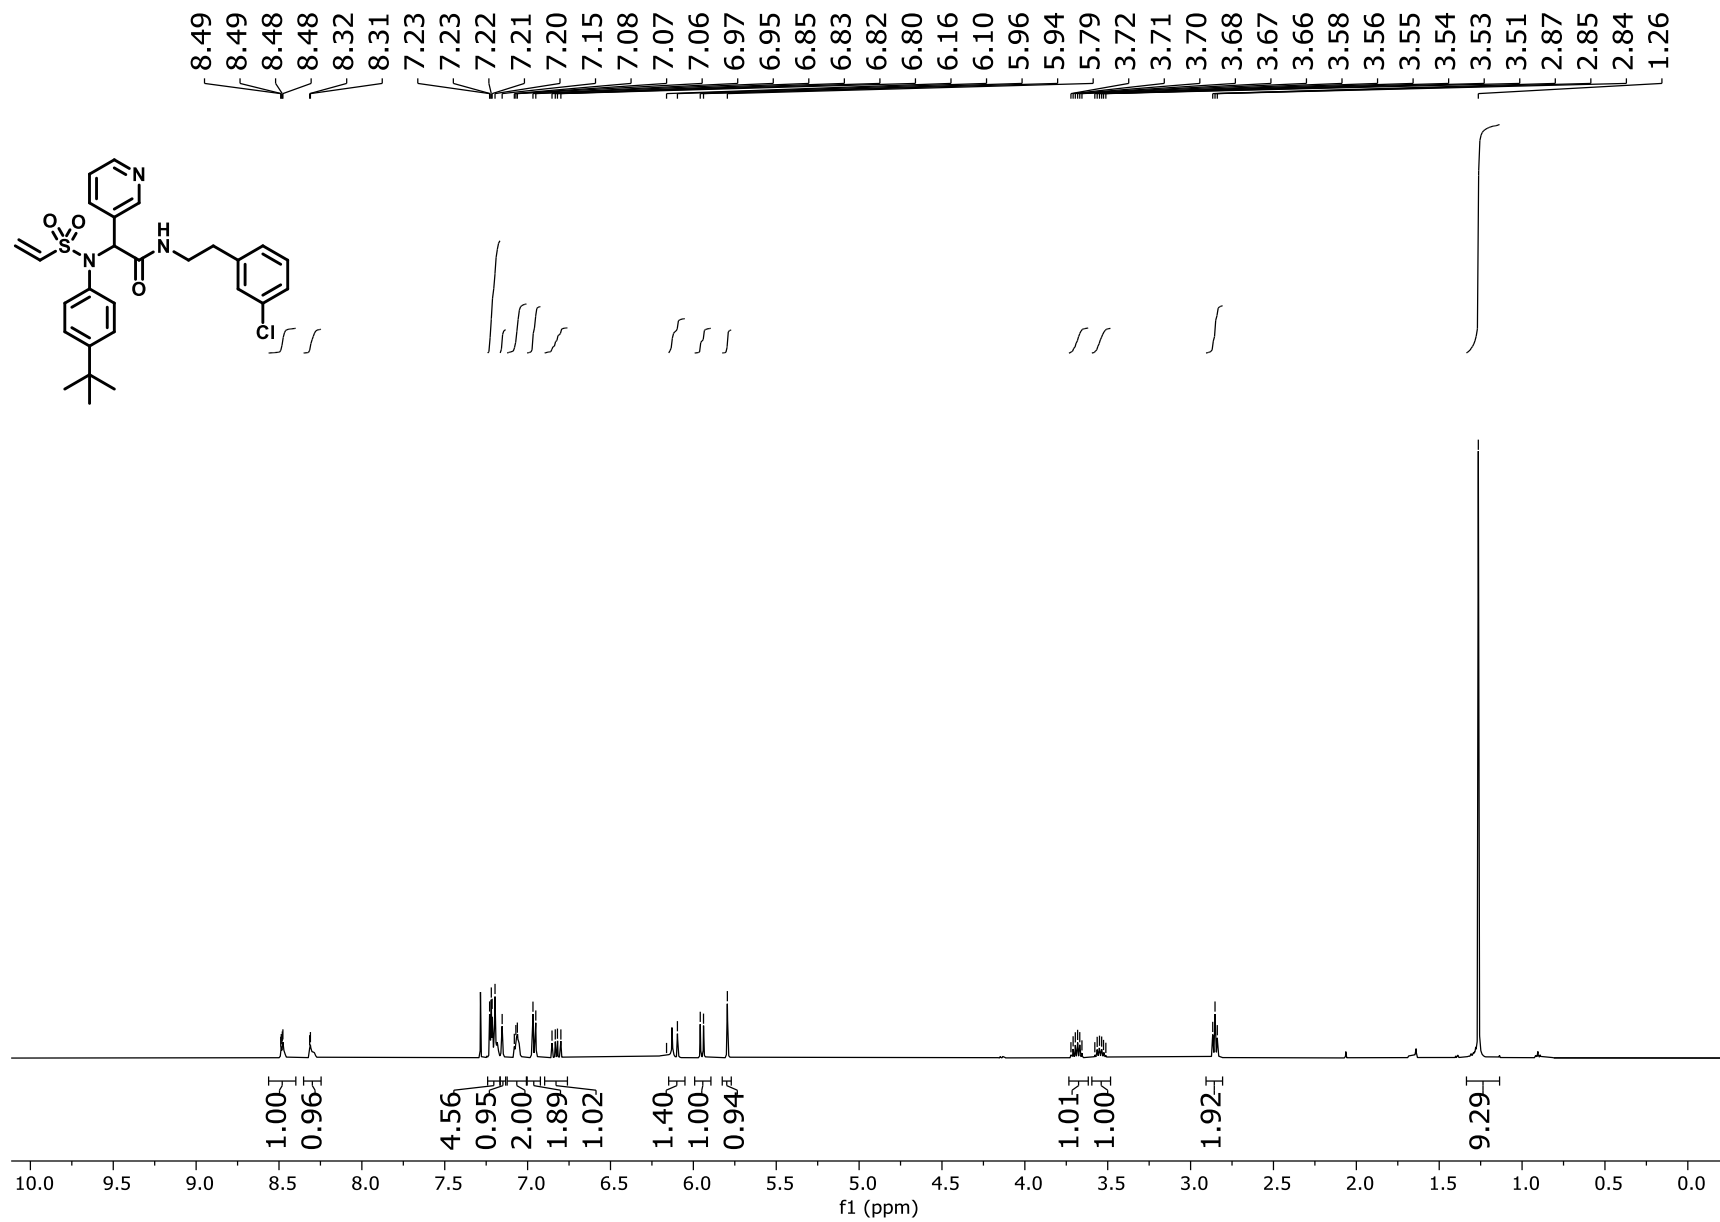

86. Compound **14c** <sup>13</sup>C NMR

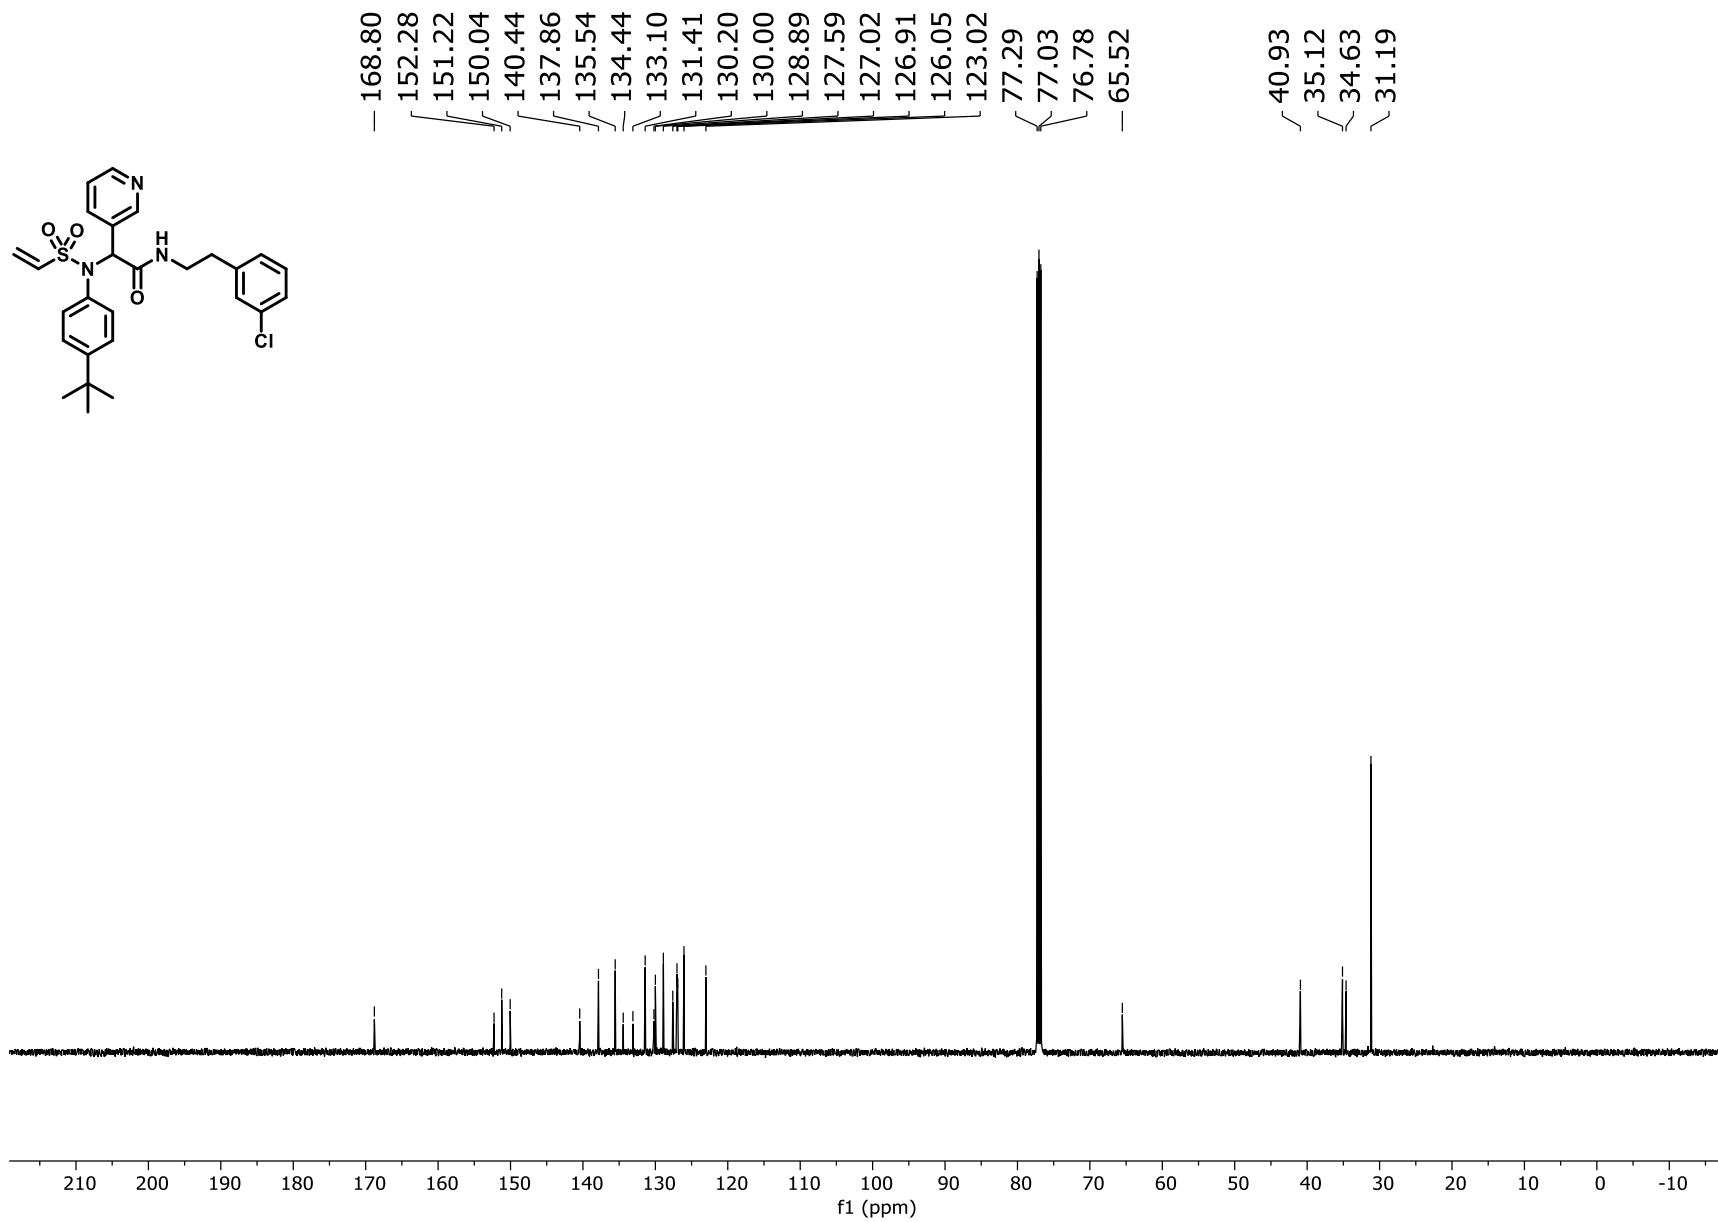

87. Compound **14d** <sup>1</sup>H NMR

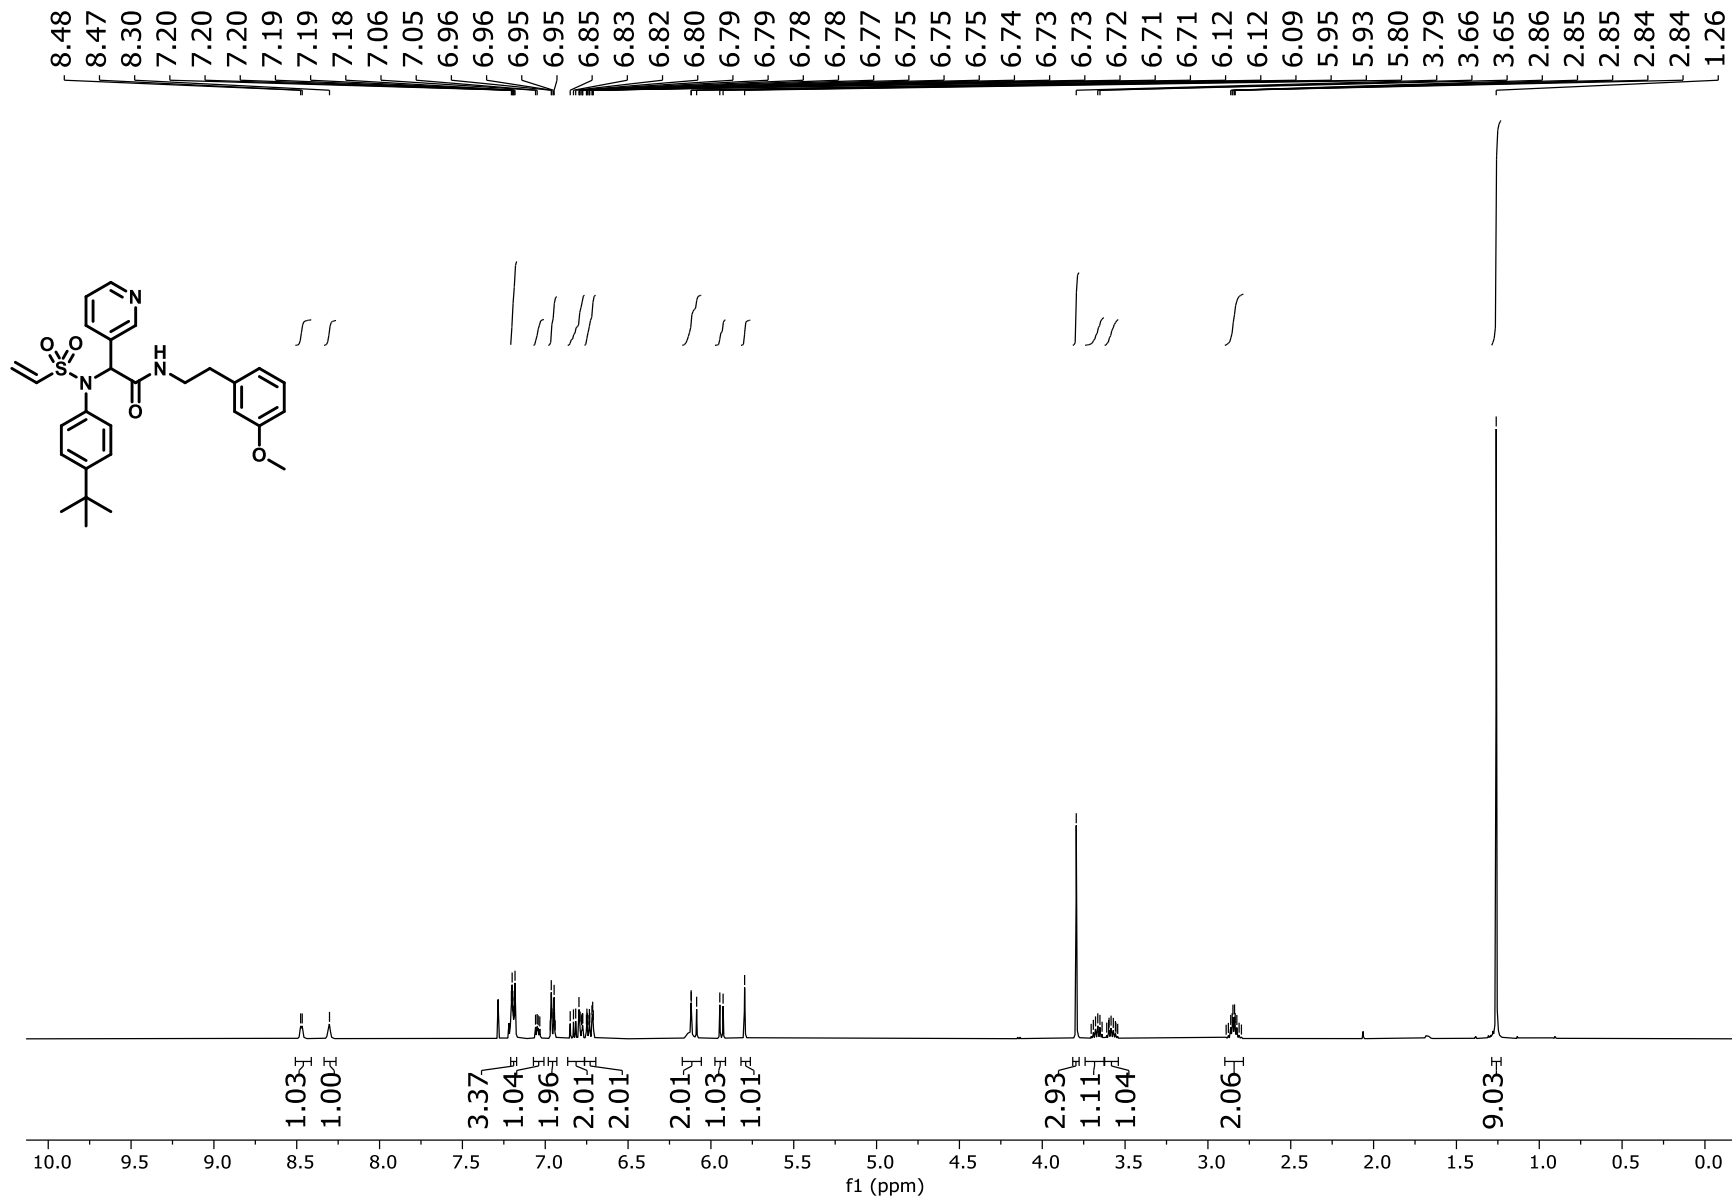

88. Compound **14d** <sup>13</sup>C NMR

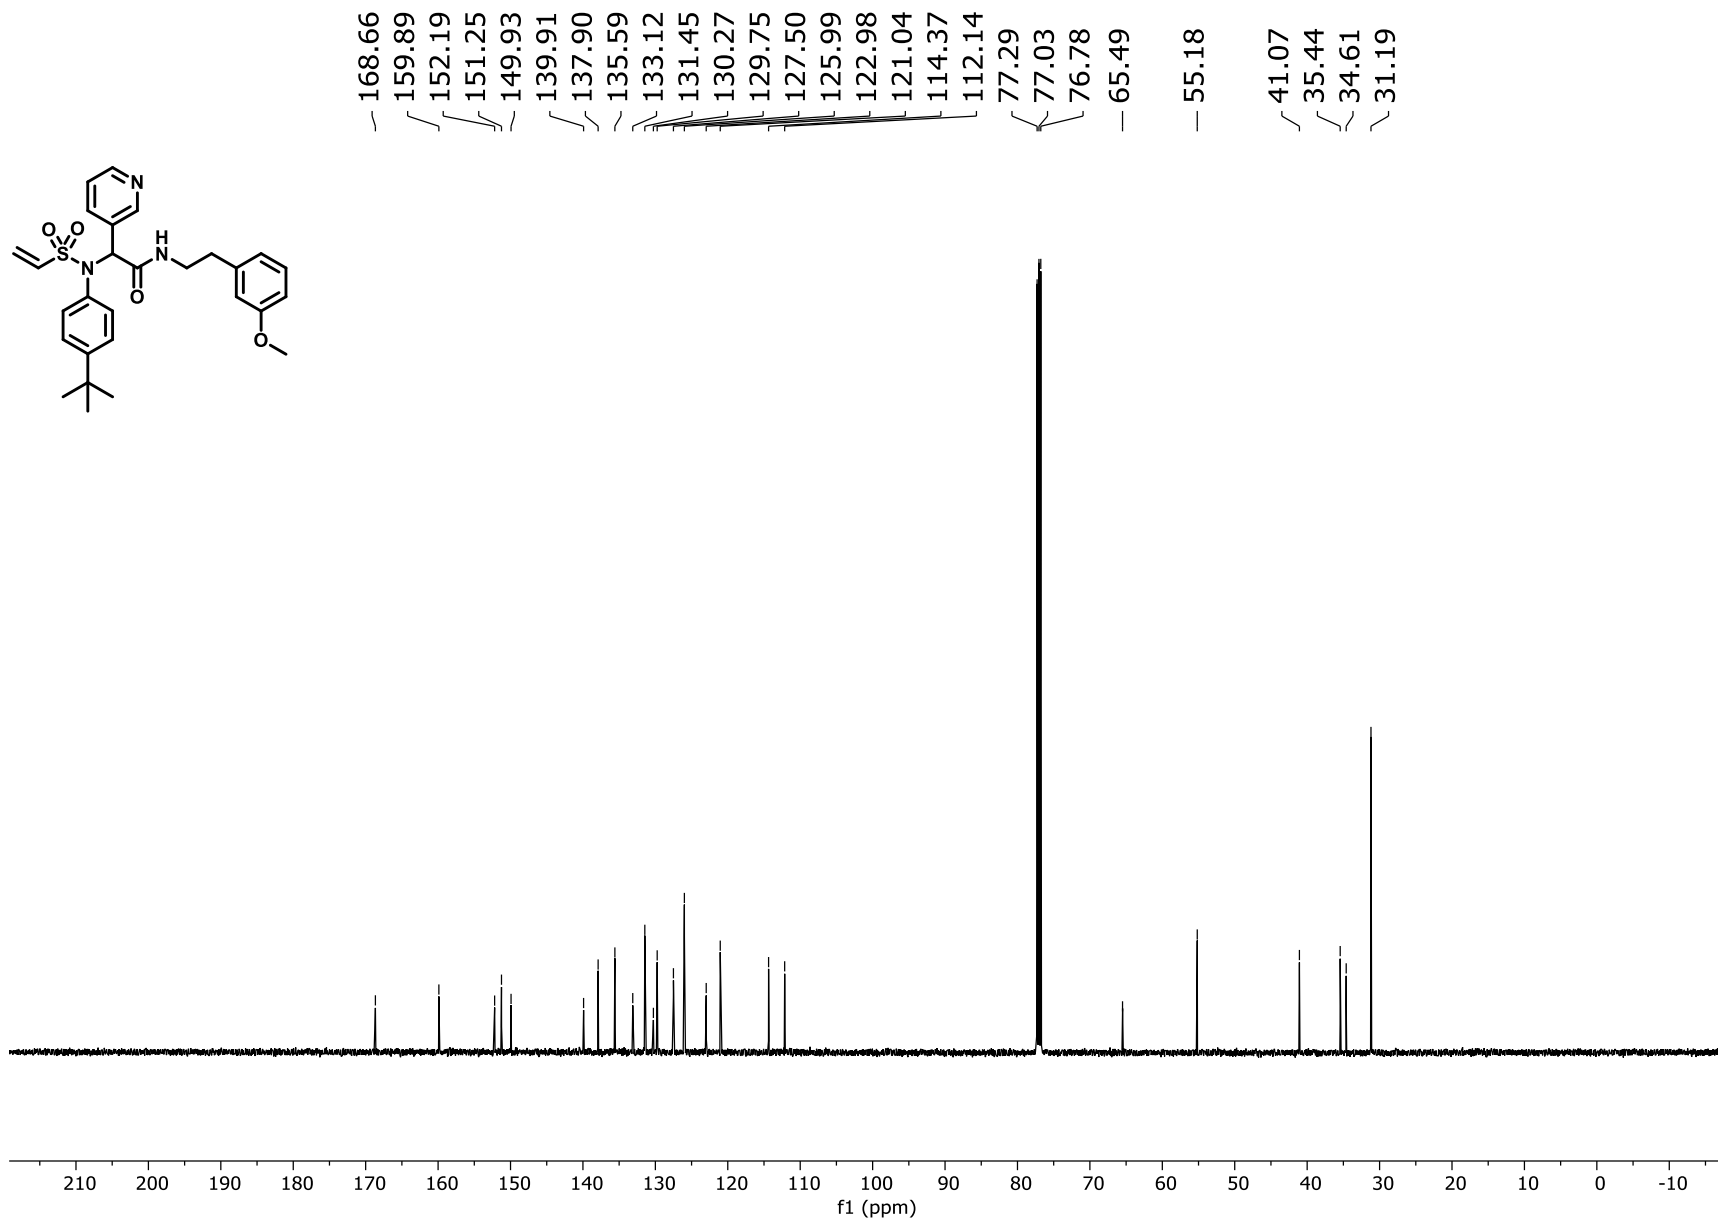

89. Compound **14e** <sup>1</sup>H NMR

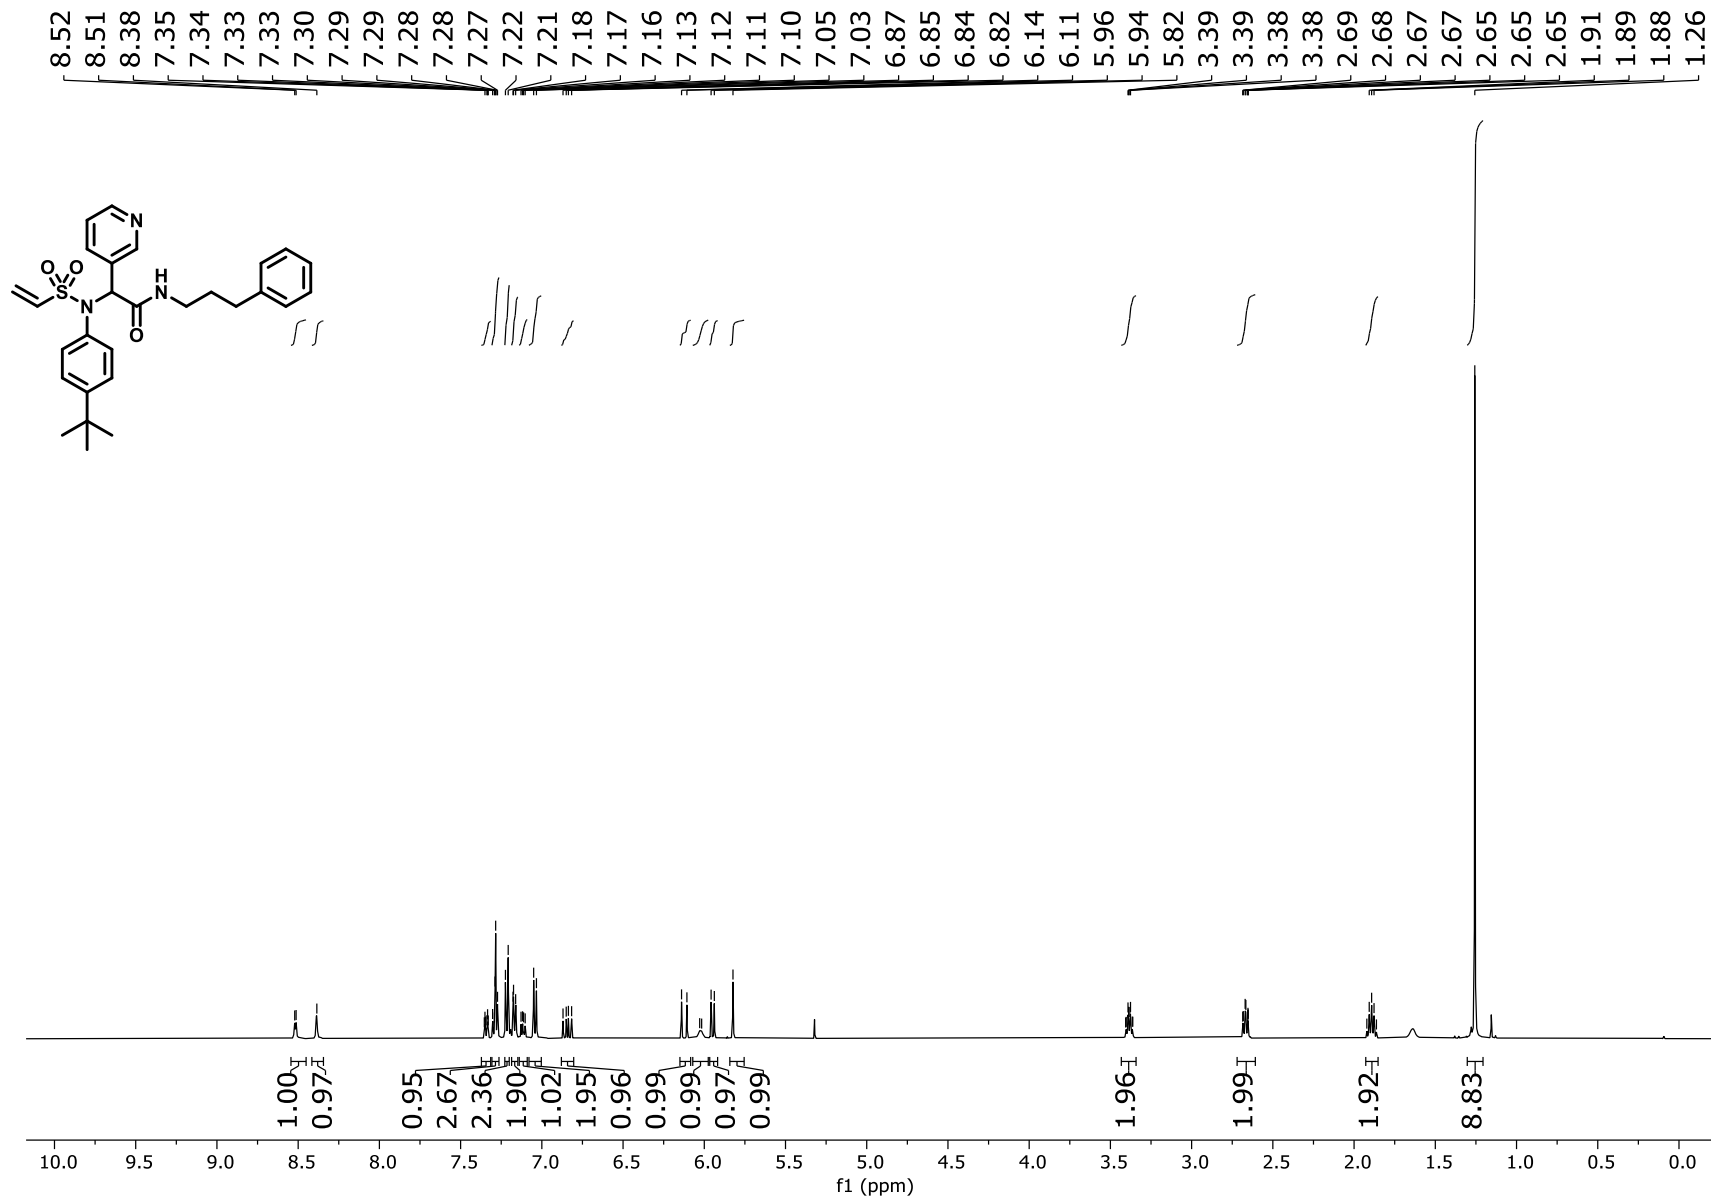

90. Compound **14e** <sup>13</sup>C NMR

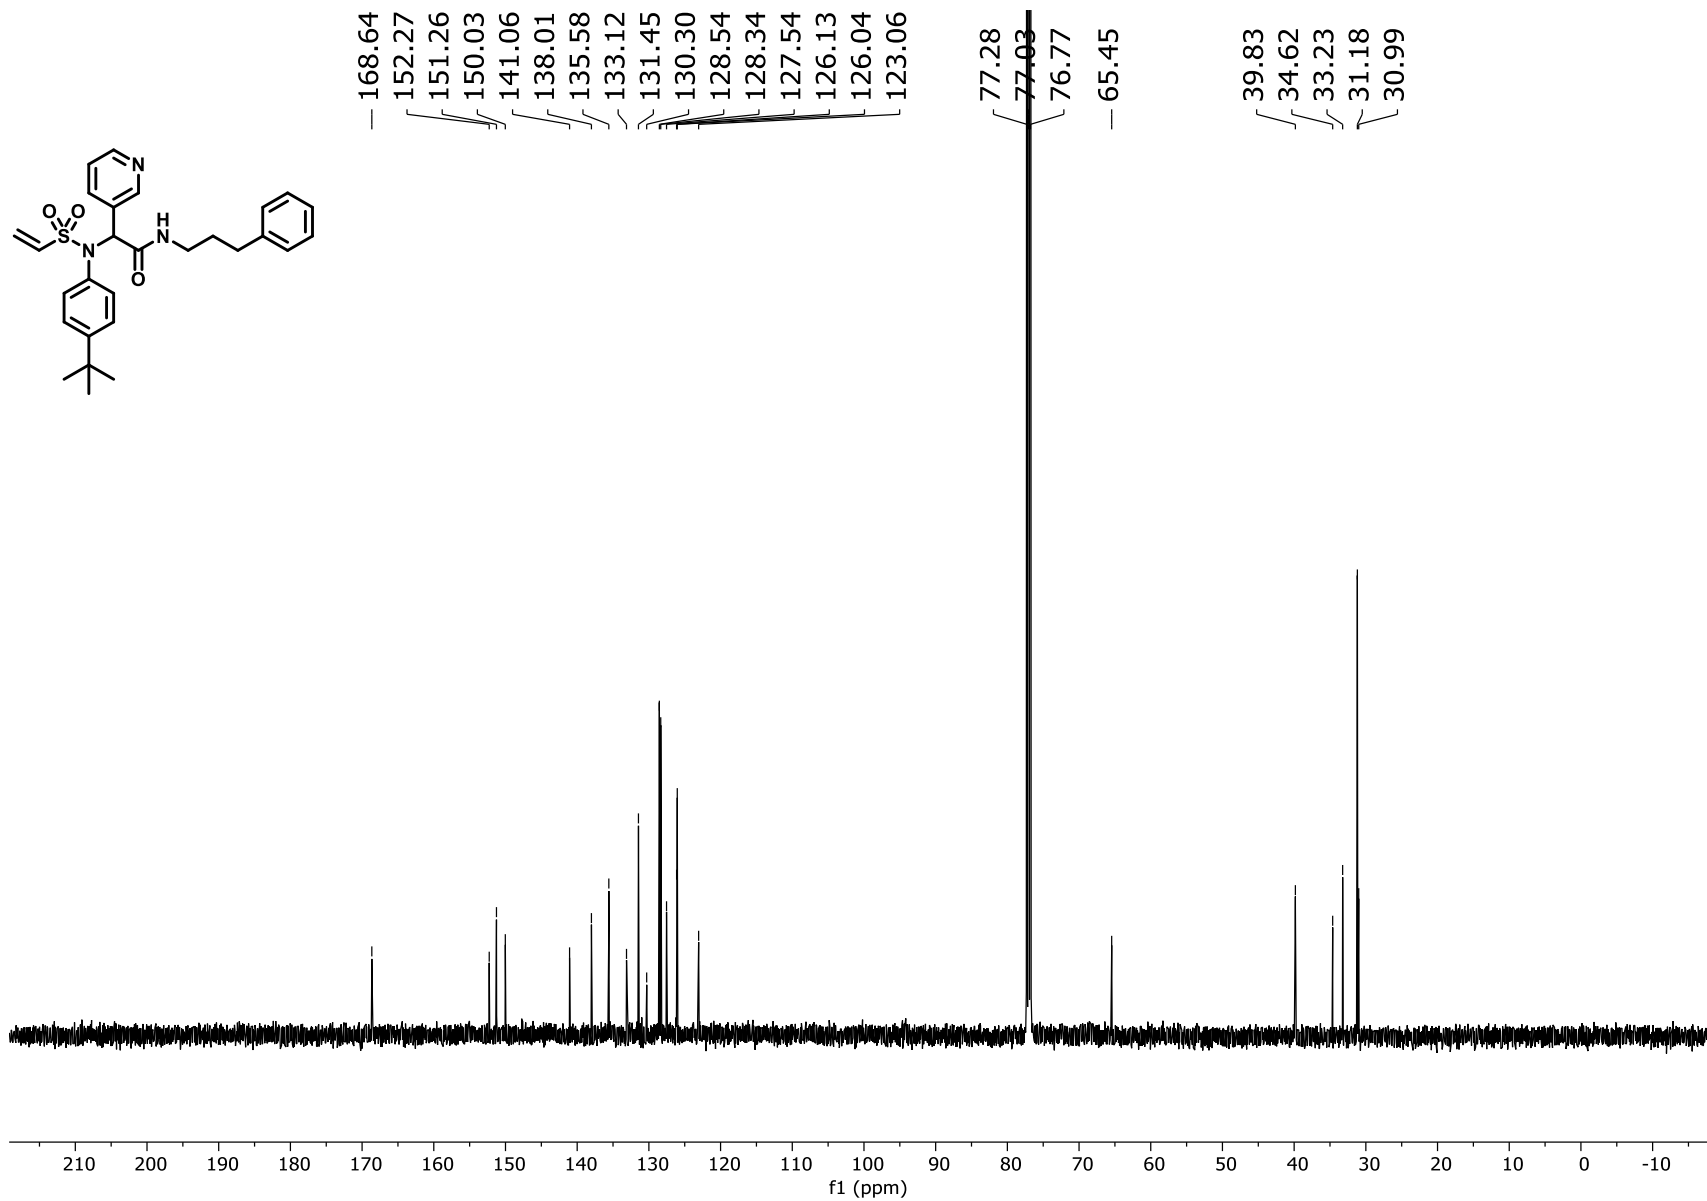

91. Compound **14f** <sup>1</sup>H NMR

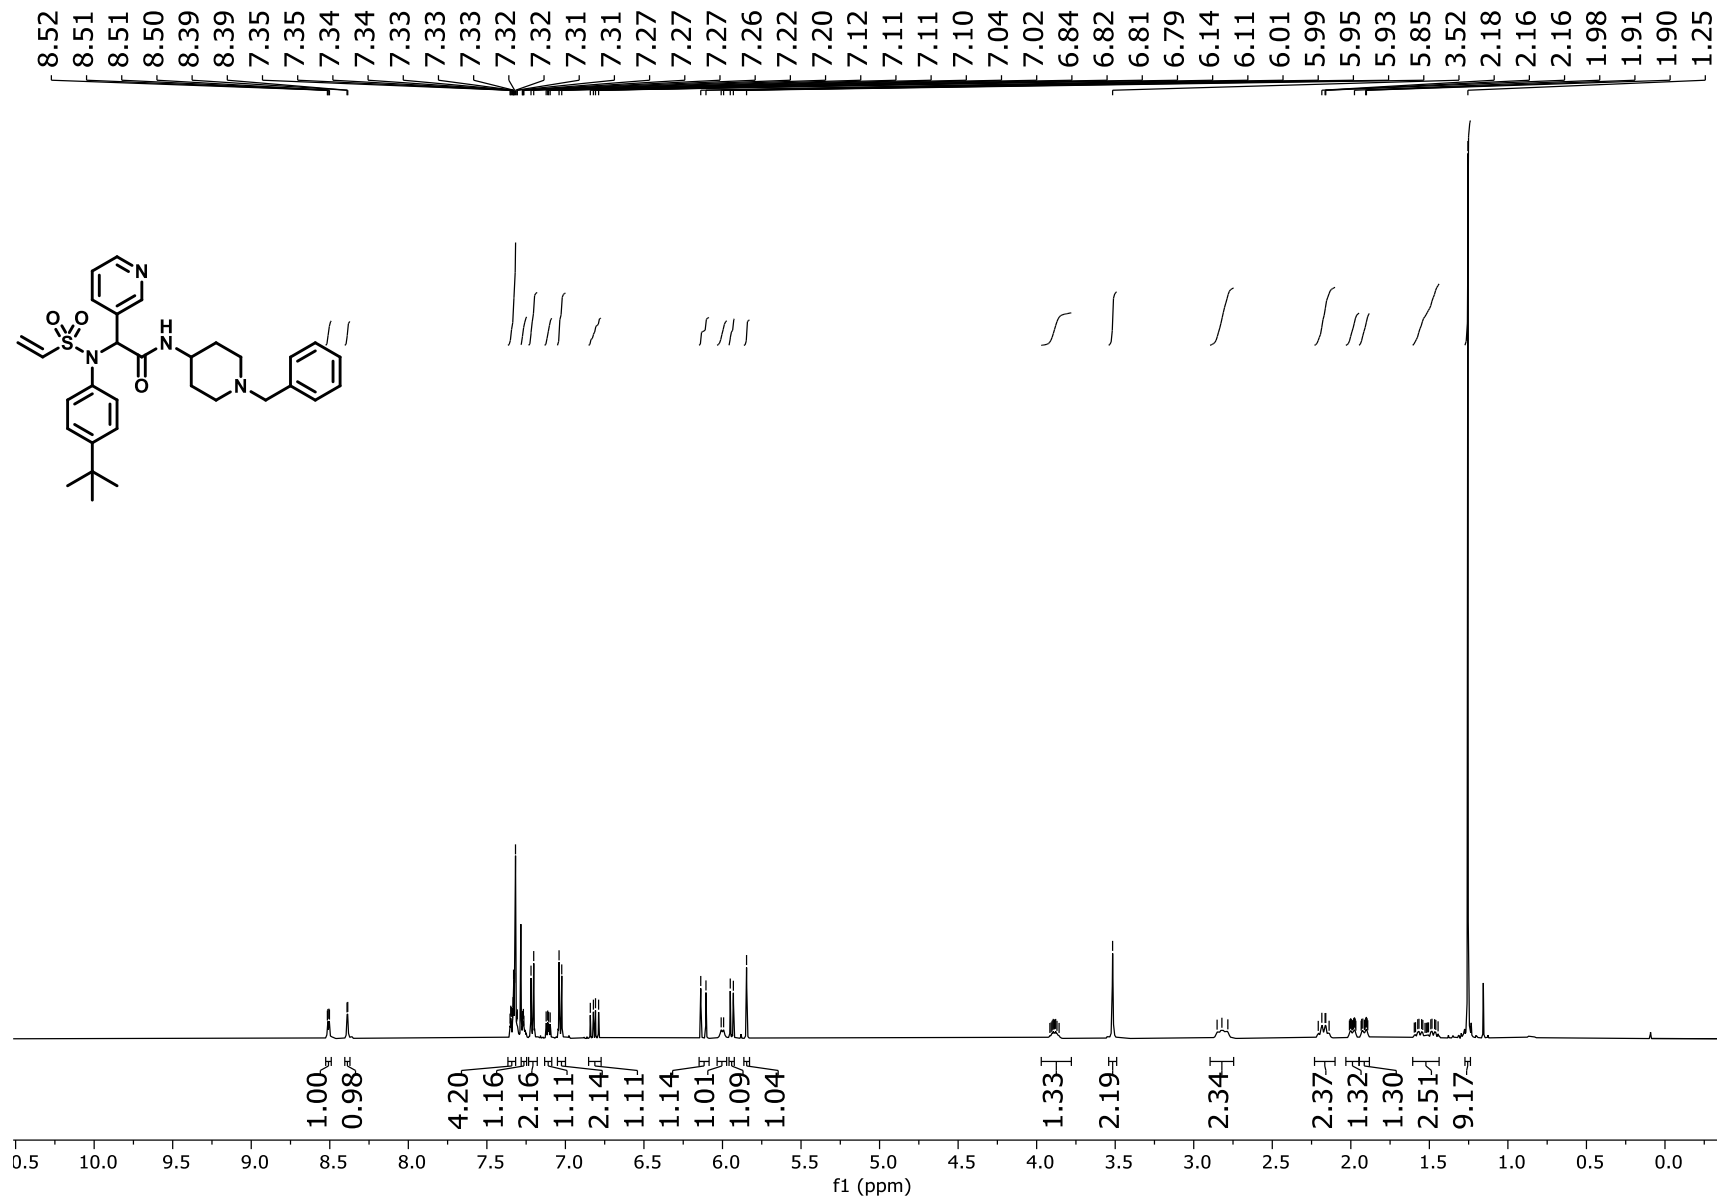

92. Compound **14f** <sup>13</sup>C NMR

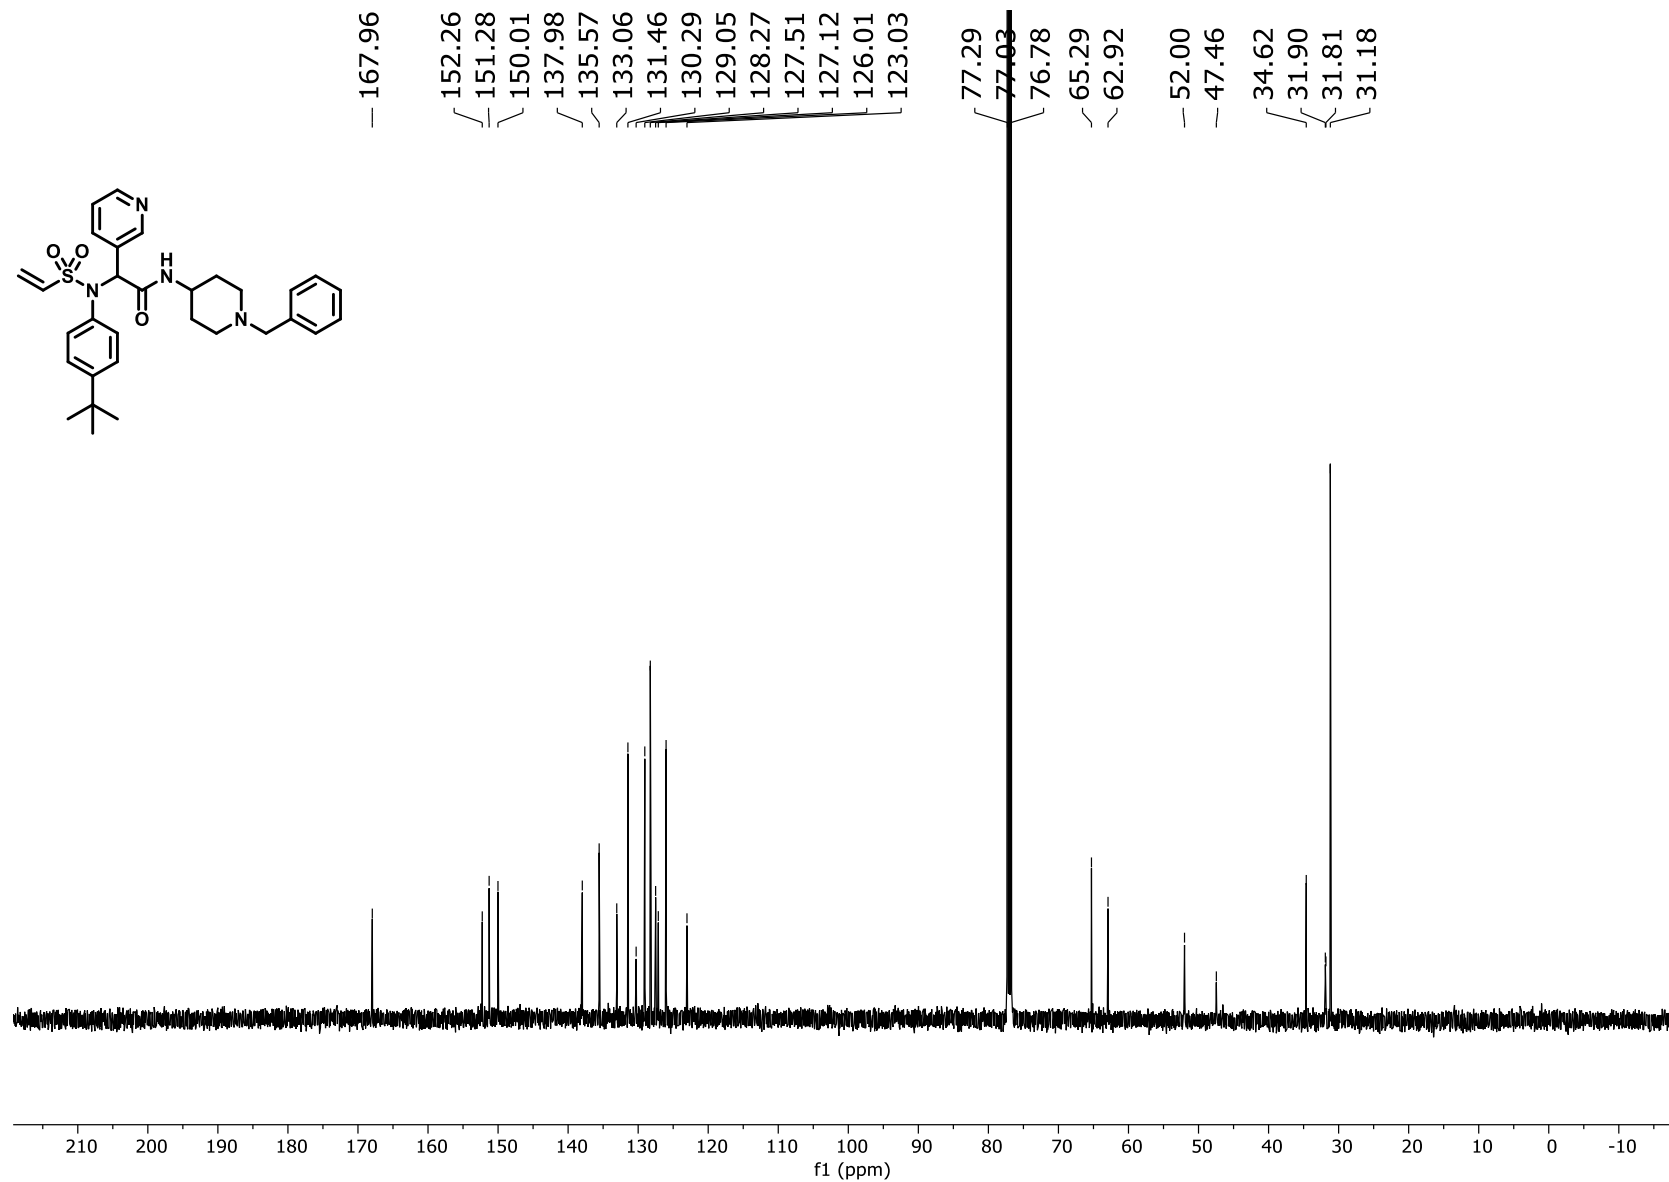



93. Compound **14g** <sup>1</sup>H NMR

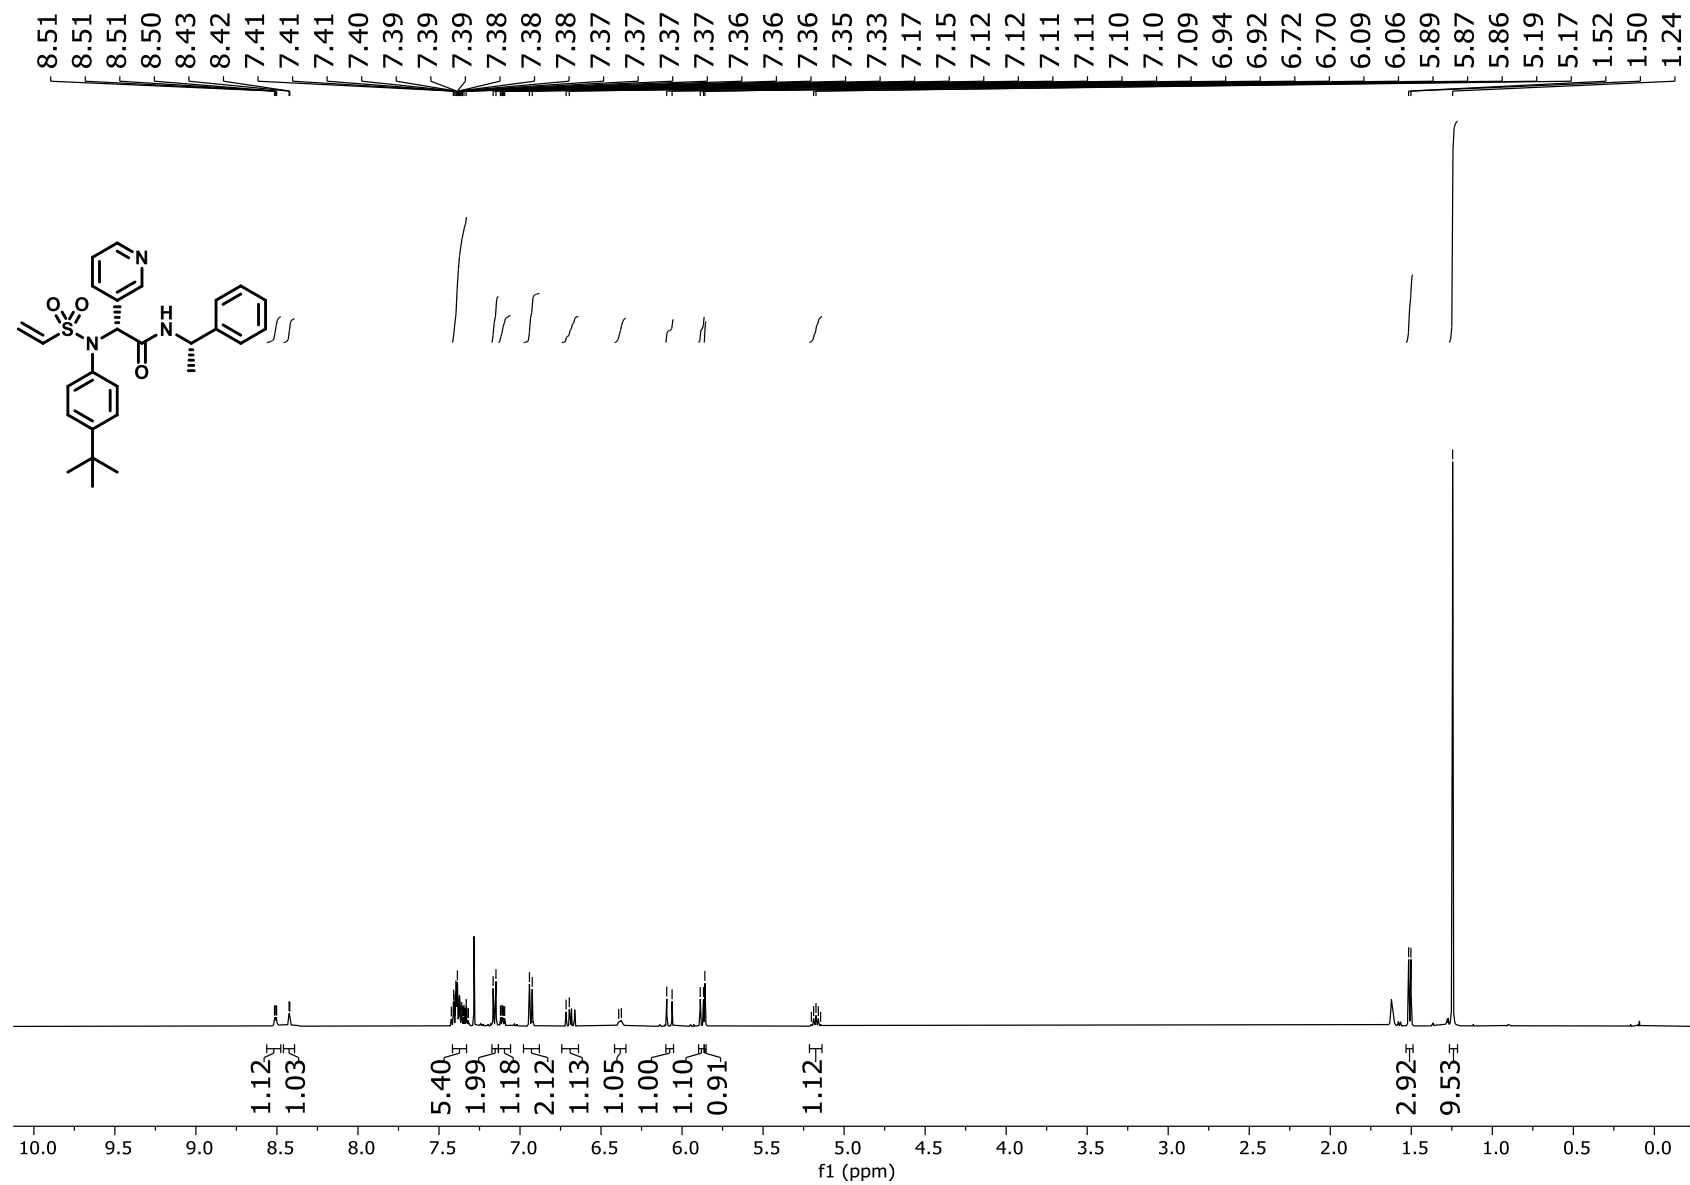

94. Compound **14g** <sup>13</sup>C NMR

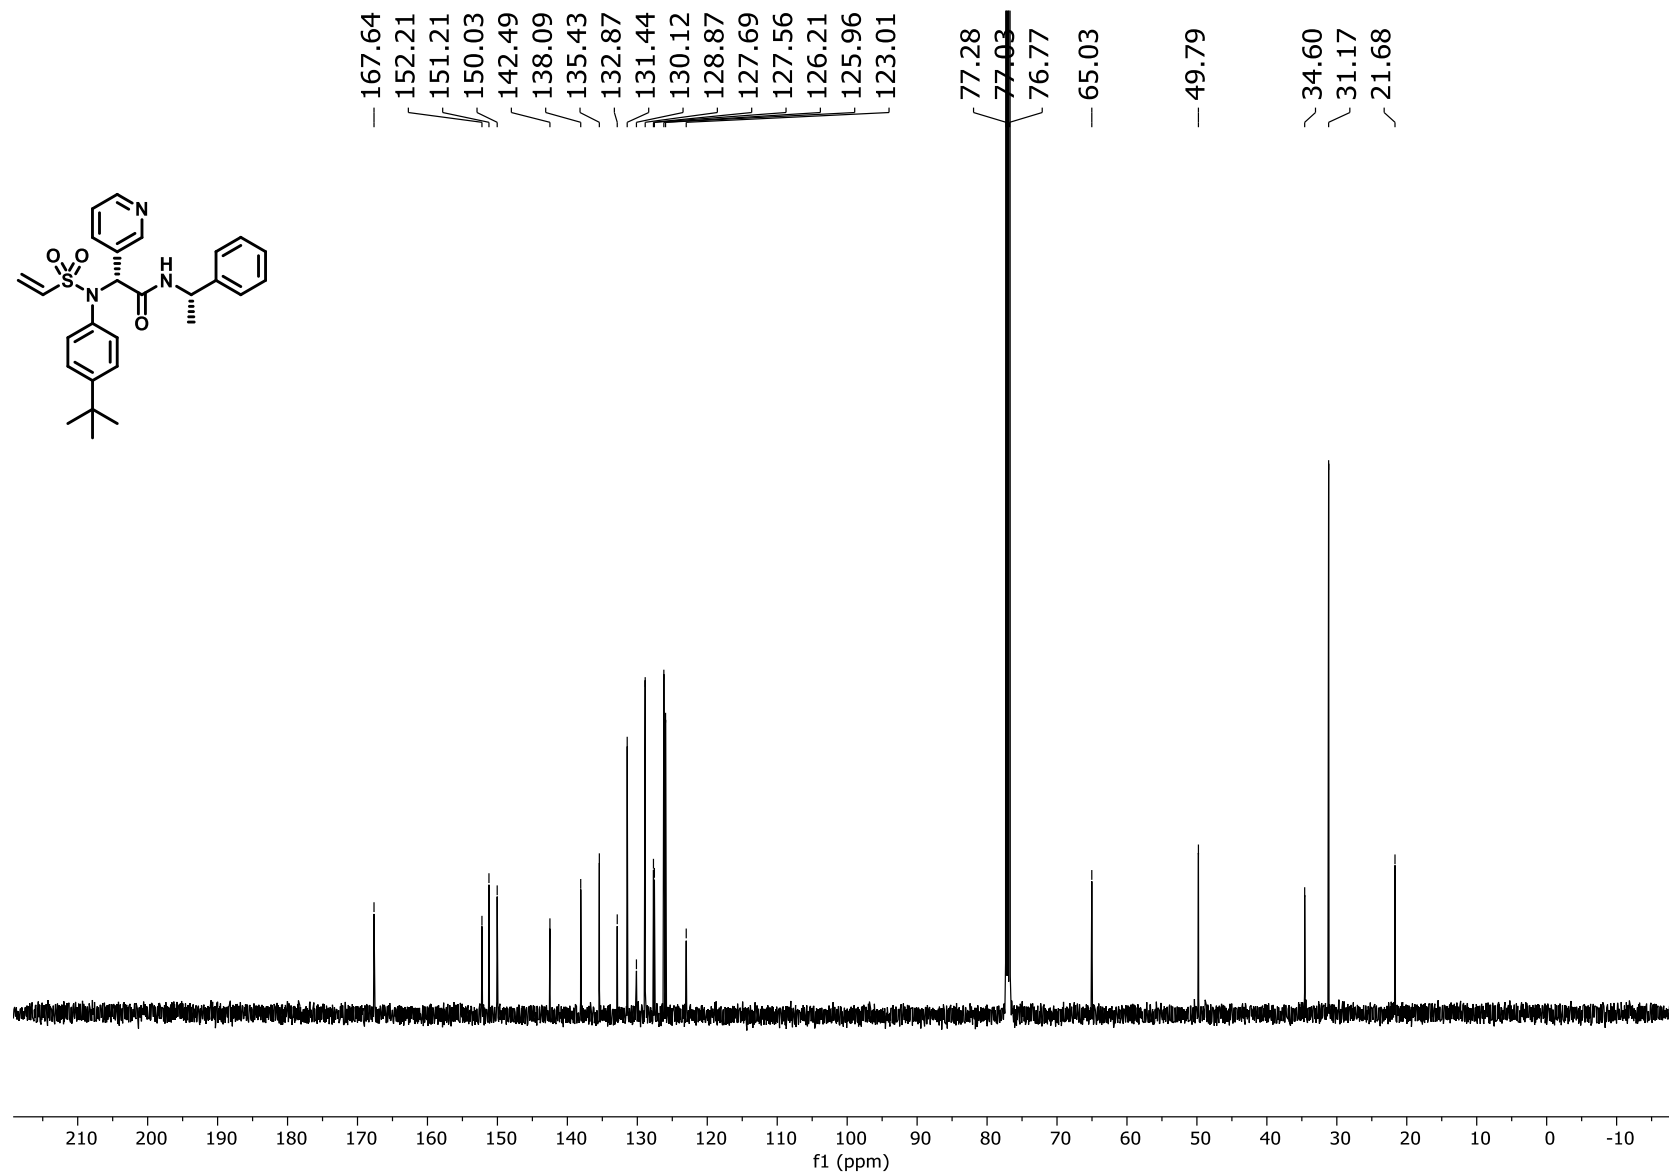

95. Compound **14h** <sup>1</sup>H NMR

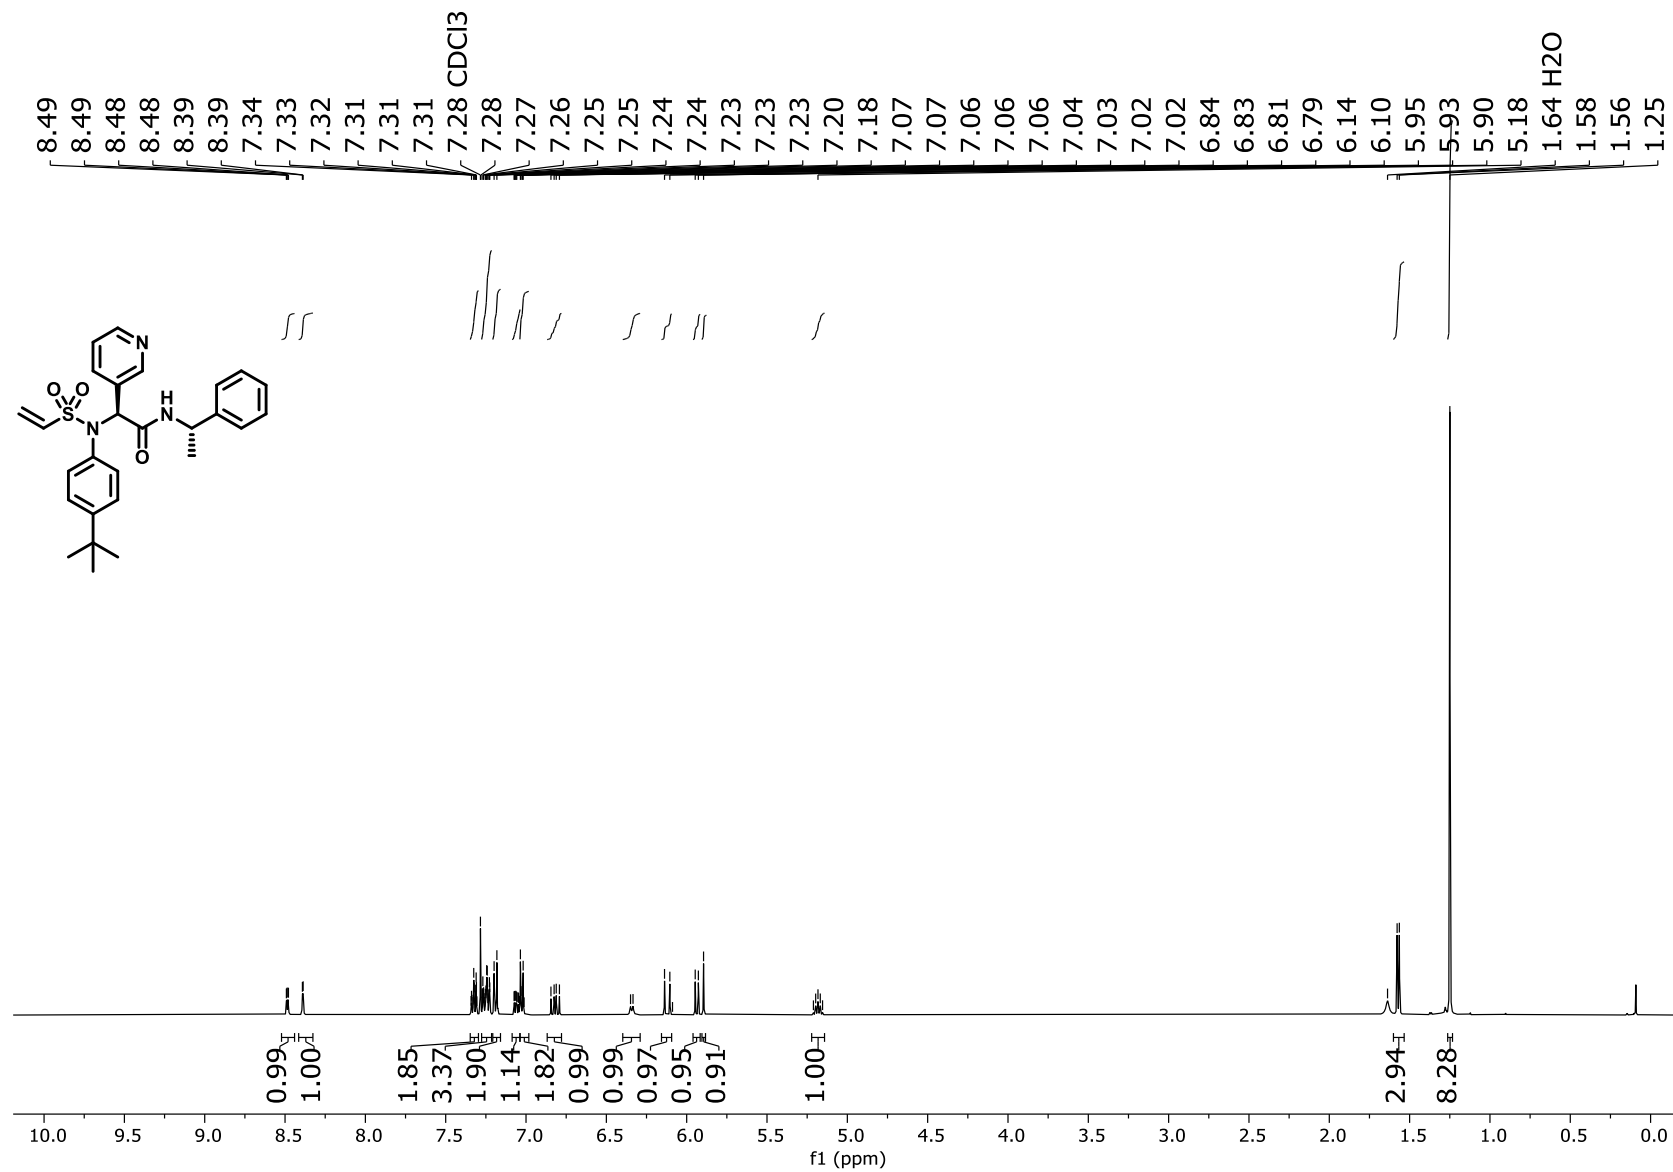

96. Compound **14h** <sup>13</sup>C NMR

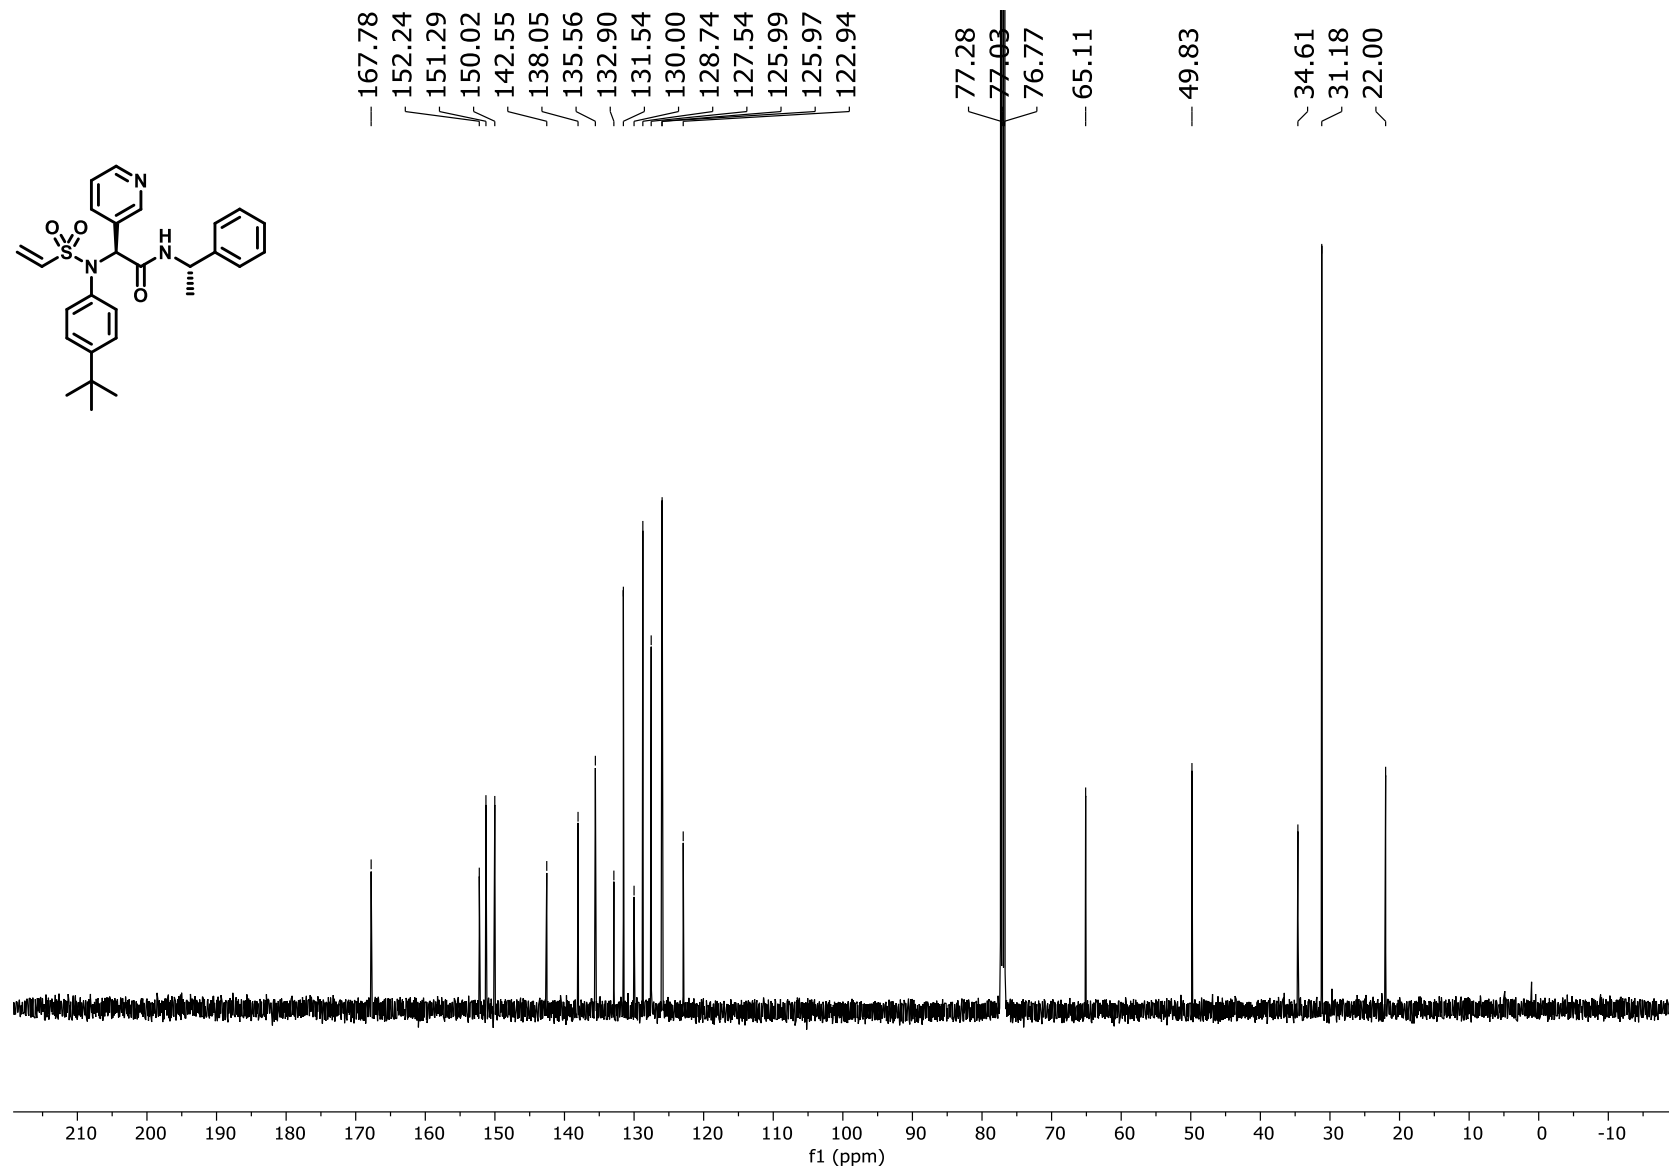

97. Compound 15a <sup>1</sup>H NMR

JT-45.10.fid

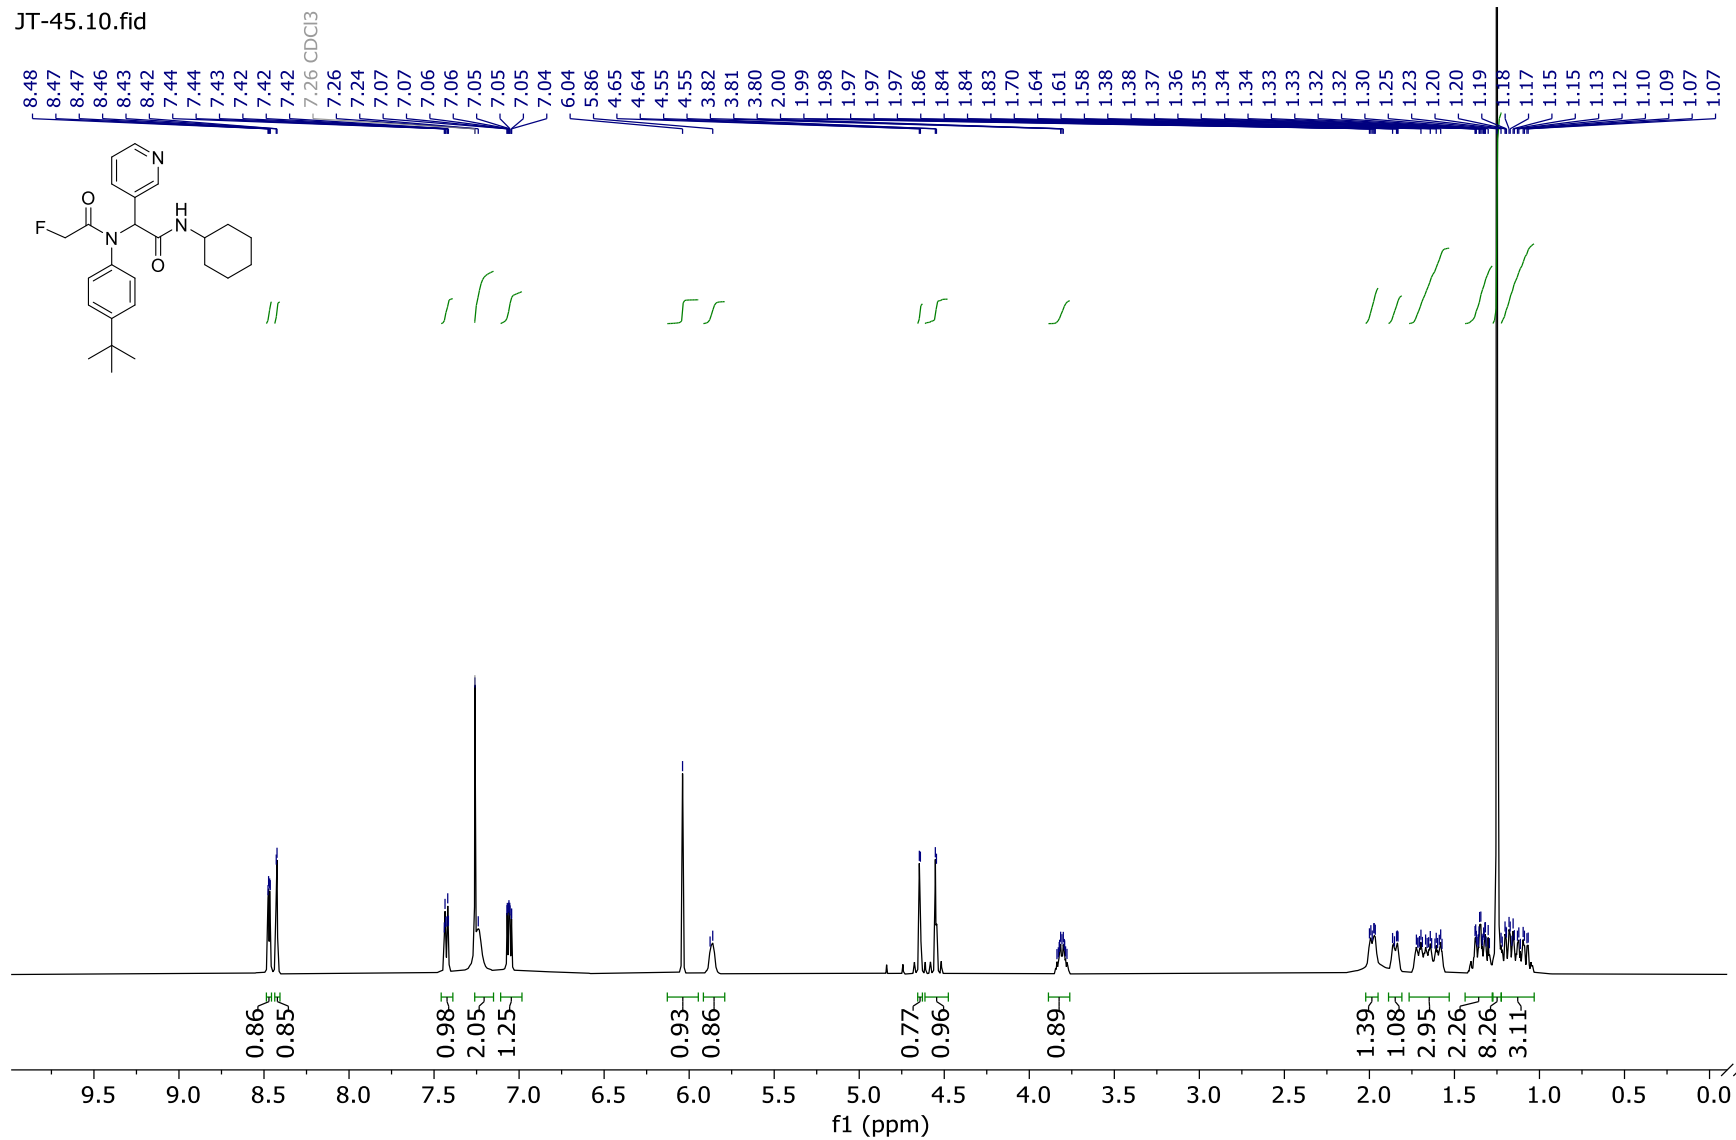

98. Compound **15a** <sup>13</sup>C NMR

JT-45.12.fid

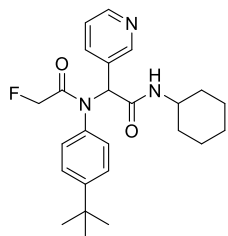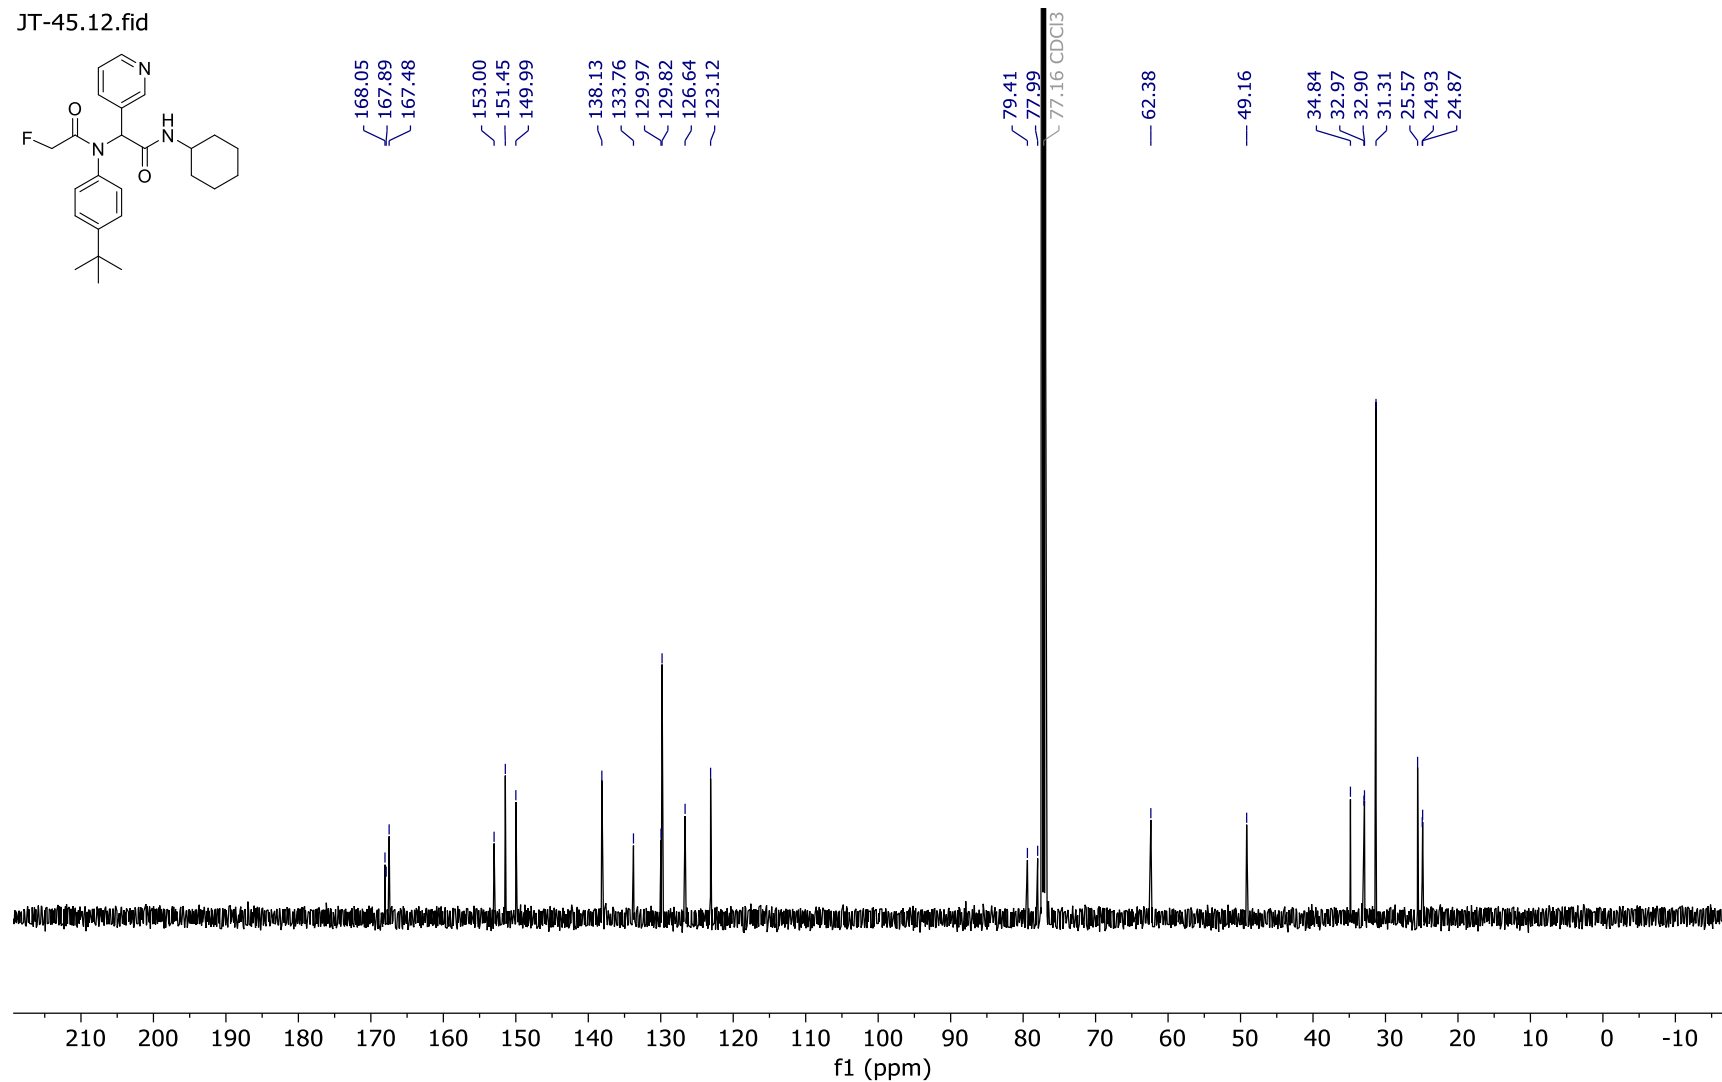

99. Compound **16a** <sup>1</sup>H NMR

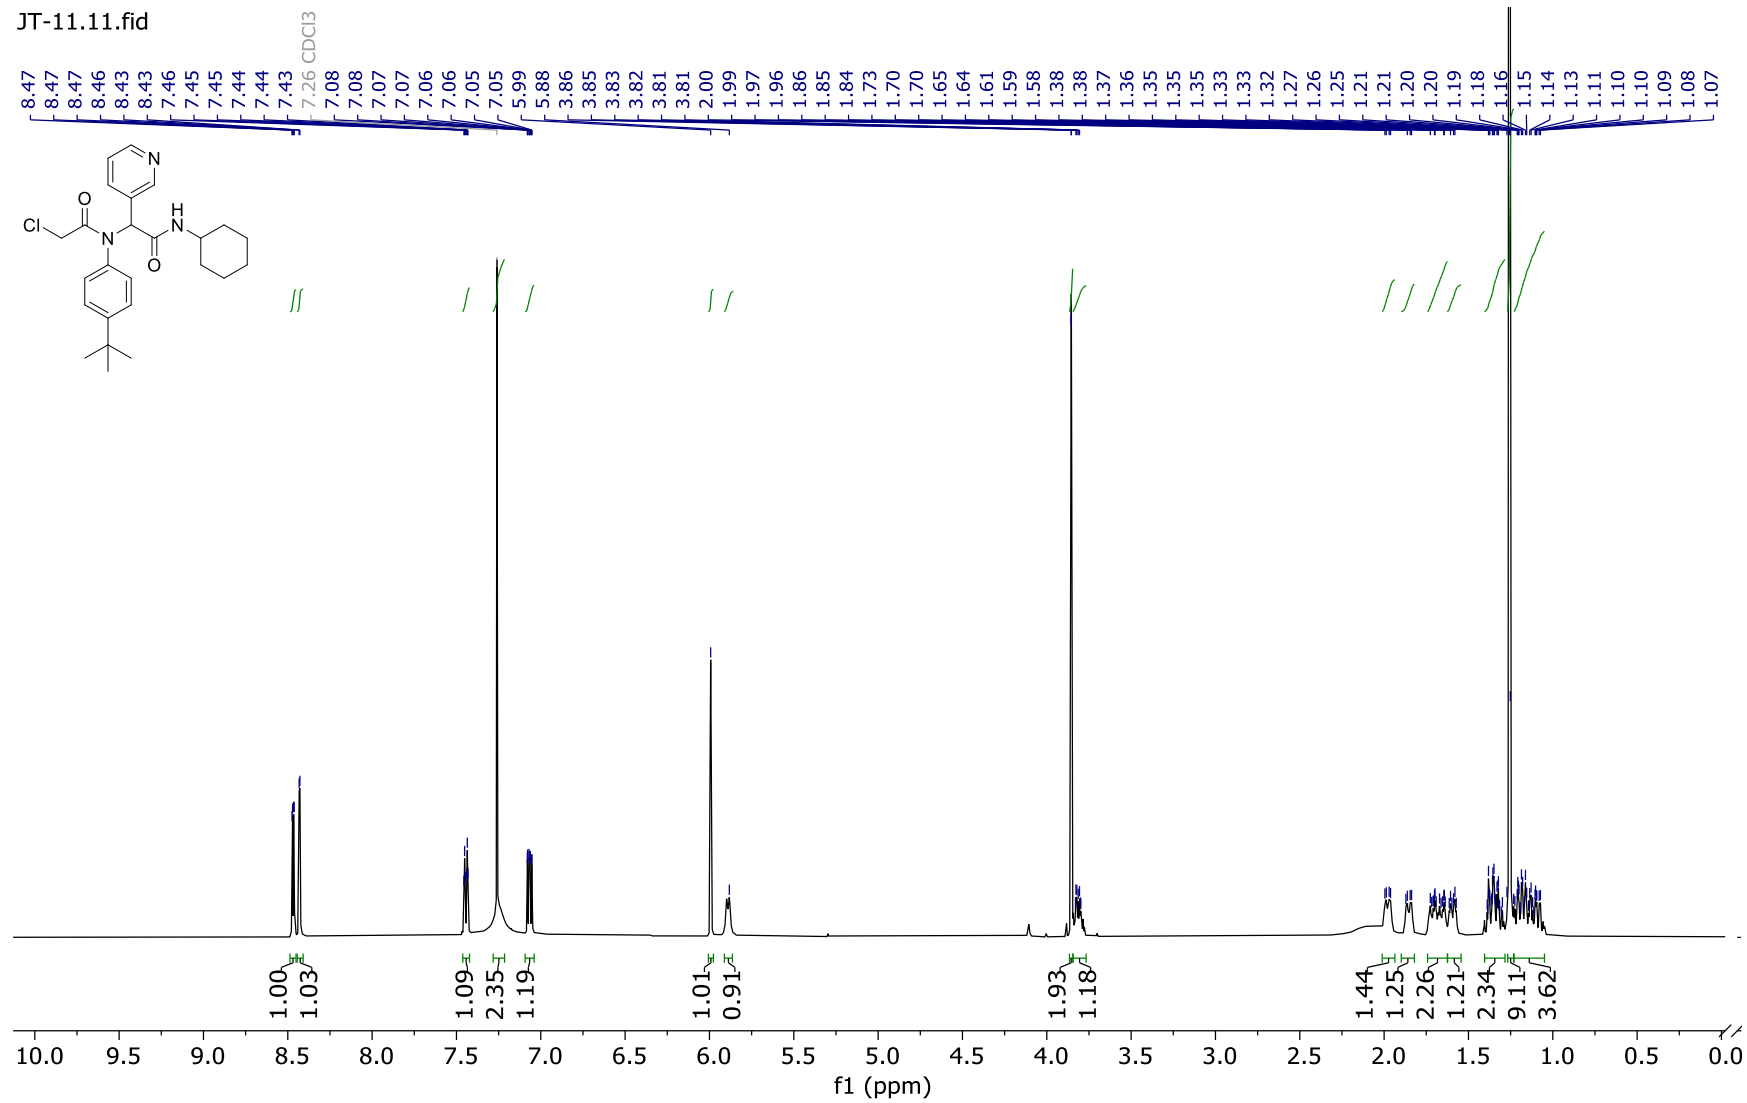

100. Compound **16a** <sup>13</sup>C NMR

JT-11.12.fid

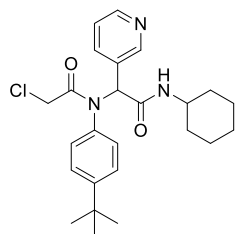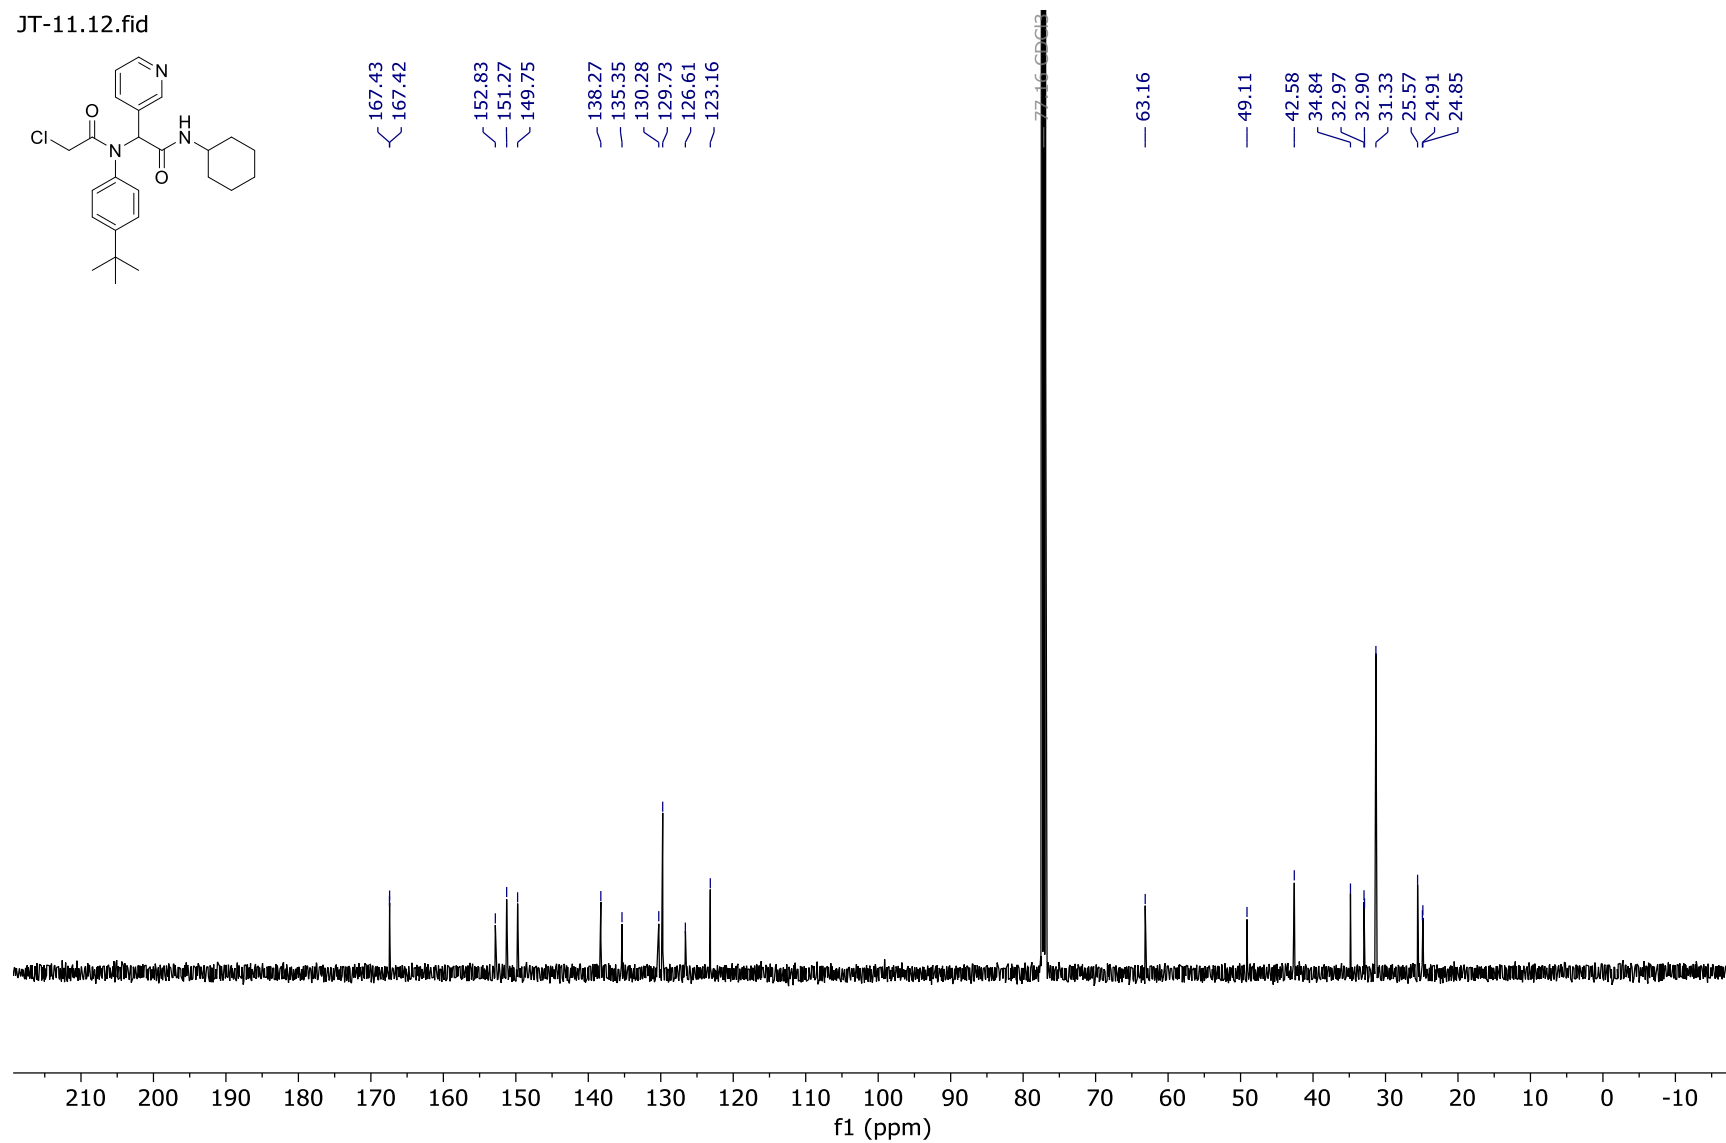



101. Compound **16b** <sup>1</sup>H NMR

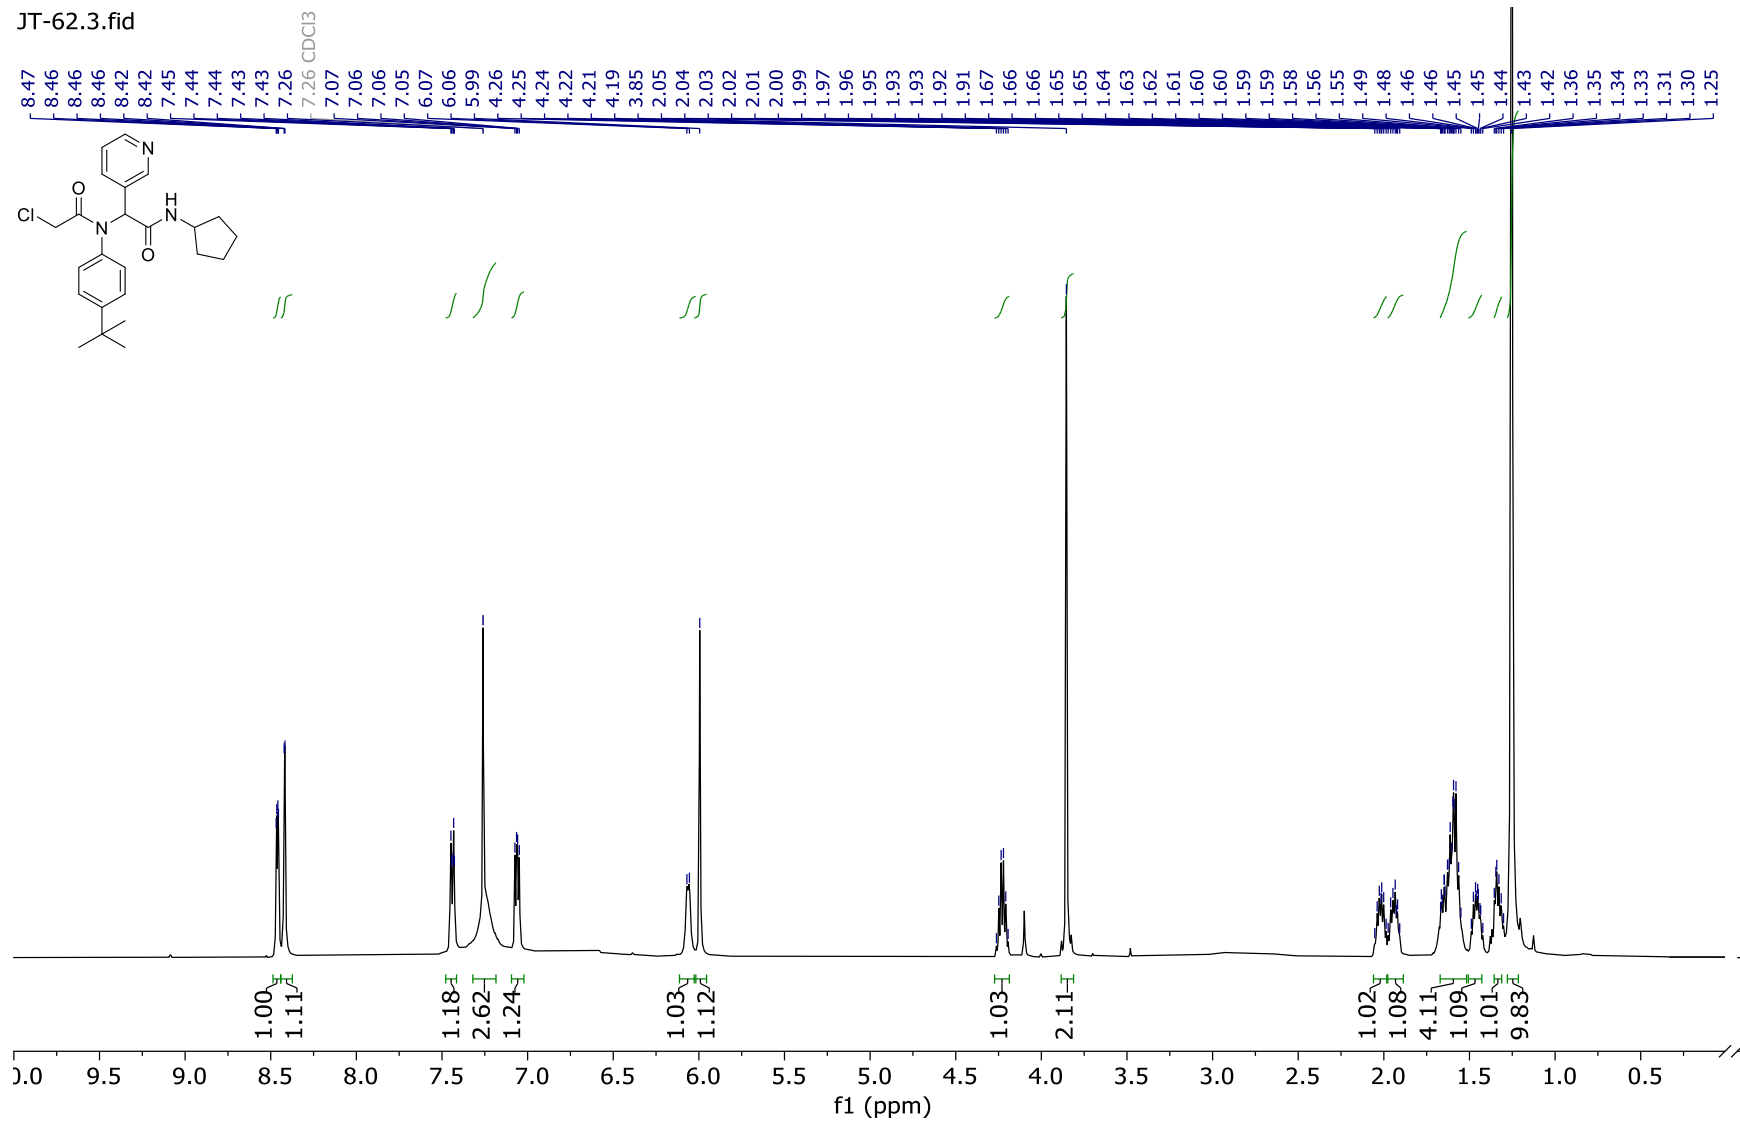

102. Compound **16b** <sup>13</sup>C NMR

JT-62.4.fid

Moitessier

1d\_C13 CDCl3 E:\\ tjutrins 25

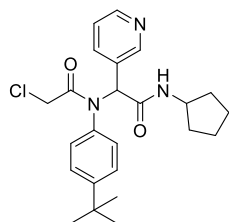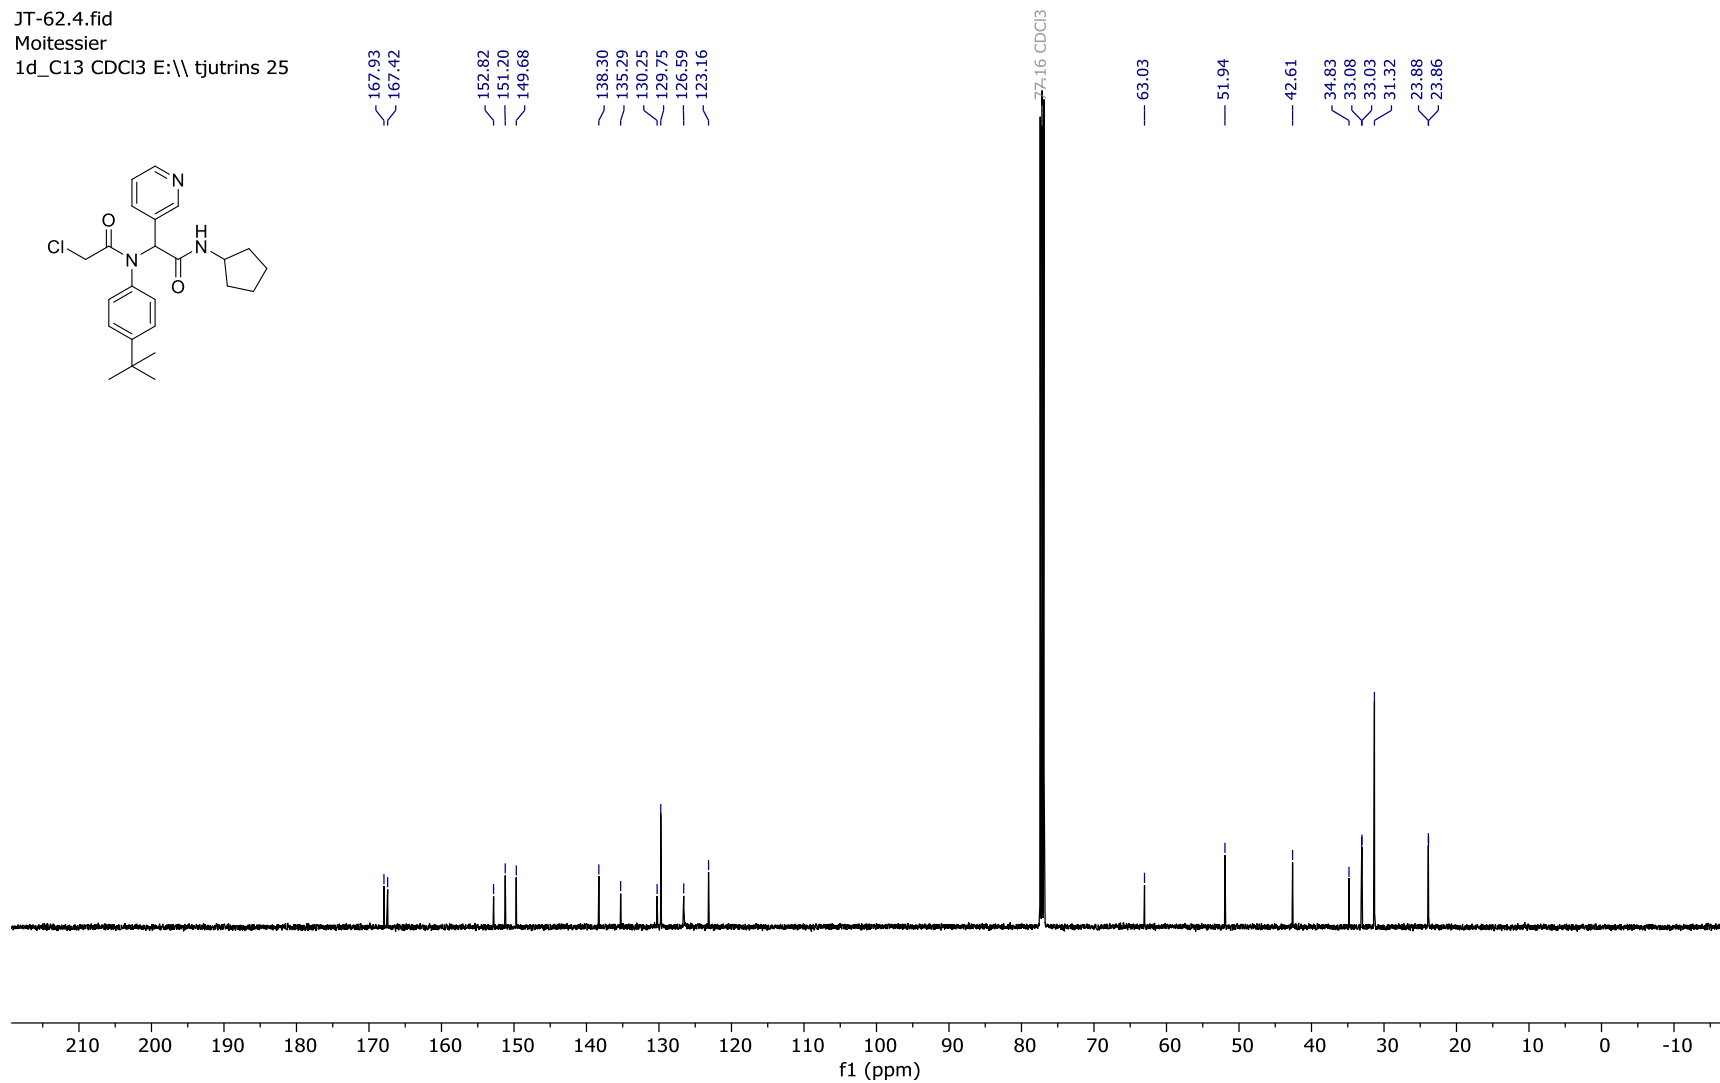

103. Compound **16c** <sup>1</sup>H NMR

JT-63.2.fid

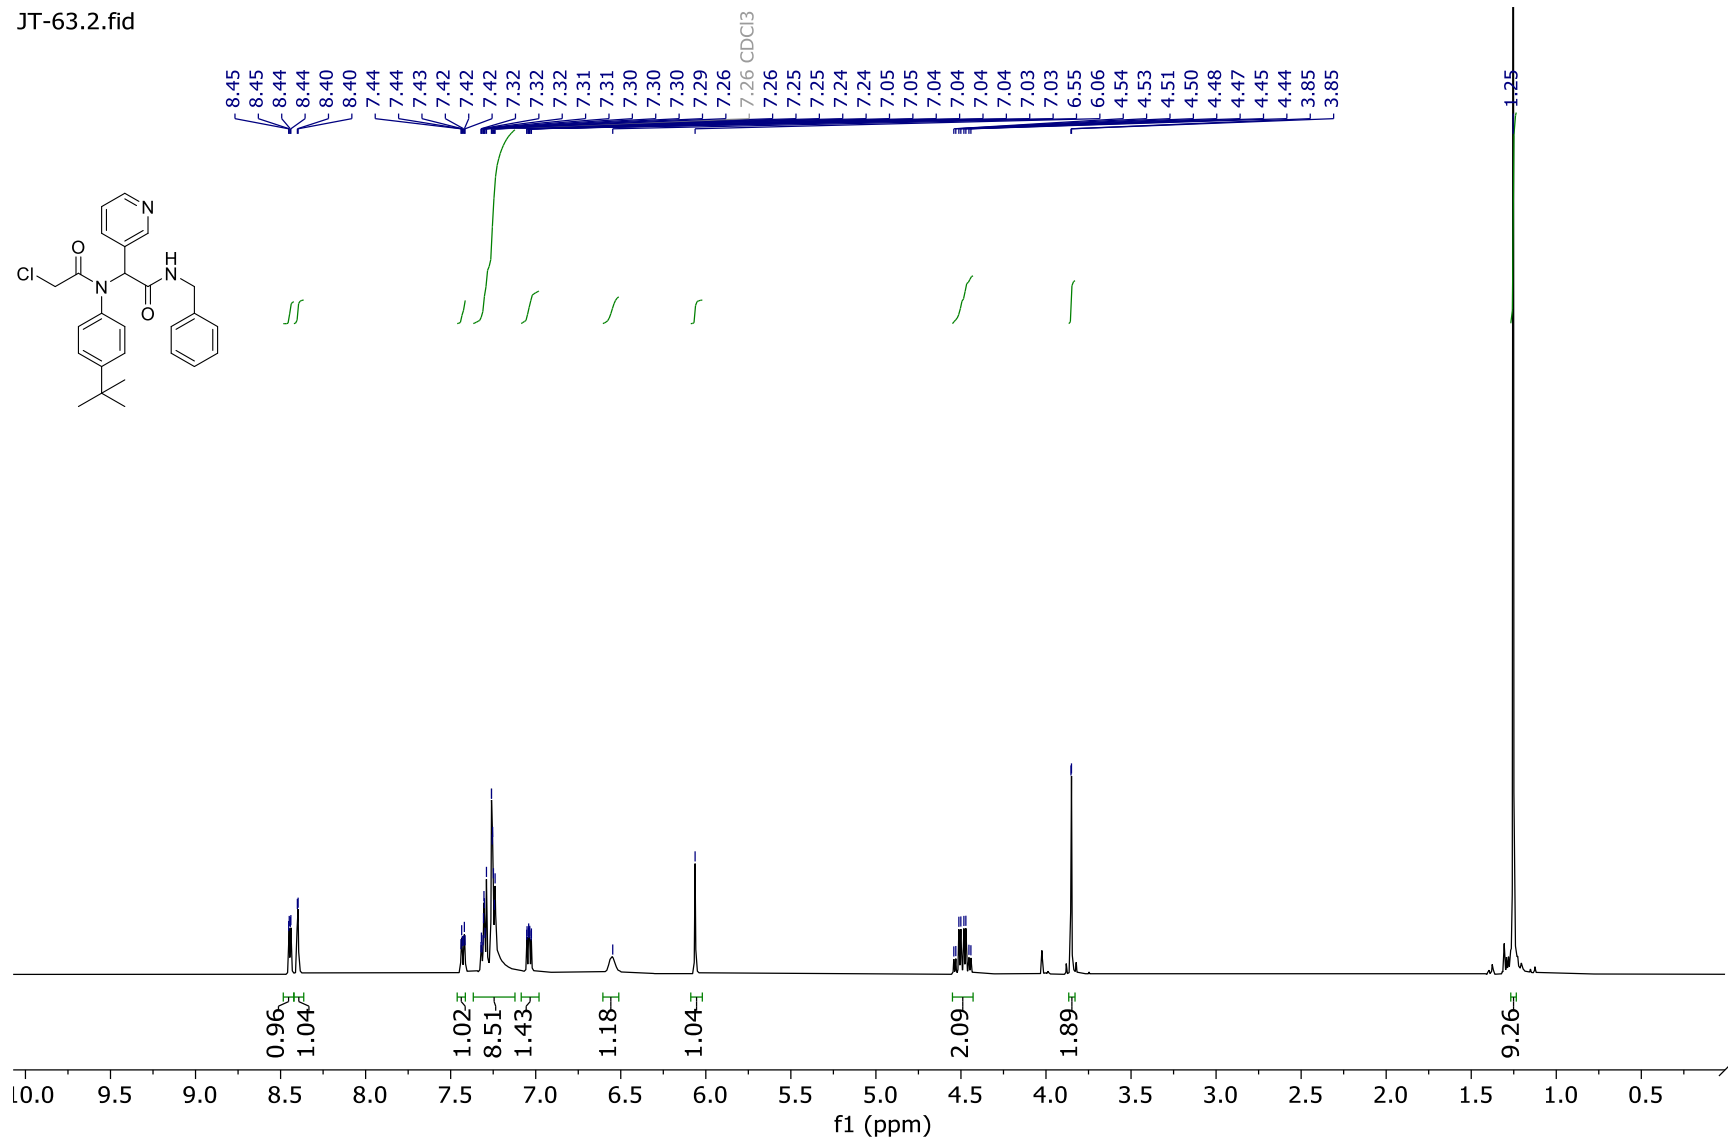

104. Compound **16c** <sup>13</sup>C NMR

JT-63.3.fid

Moitessier

1d\_C13 CDCl3 E:\\ tjutris 26

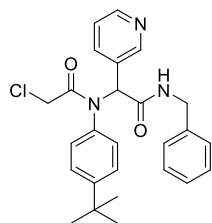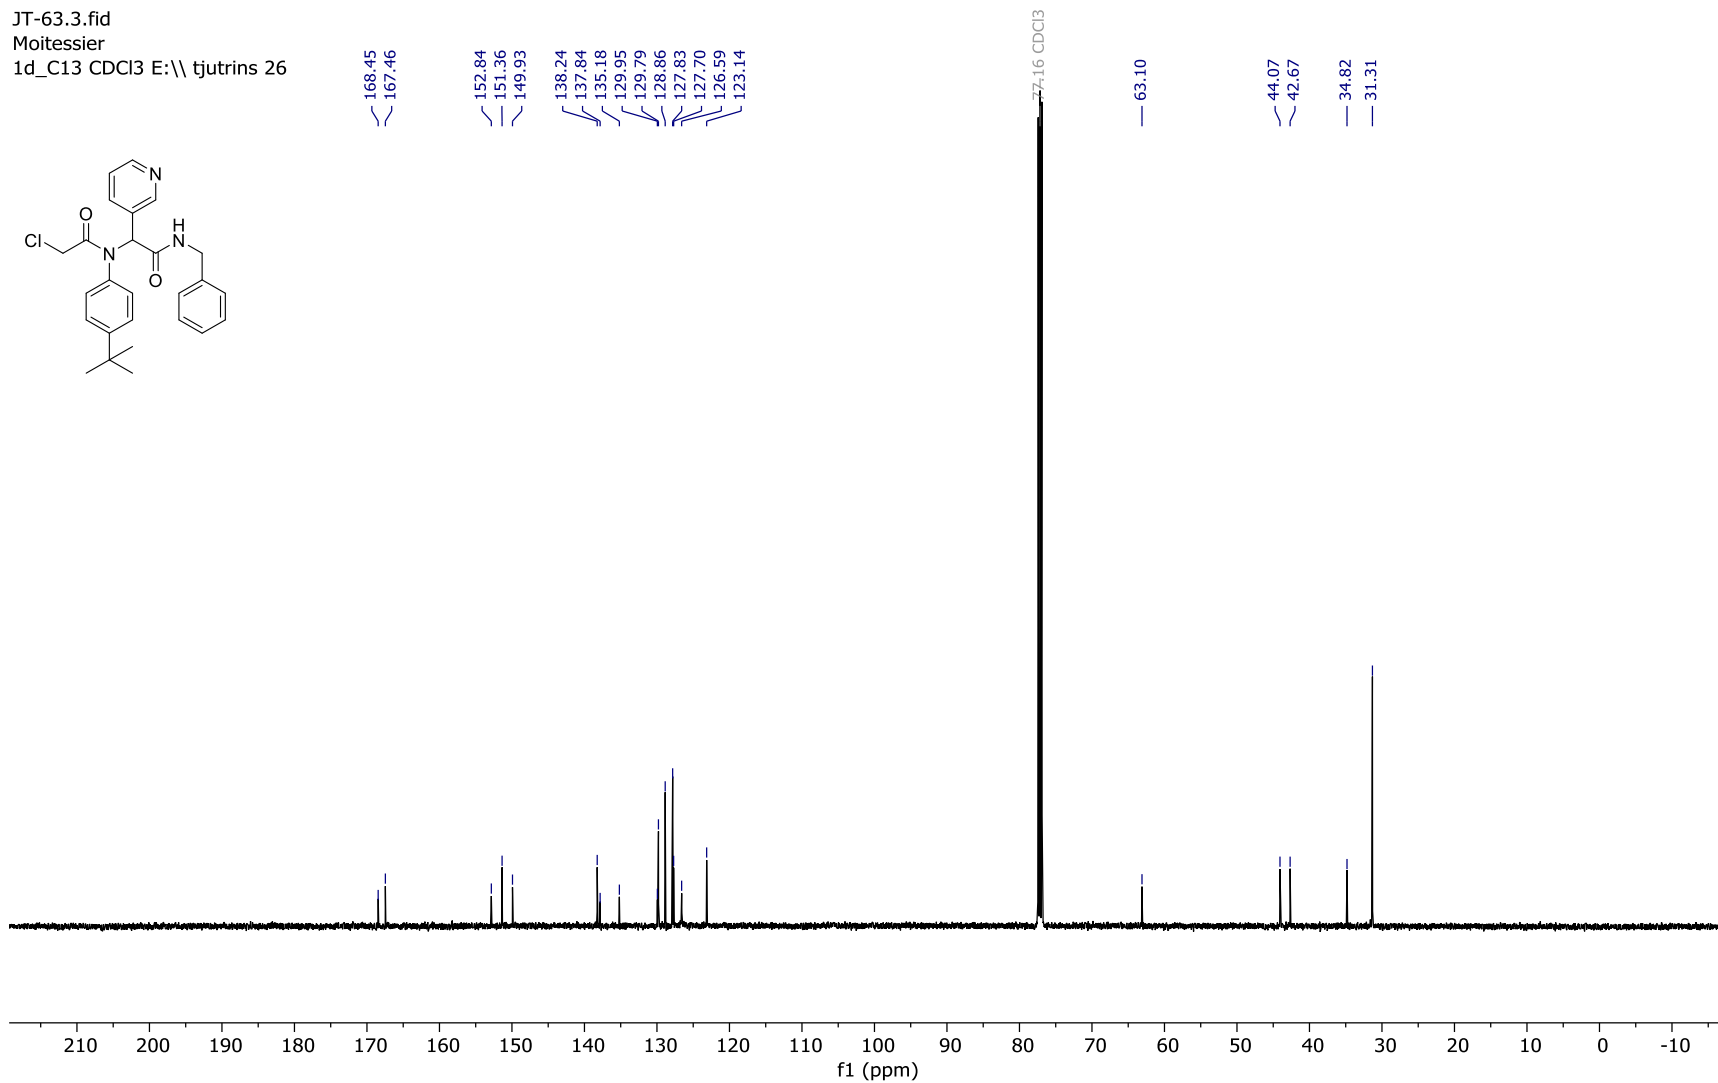

105. Compound **16d** <sup>1</sup>H NMR

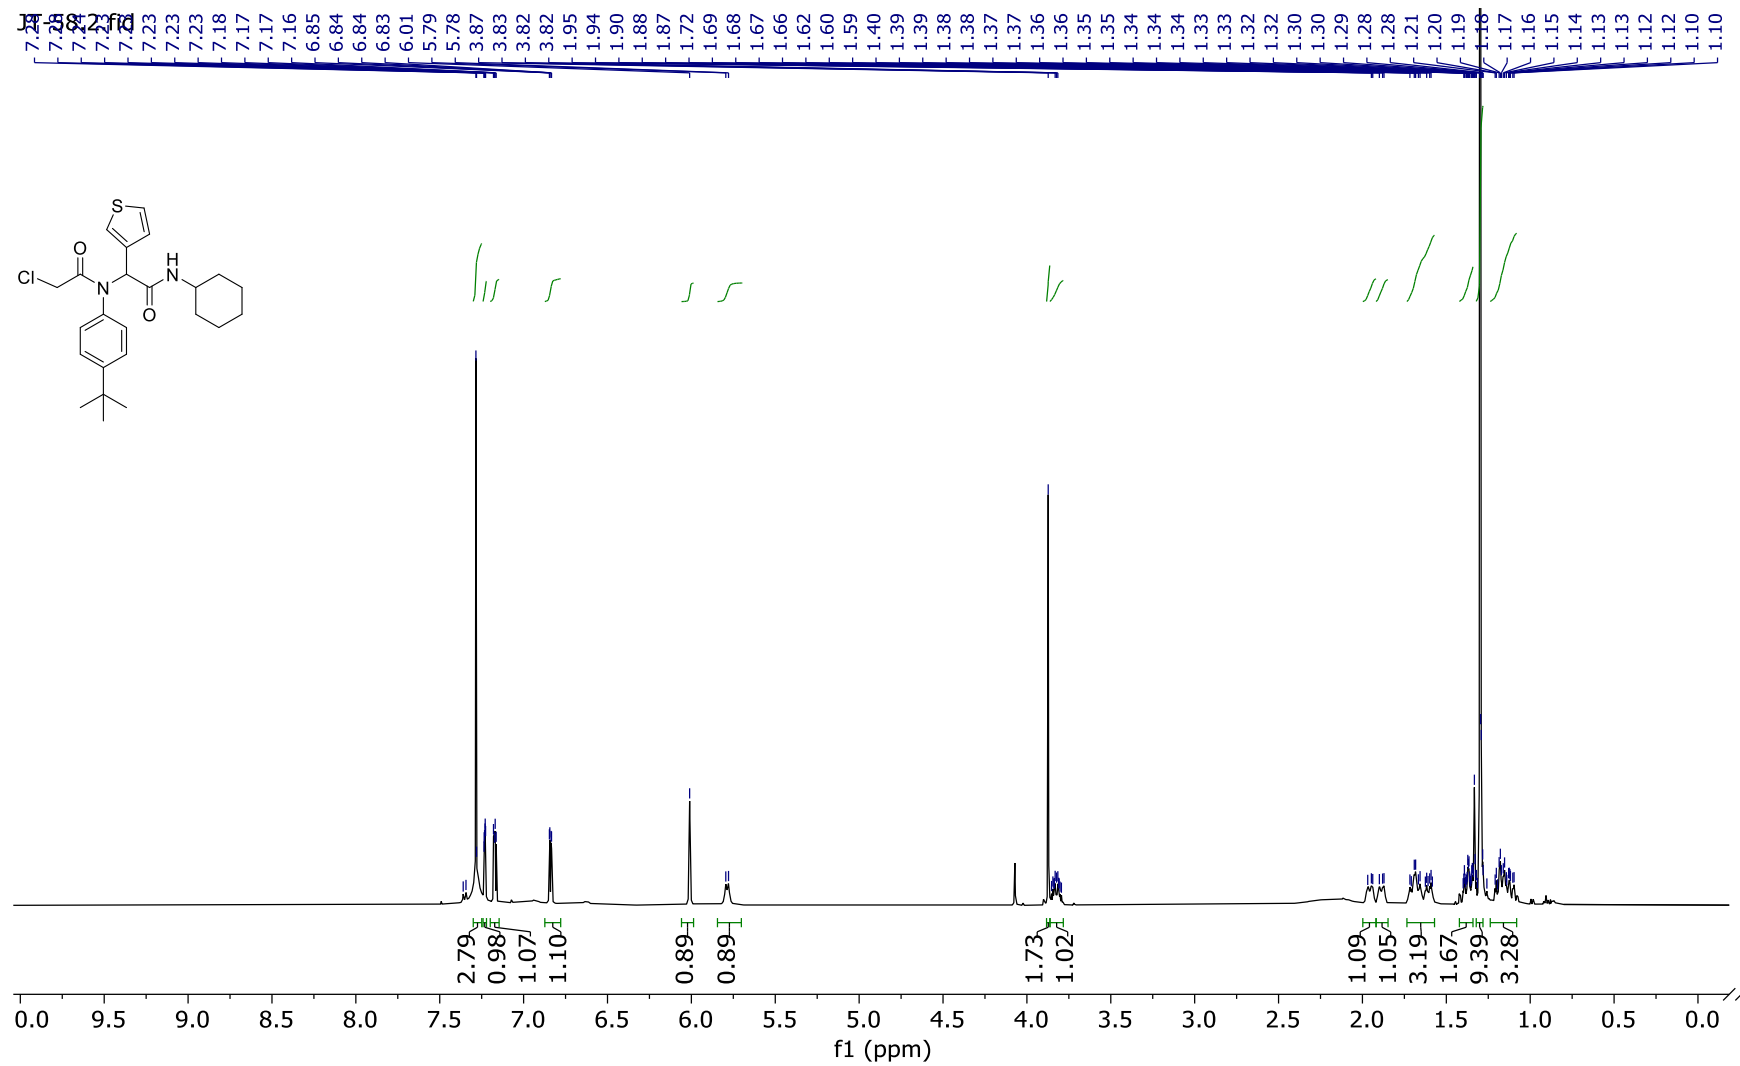

106. Compound **16d** <sup>13</sup>C NMR

JT-58.3.fid

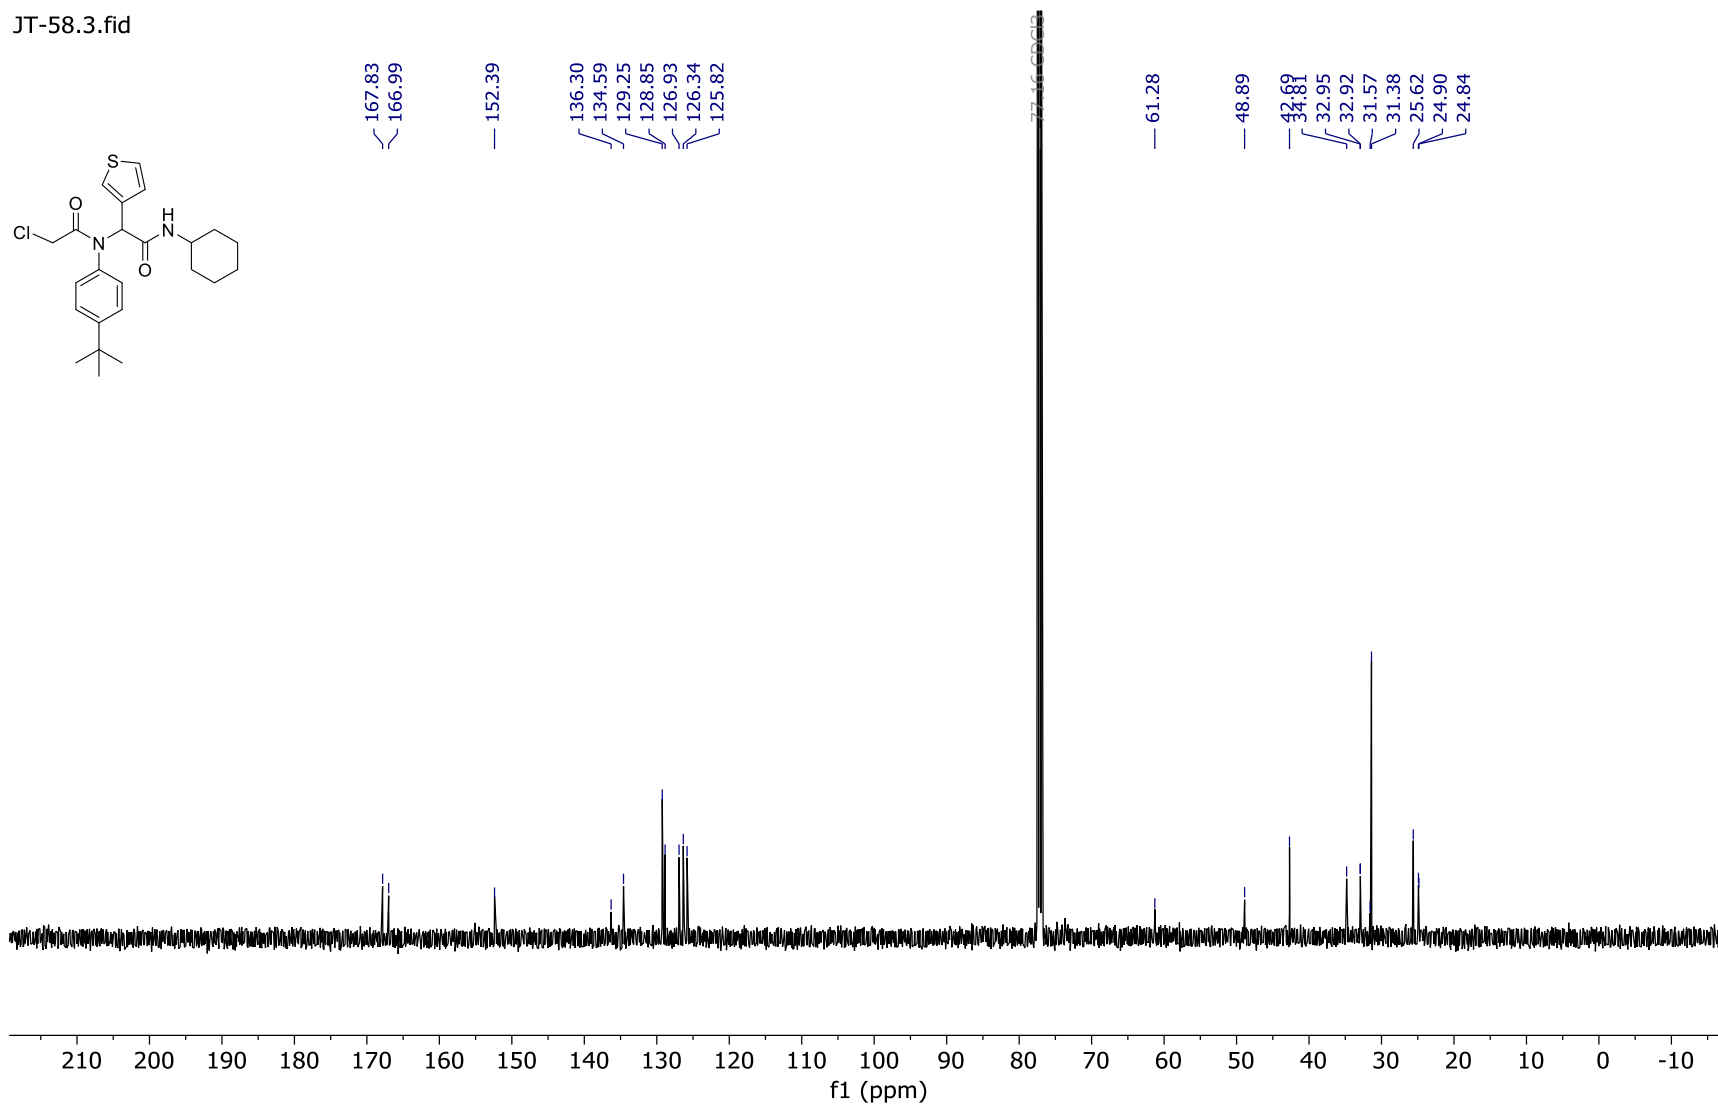

107. Compound **16e** <sup>1</sup>H NMR

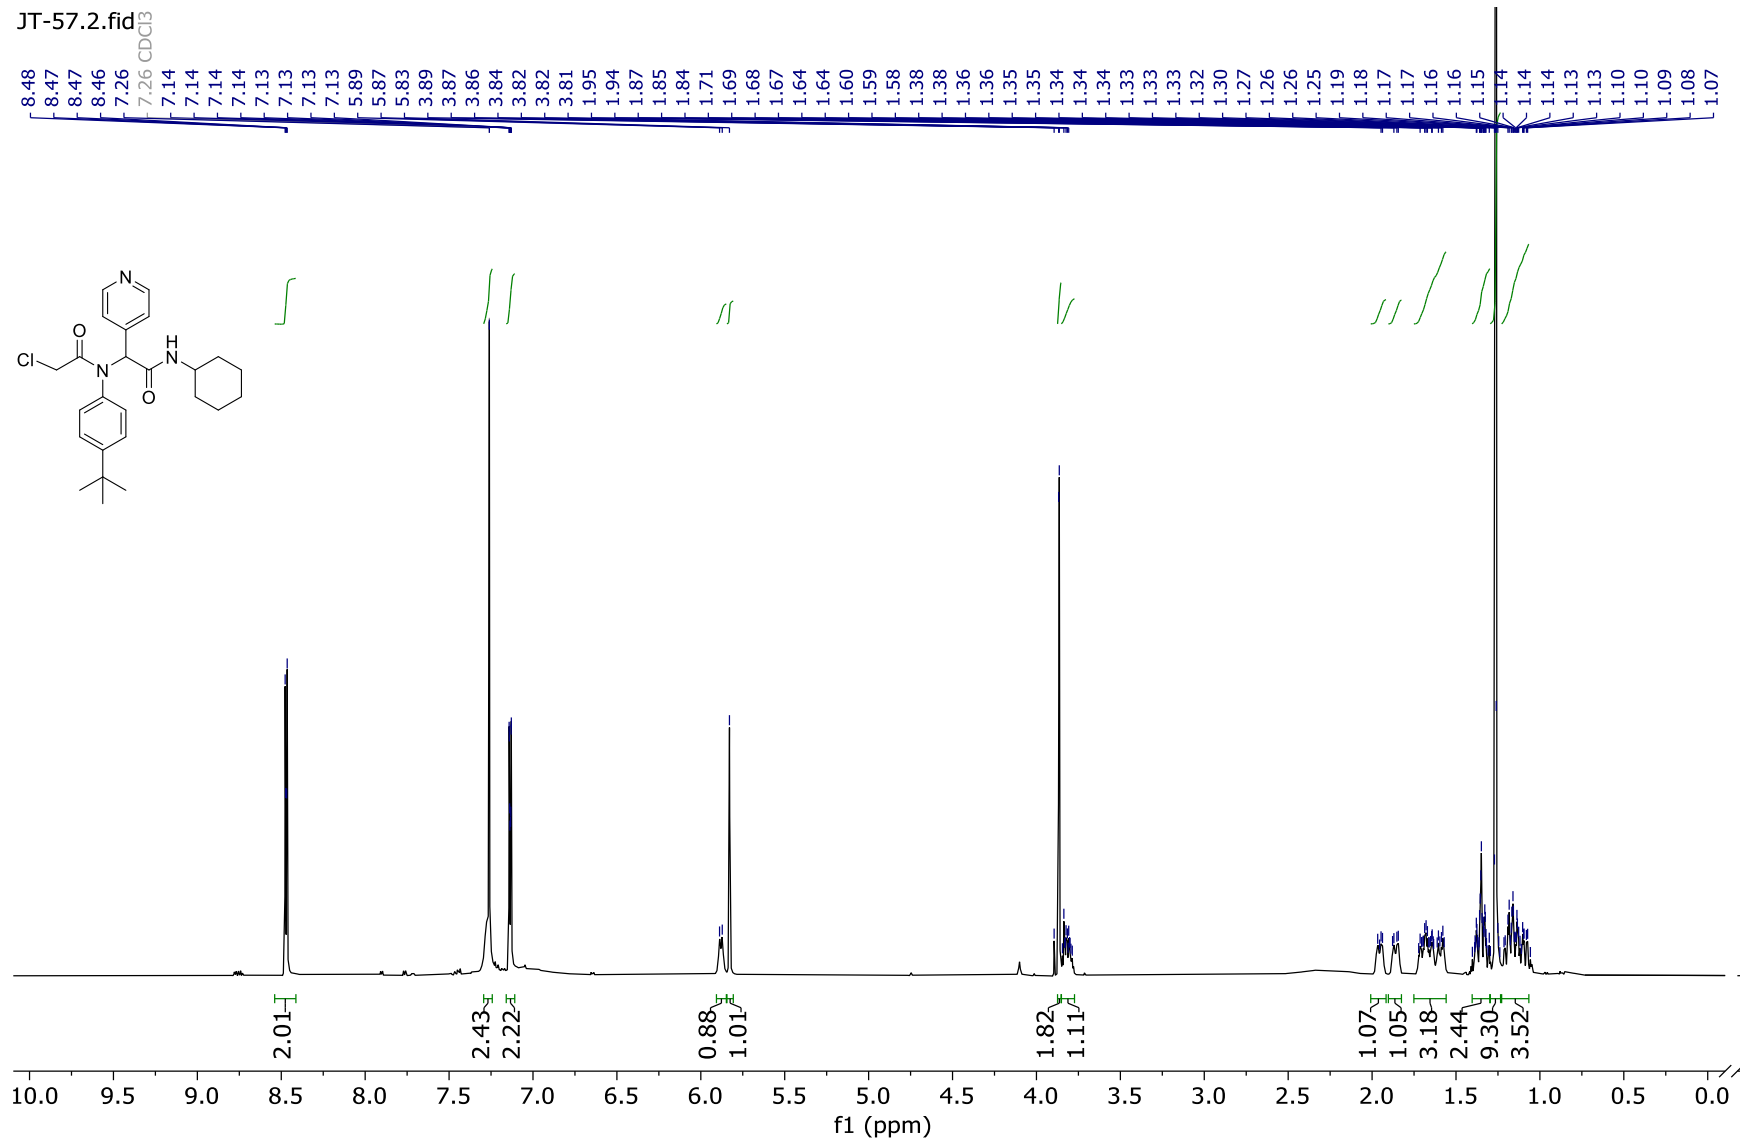

58. Compound **16e** <sup>3</sup>C NMR

JT-57.3.fid

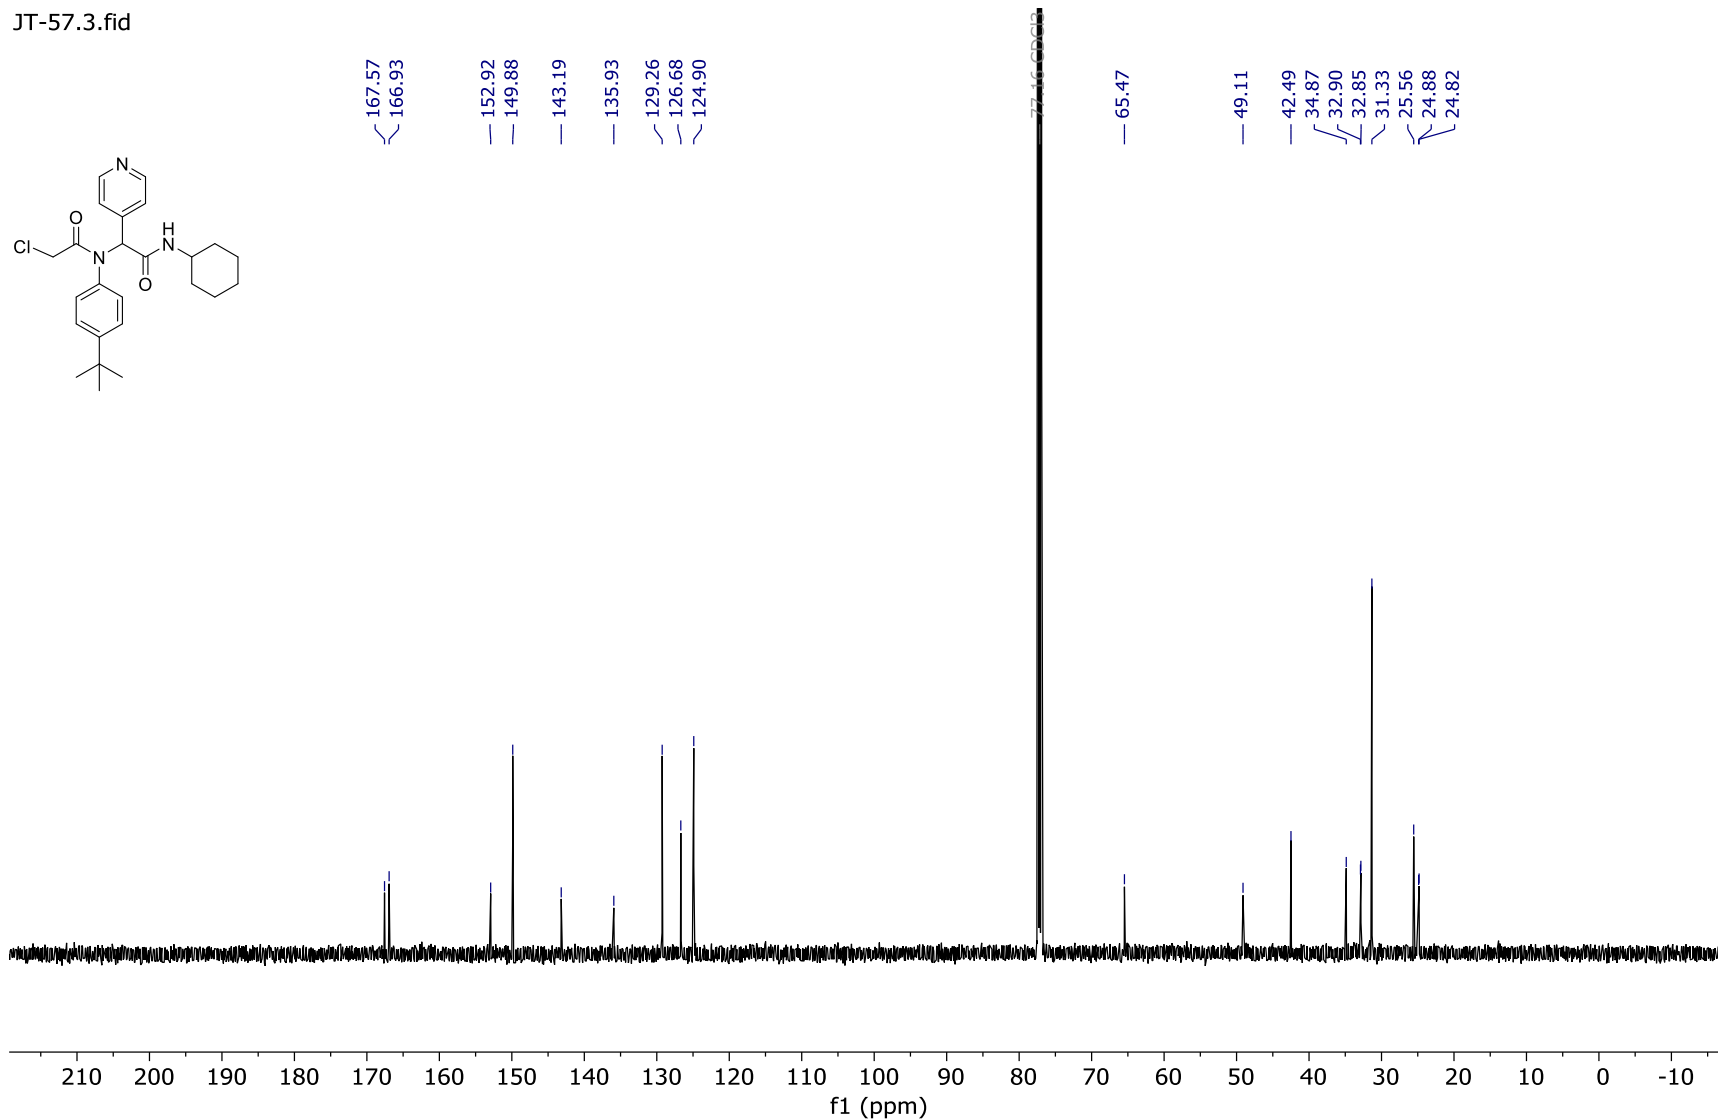



59. Compound **16f** <sup>1</sup>H NMR

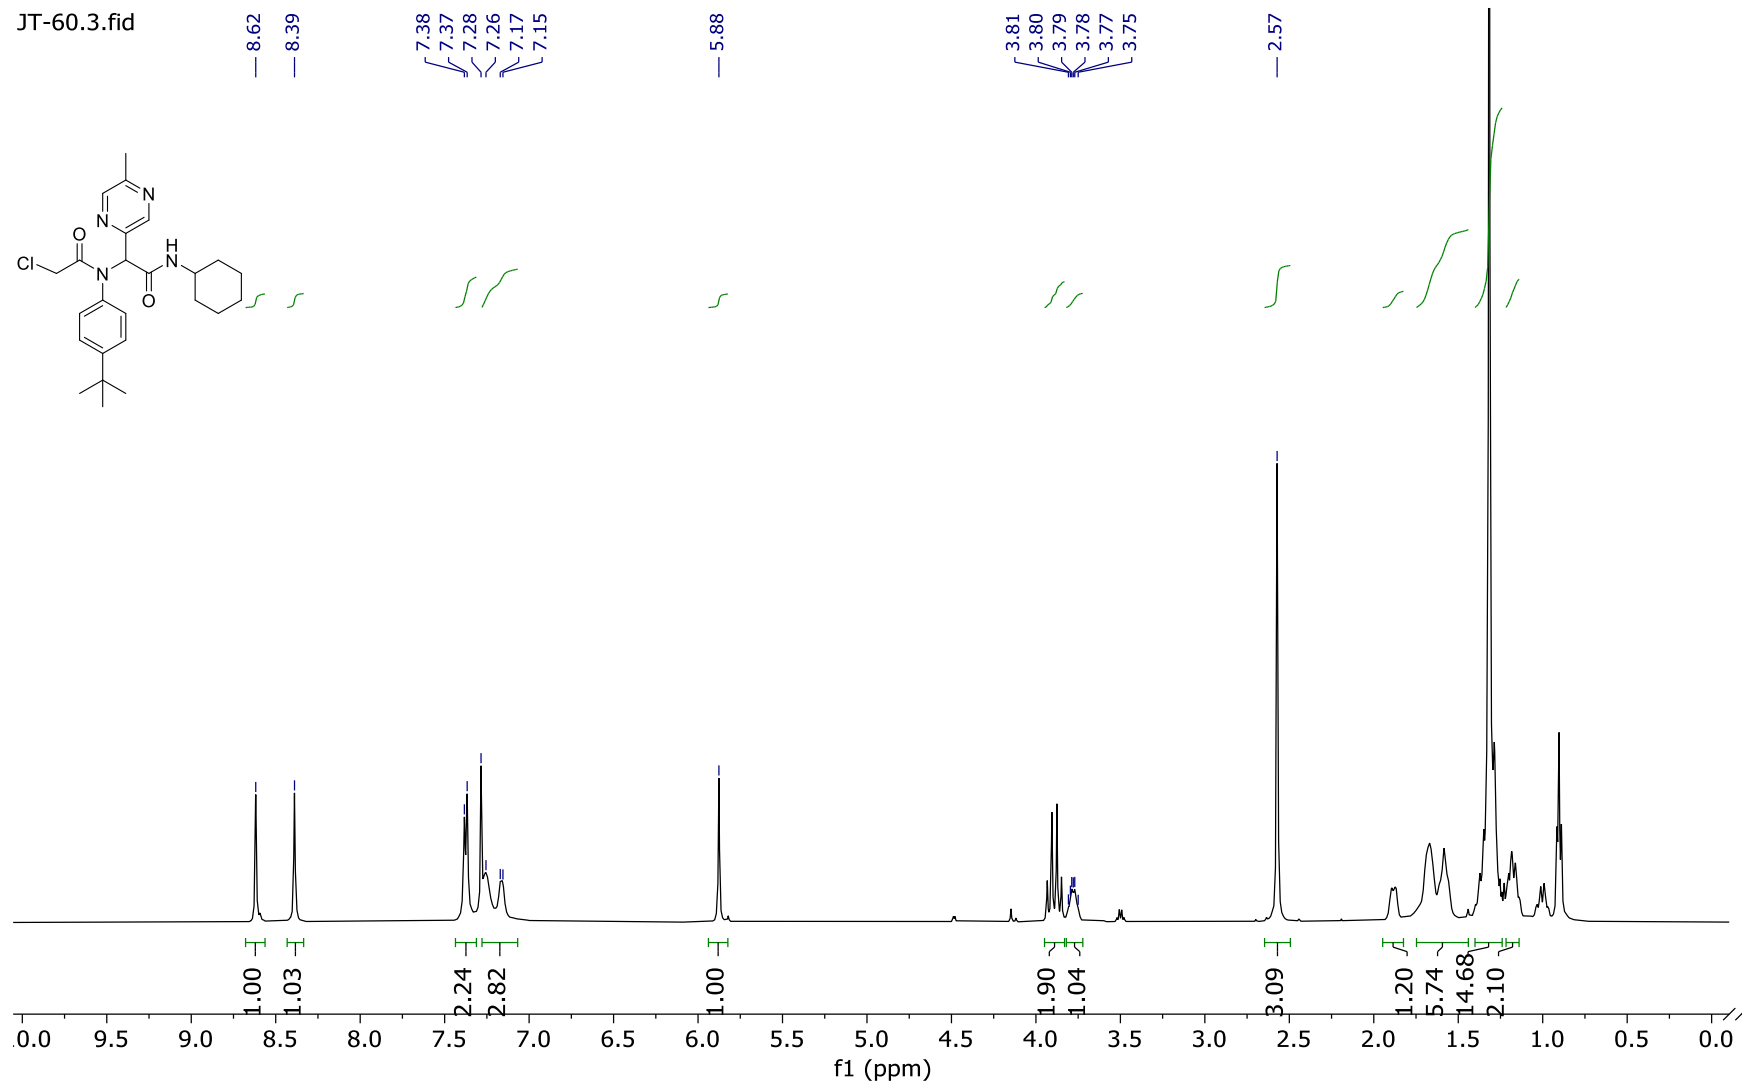

60. Compound **16f** <sup>13</sup>C NMR

JT-60.4.fid  
Moitessier  
1d\_C13 CDCl3 E:\\ tjutrins 24

167.11  
165.73  
153.11  
152.59  
147.62  
144.81  
142.87  
136.87  
128.87  
126.66  
65.99  
48.50  
42.31  
34.75  
32.59  
32.49  
31.60  
31.24  
25.48  
24.57  
24.50  
22.66  
21.31  
14.13

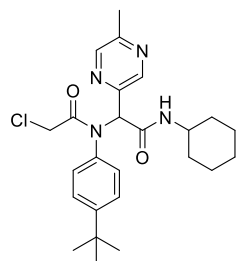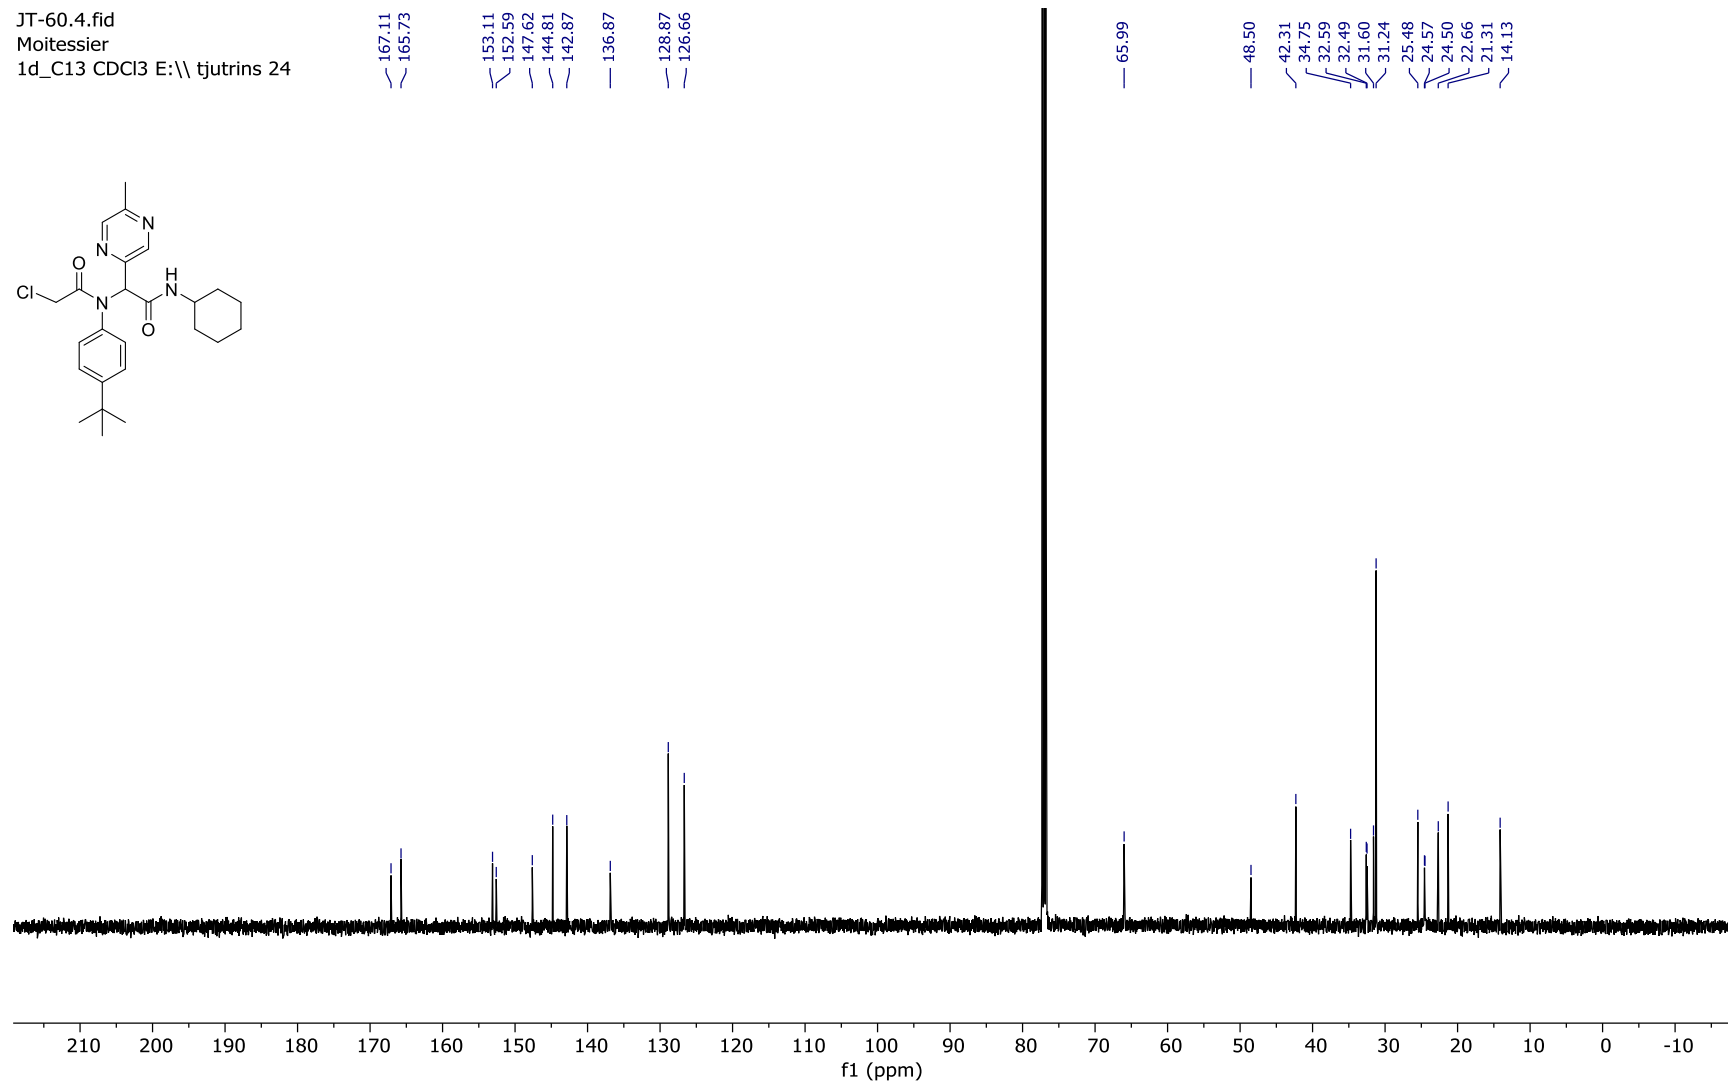

61. Compound 17a <sup>1</sup>H NMR

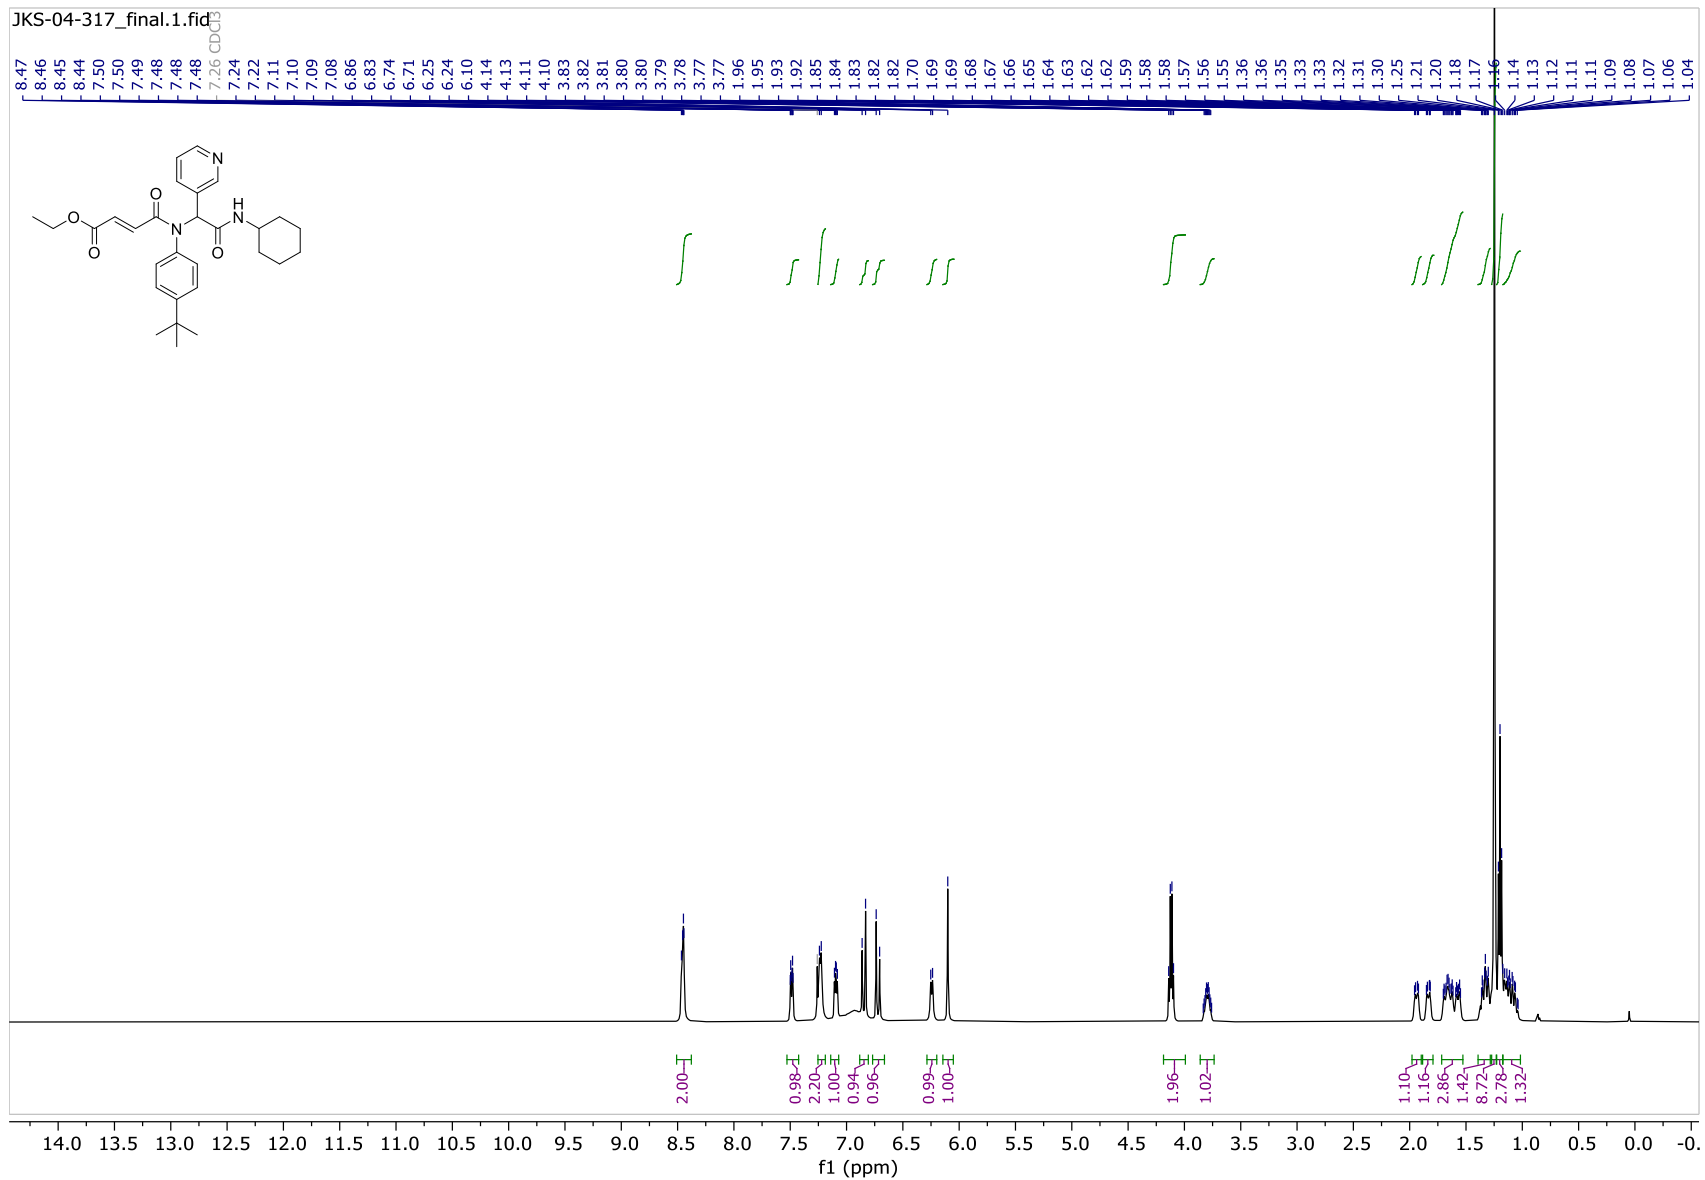

62. Compound **17a** <sup>13</sup>C NMR

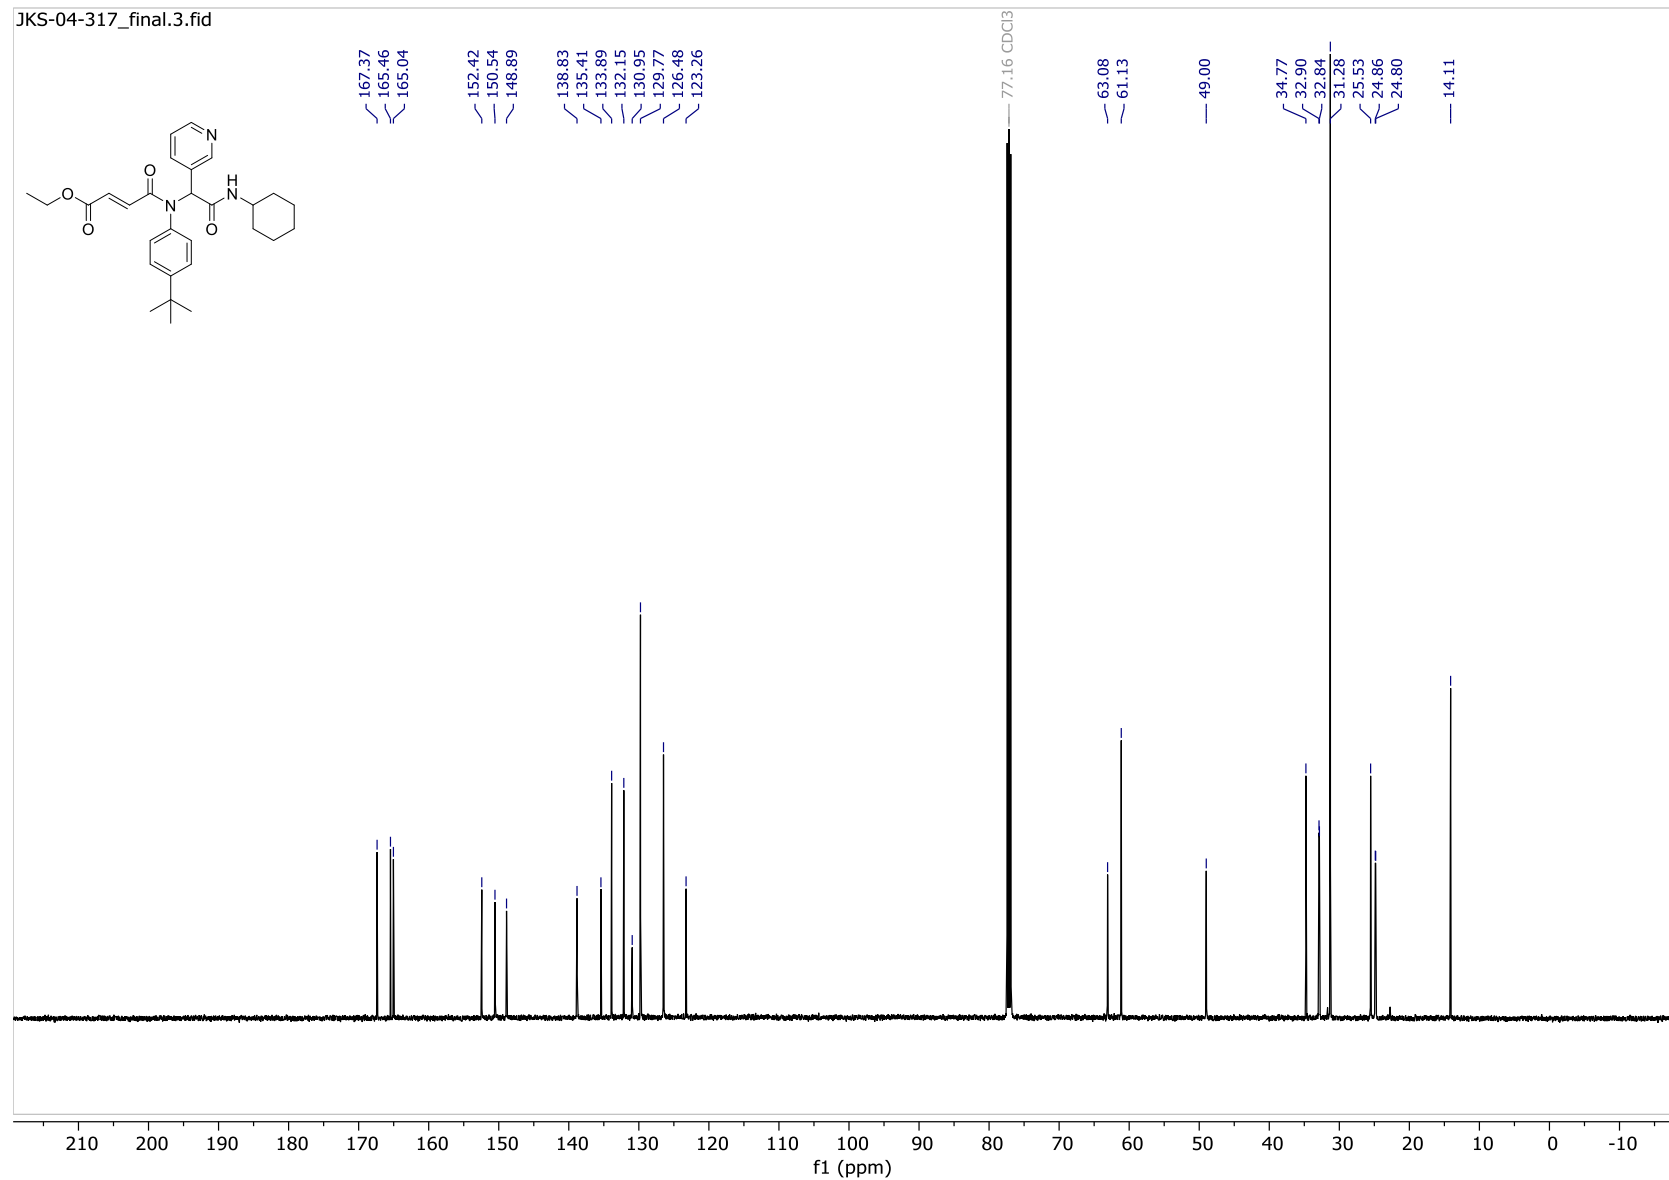

63. Compound **18a** <sup>1</sup>H NMR

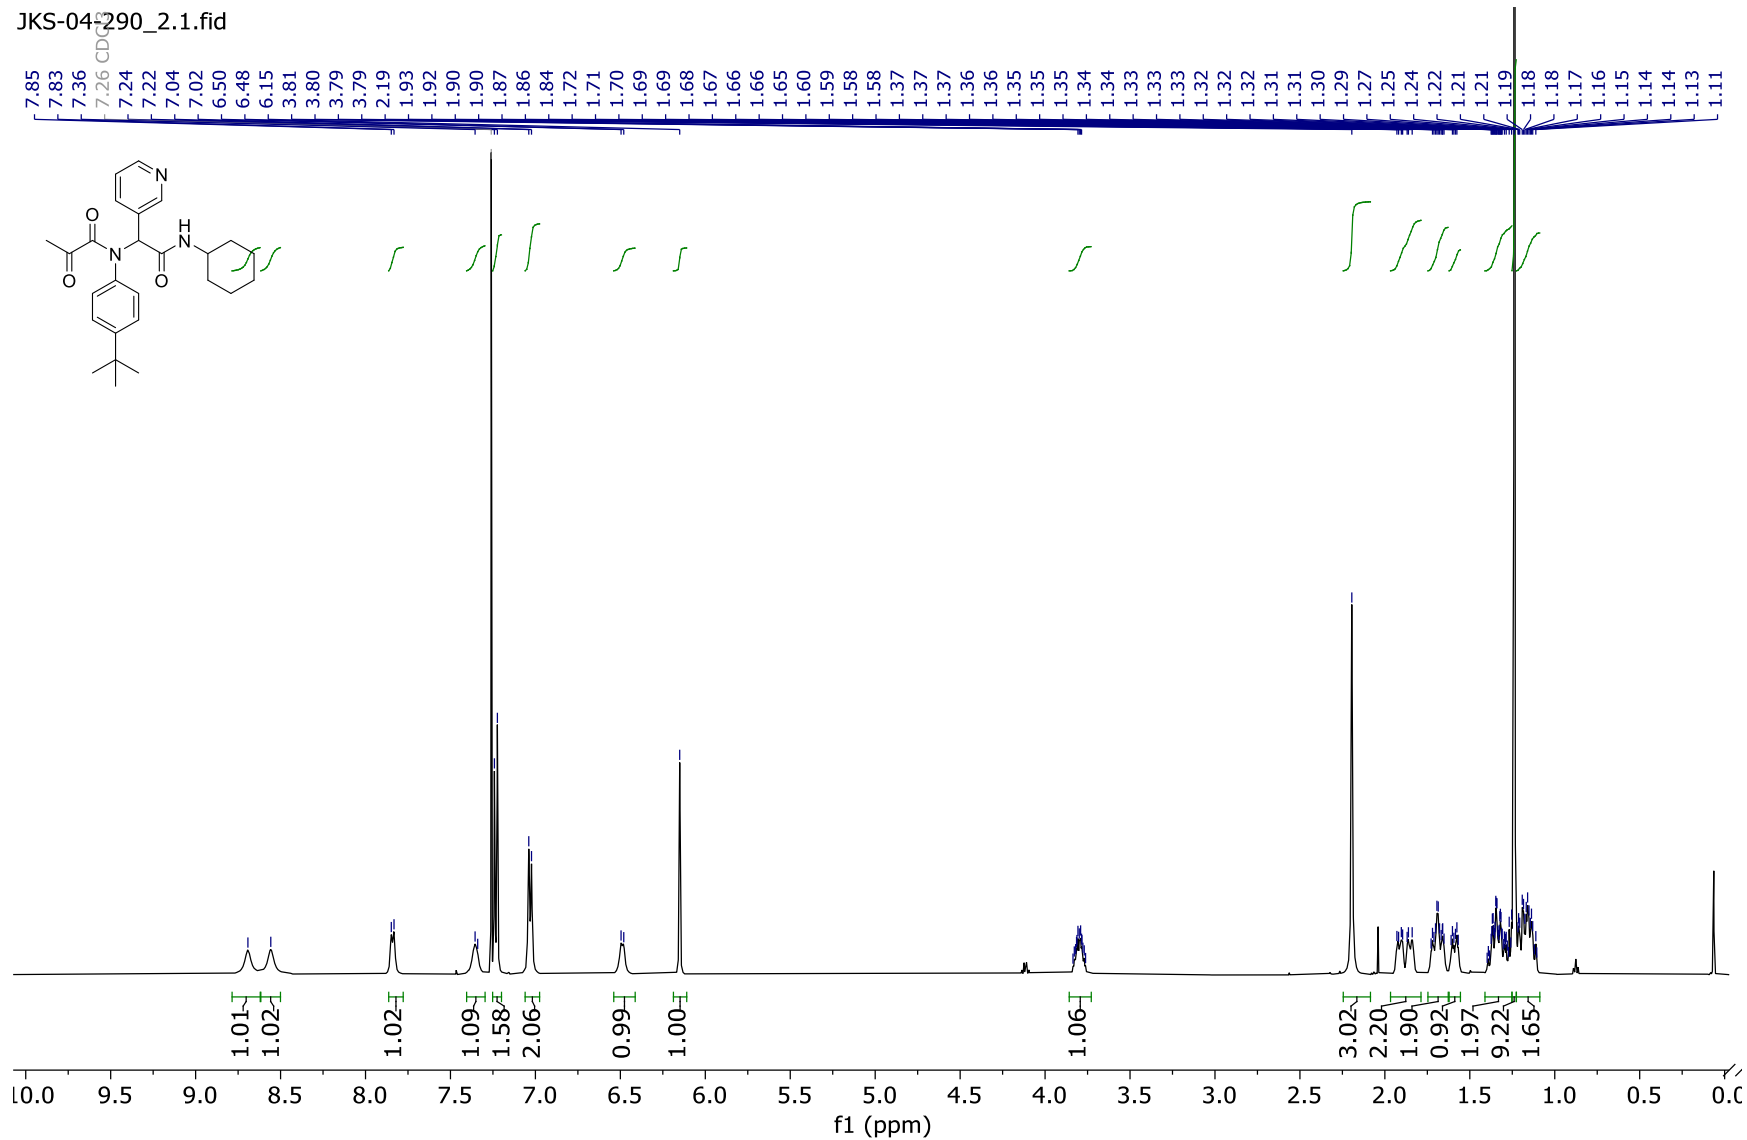

64. Compound **18a** <sup>13</sup>C NMR

JKS-04-290\_final.3.fid

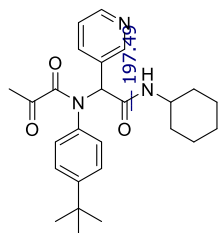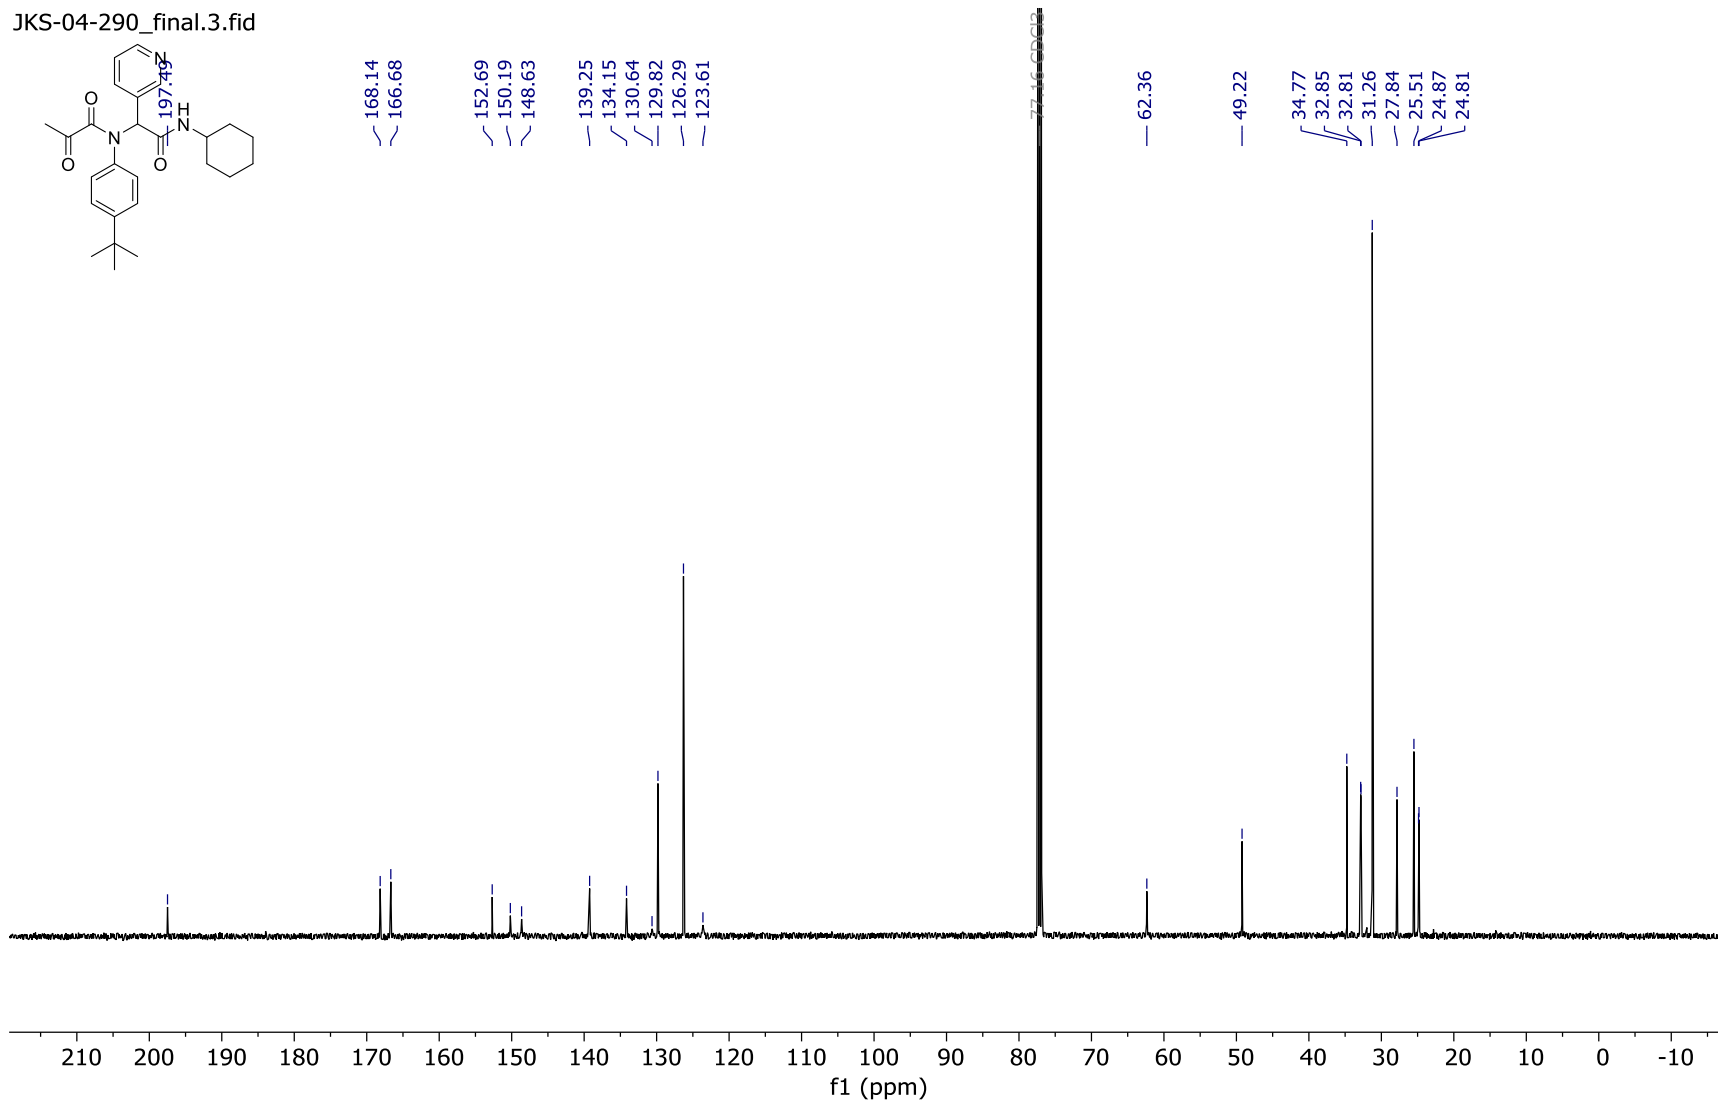

65. Compound **18b** <sup>1</sup>H NMR

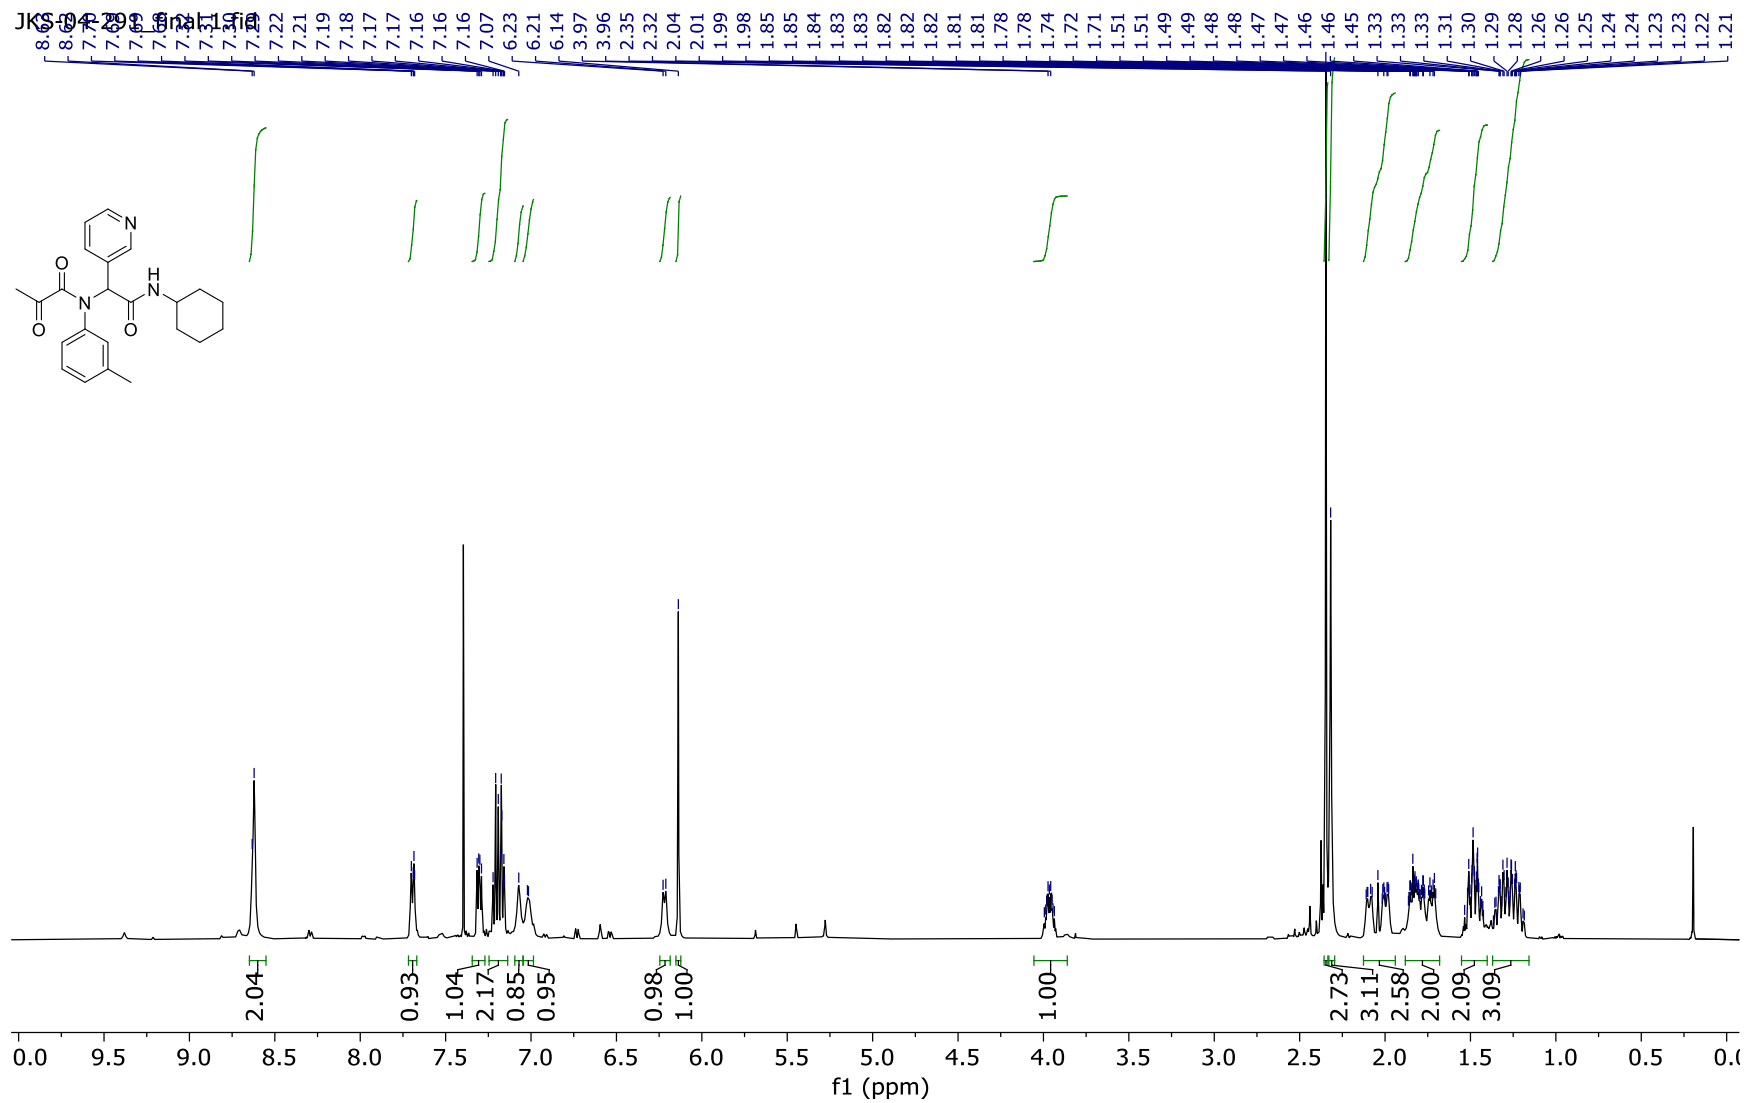

66. Compound **18b** <sup>13</sup>C NMR

JKS-04-291\_final.3.fid

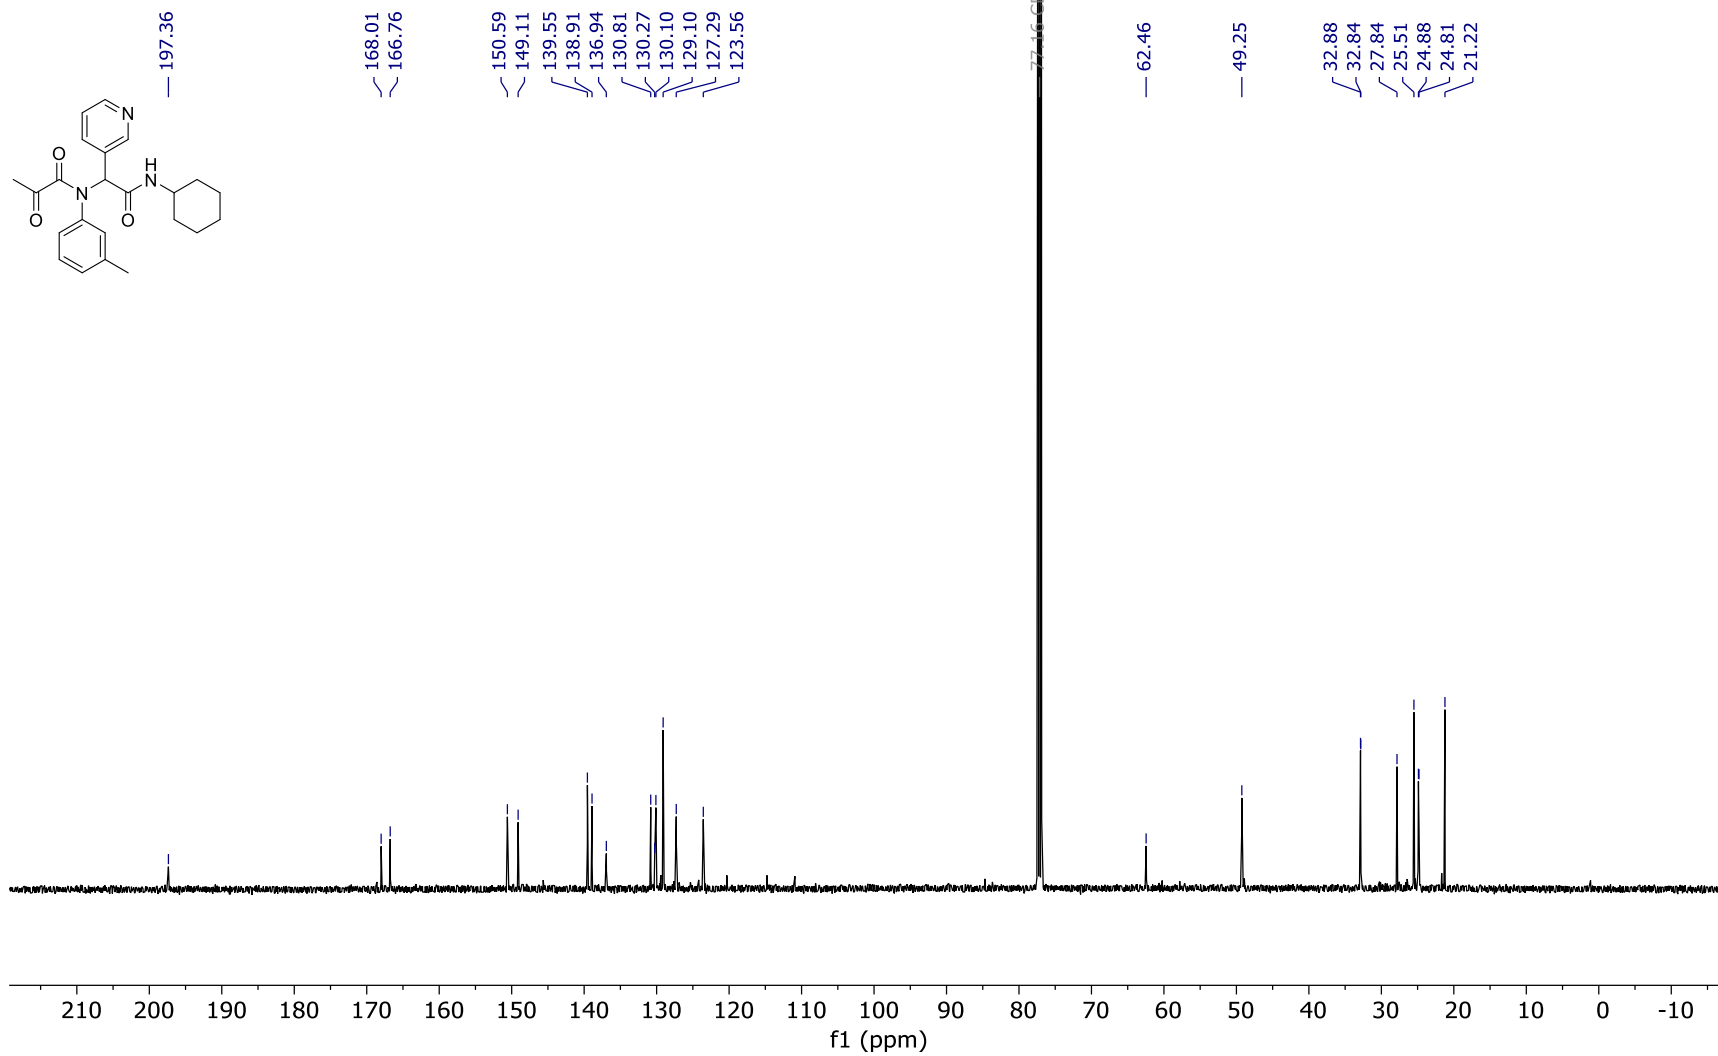



67. Compound **19a** <sup>1</sup>H NMR

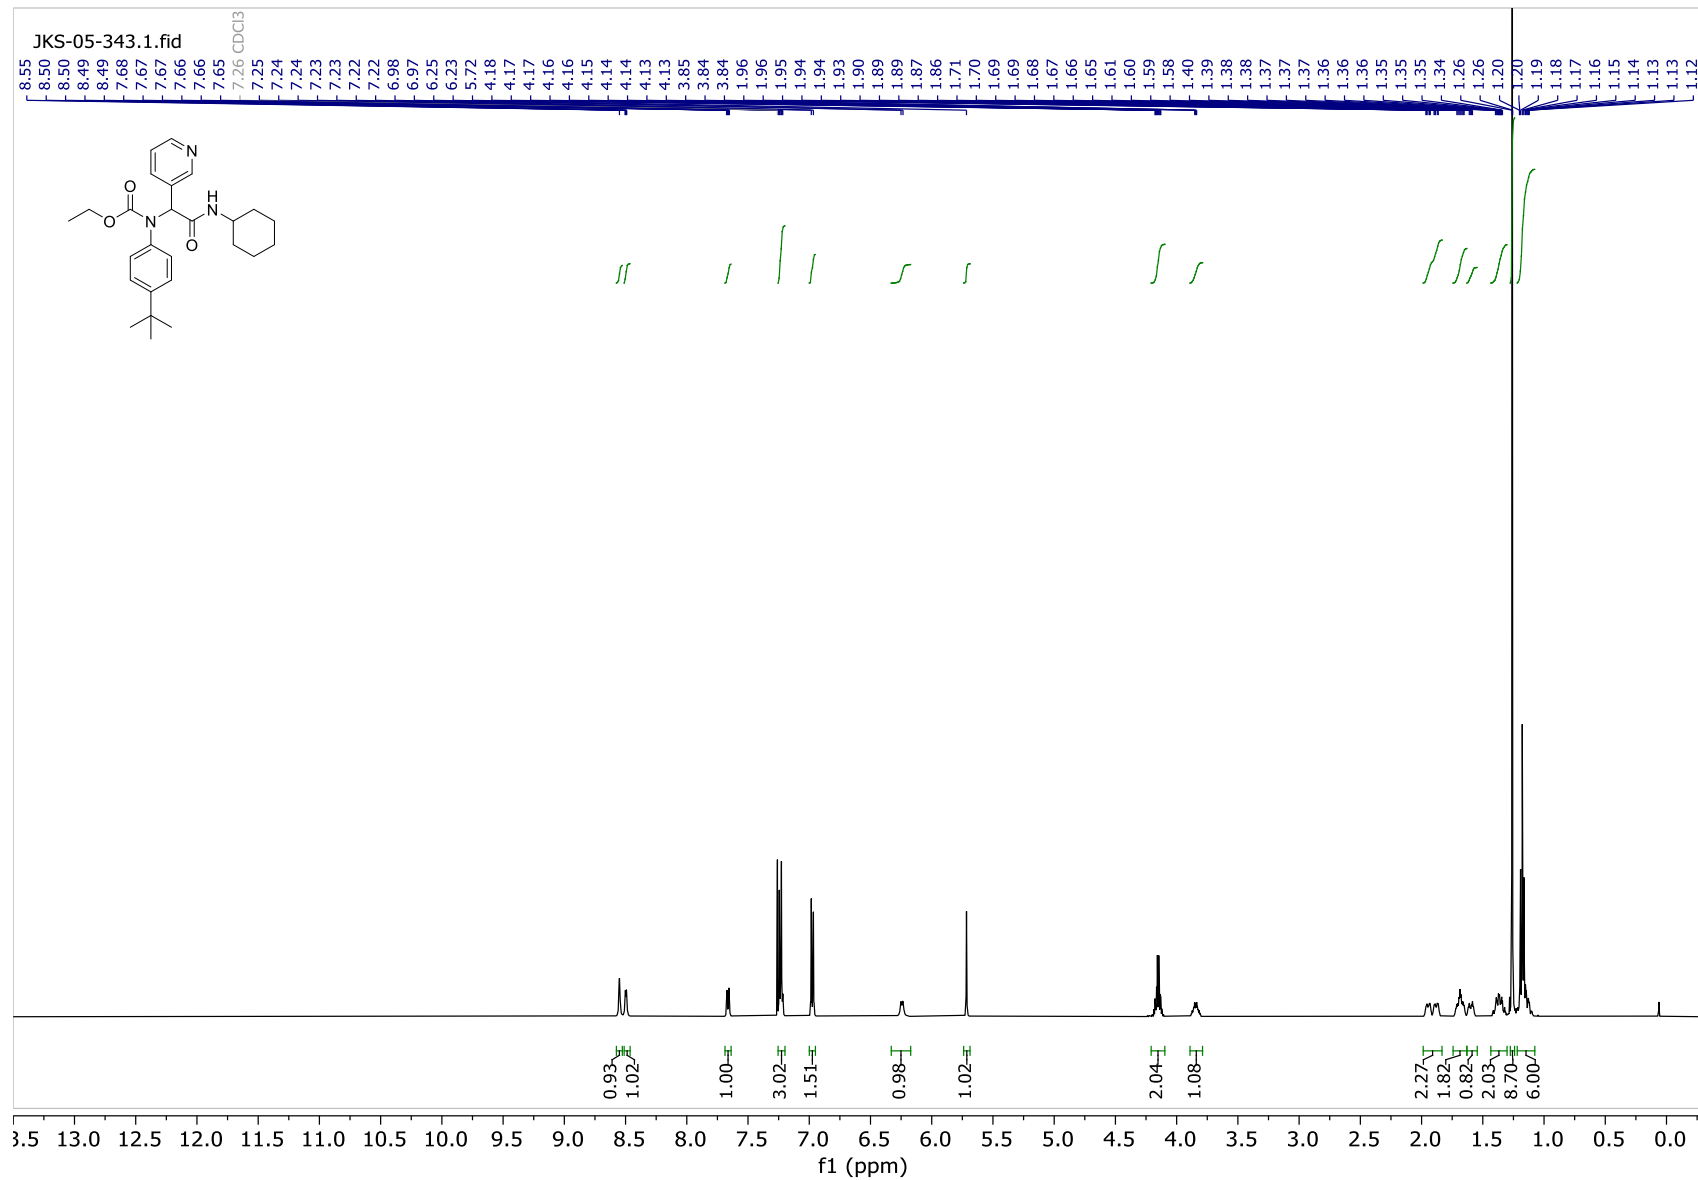

68. Compound **19a** <sup>13</sup>C NMR

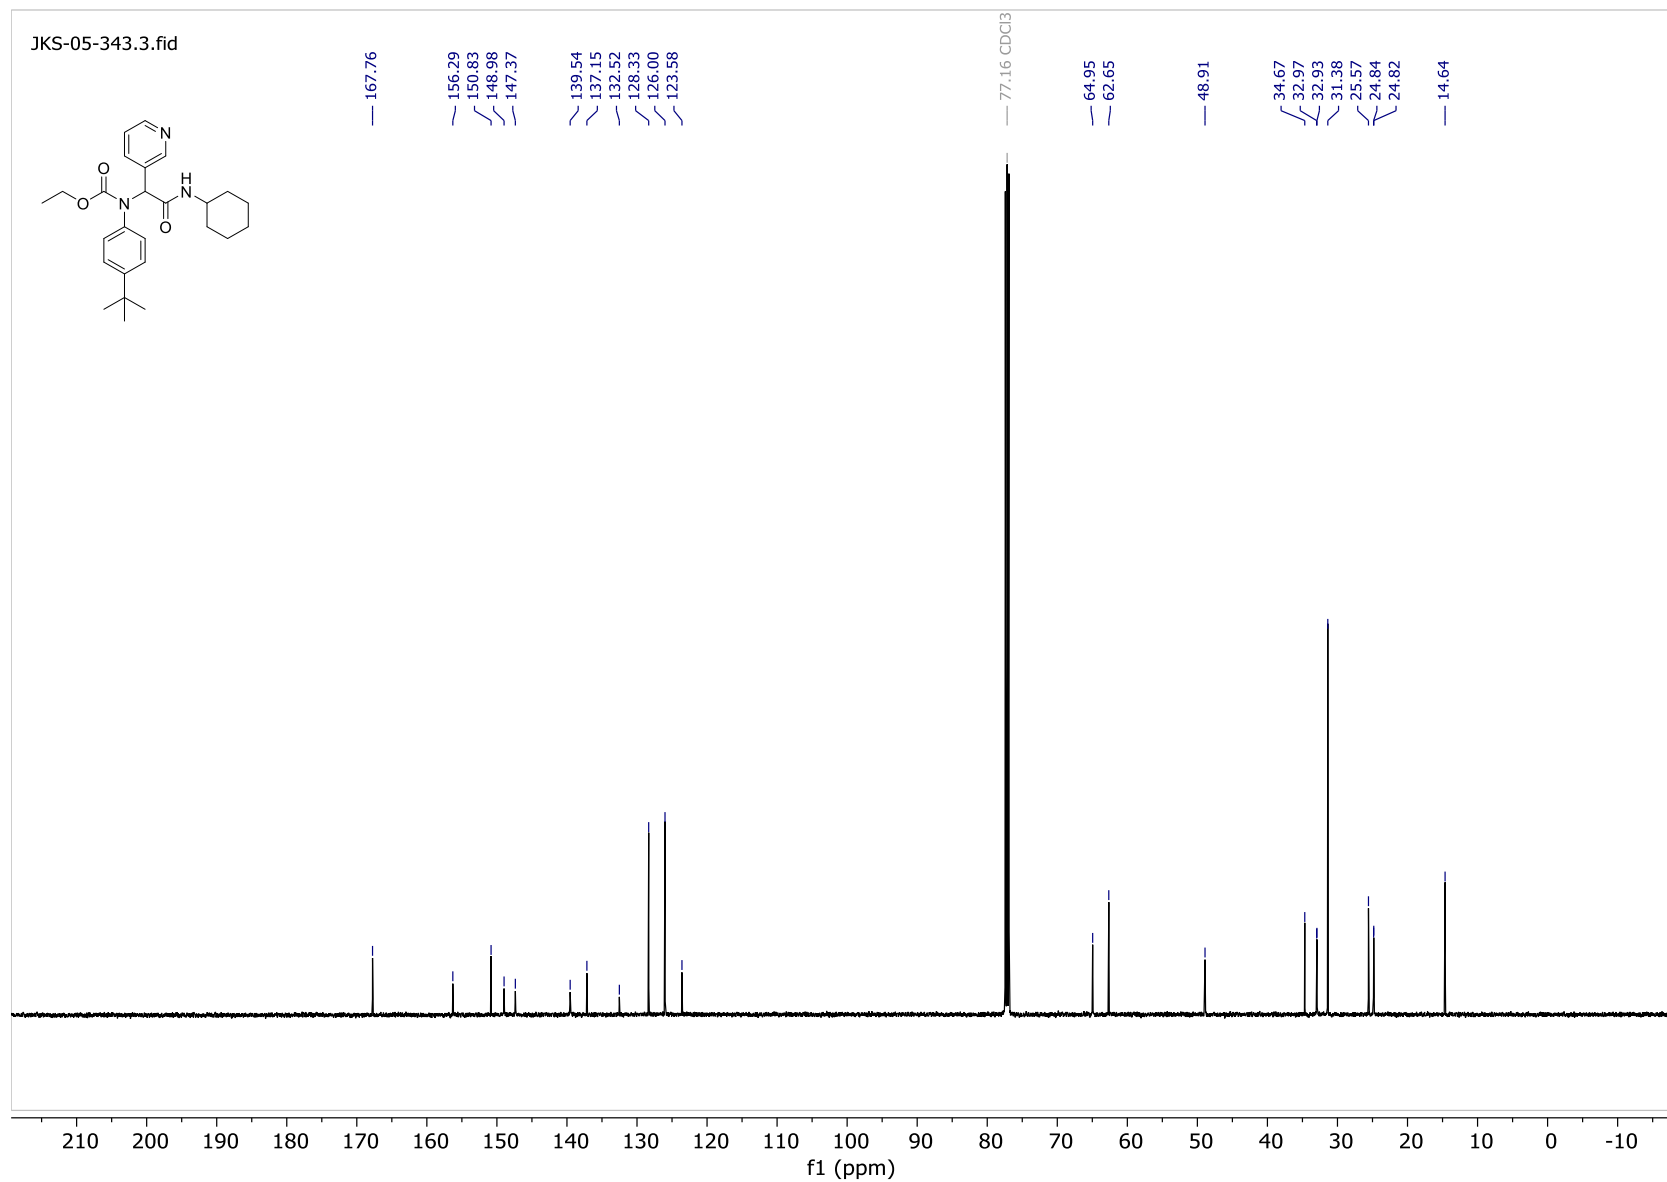

69. Compound 20a <sup>1</sup>H NMR

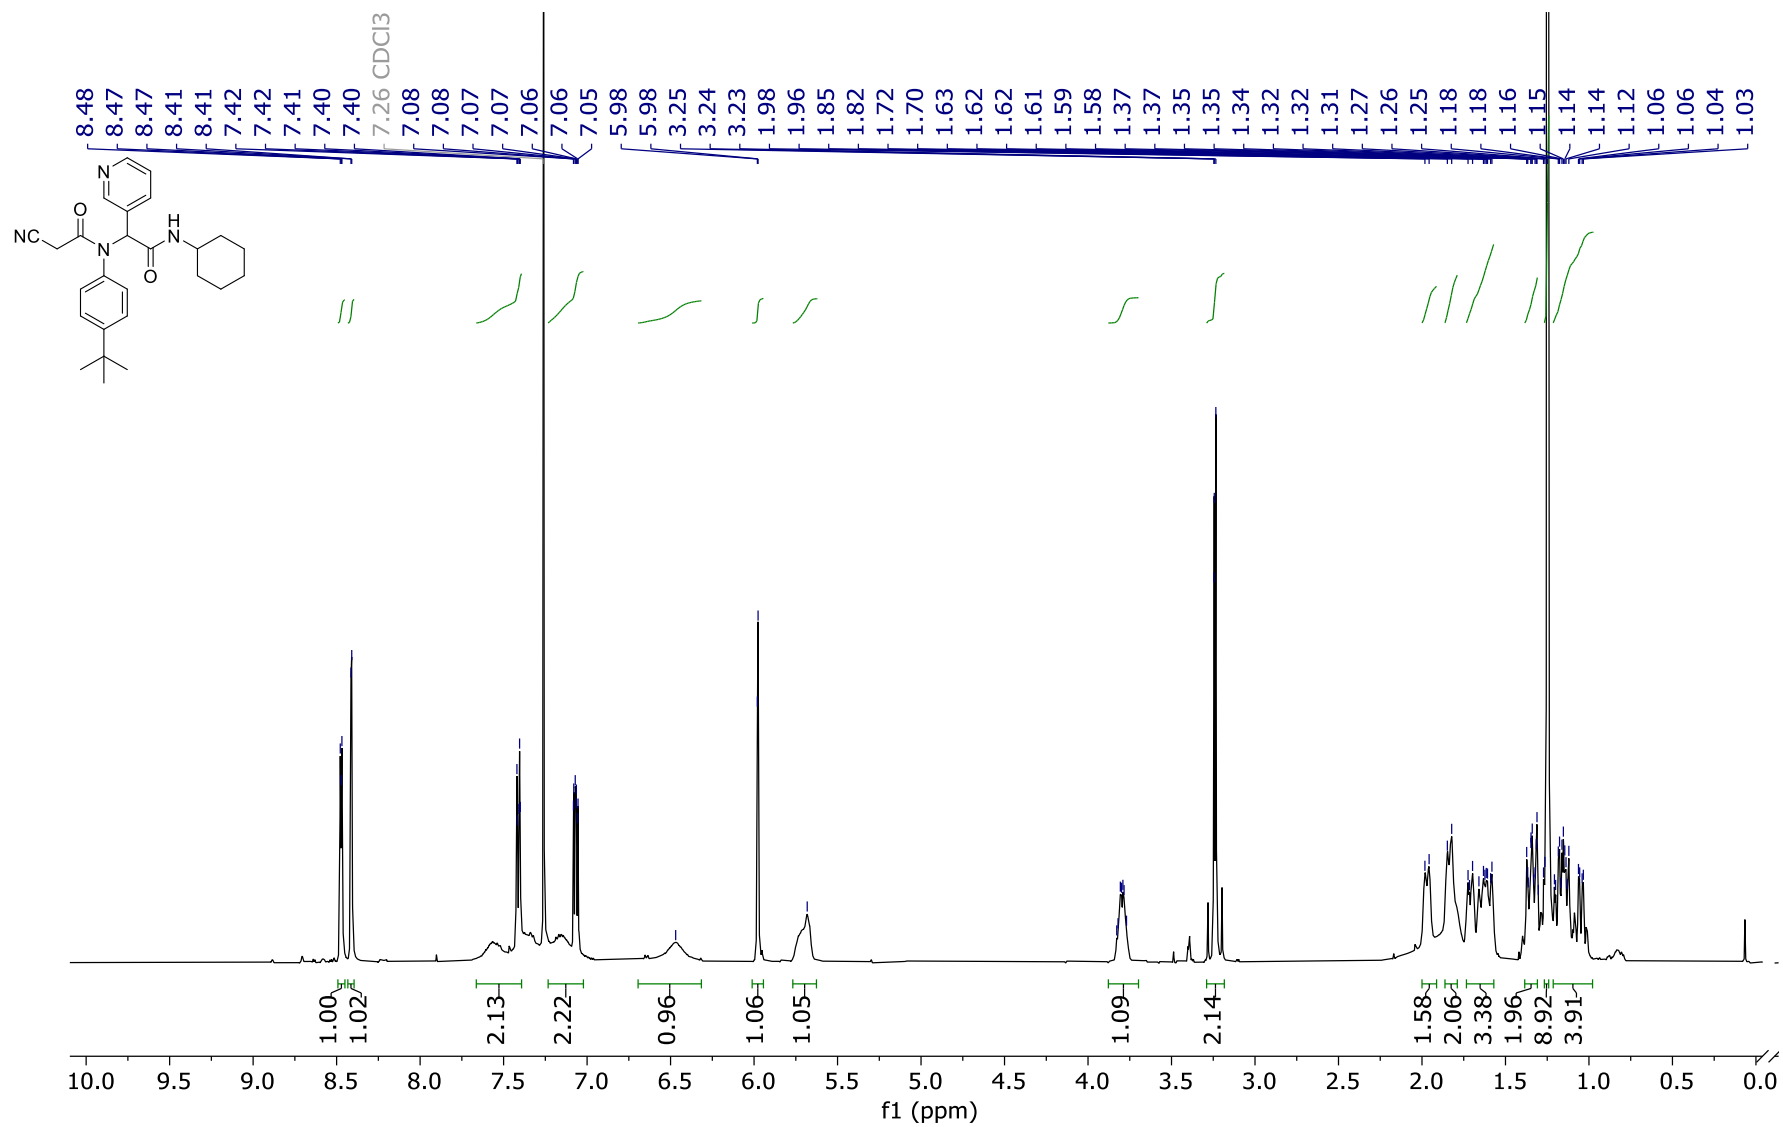

70. Compound **20a** <sup>13</sup>C NMR

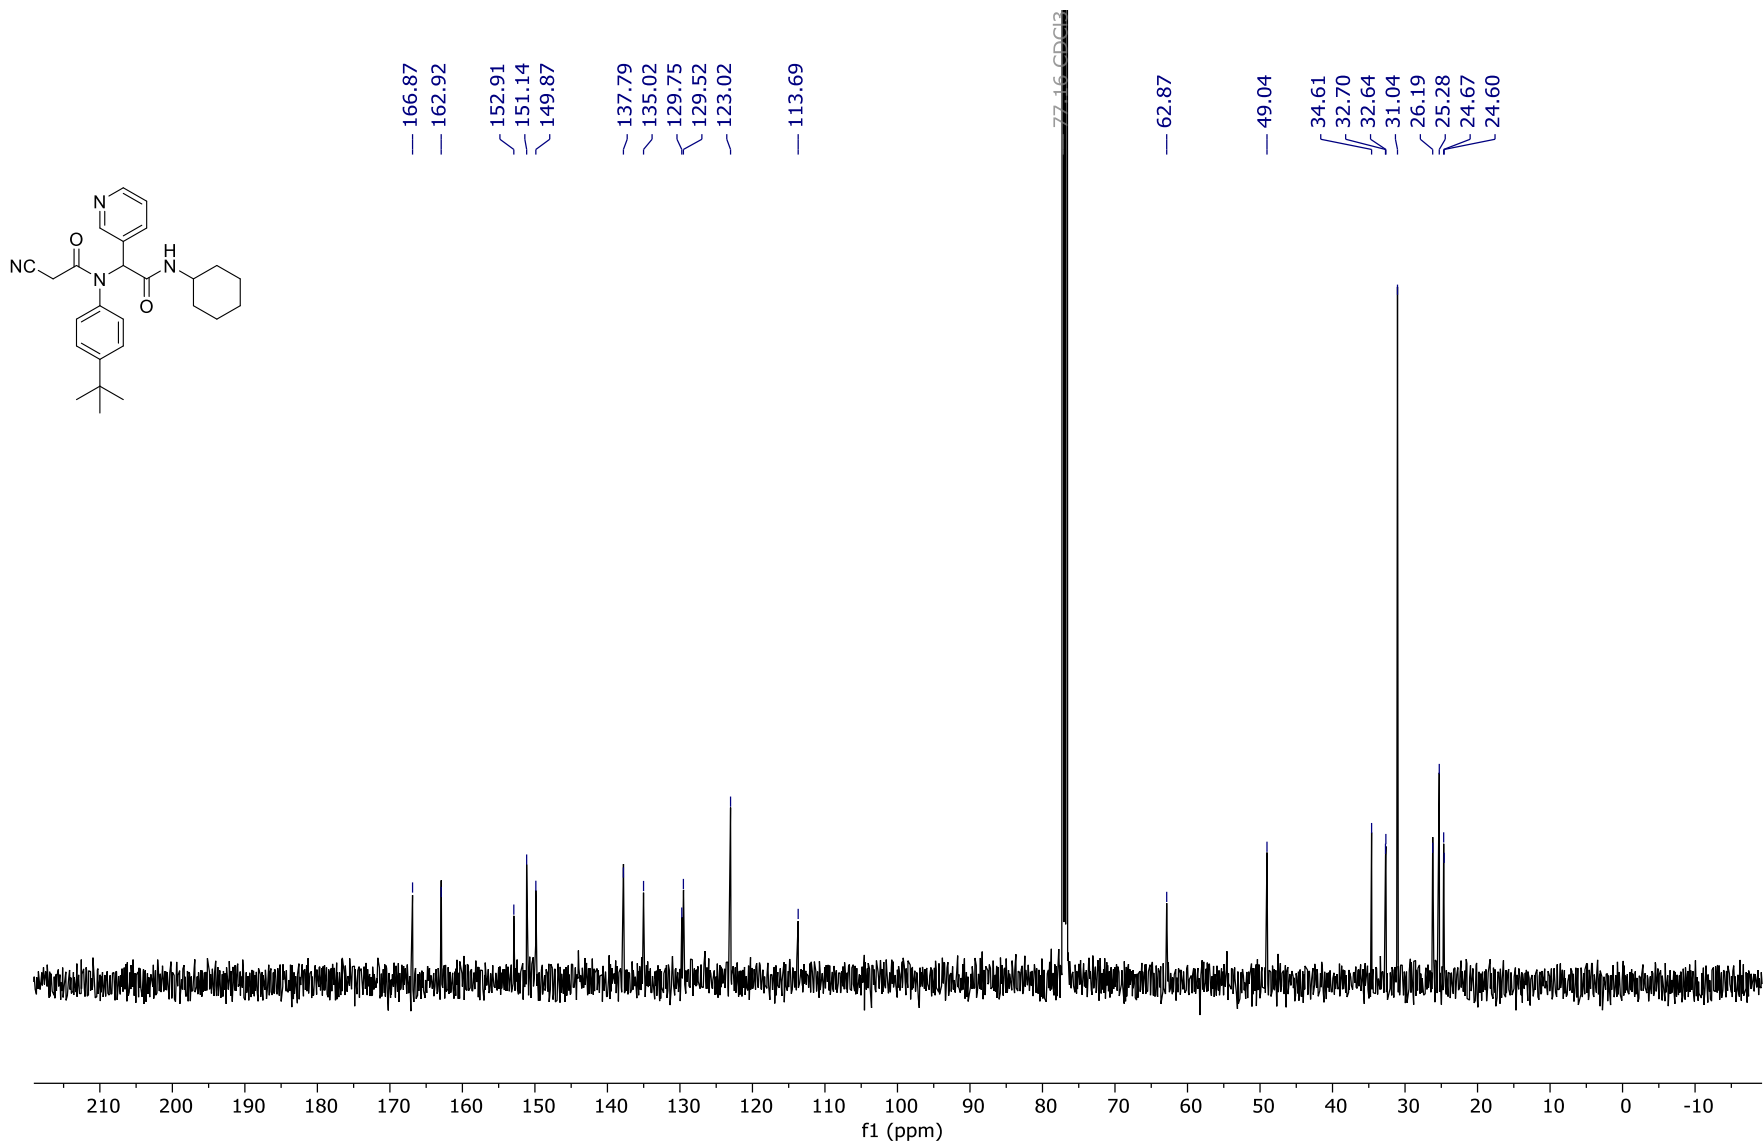

71. Compound 21a <sup>1</sup>H NMR

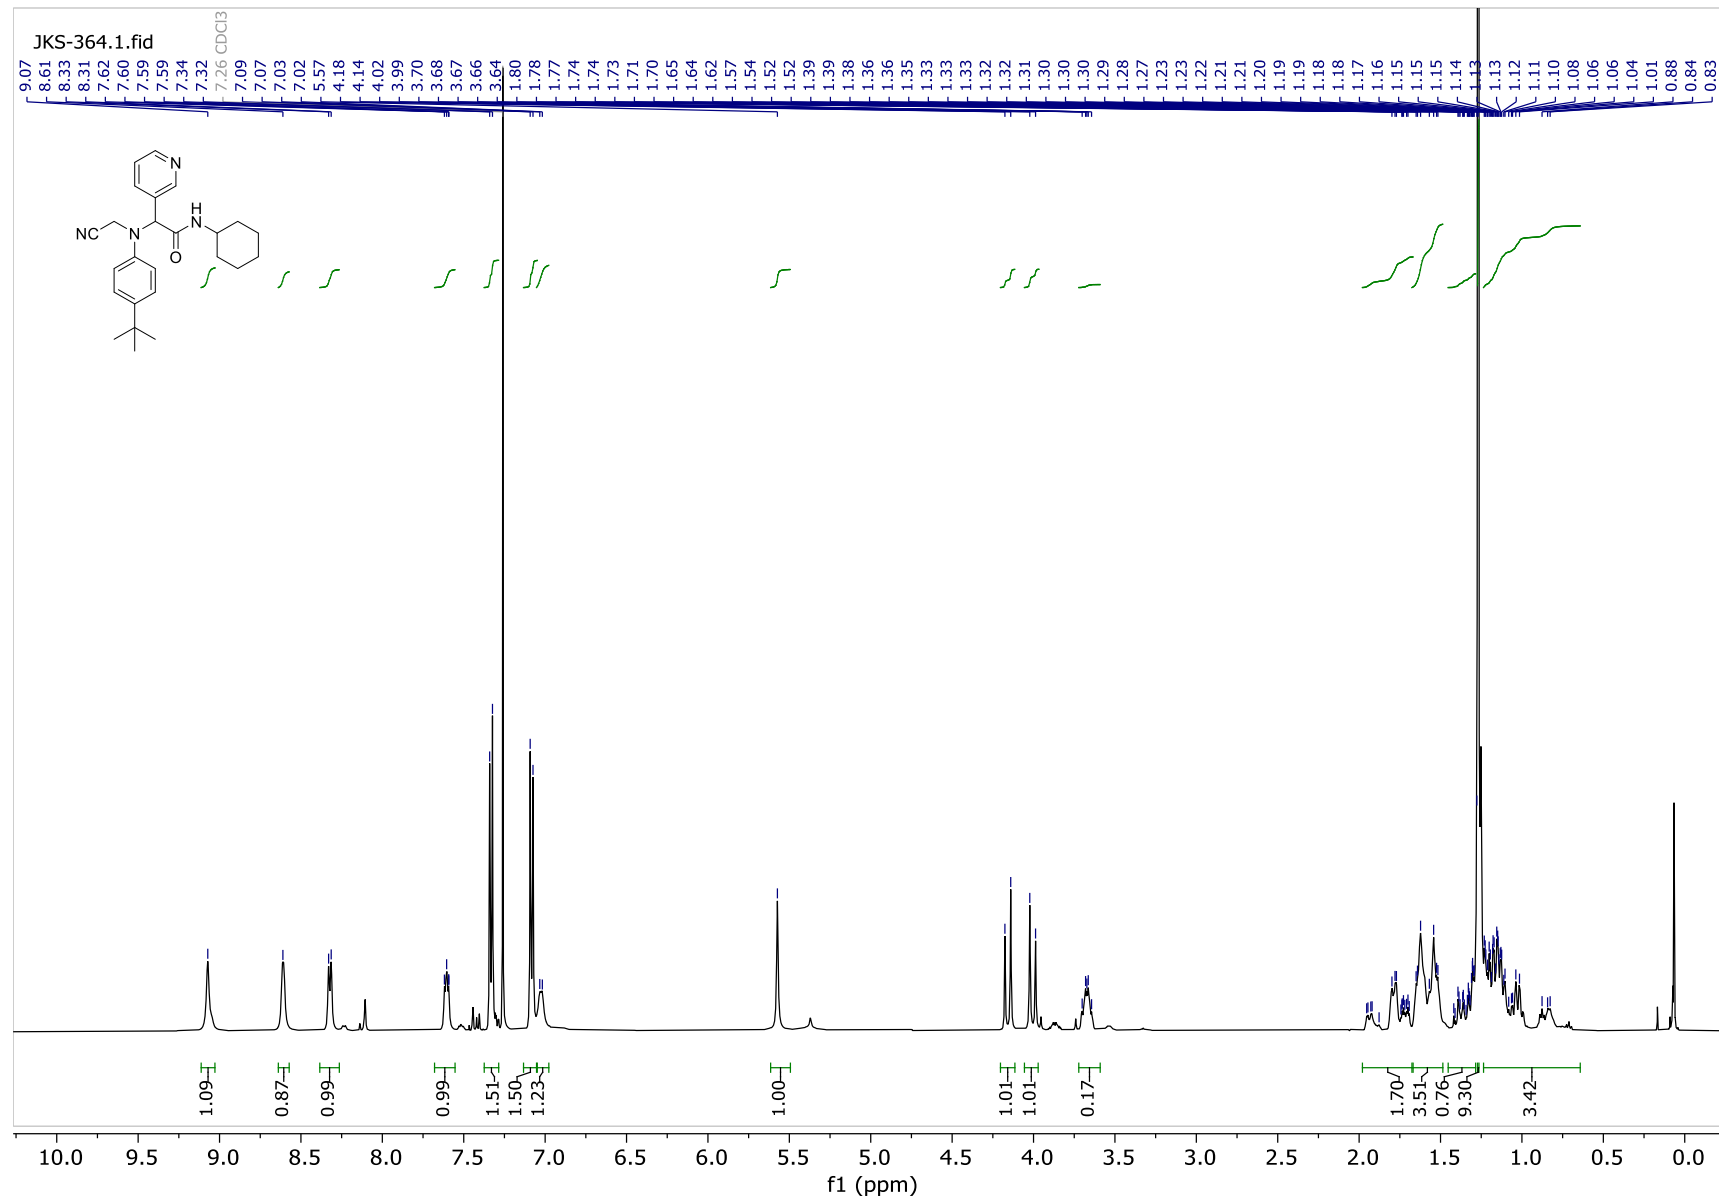

72. Compound **21a** <sup>13</sup>C NMR

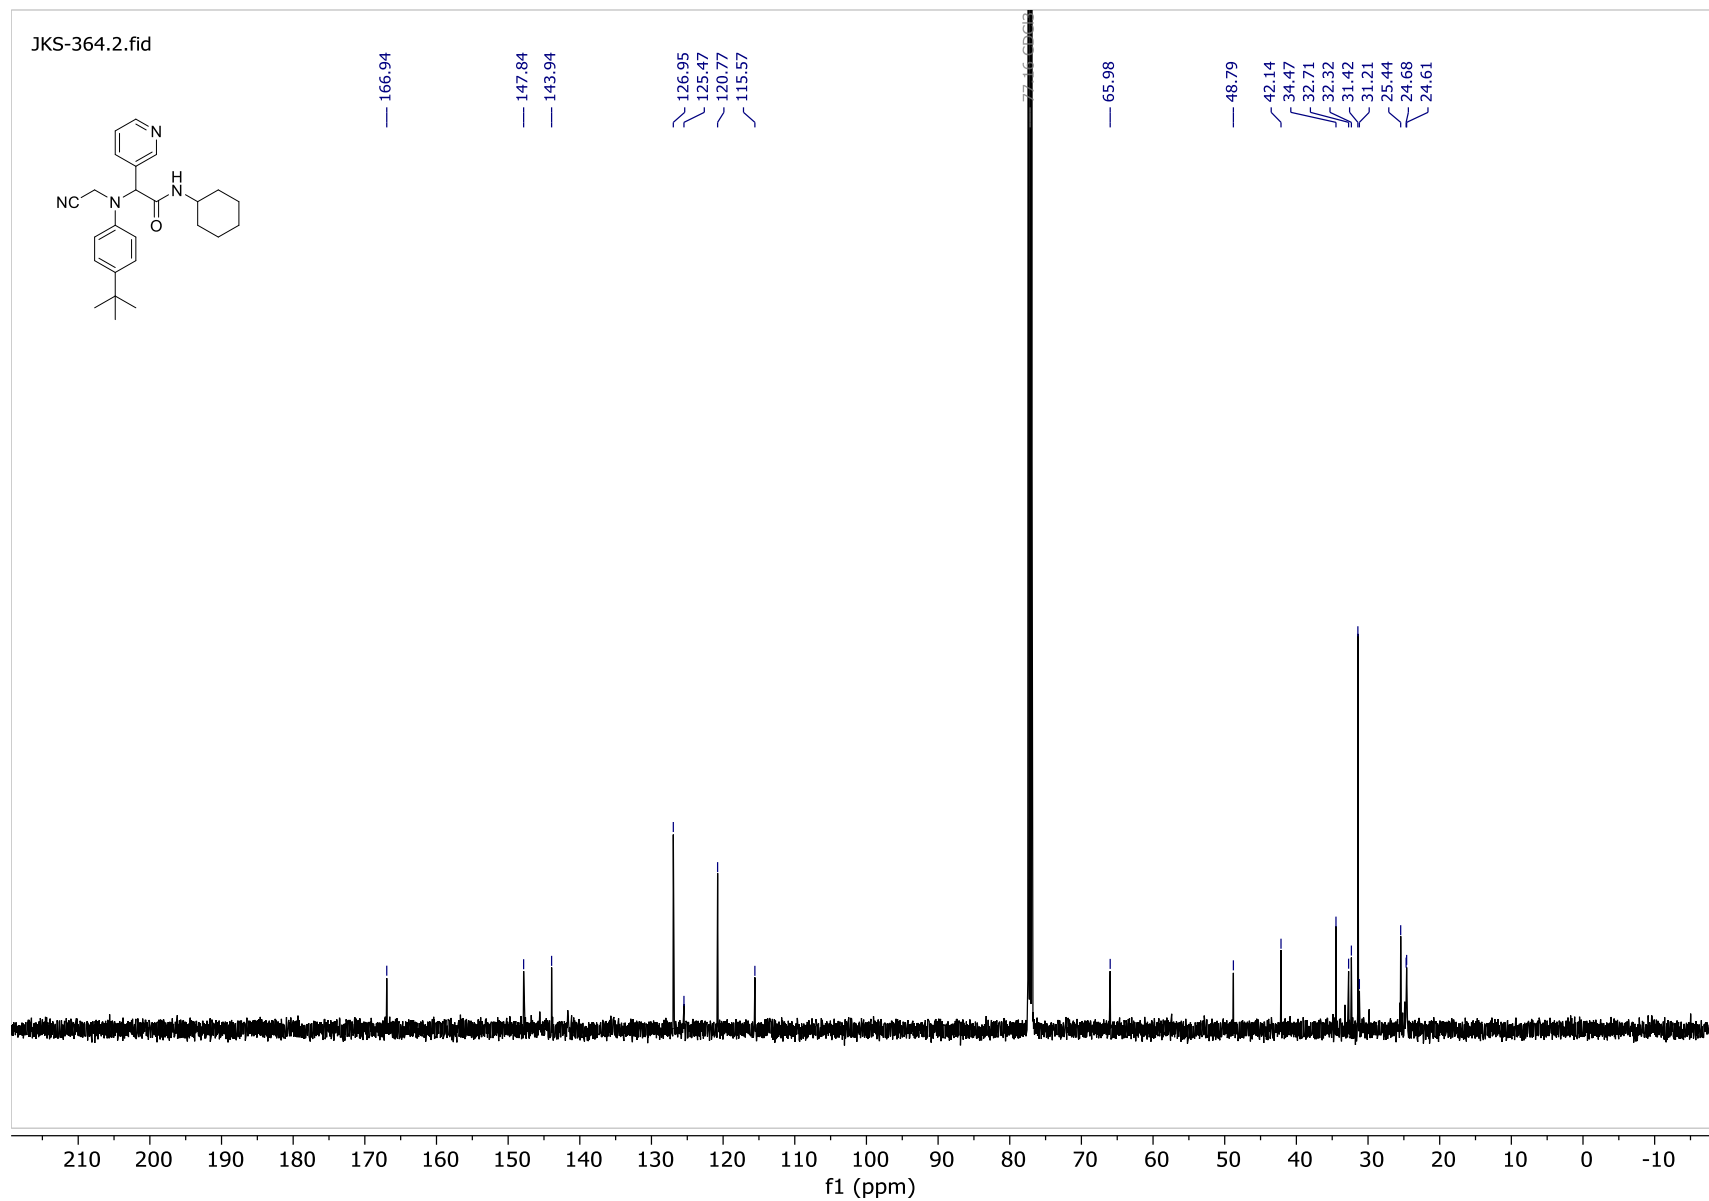

73. Compound **22a** <sup>1</sup>H NMR

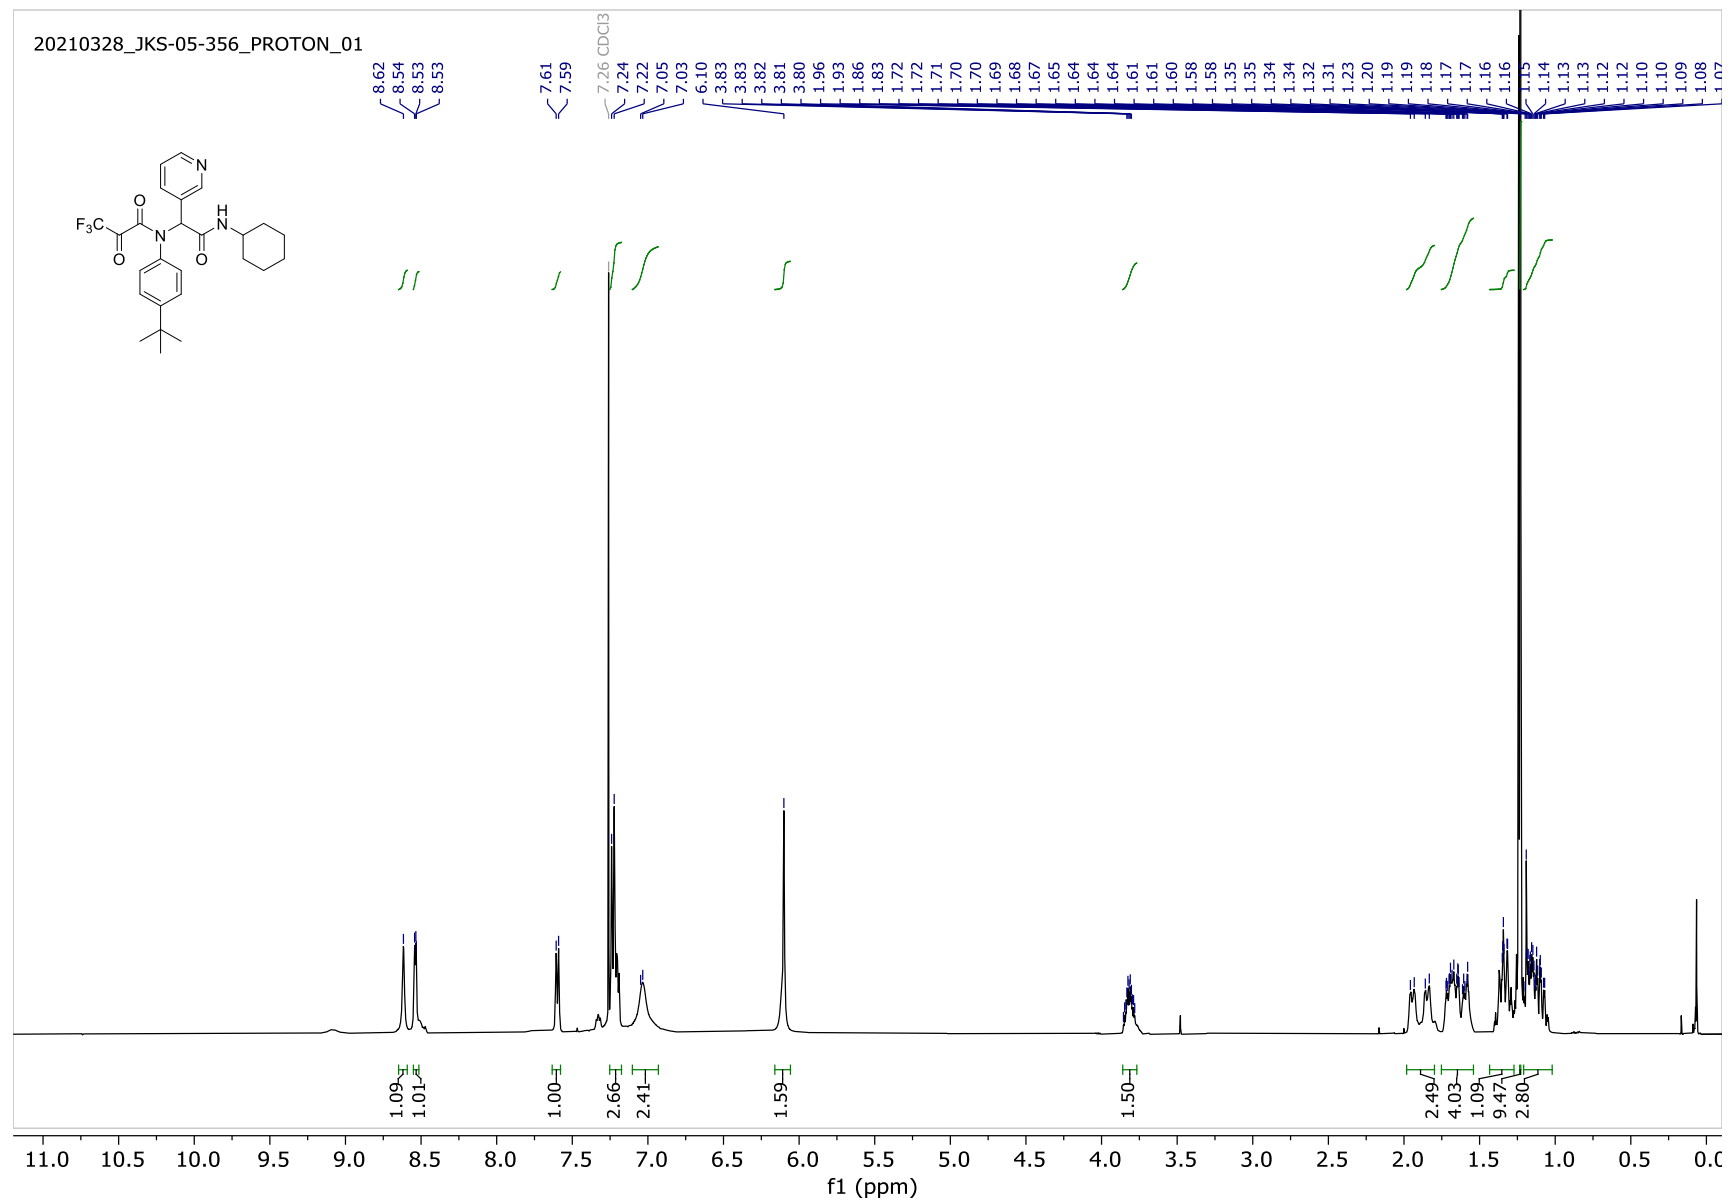

74. Compound **22a** <sup>13</sup>C NMR

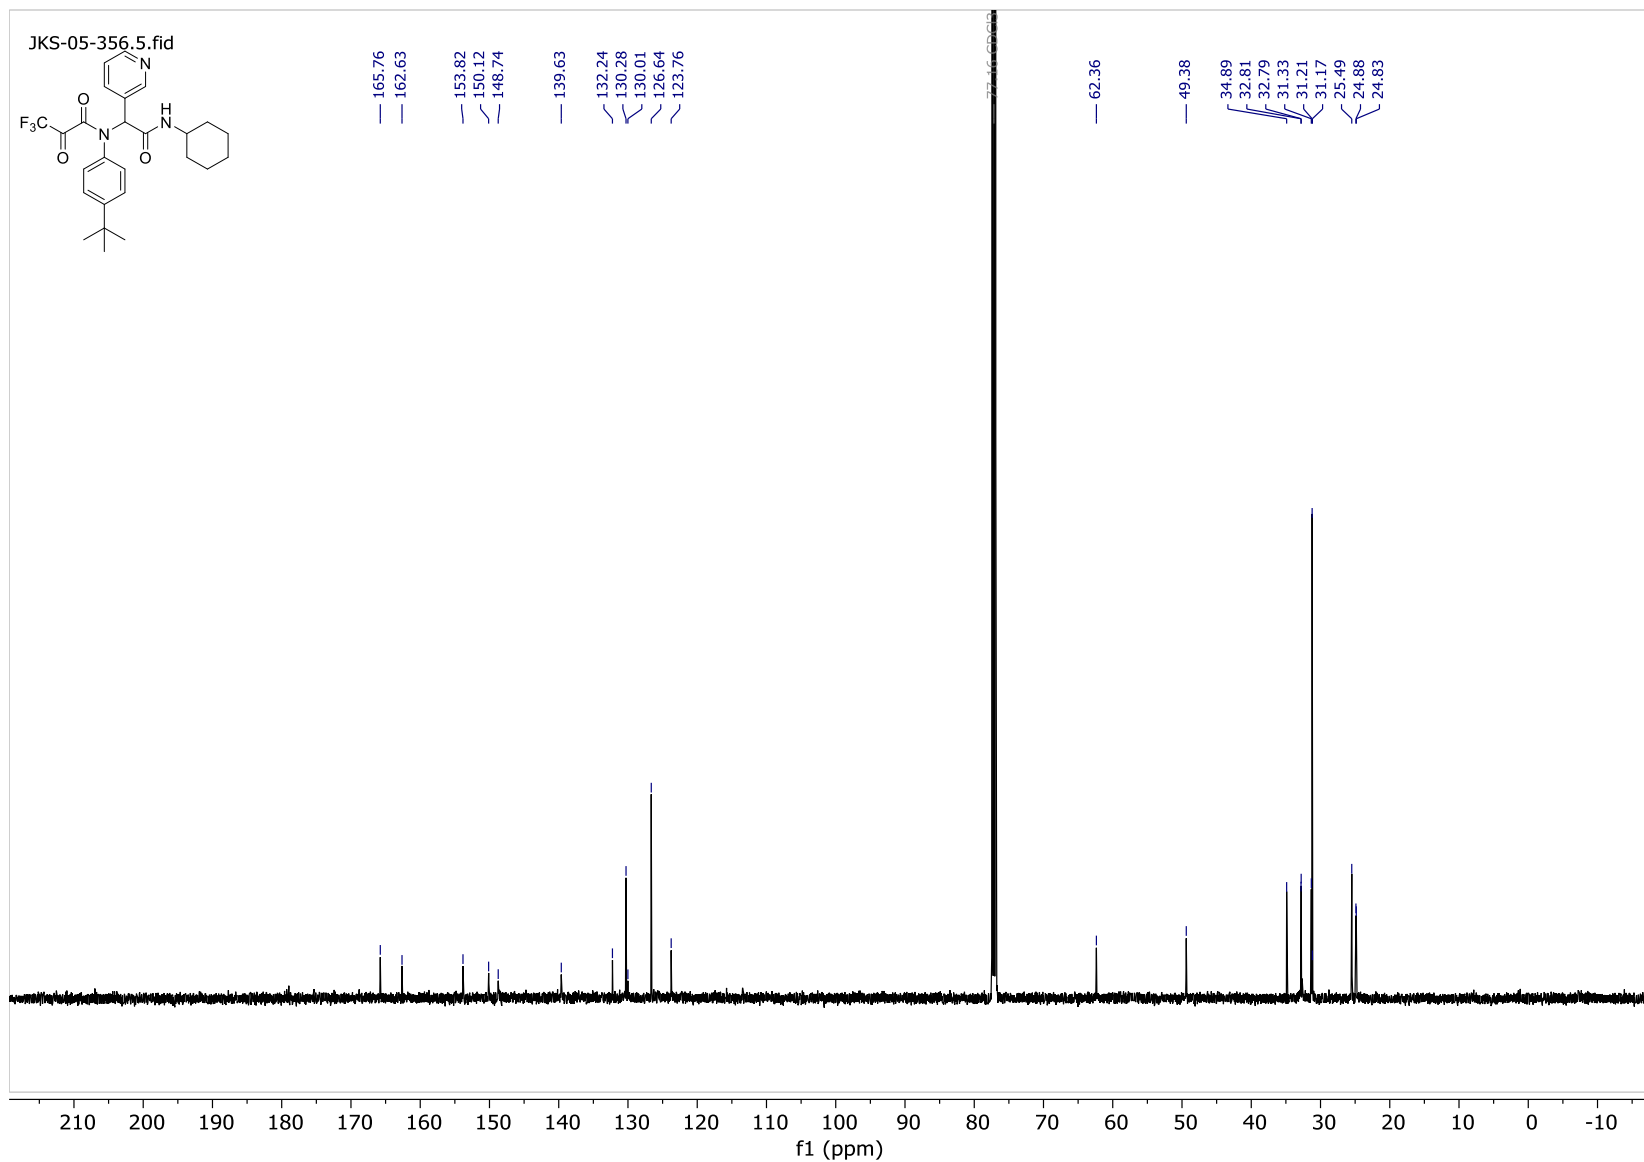



75. Compound **22a** <sup>19</sup>F NMR

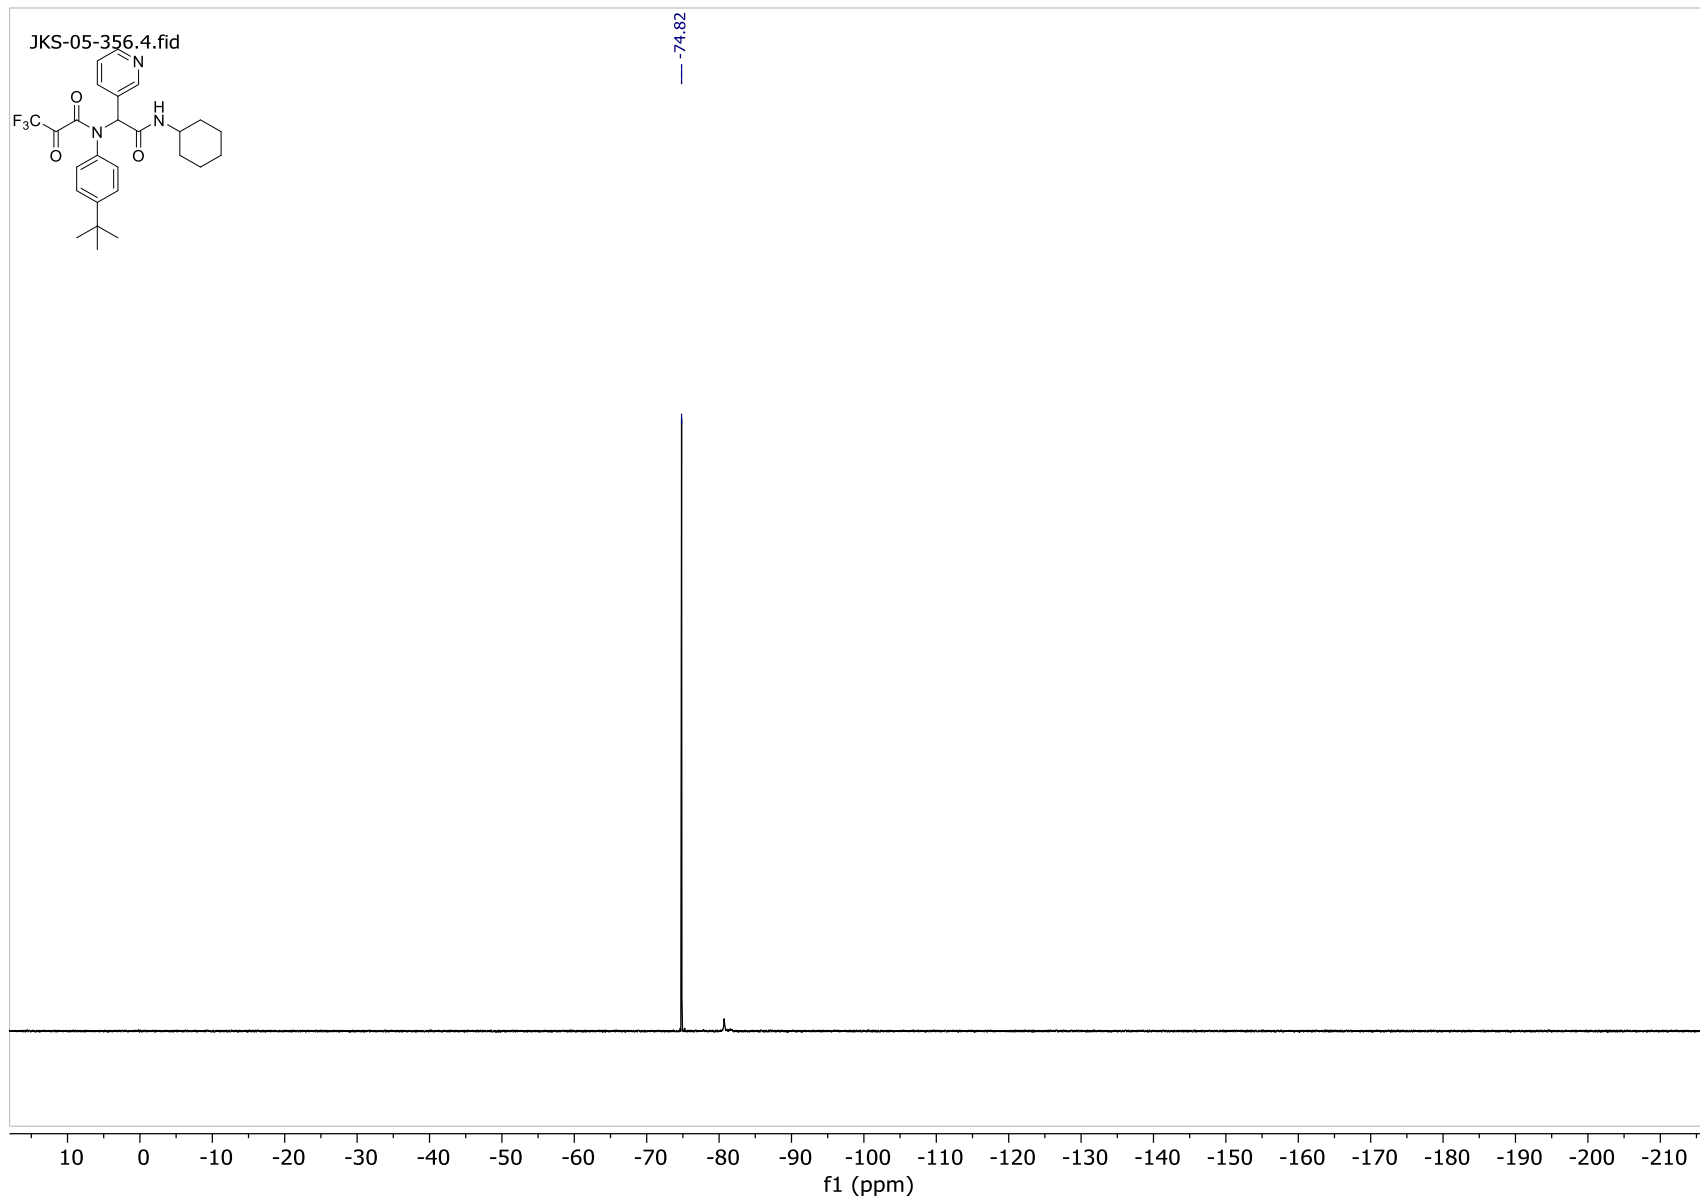

76. Compound **23a** <sup>1</sup>H NMR

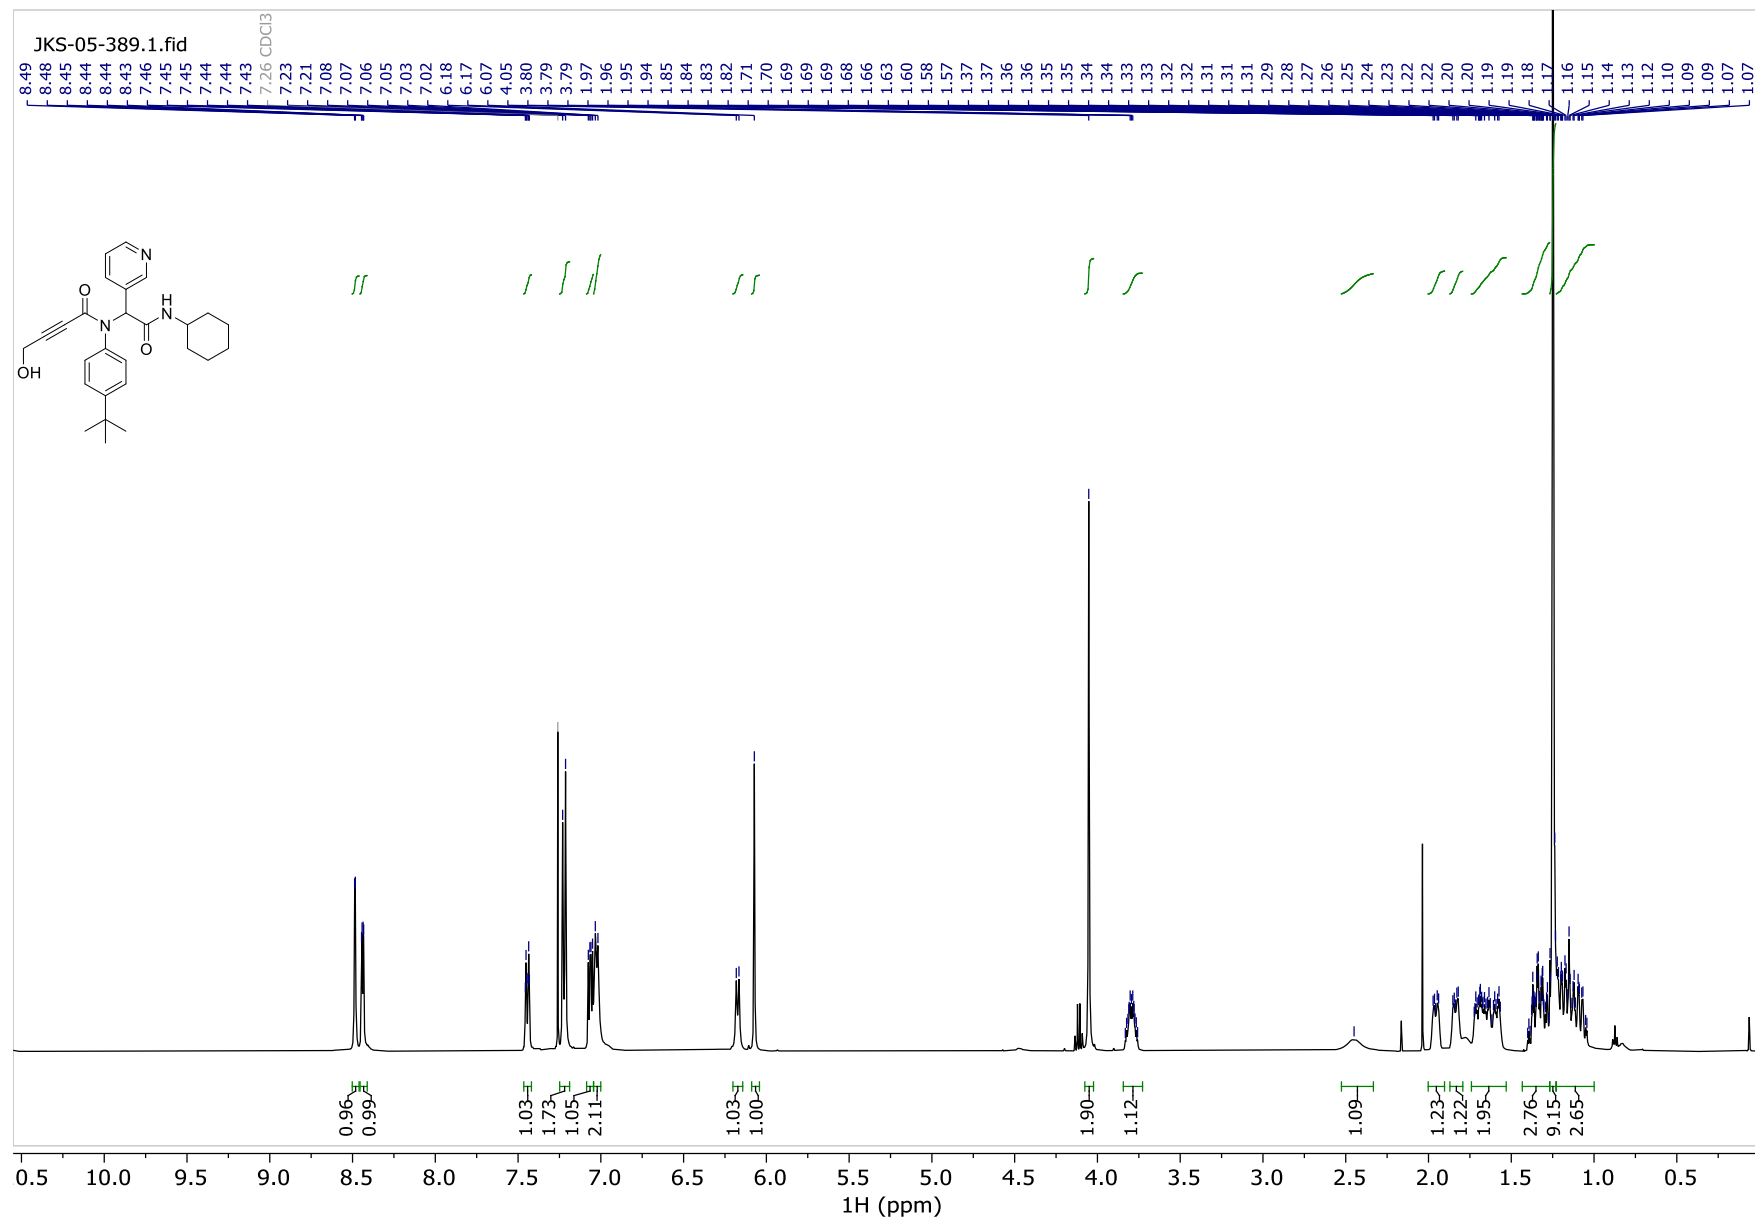

77. Compound **23a** <sup>13</sup>C NMR

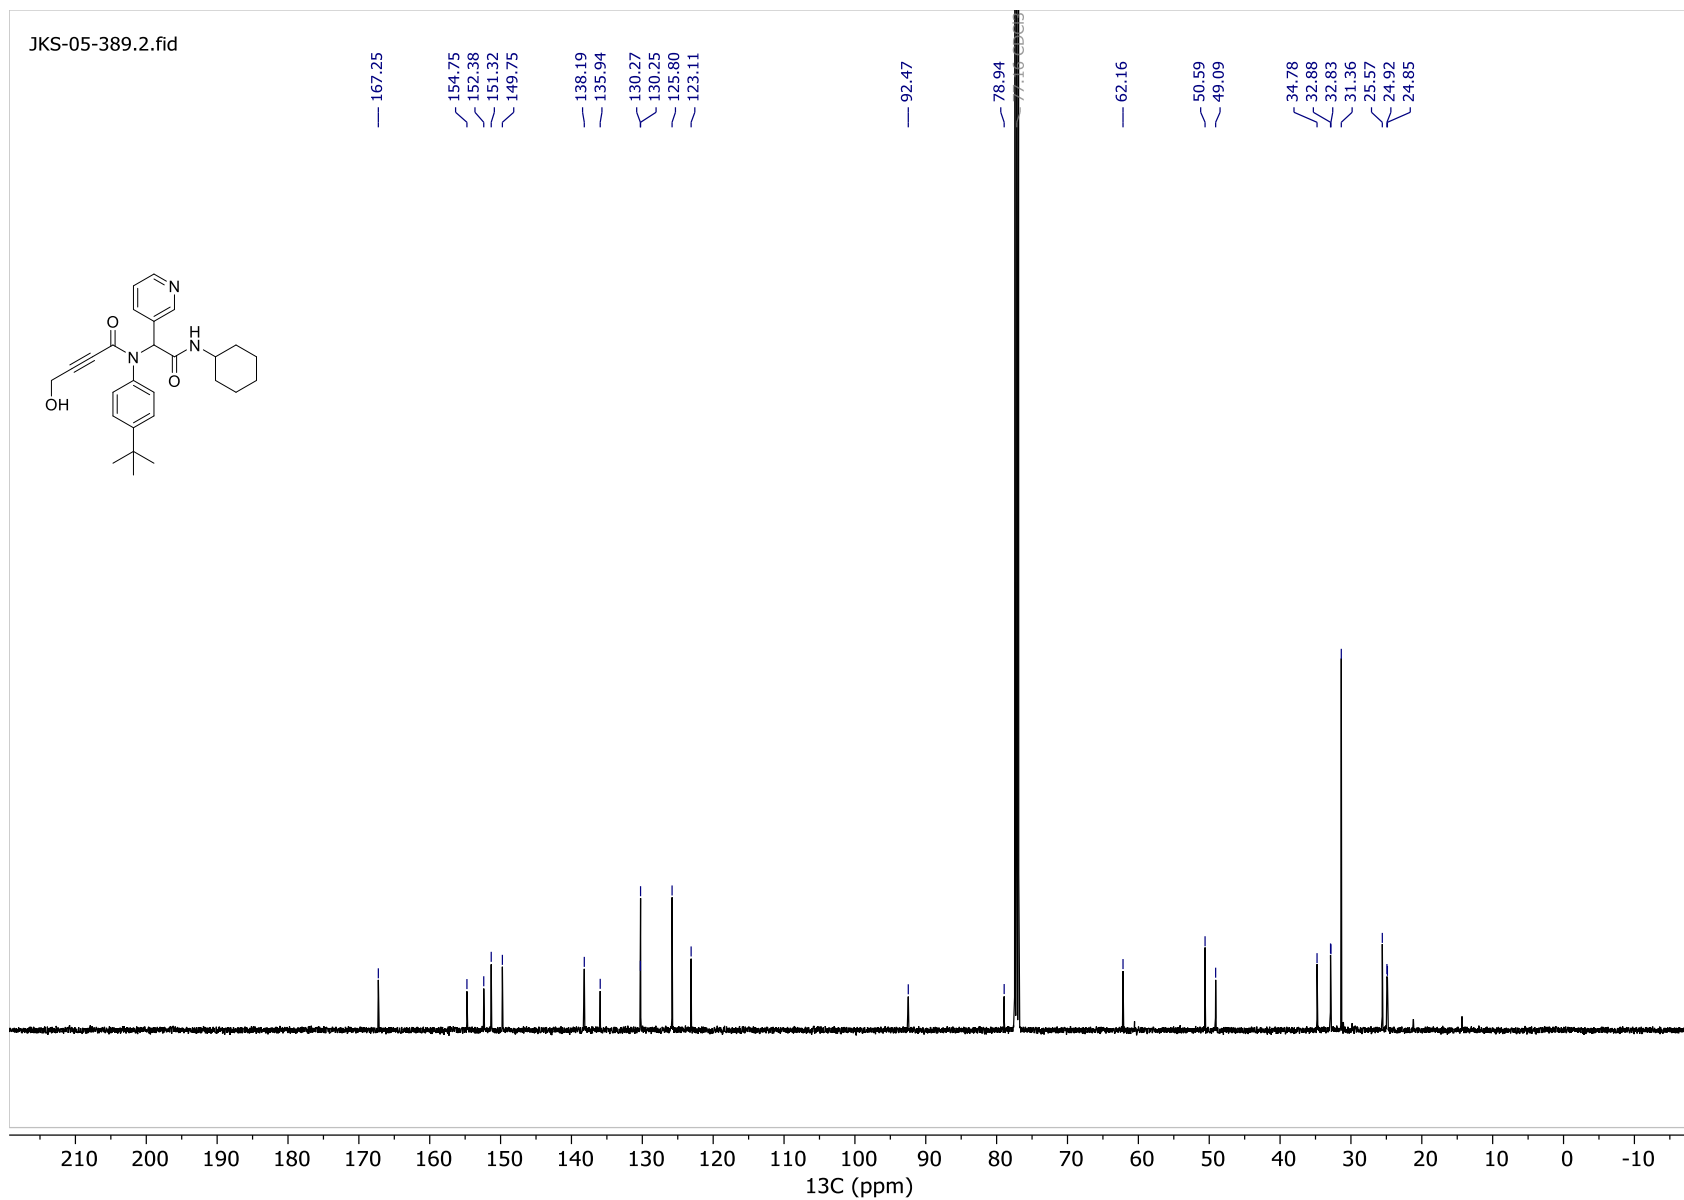

78. Compound **24a** <sup>1</sup>H NMR

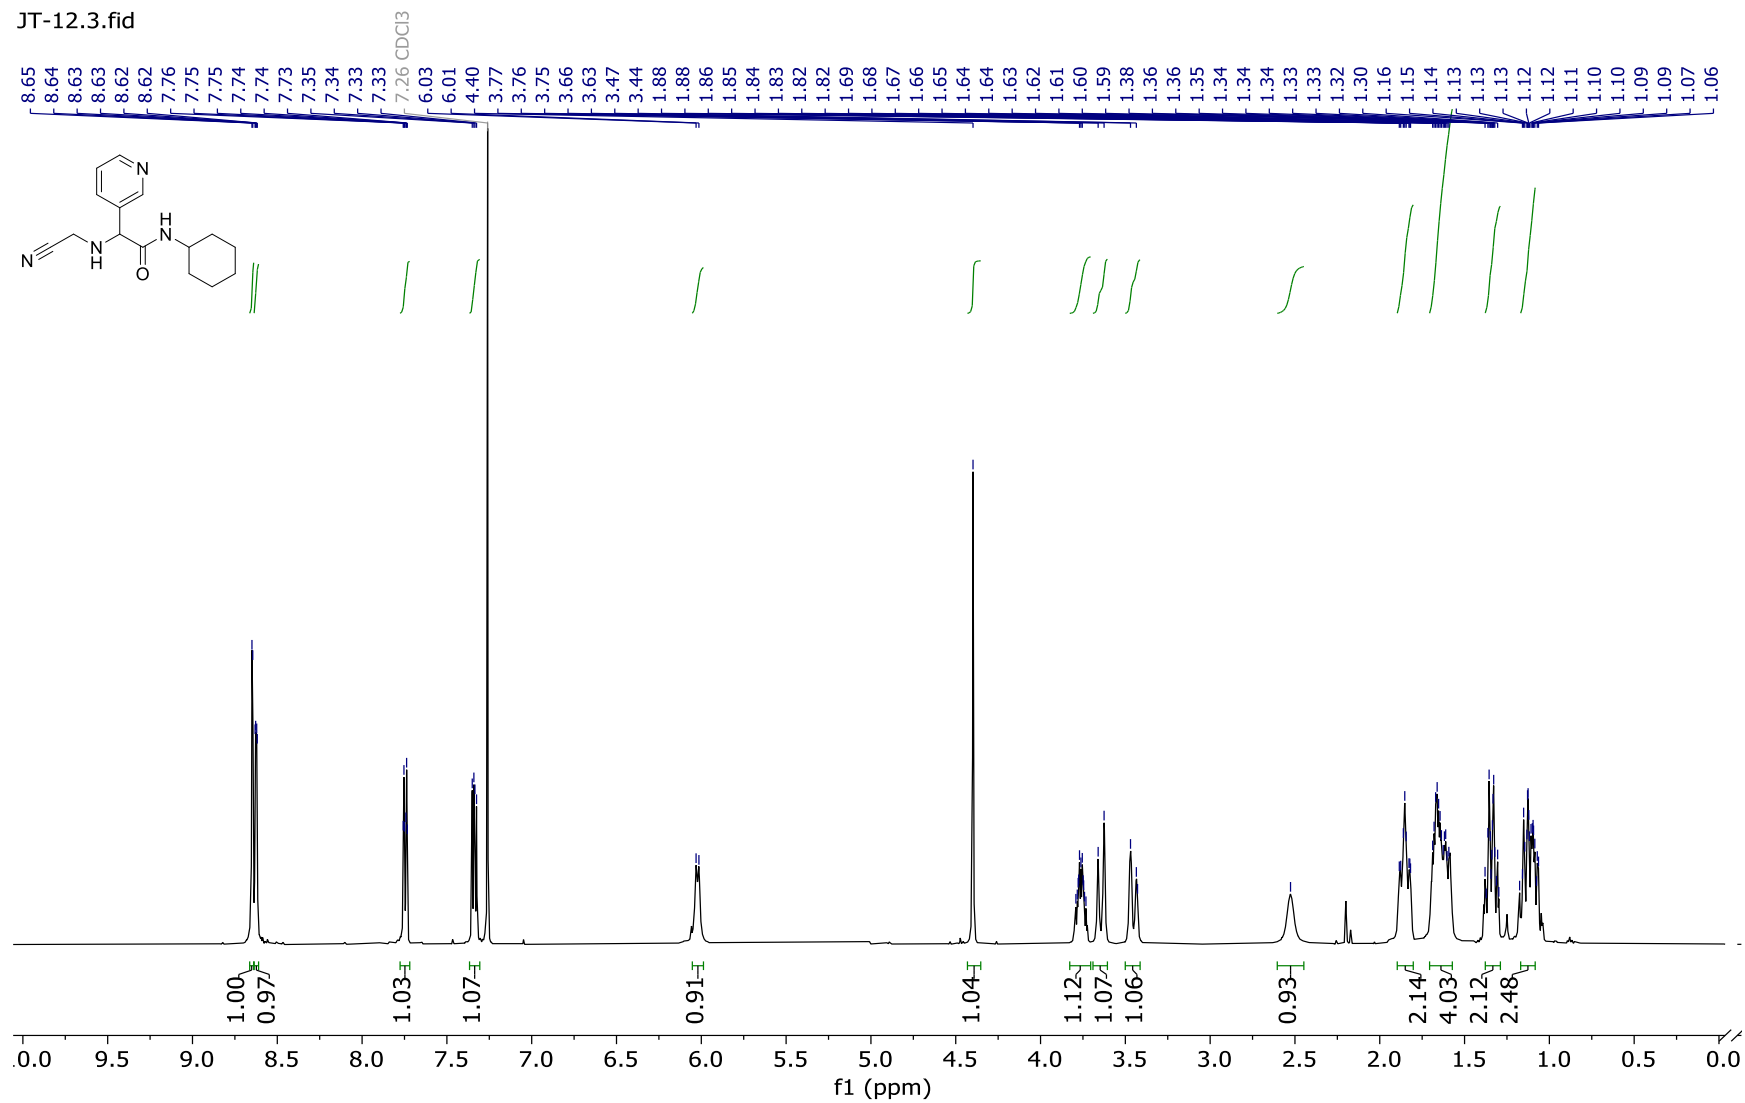

79. Compound **24a** <sup>13</sup>C NMR

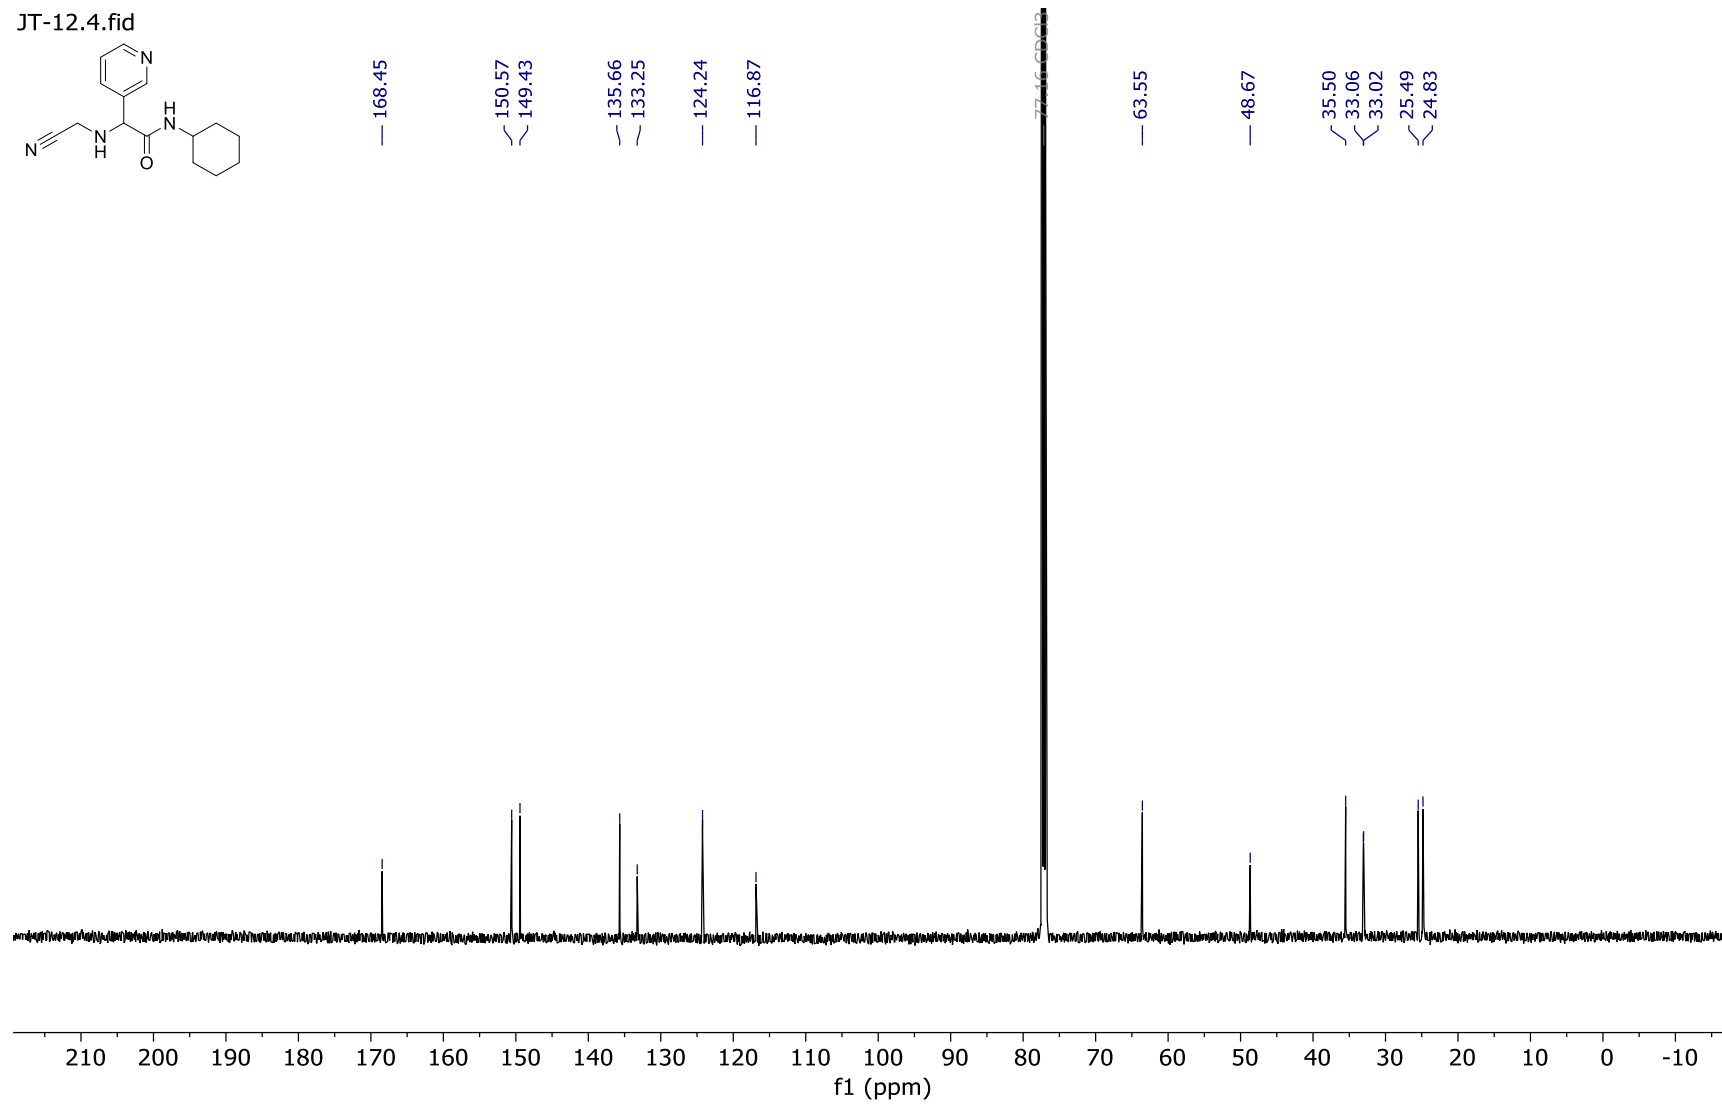

80. Compound 25a <sup>1</sup>H NMR

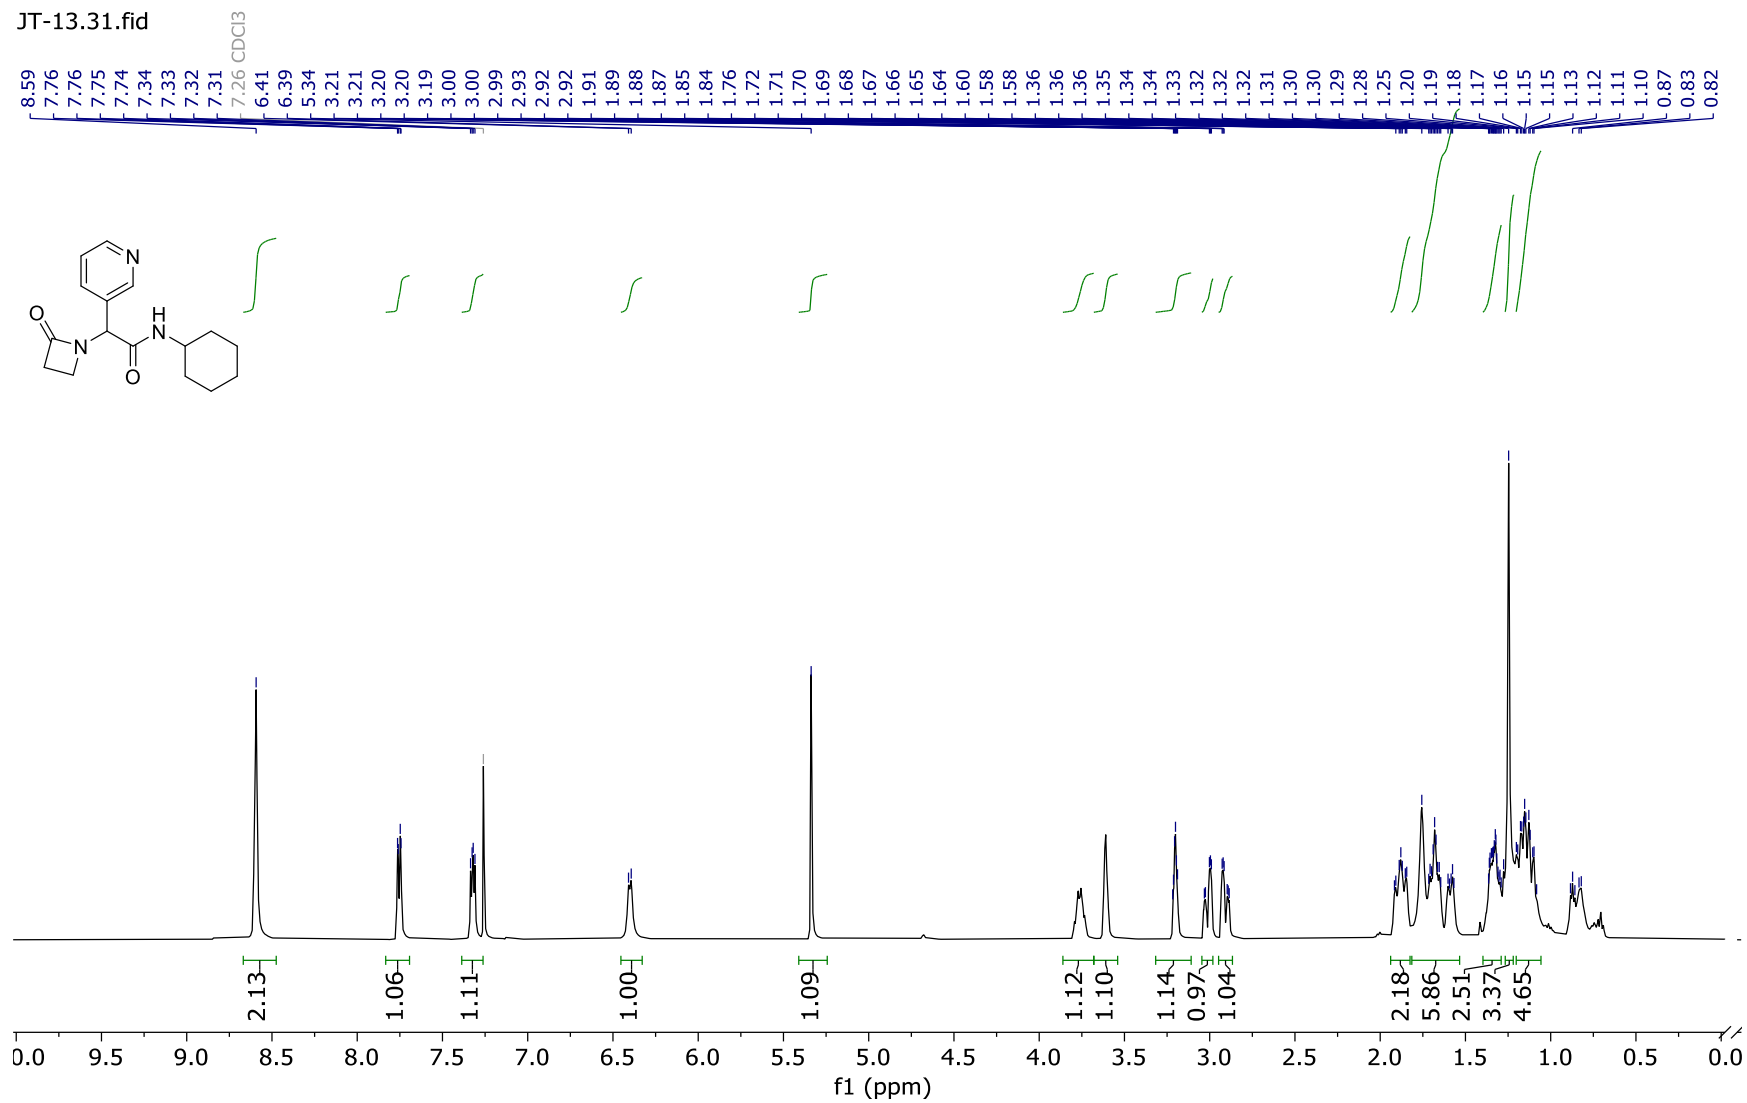

81. Compound **25a** <sup>13</sup>C NMR

JT-13.32.fid

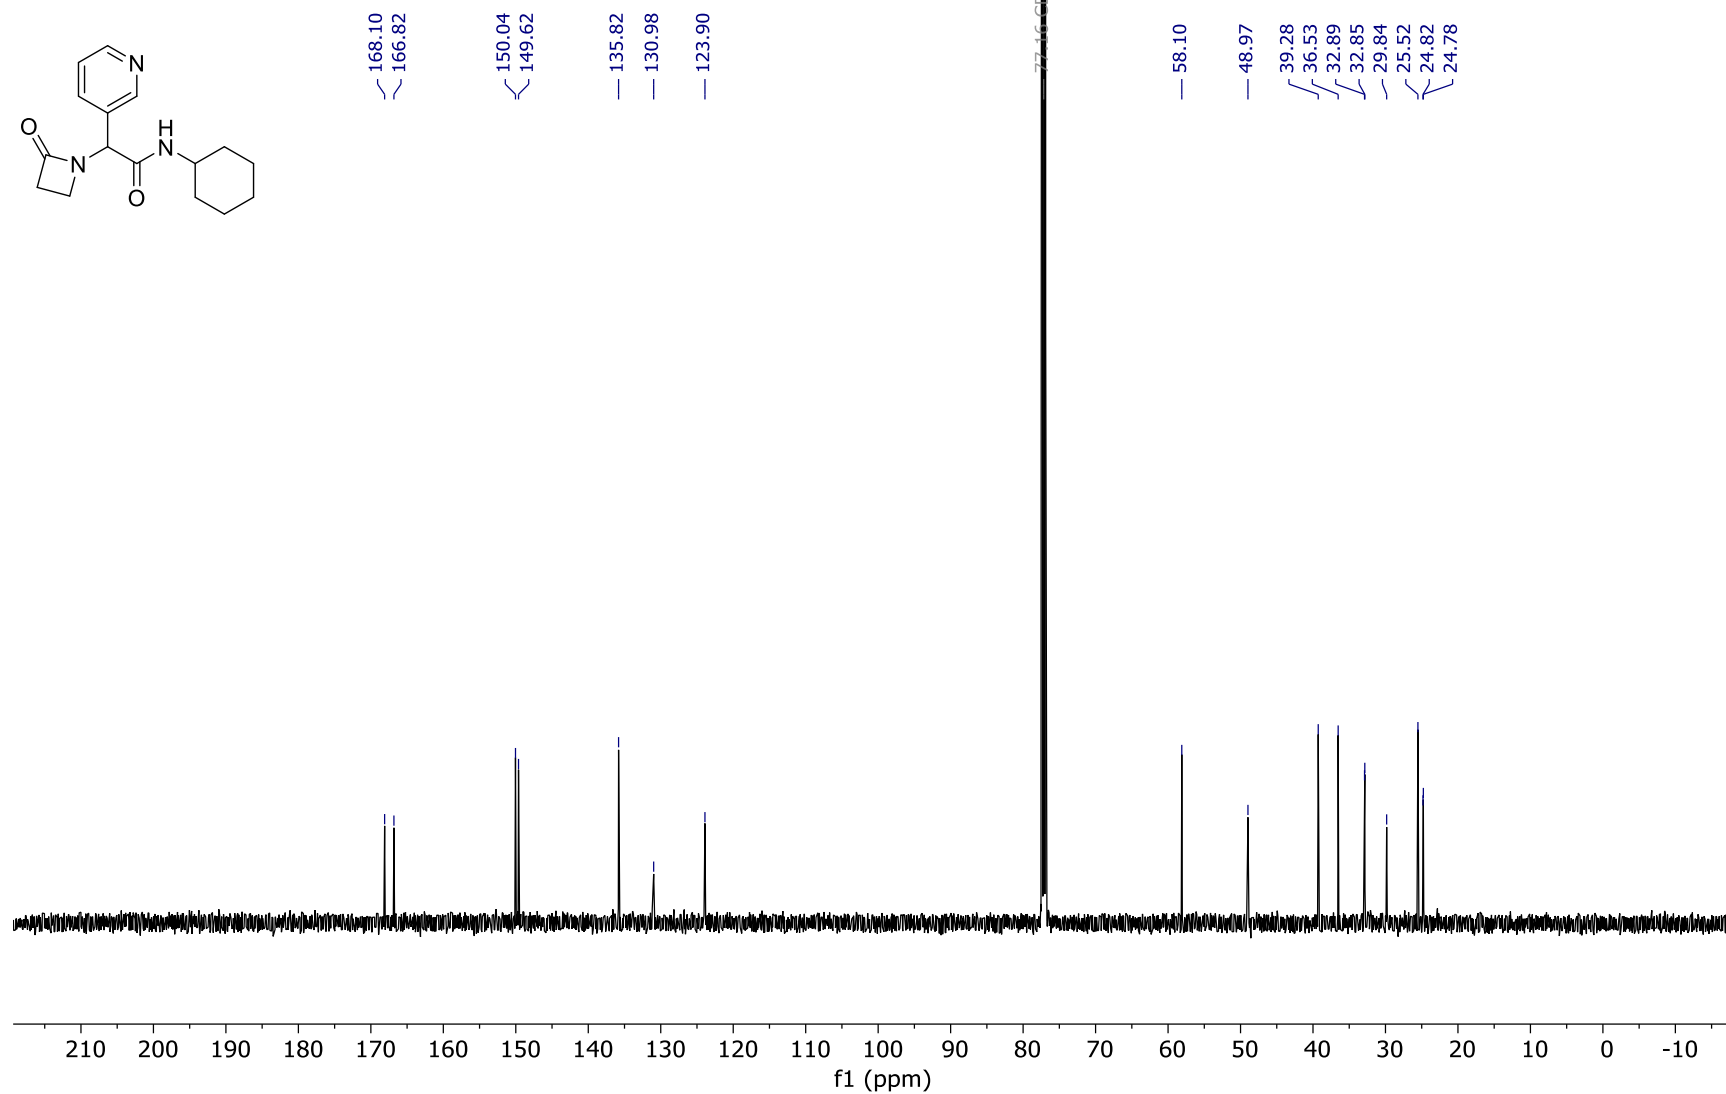

82. Compound **26b** <sup>1</sup>H NMR

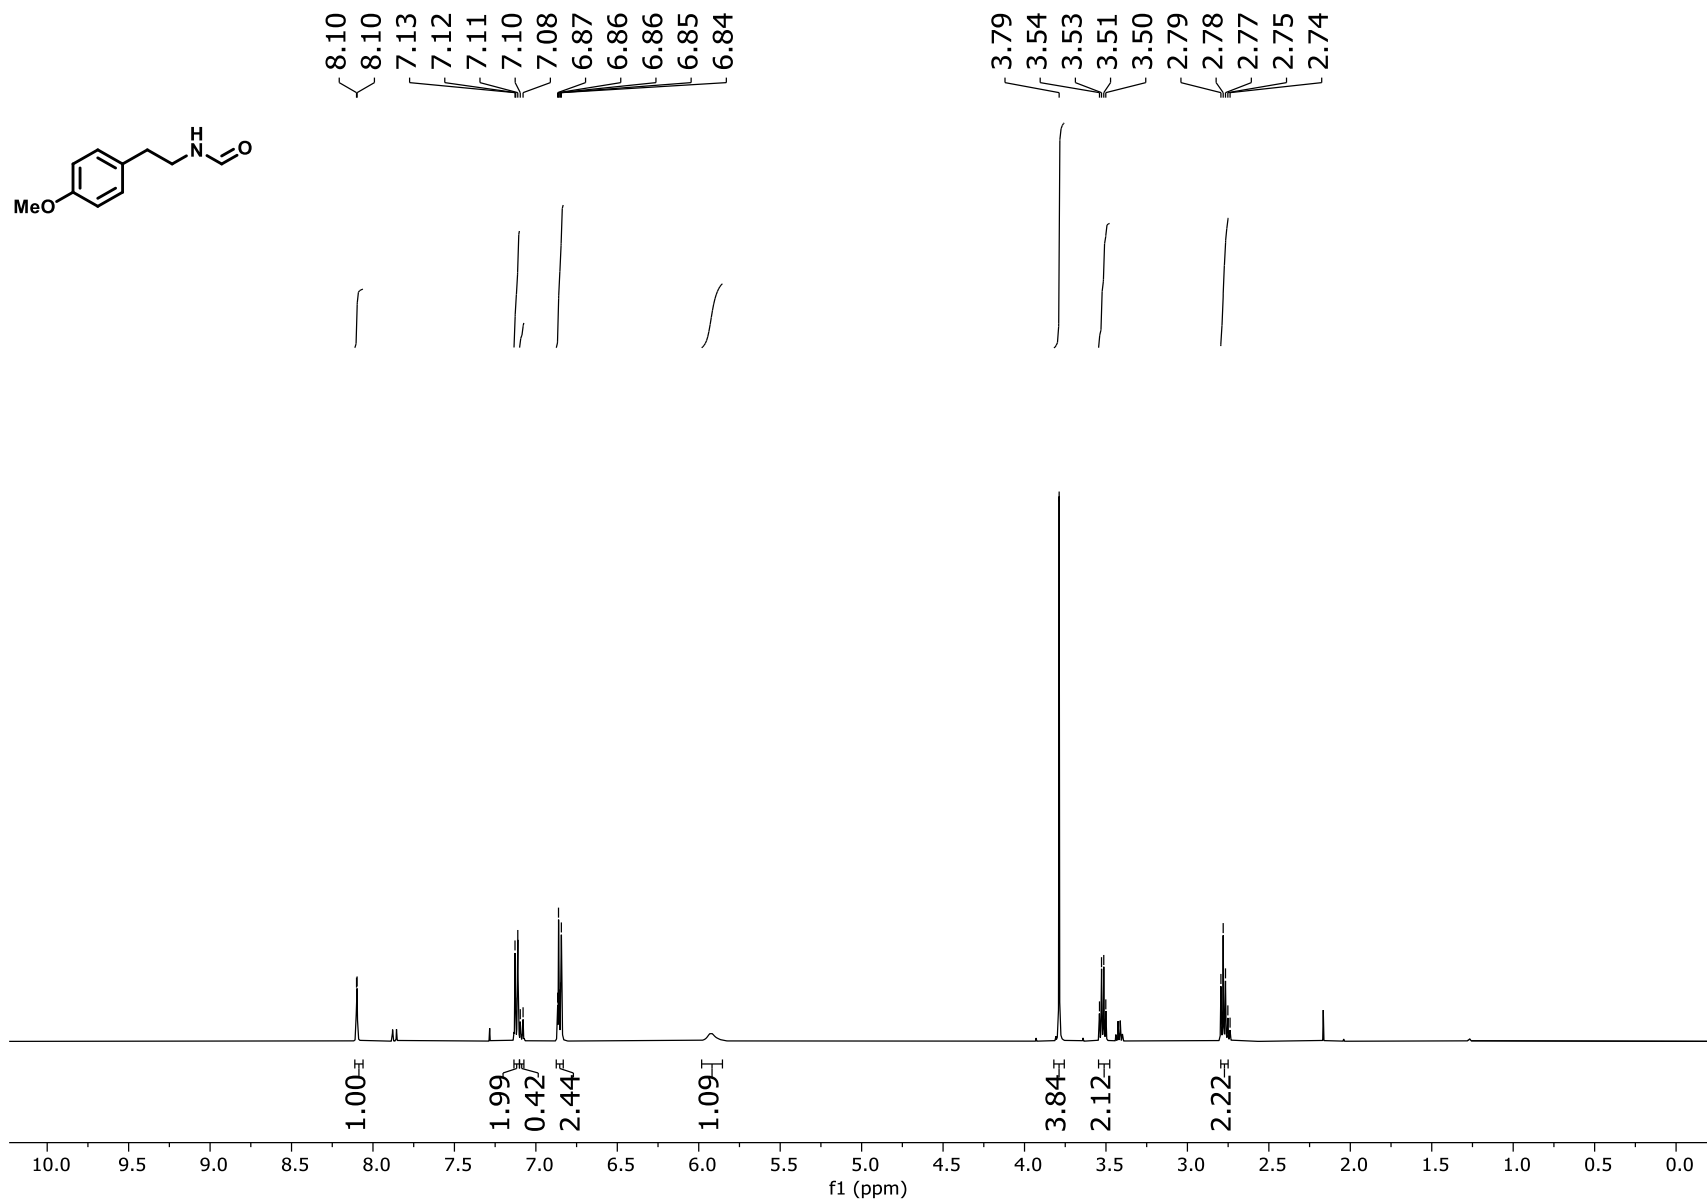

83. Compound 26b <sup>13</sup>C NMR



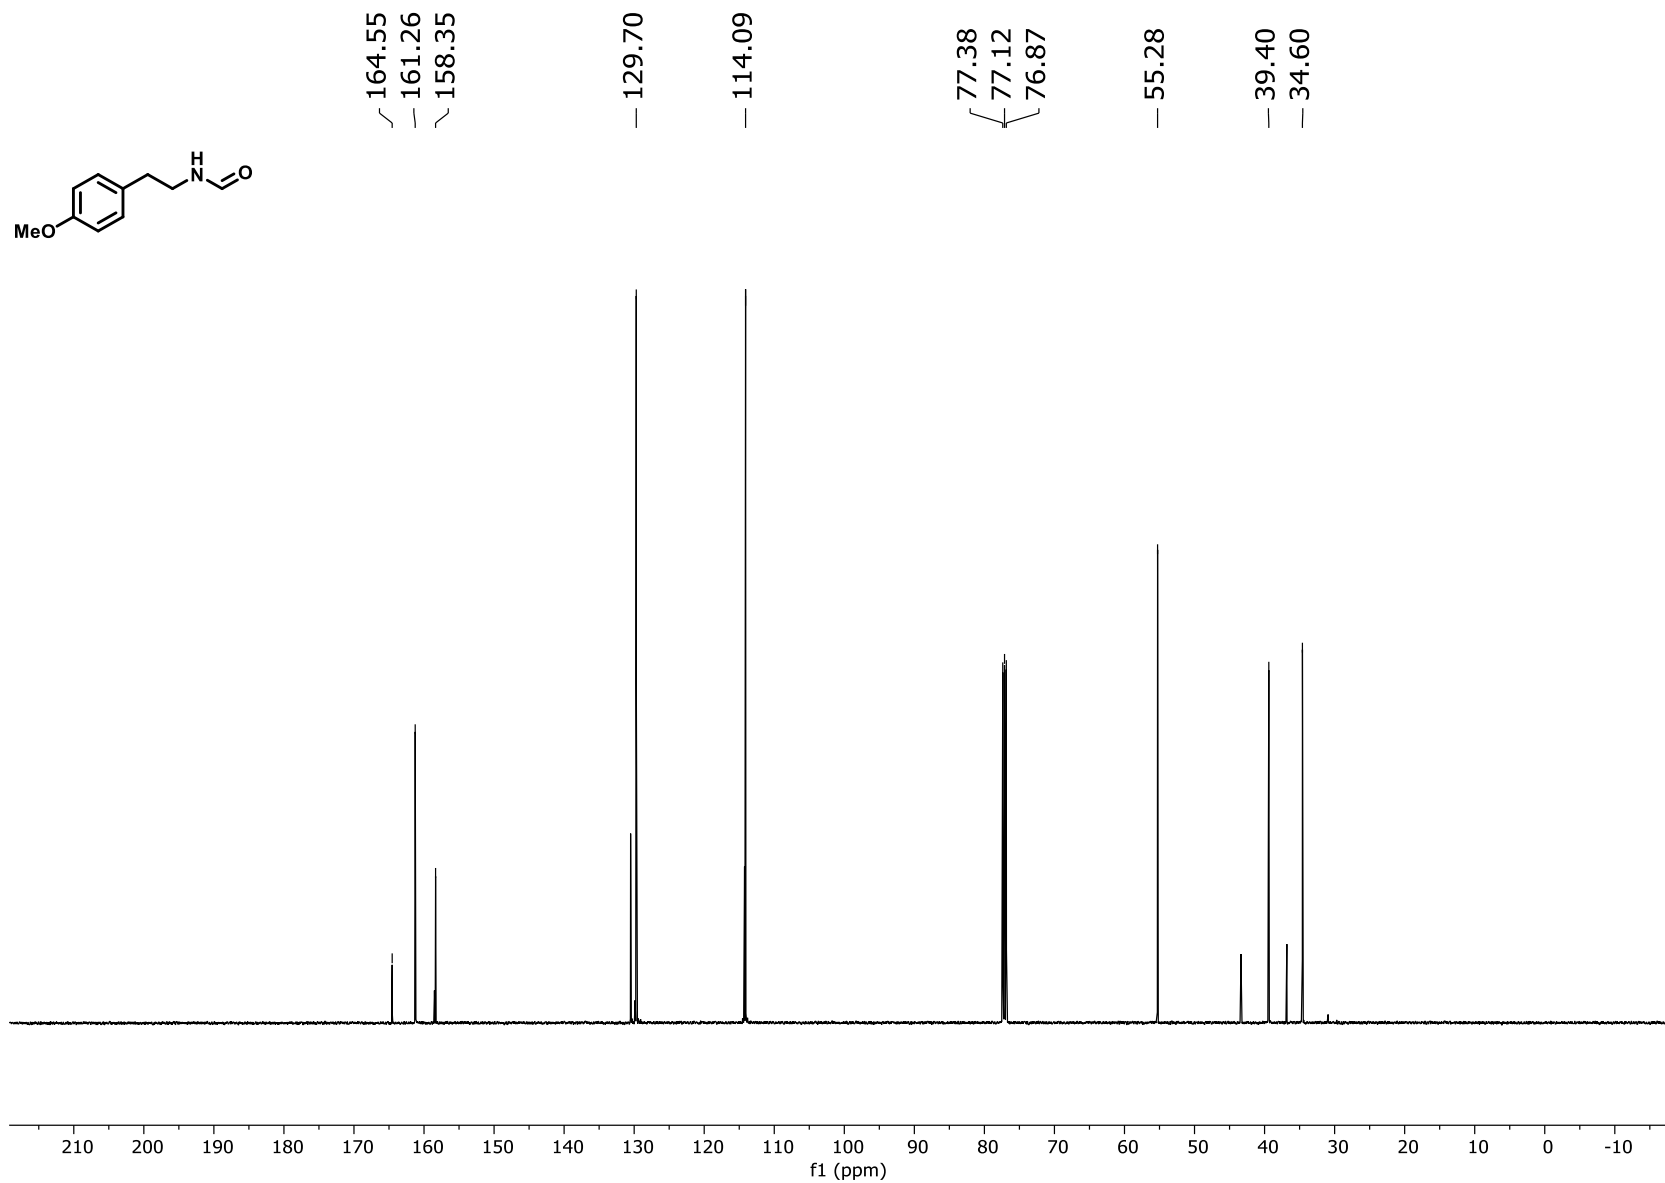

84. Compound 26c <sup>13</sup>C NMR

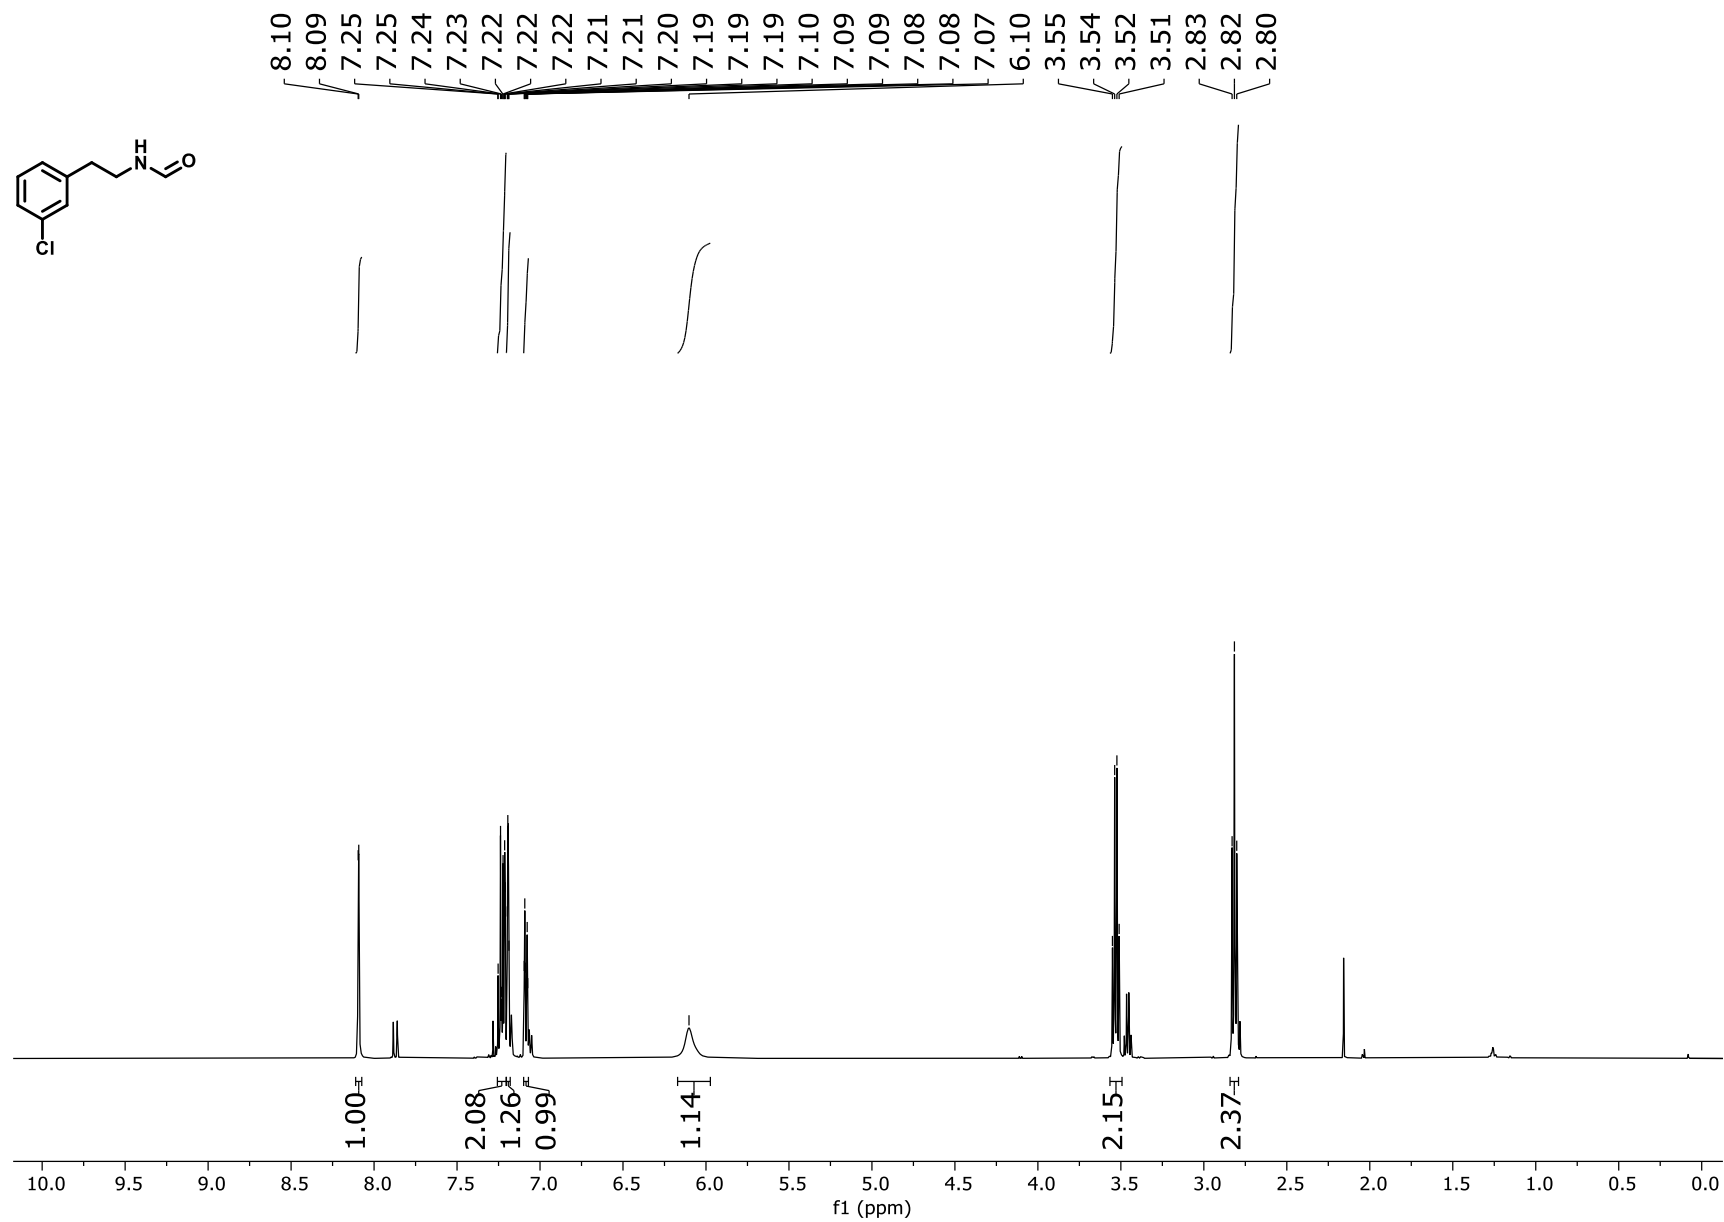

85. Compound **26c** <sup>13</sup>C NMR

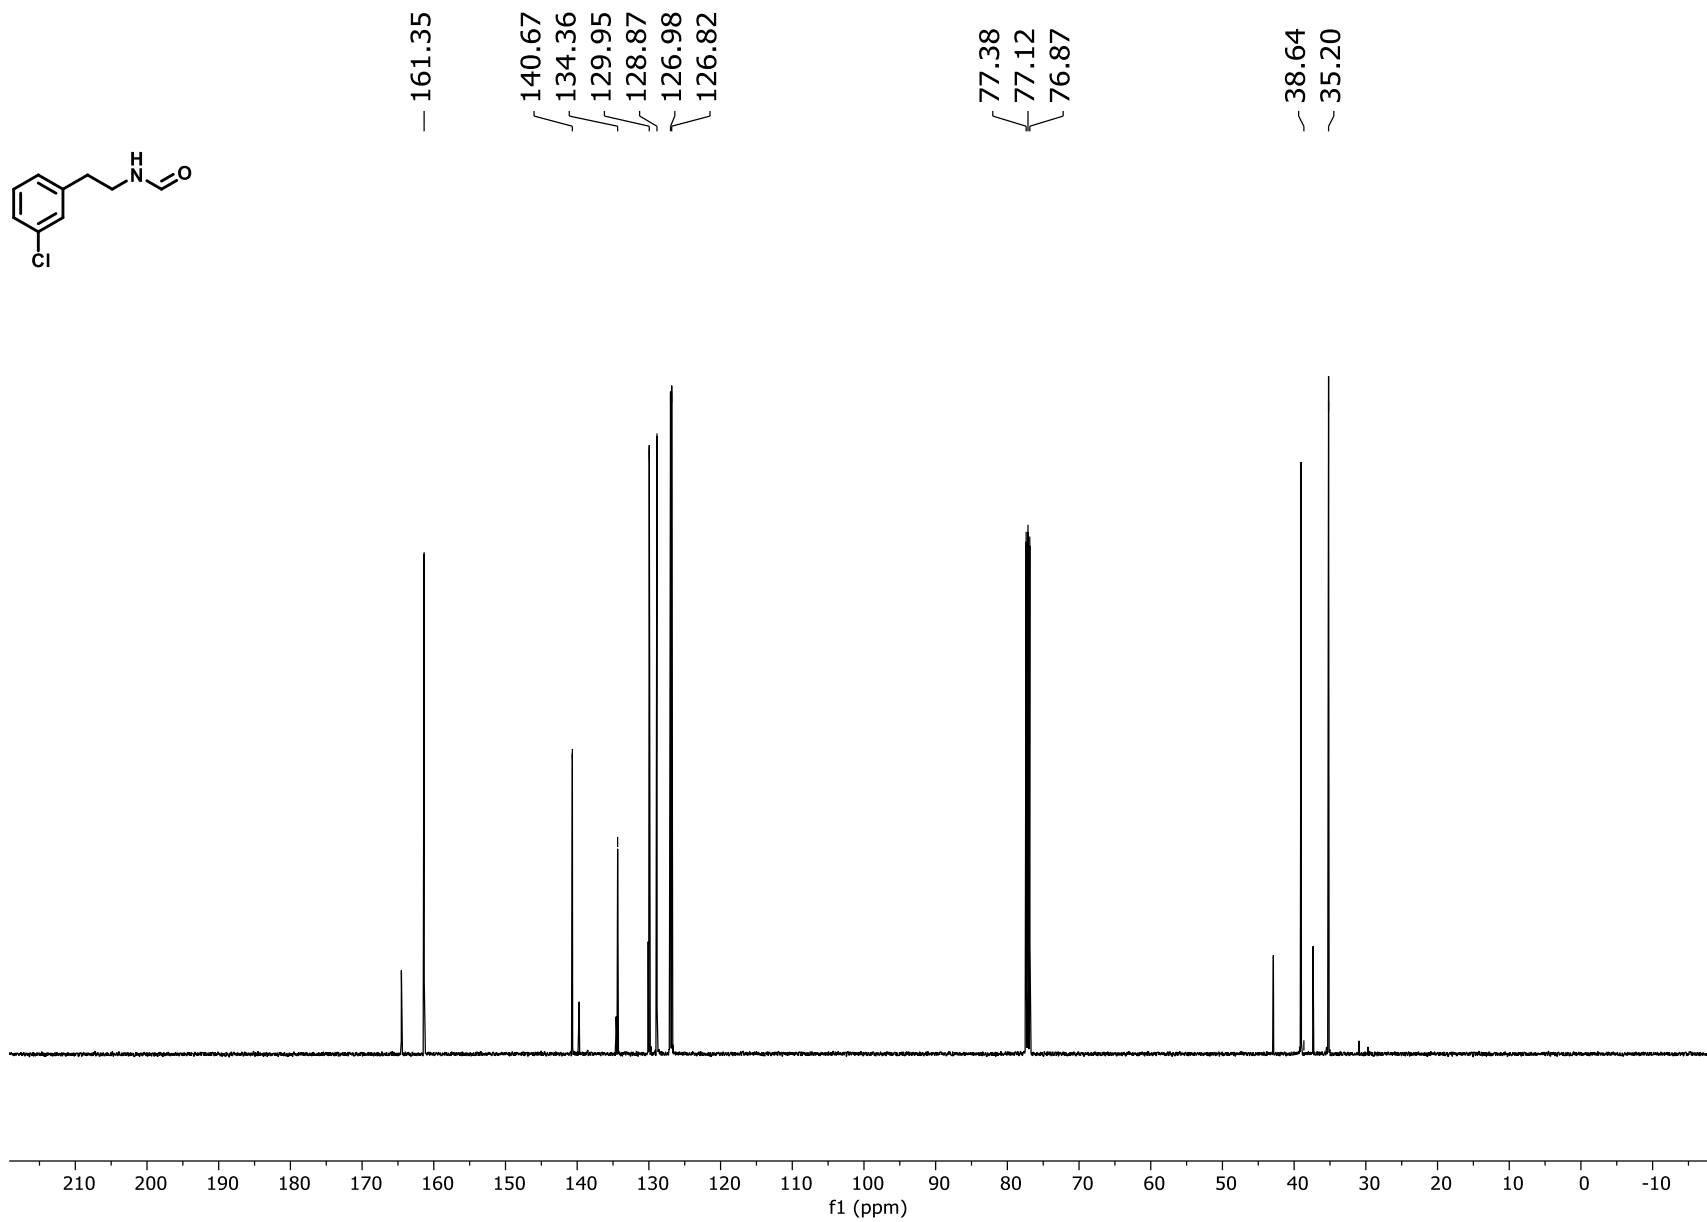

86. Compound **26d** <sup>1</sup>H NMR

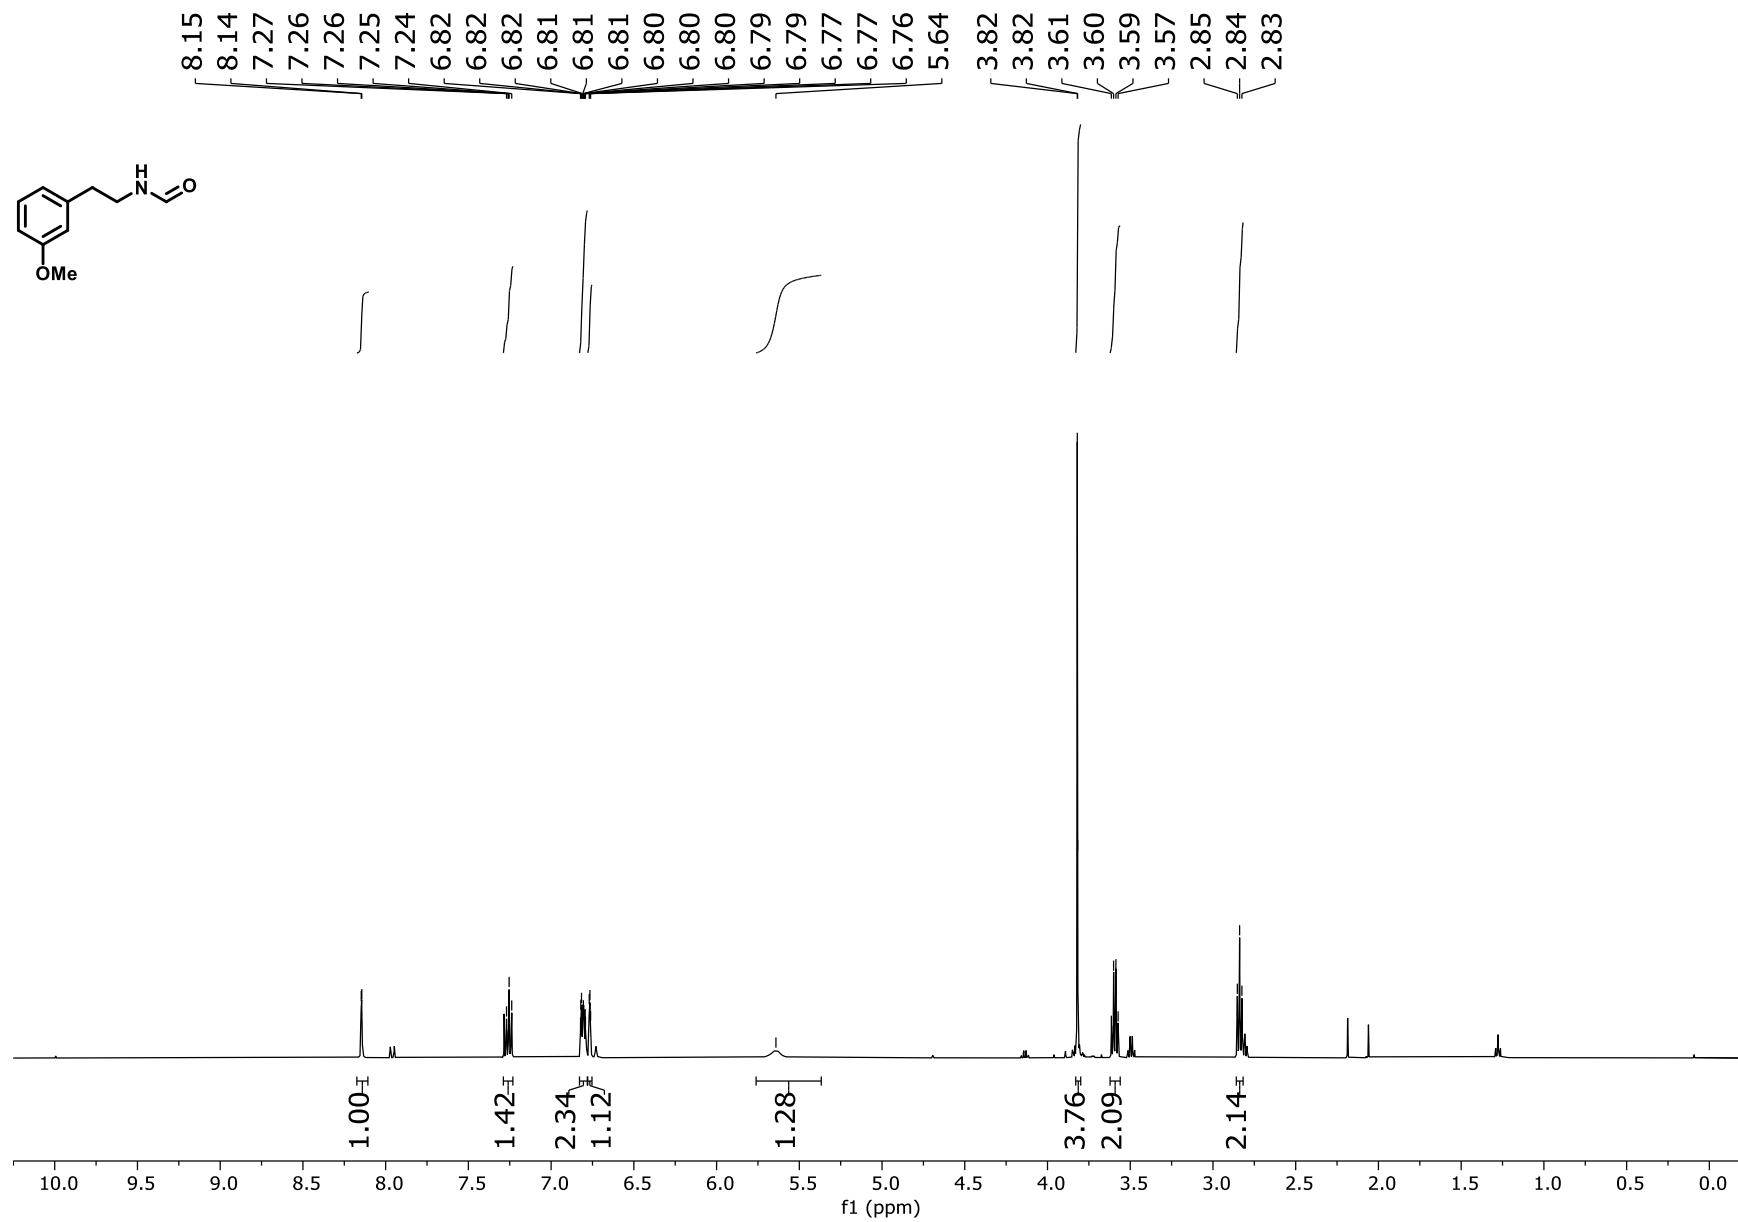

87. Compound **26d** <sup>13</sup>C NMR

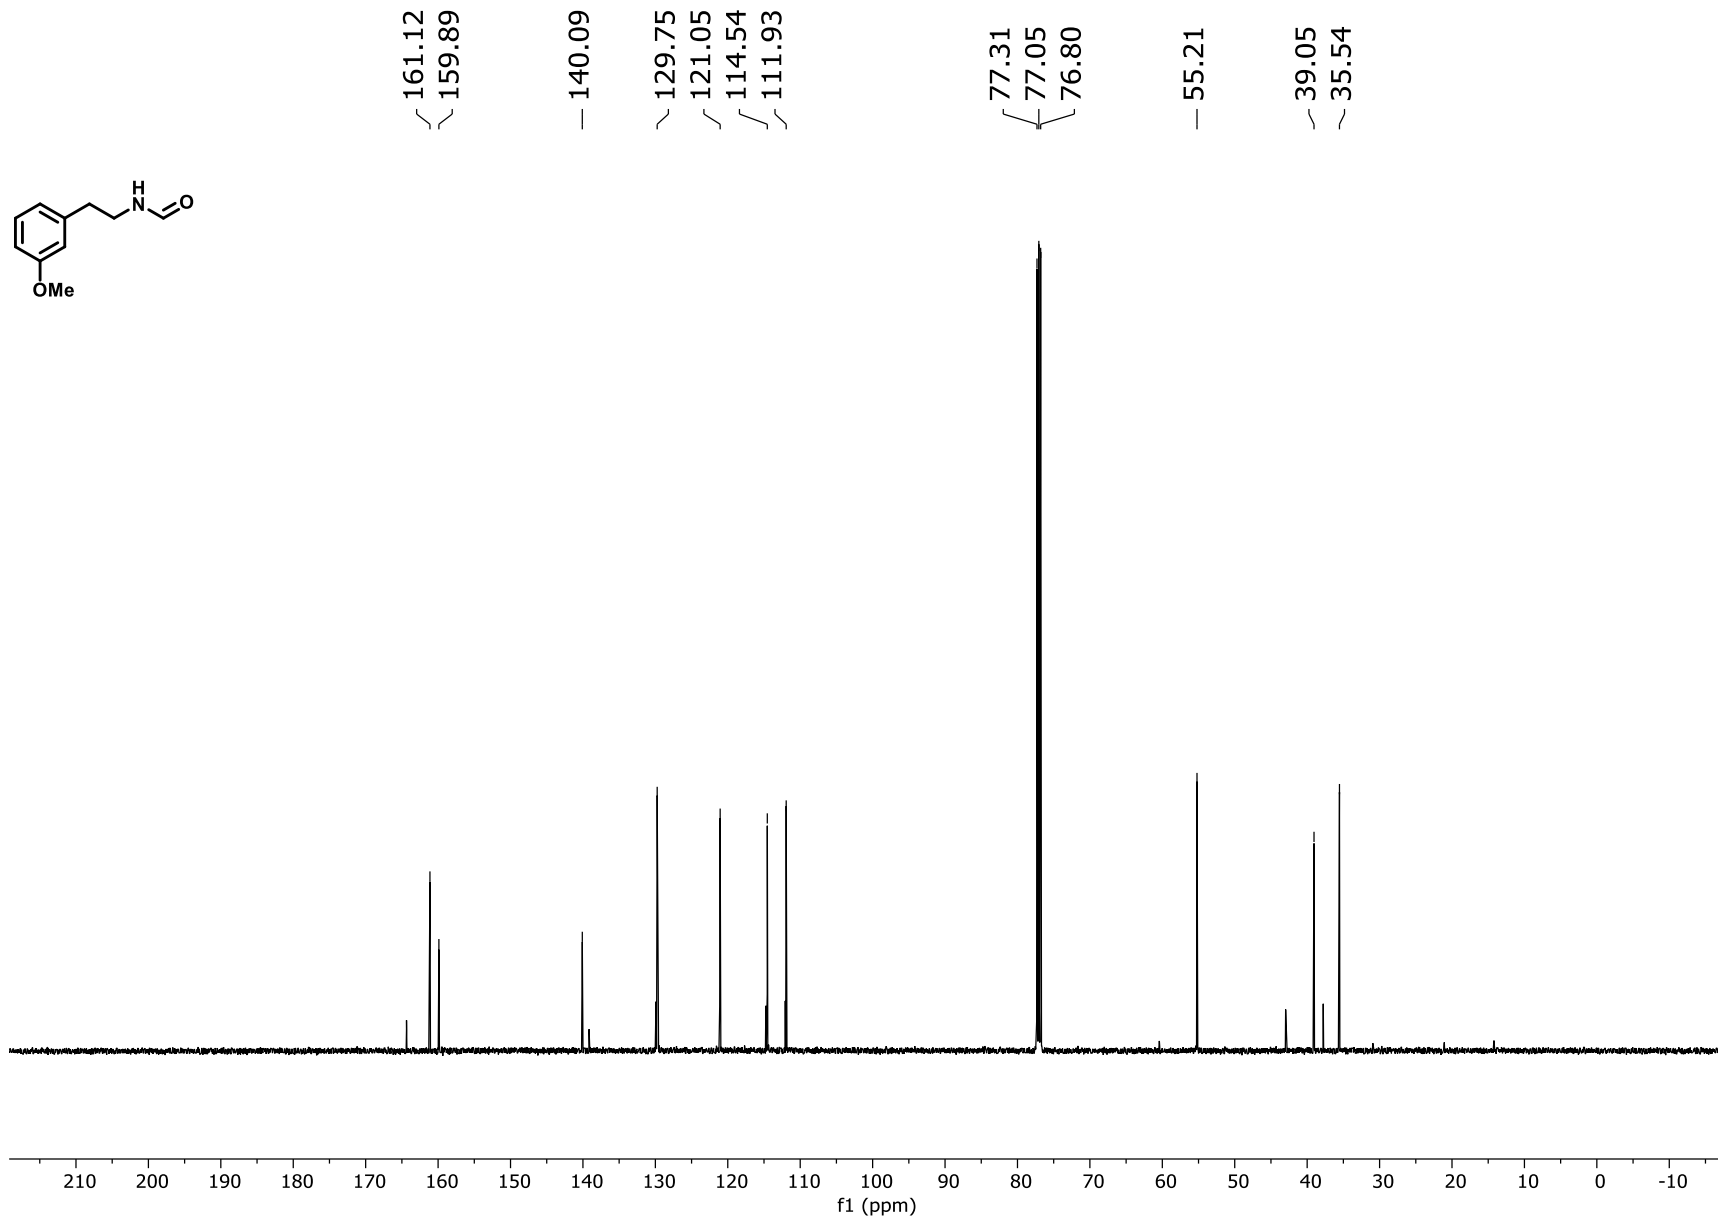

88. Compound **26e** <sup>1</sup>H NMR

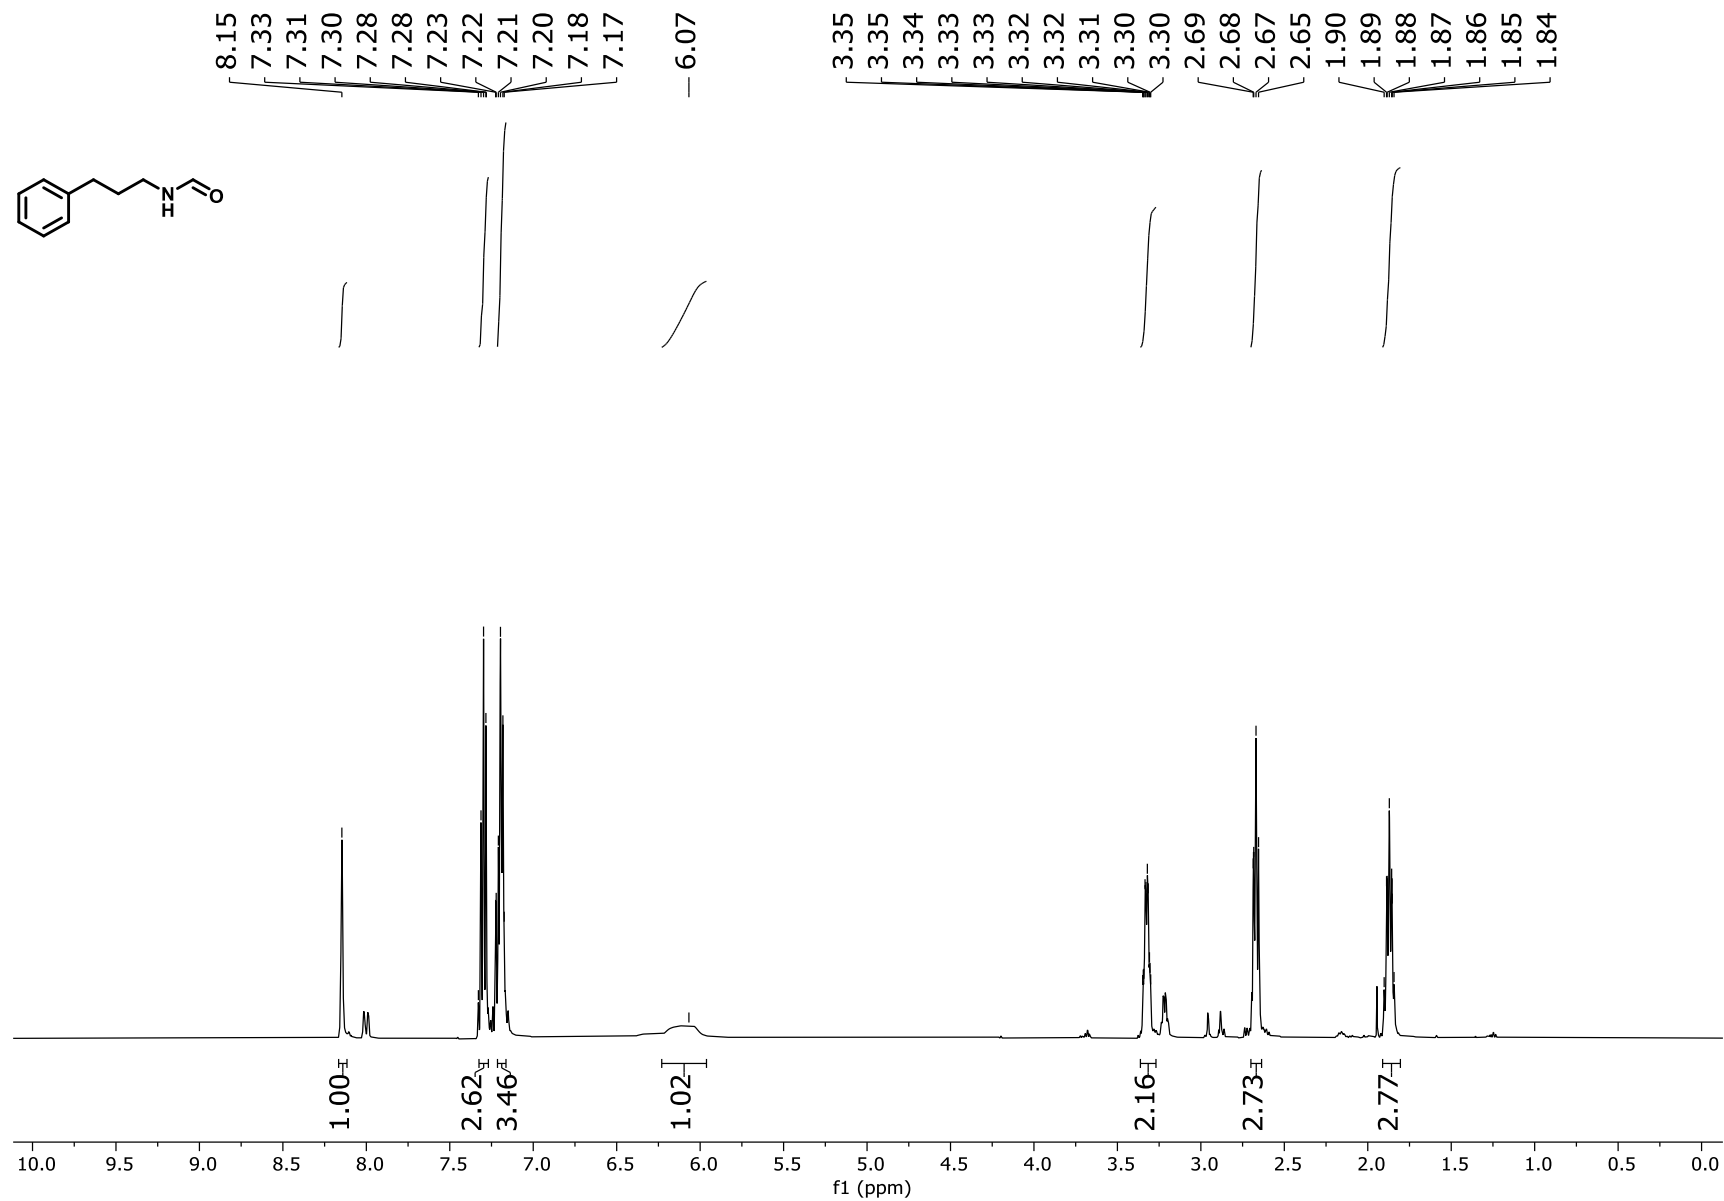

89. Compound **26e** <sup>13</sup>C NMR

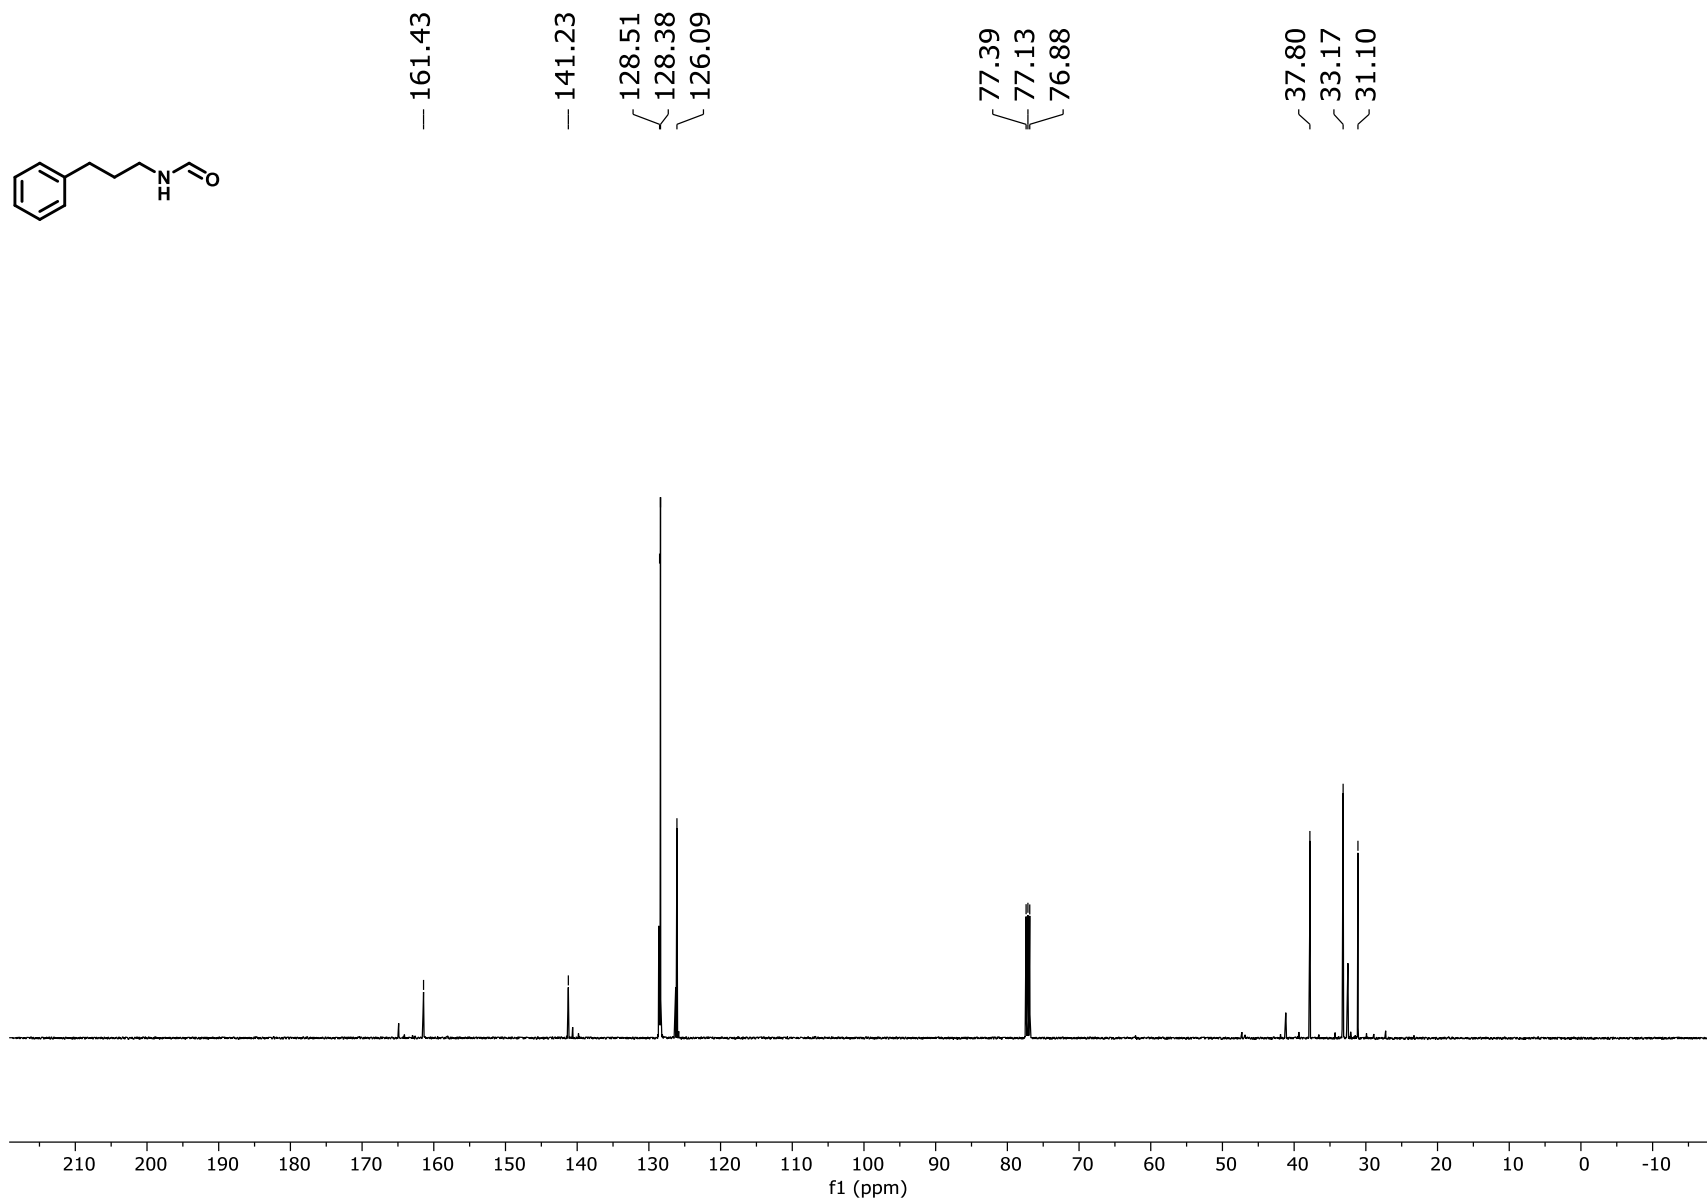

90. Compound **26f** <sup>1</sup>H NMR

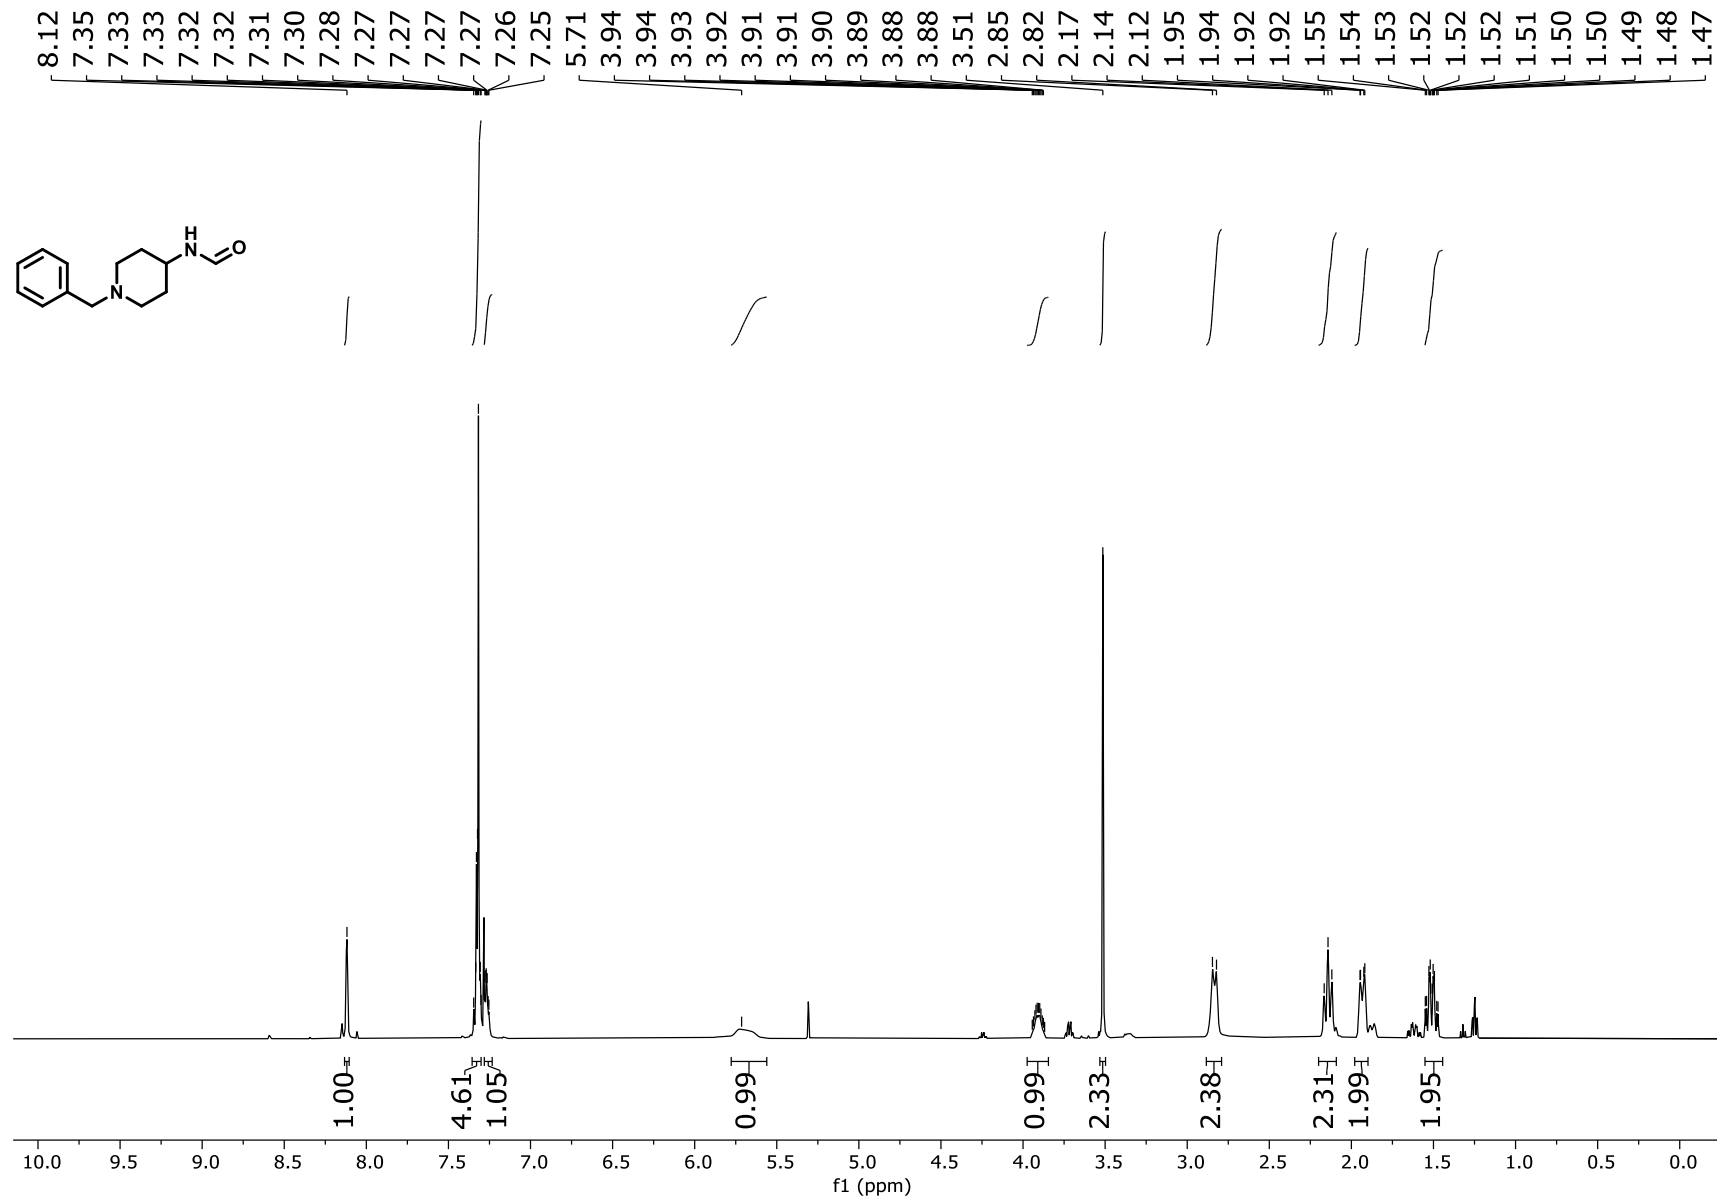



91. Compound **26f** <sup>13</sup>C NMR

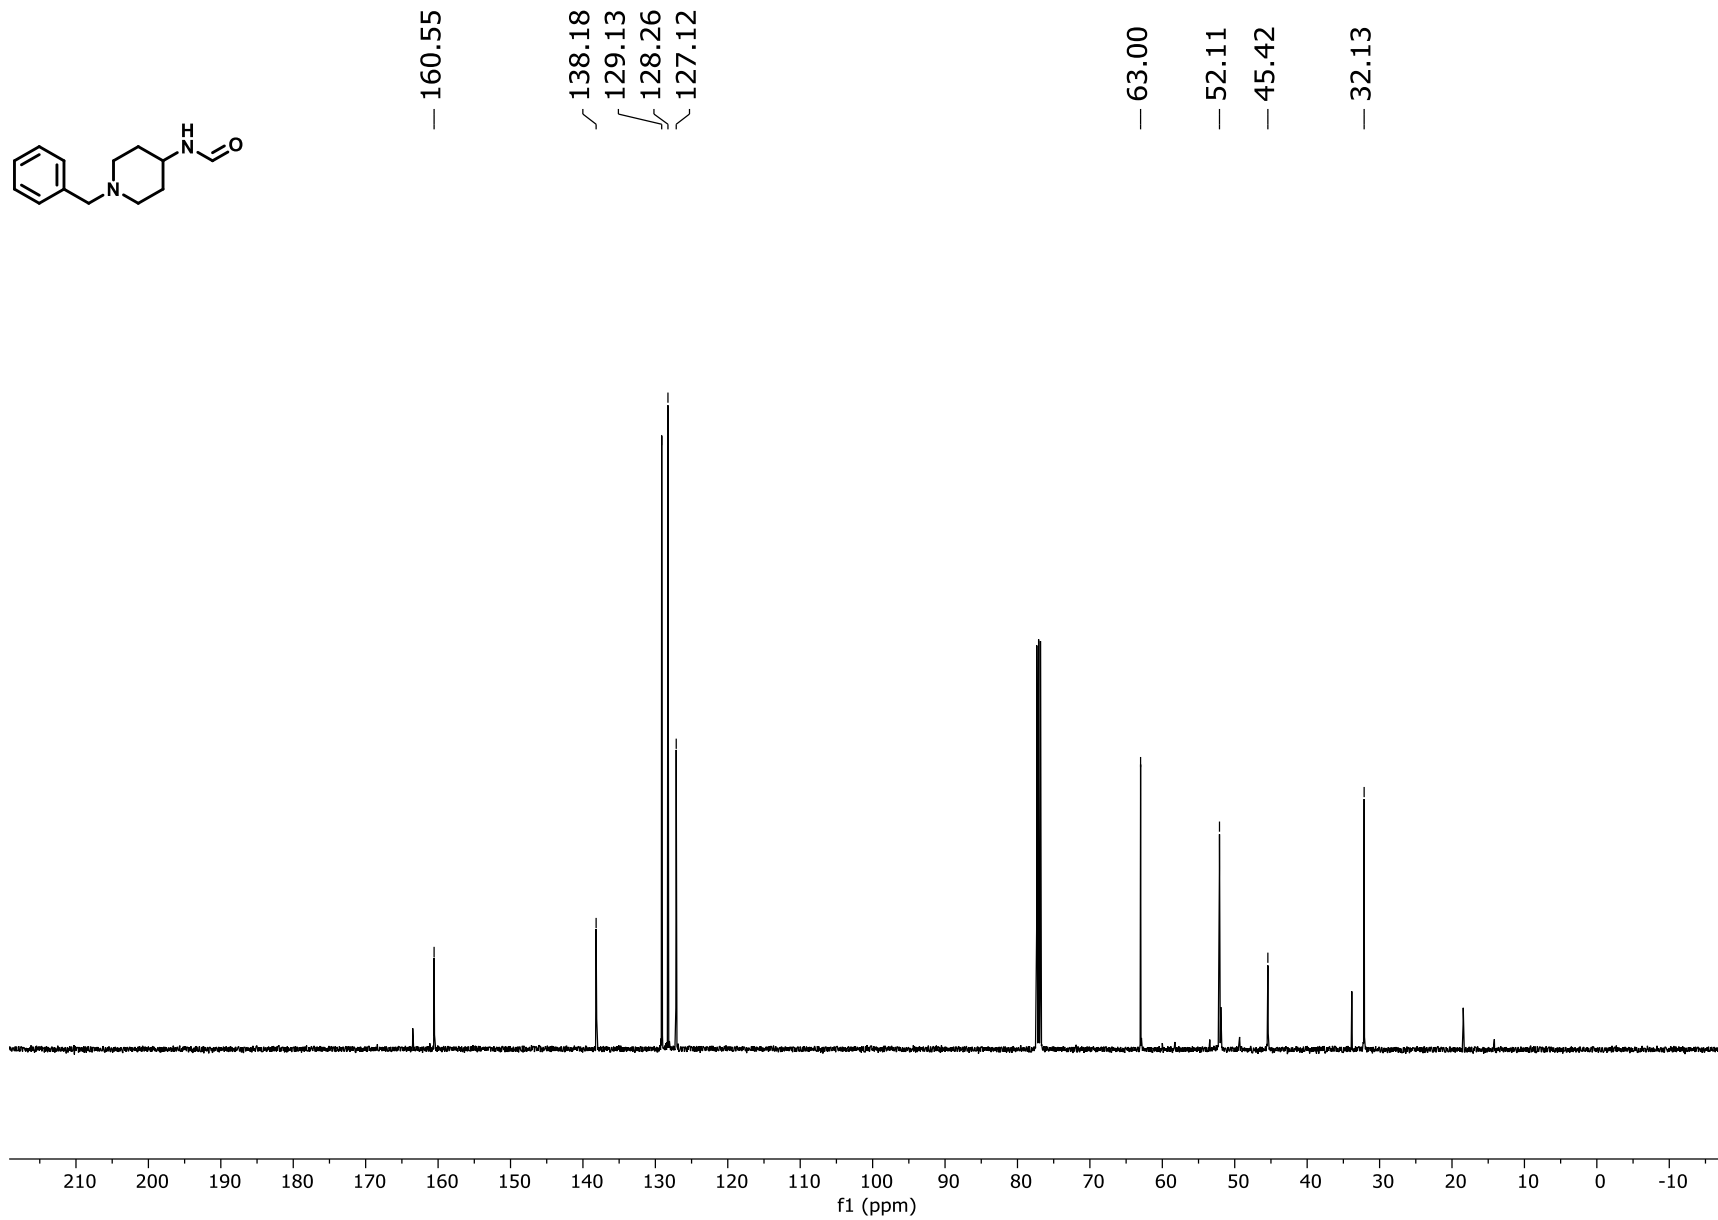

92. Compound **26g** <sup>1</sup>H NMR

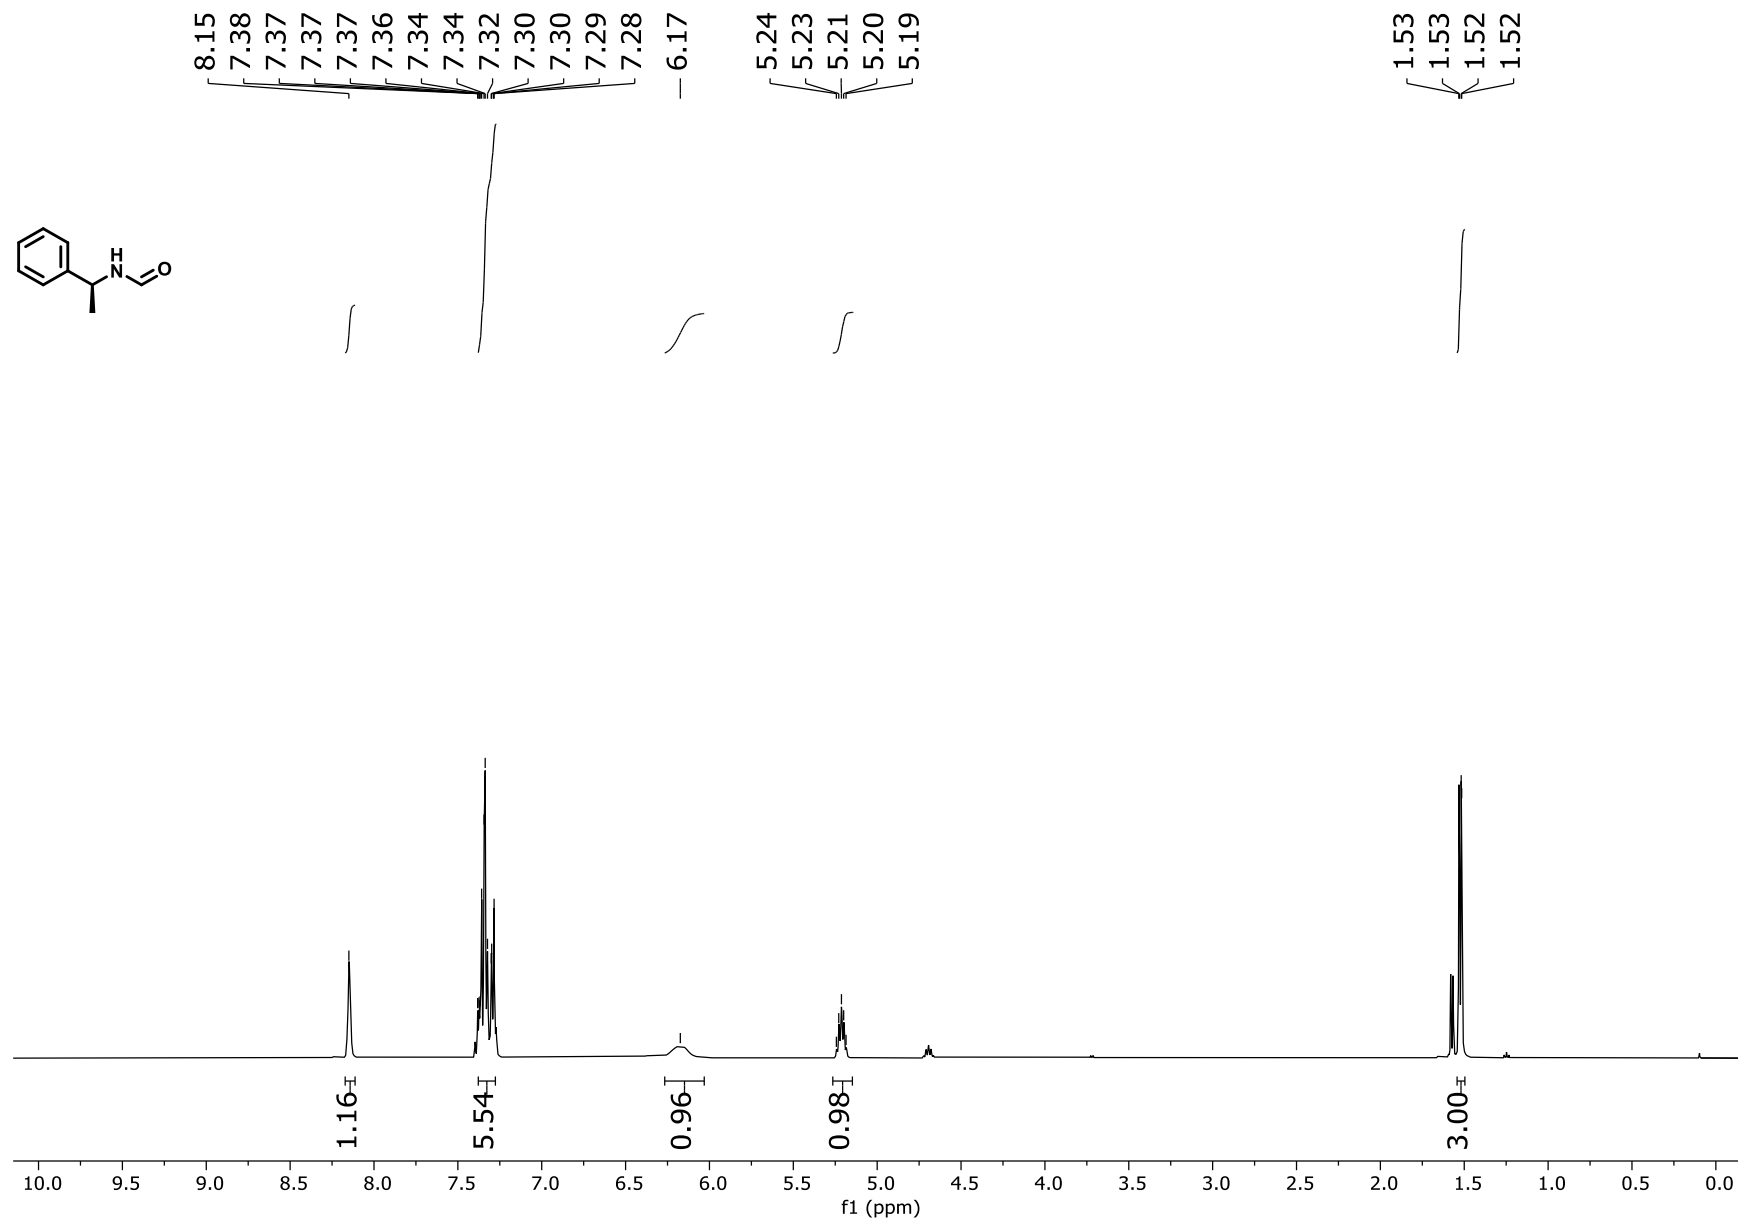

93. Compound **26g** <sup>13</sup>C NMR

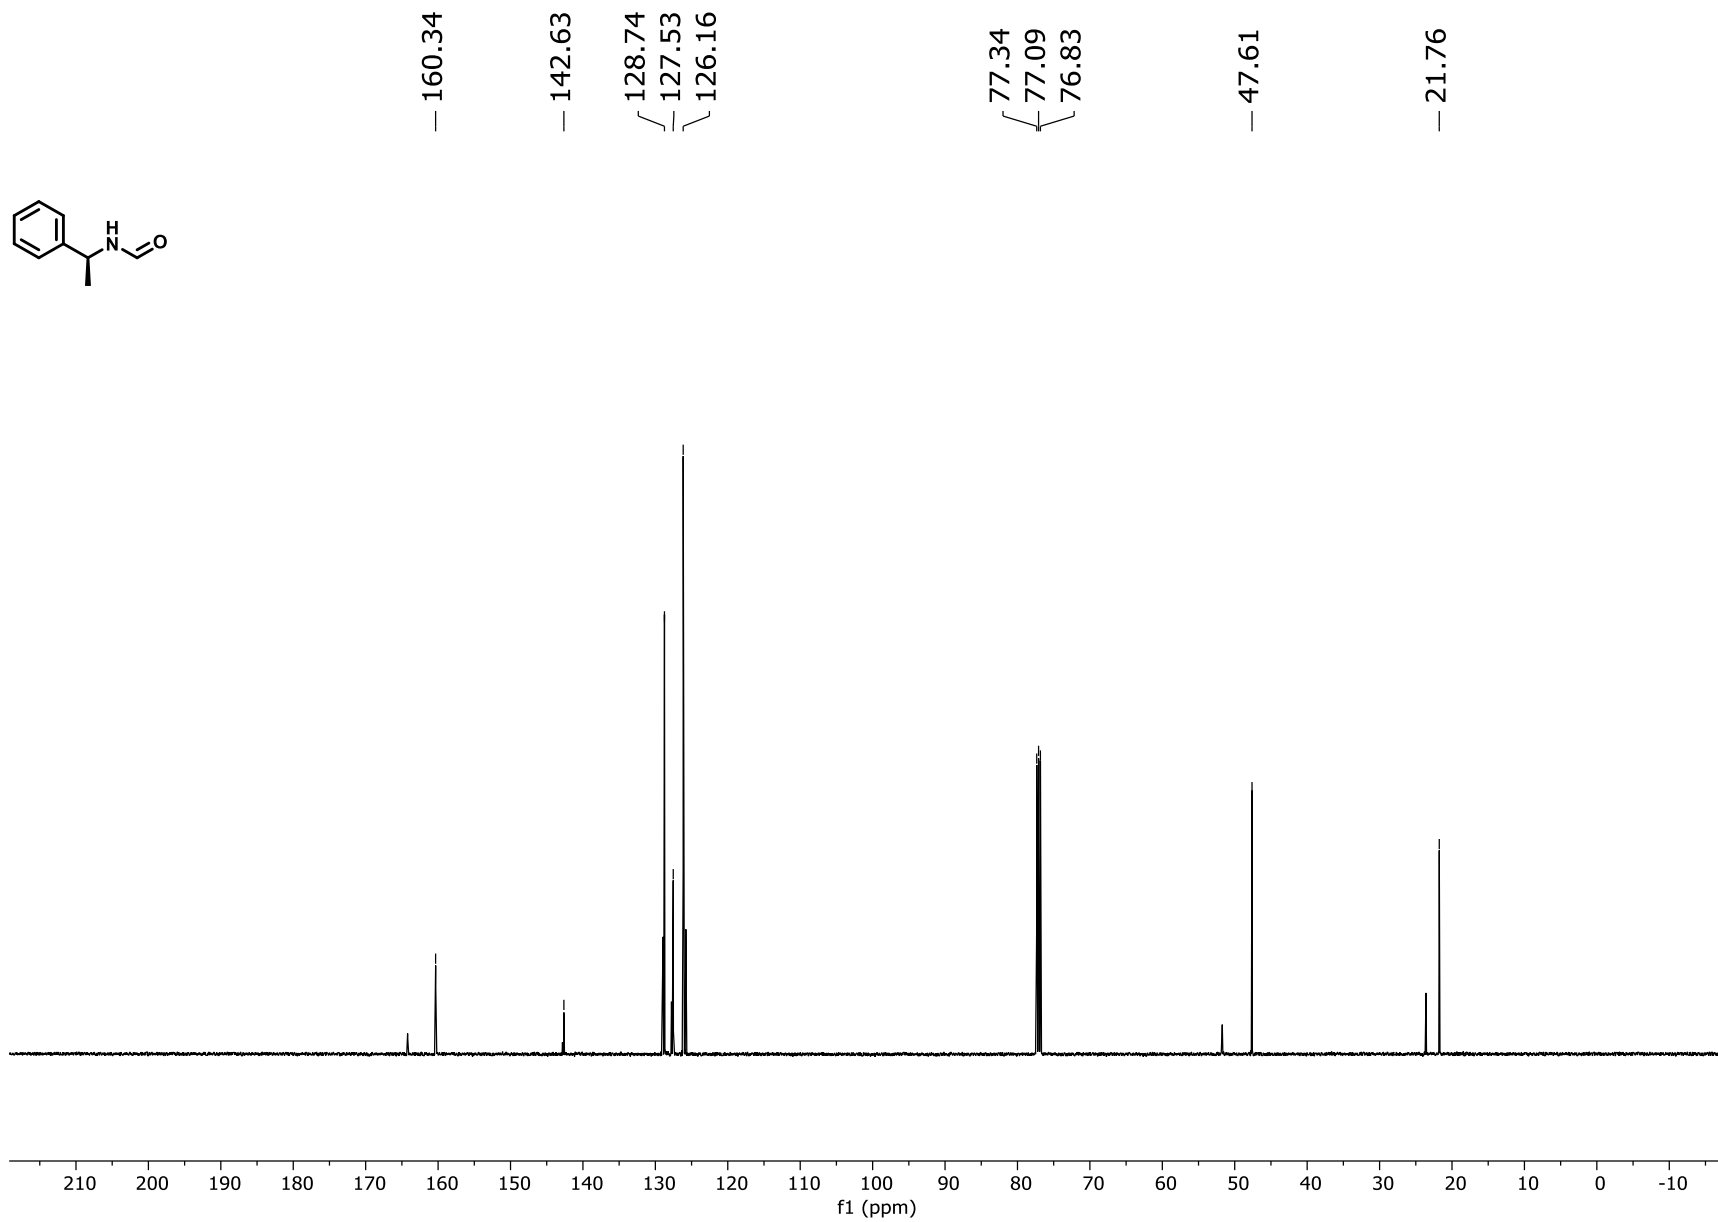

94. Compound **27b** <sup>1</sup>H NMR

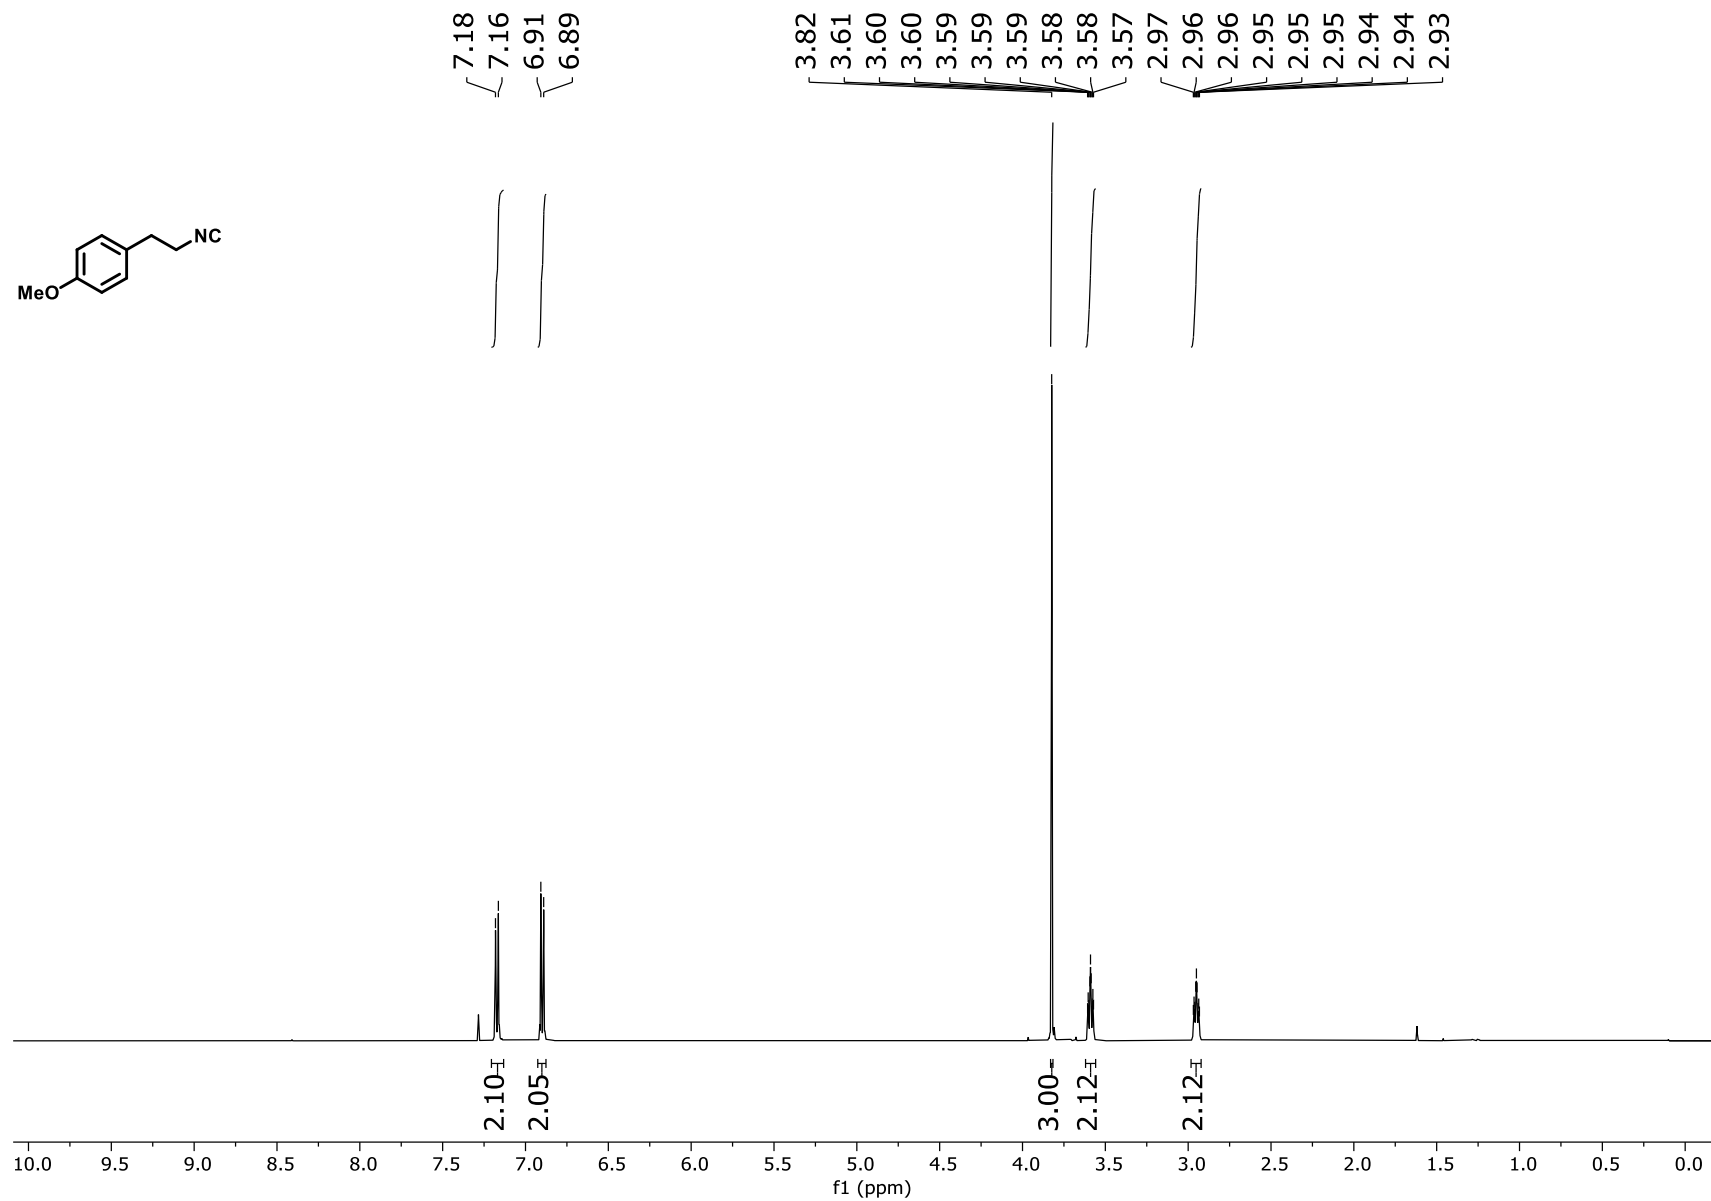

95. Compound **27b** <sup>13</sup>C NMR

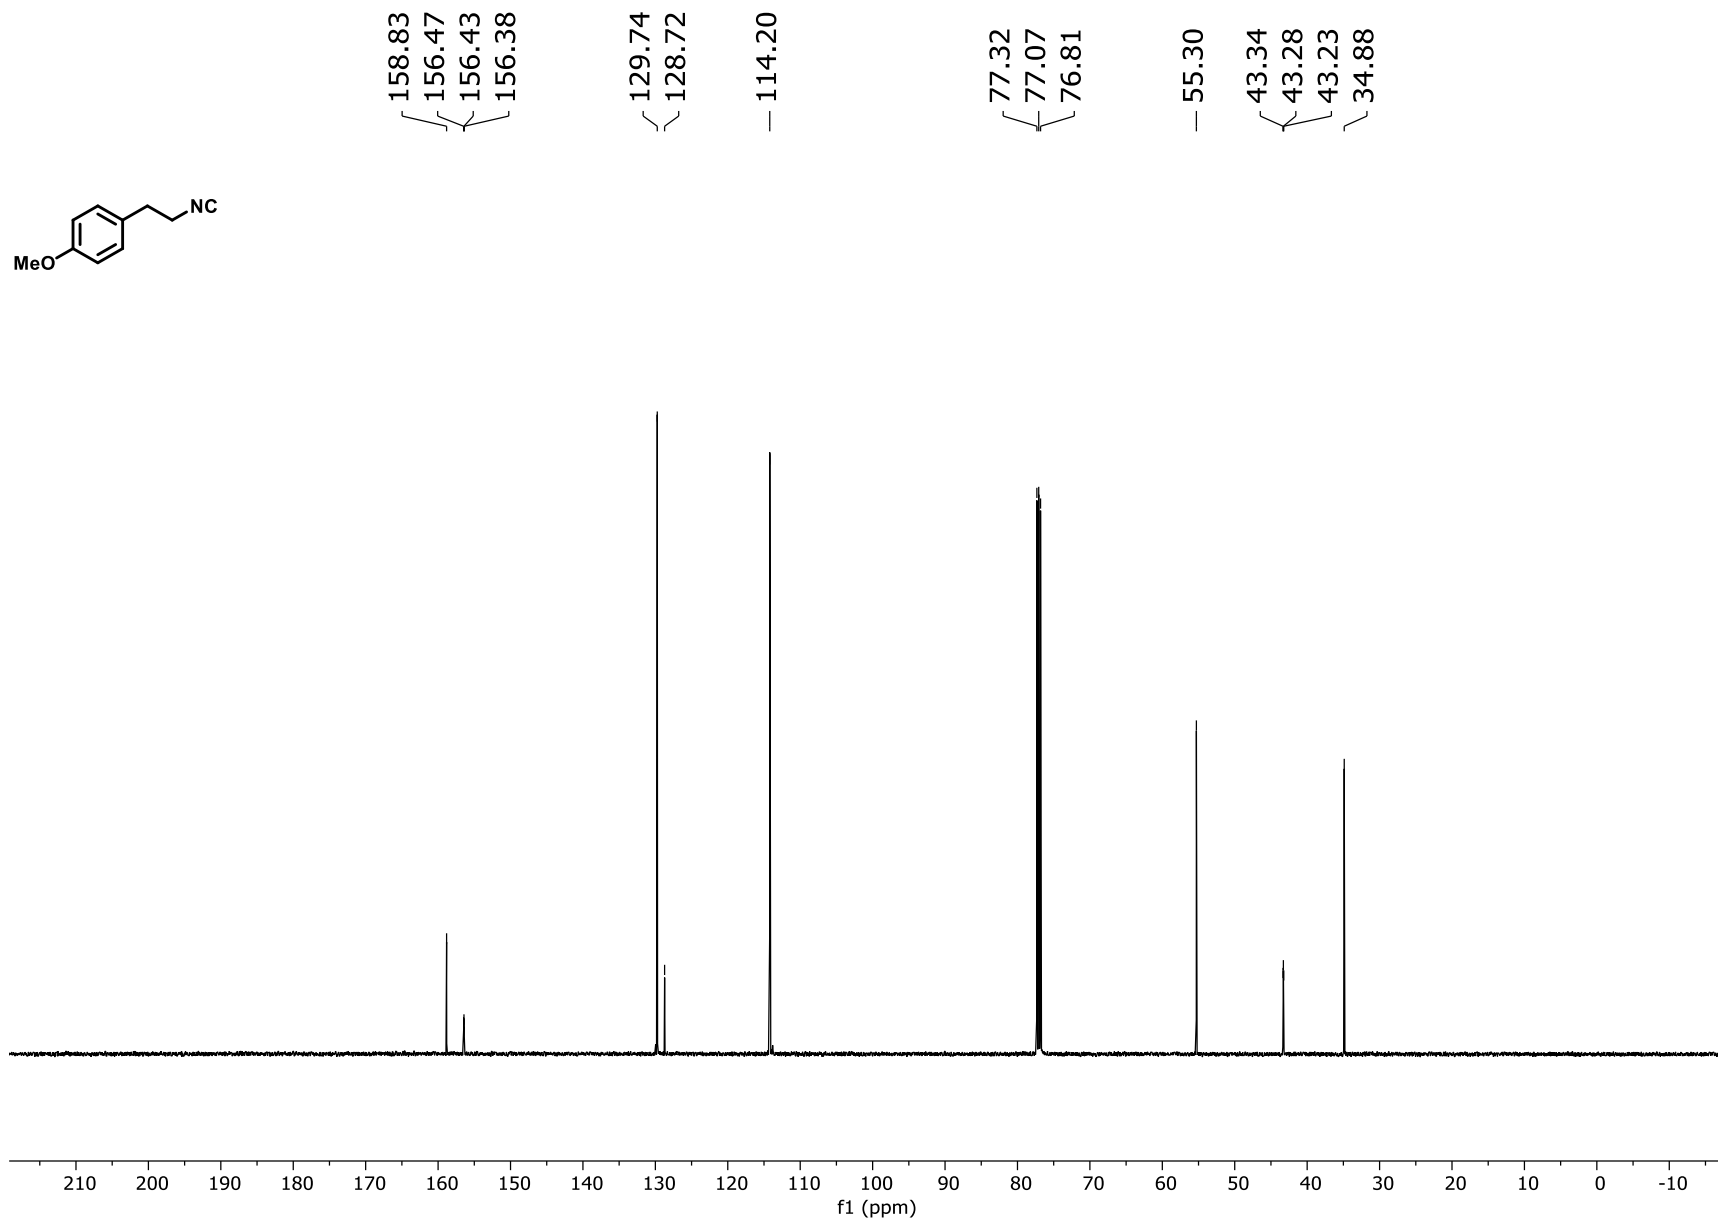

96. Compound 27c <sup>1</sup>H NMR

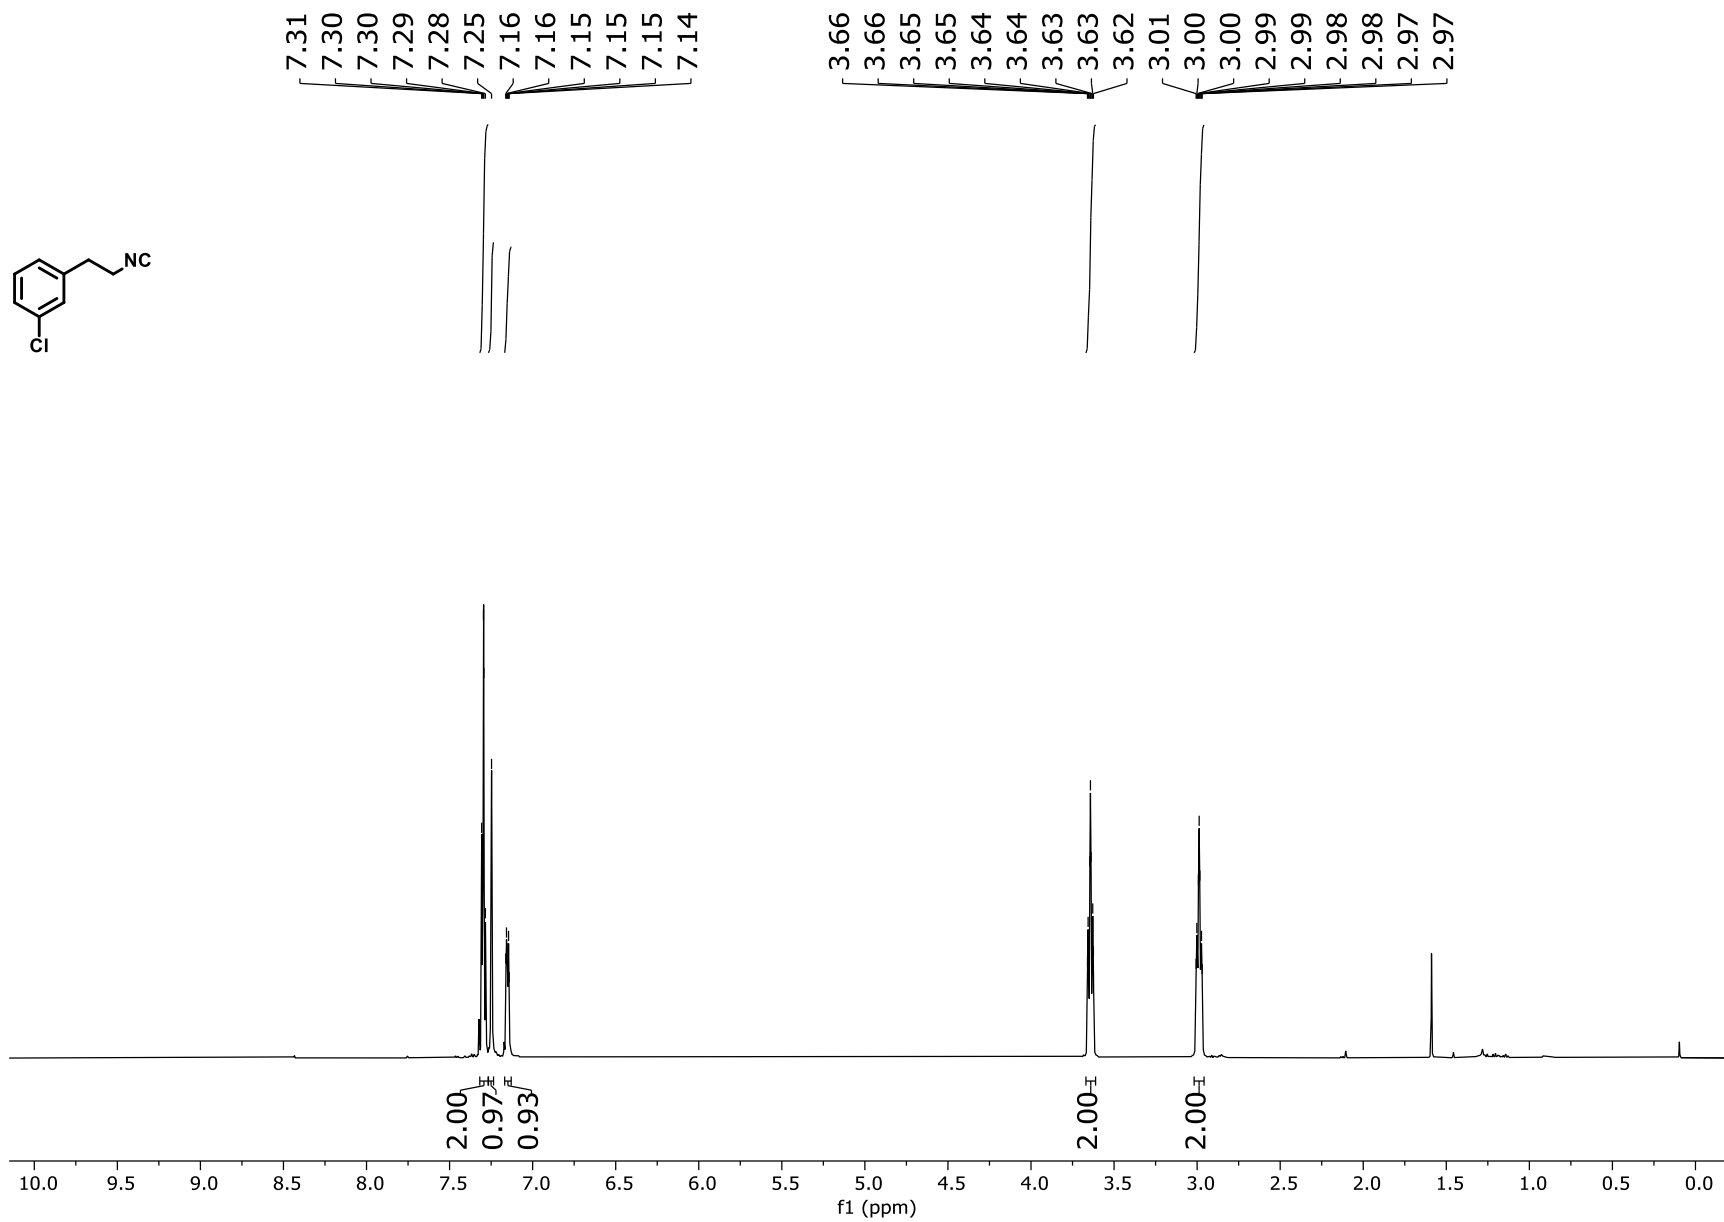

97. Compound **27c** <sup>13</sup>C NMR

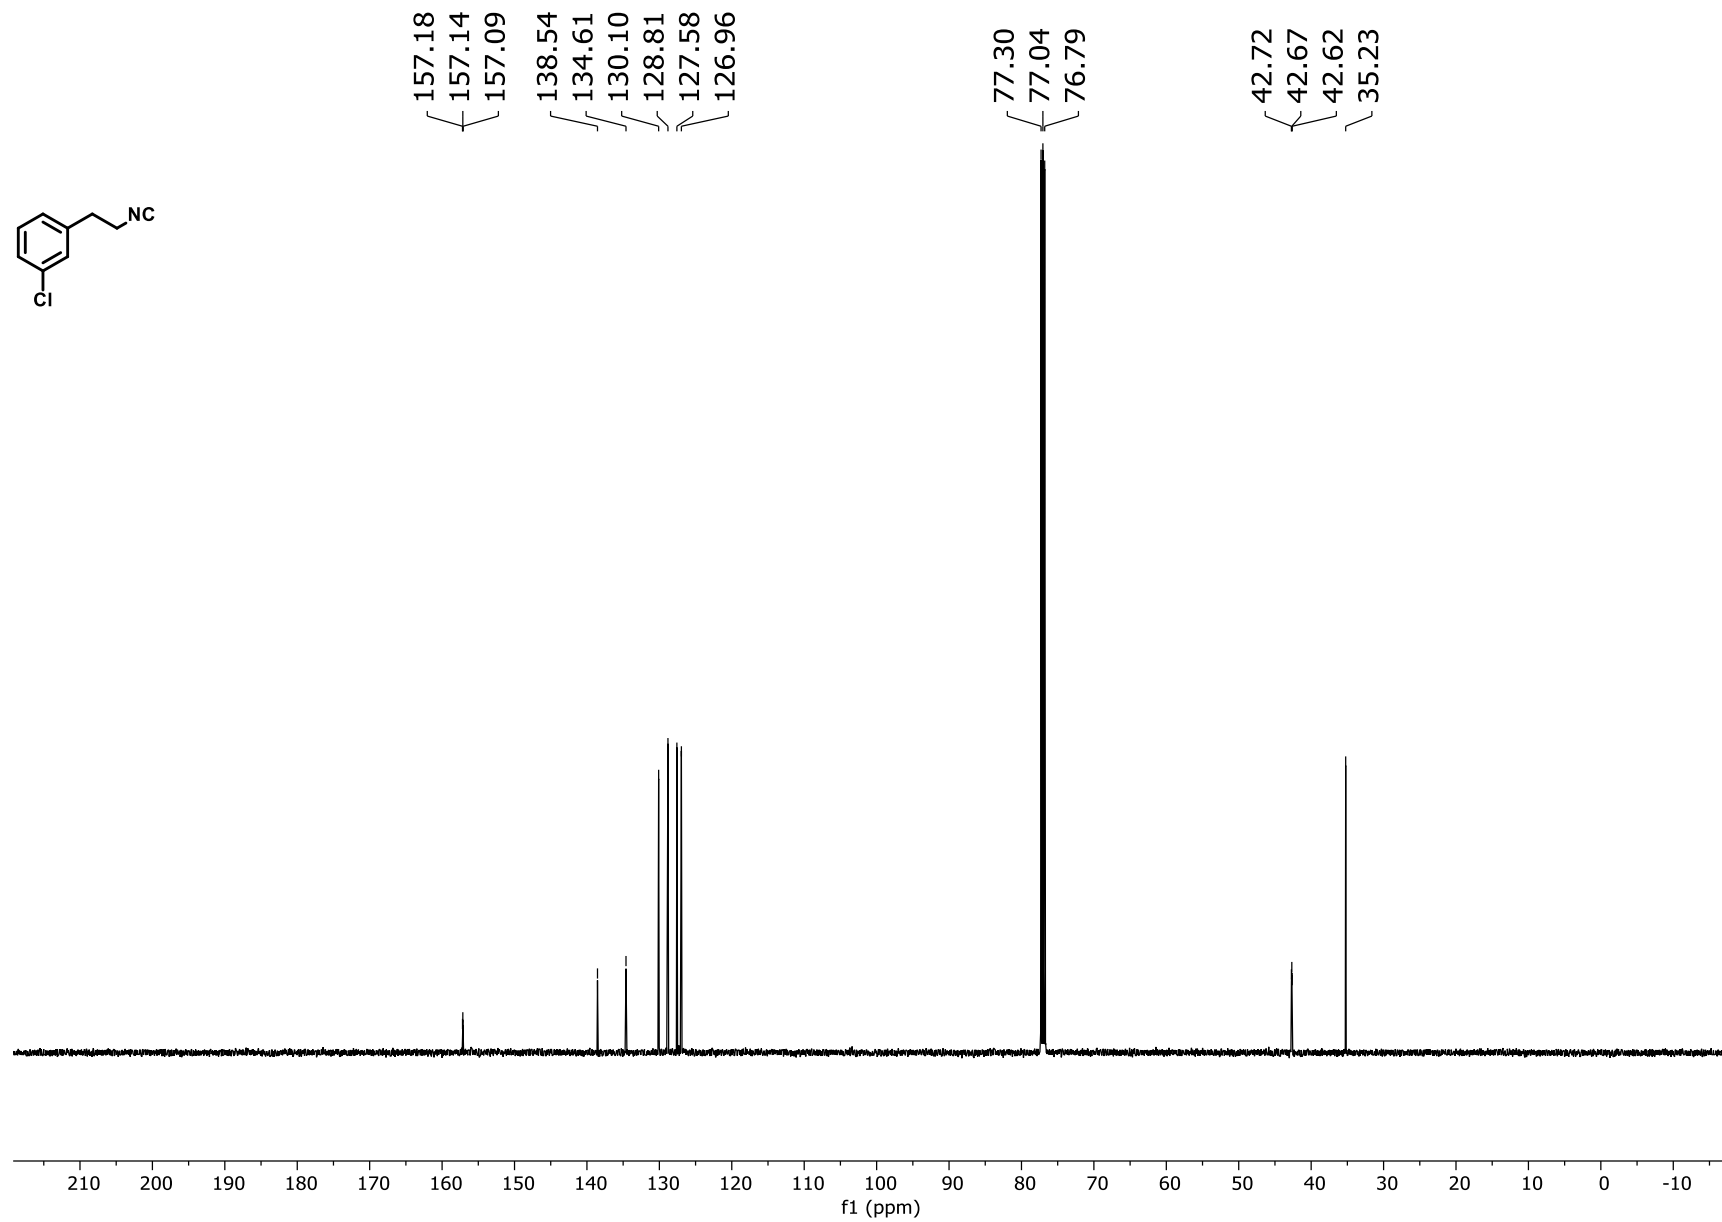

98. Compound **27d** <sup>1</sup>H NMR

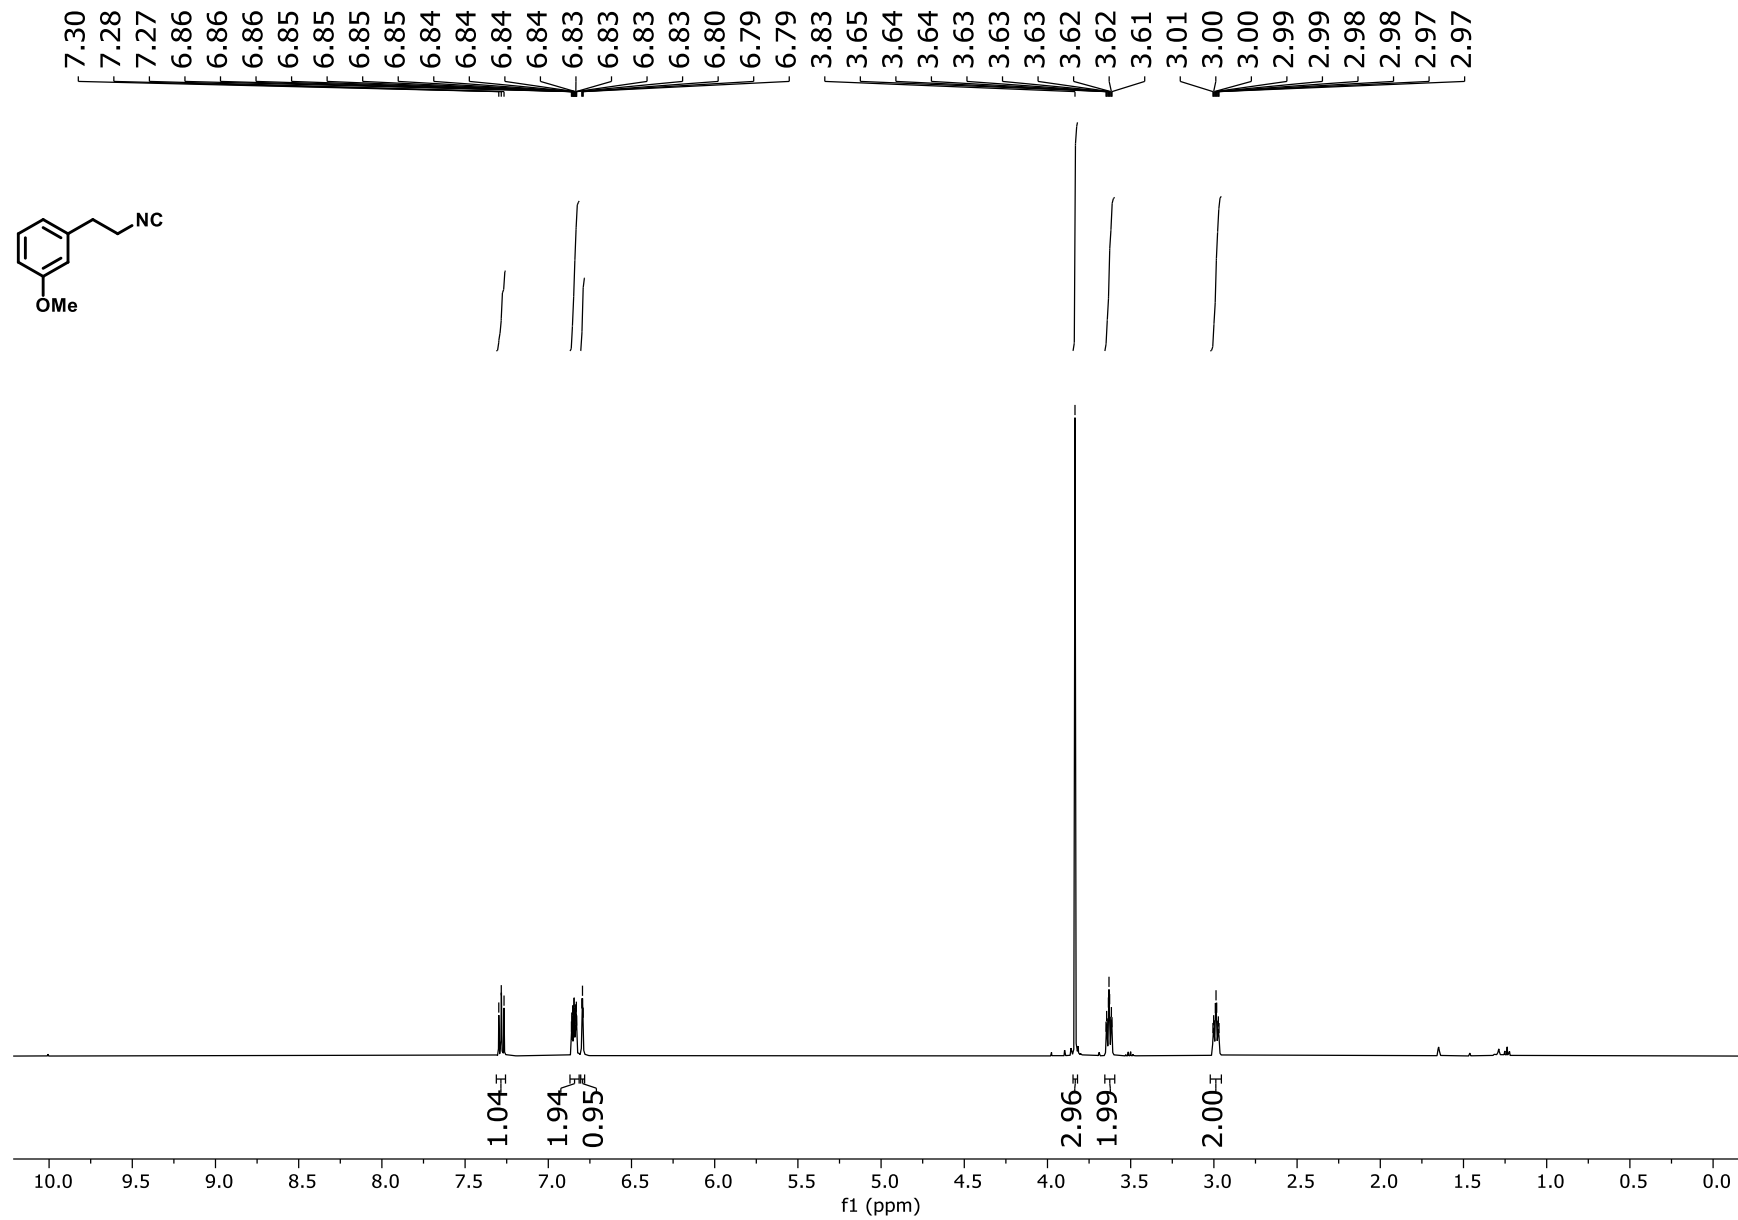



99. Compound **27d** <sup>13</sup>C NMR

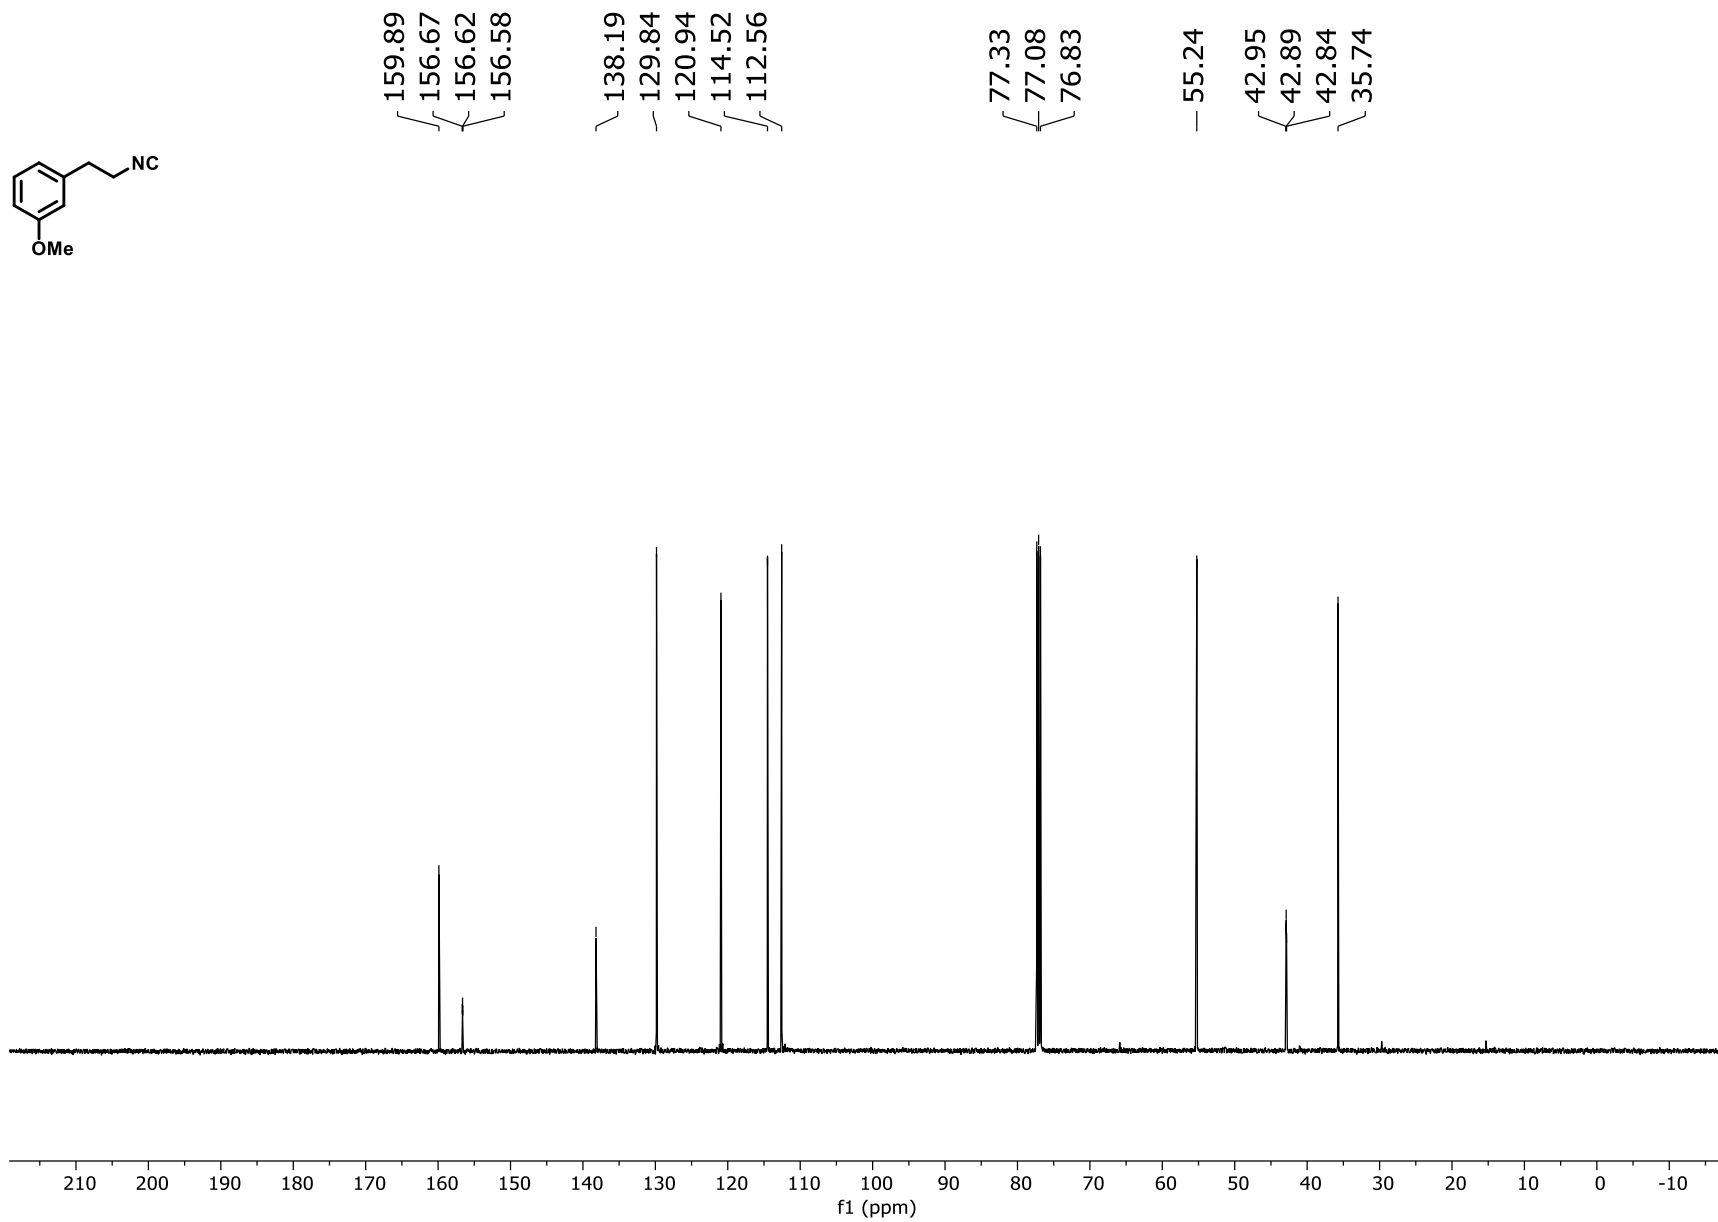

100. Compound 27e <sup>1</sup>H NMR

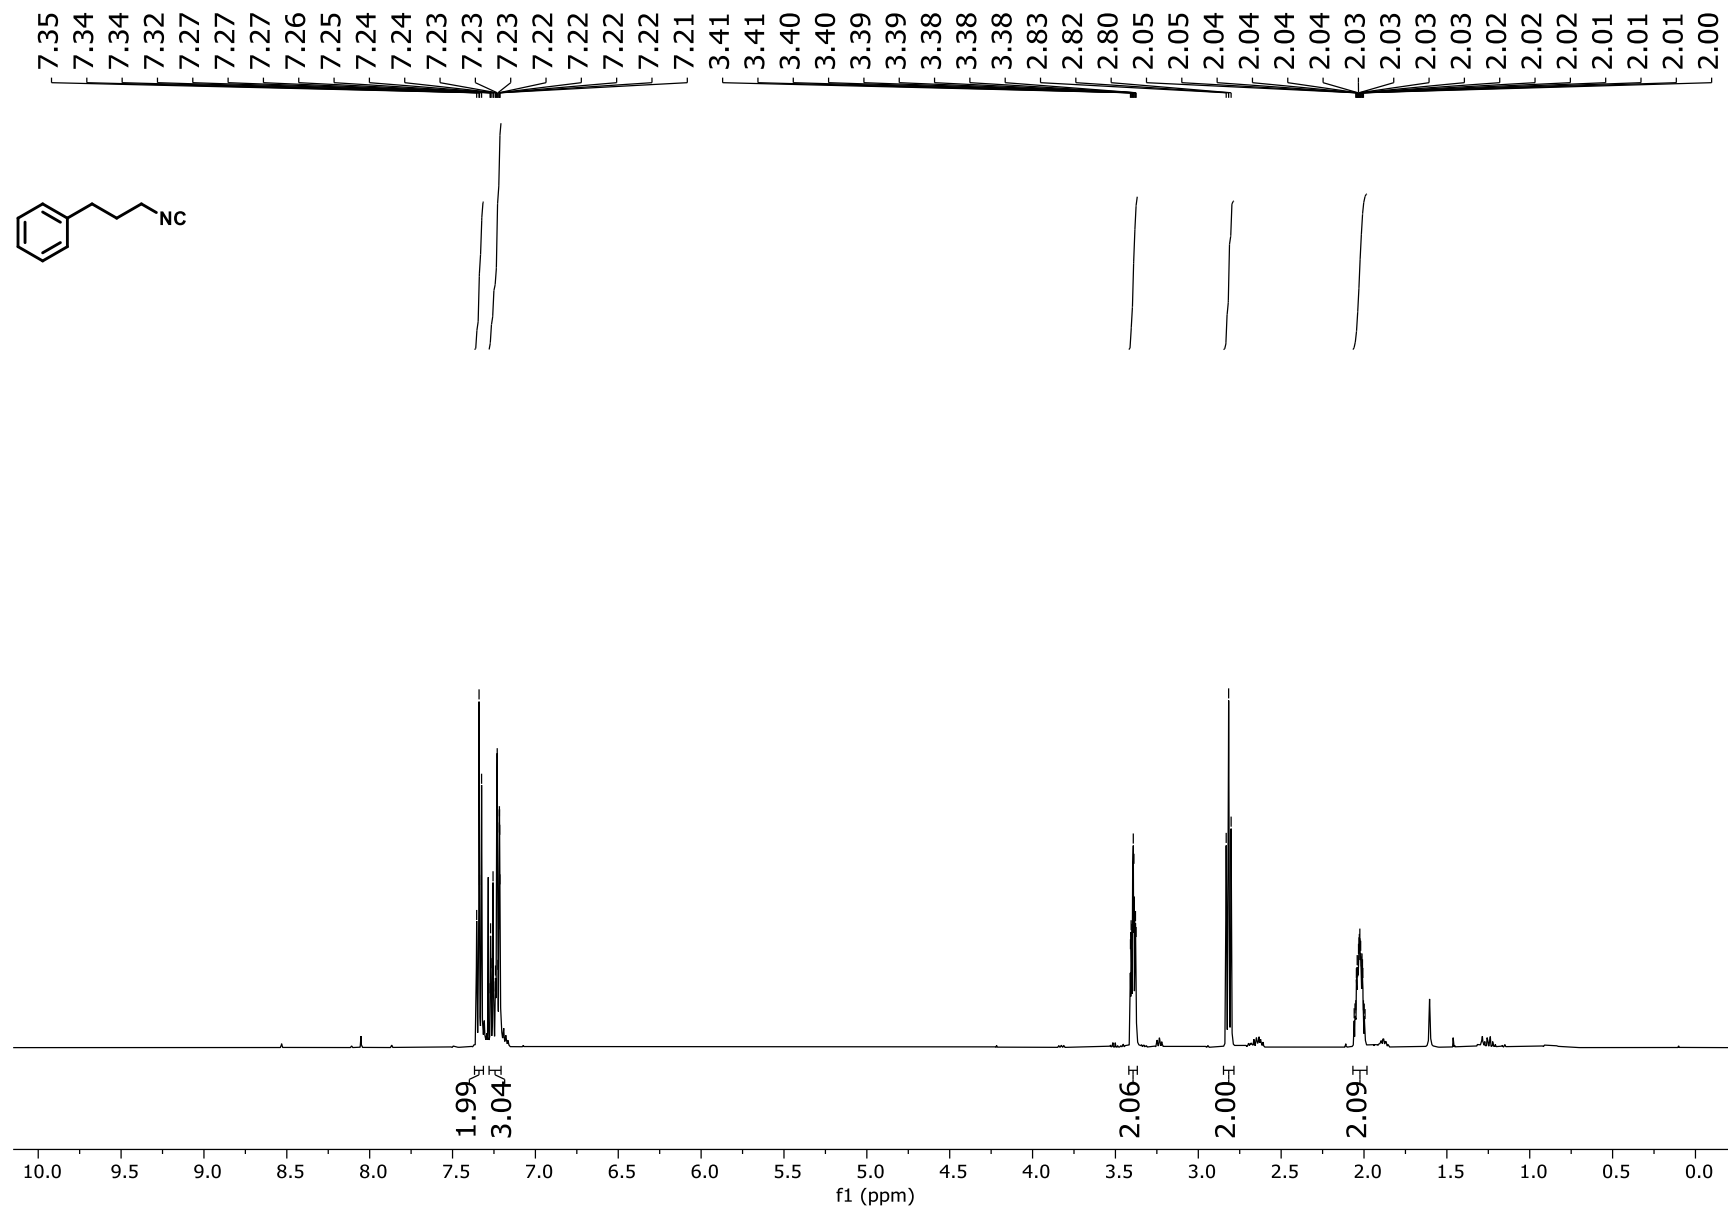

101. Compound 27e <sup>13</sup>C NMR

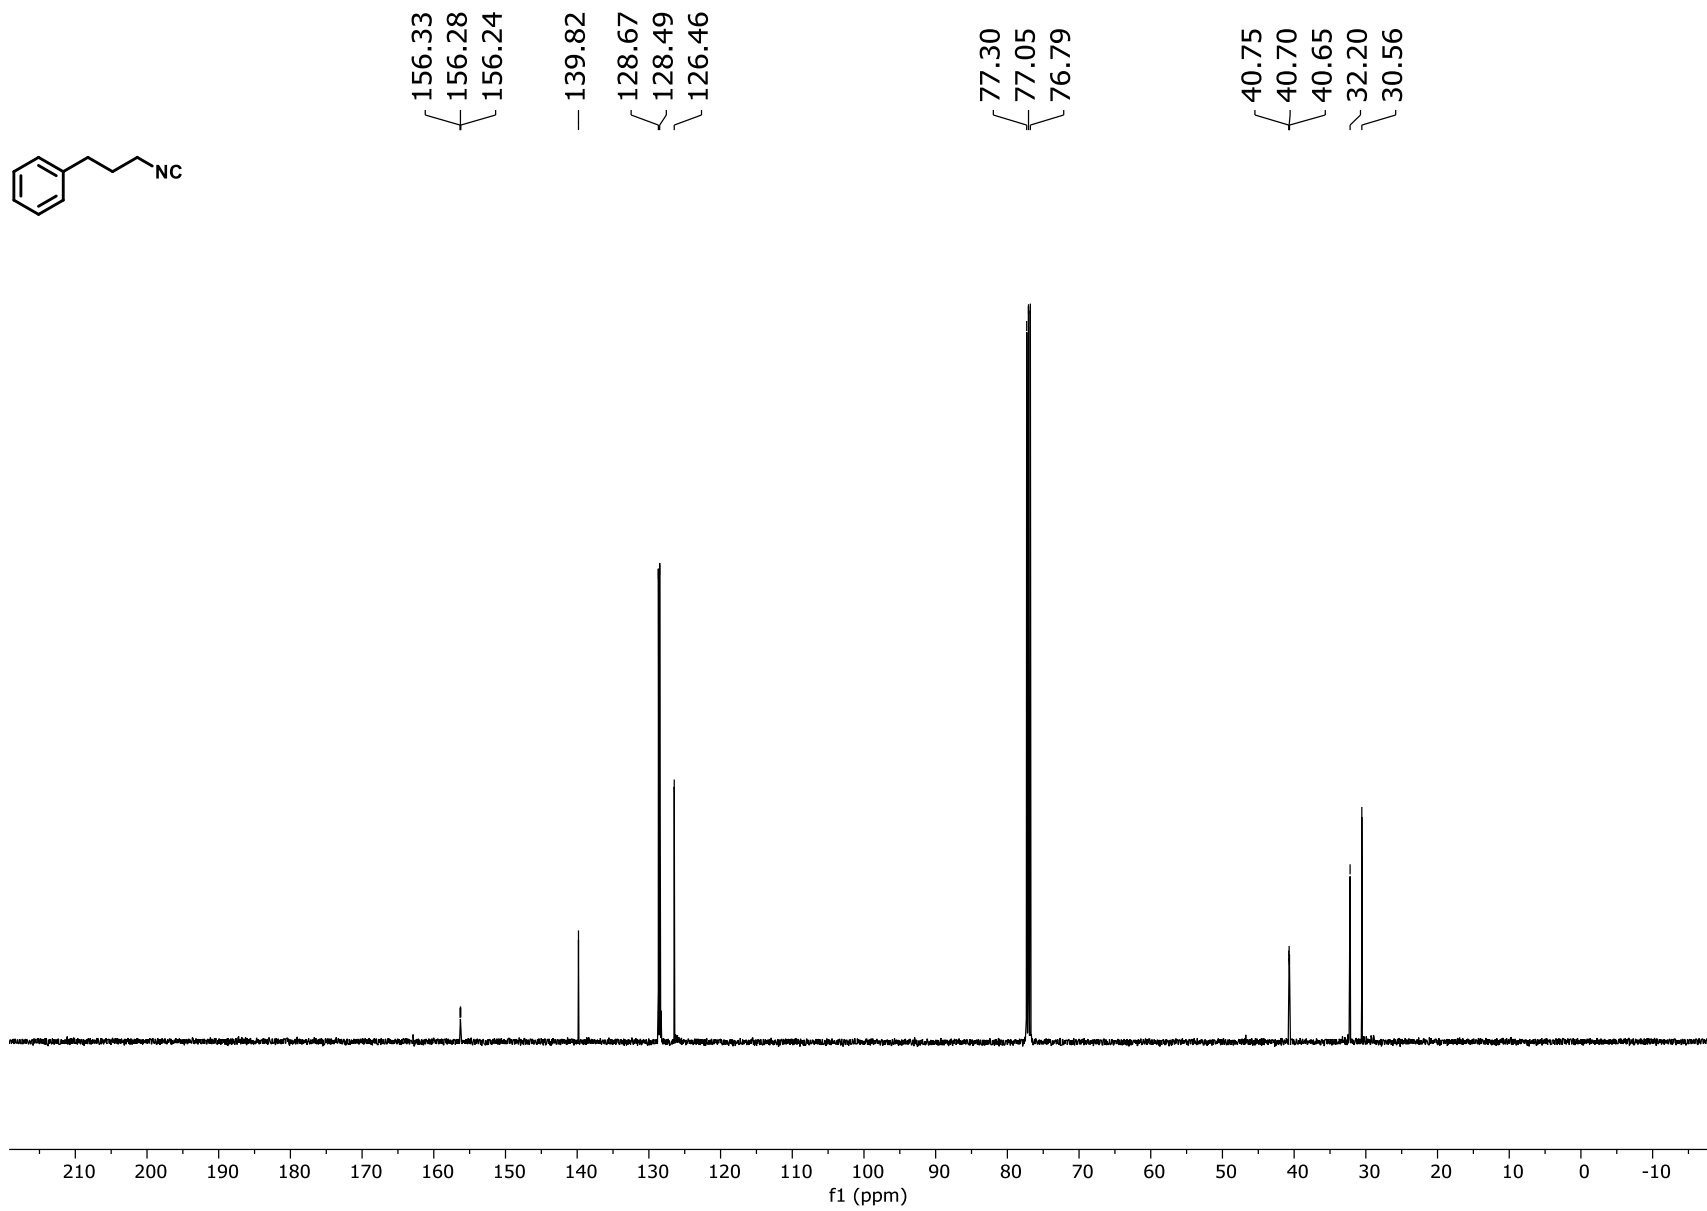

102. Compound 27f <sup>1</sup>H NMR

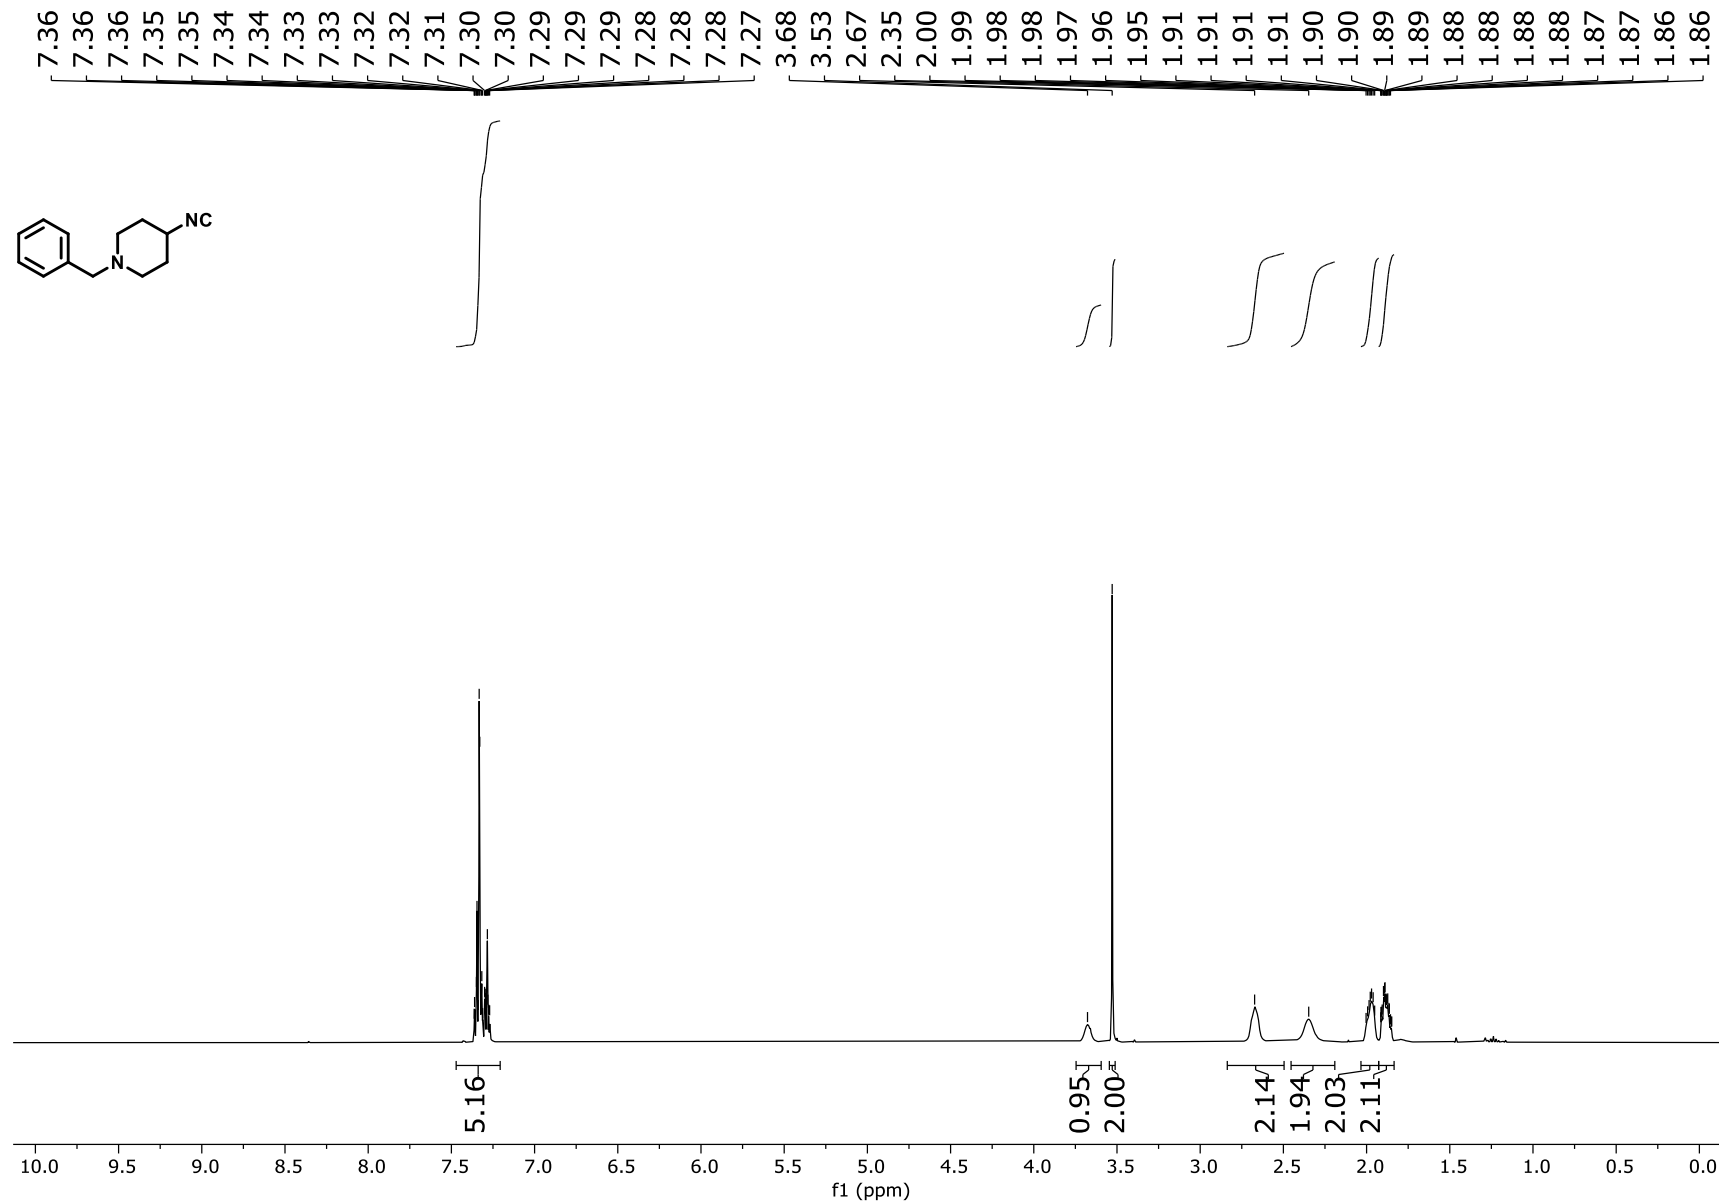

103. Compound 27f <sup>13</sup>C NMR

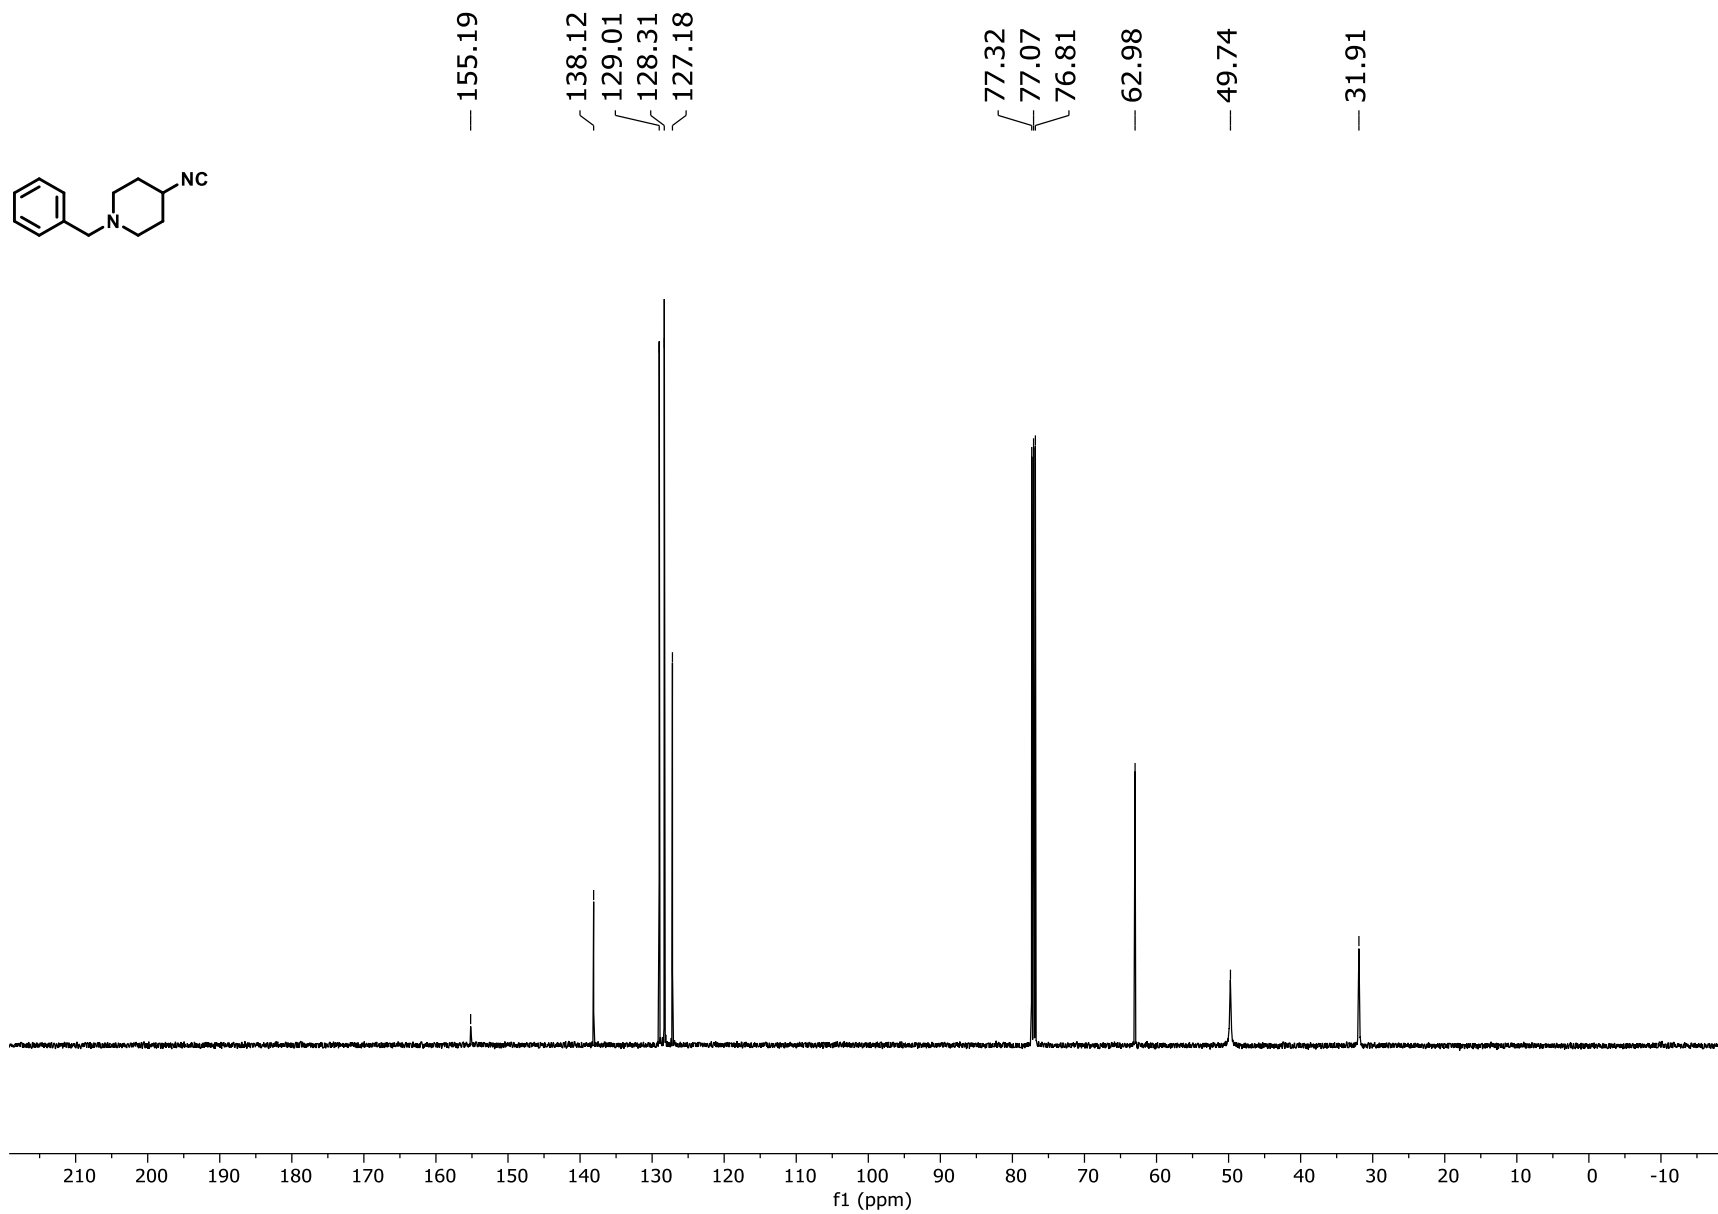

104. Compound 27g <sup>1</sup>H NMR

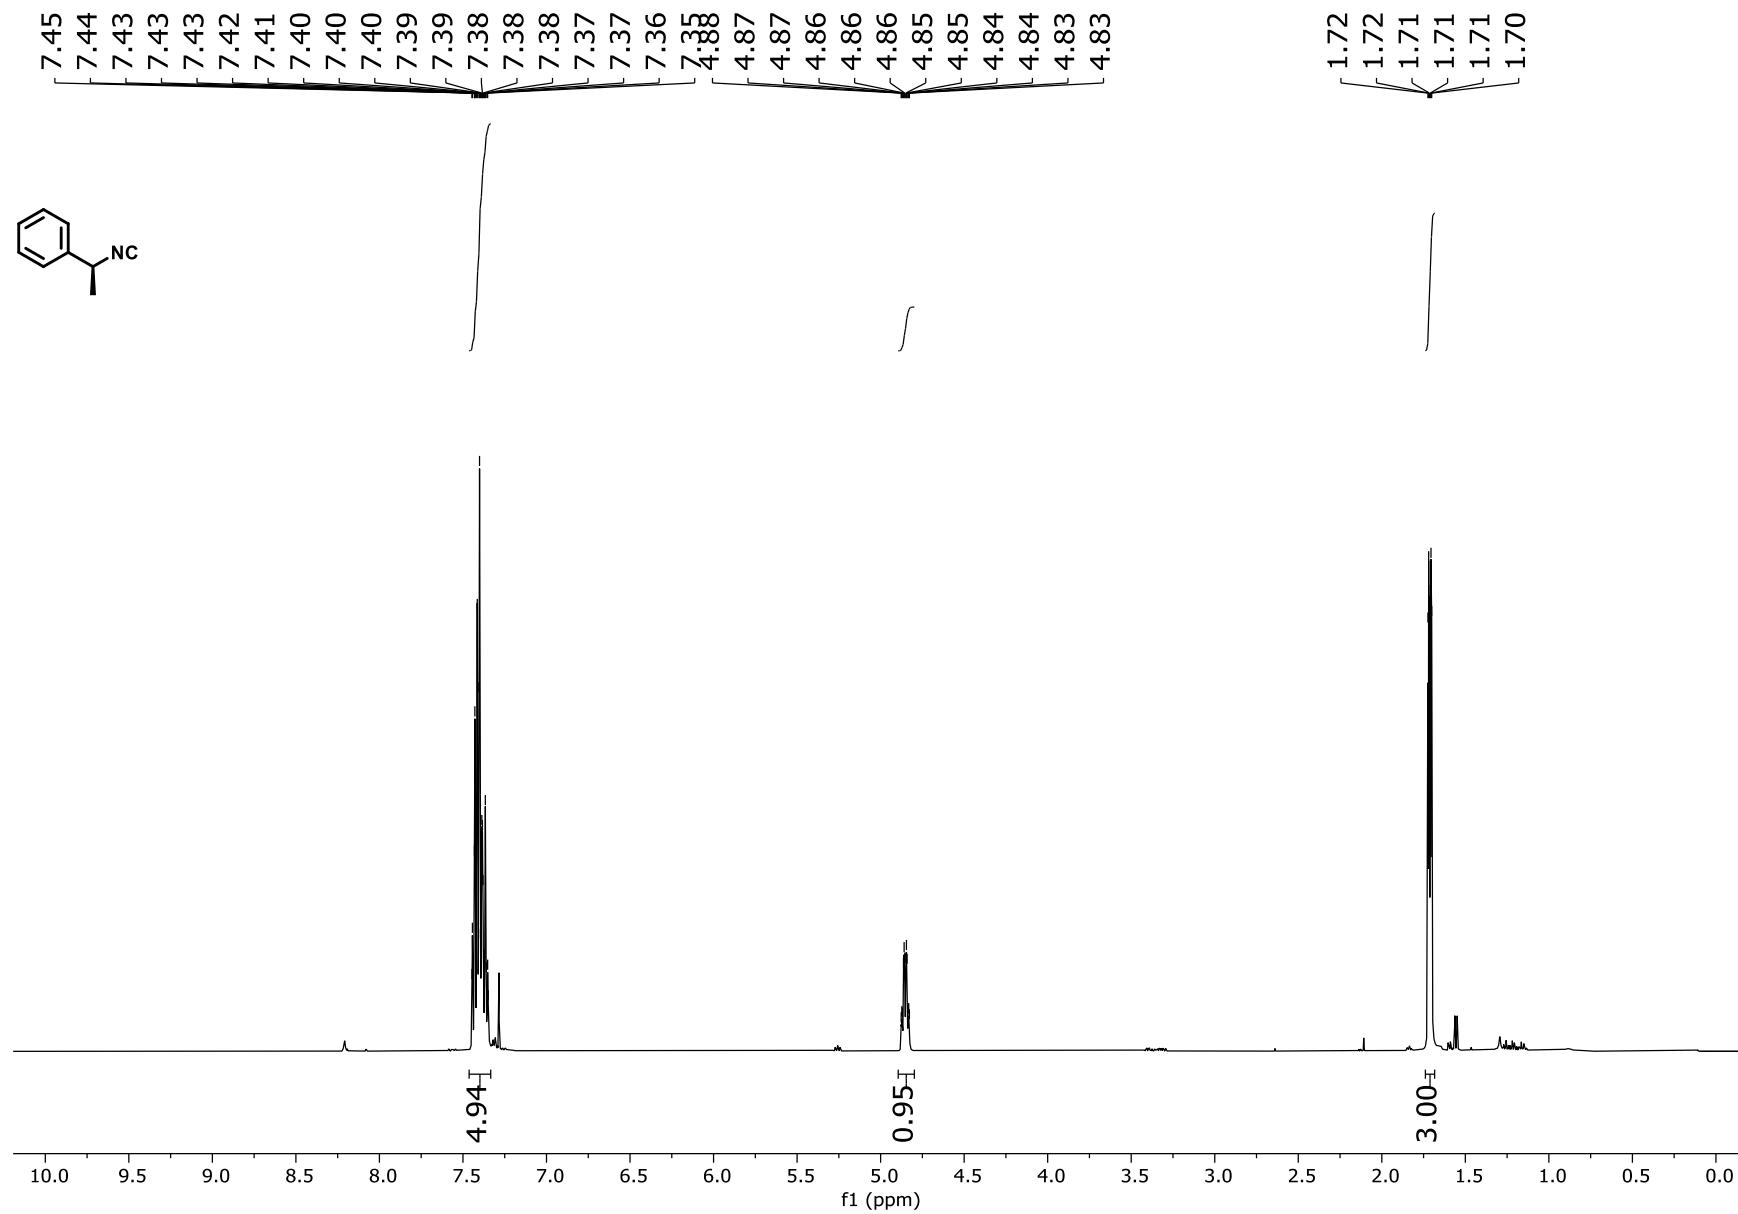

105. Compound 27g <sup>13</sup>C NMR

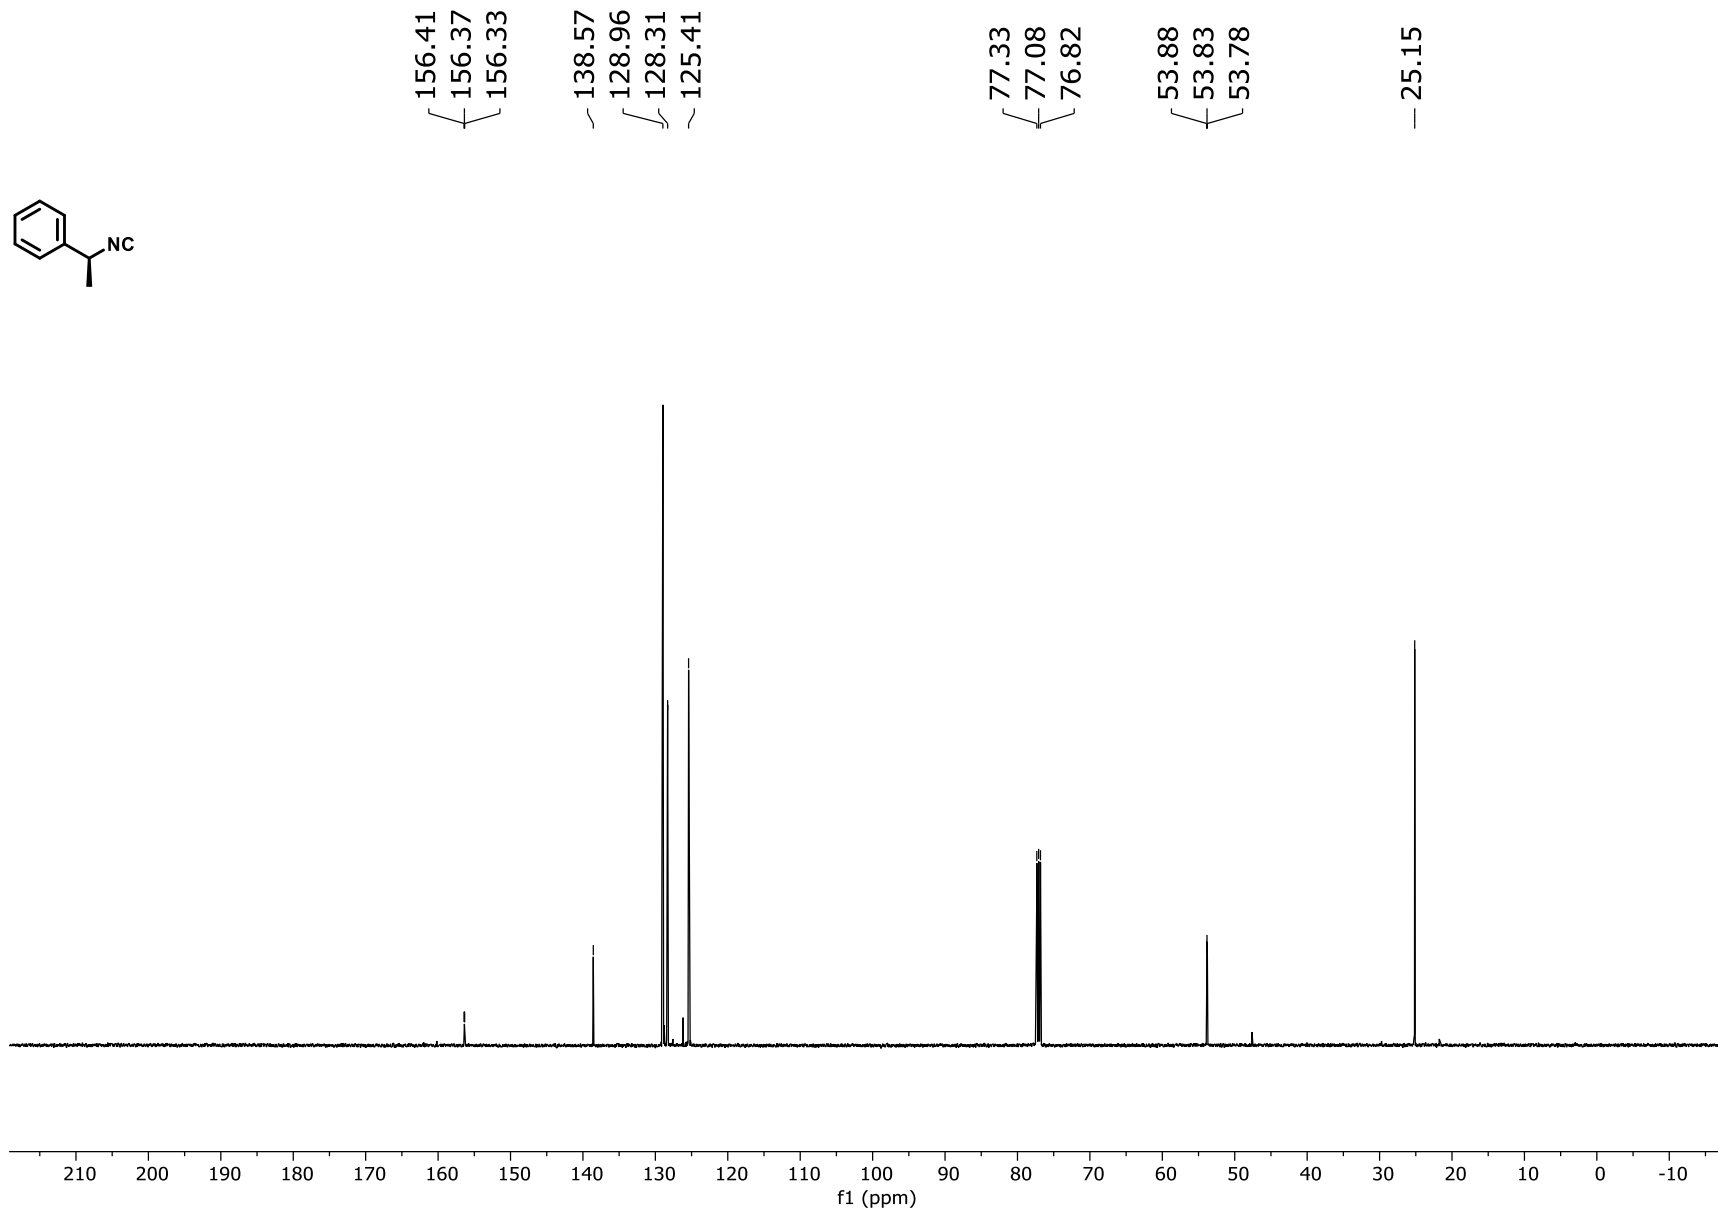

106. Compound 28b <sup>1</sup>H NMR

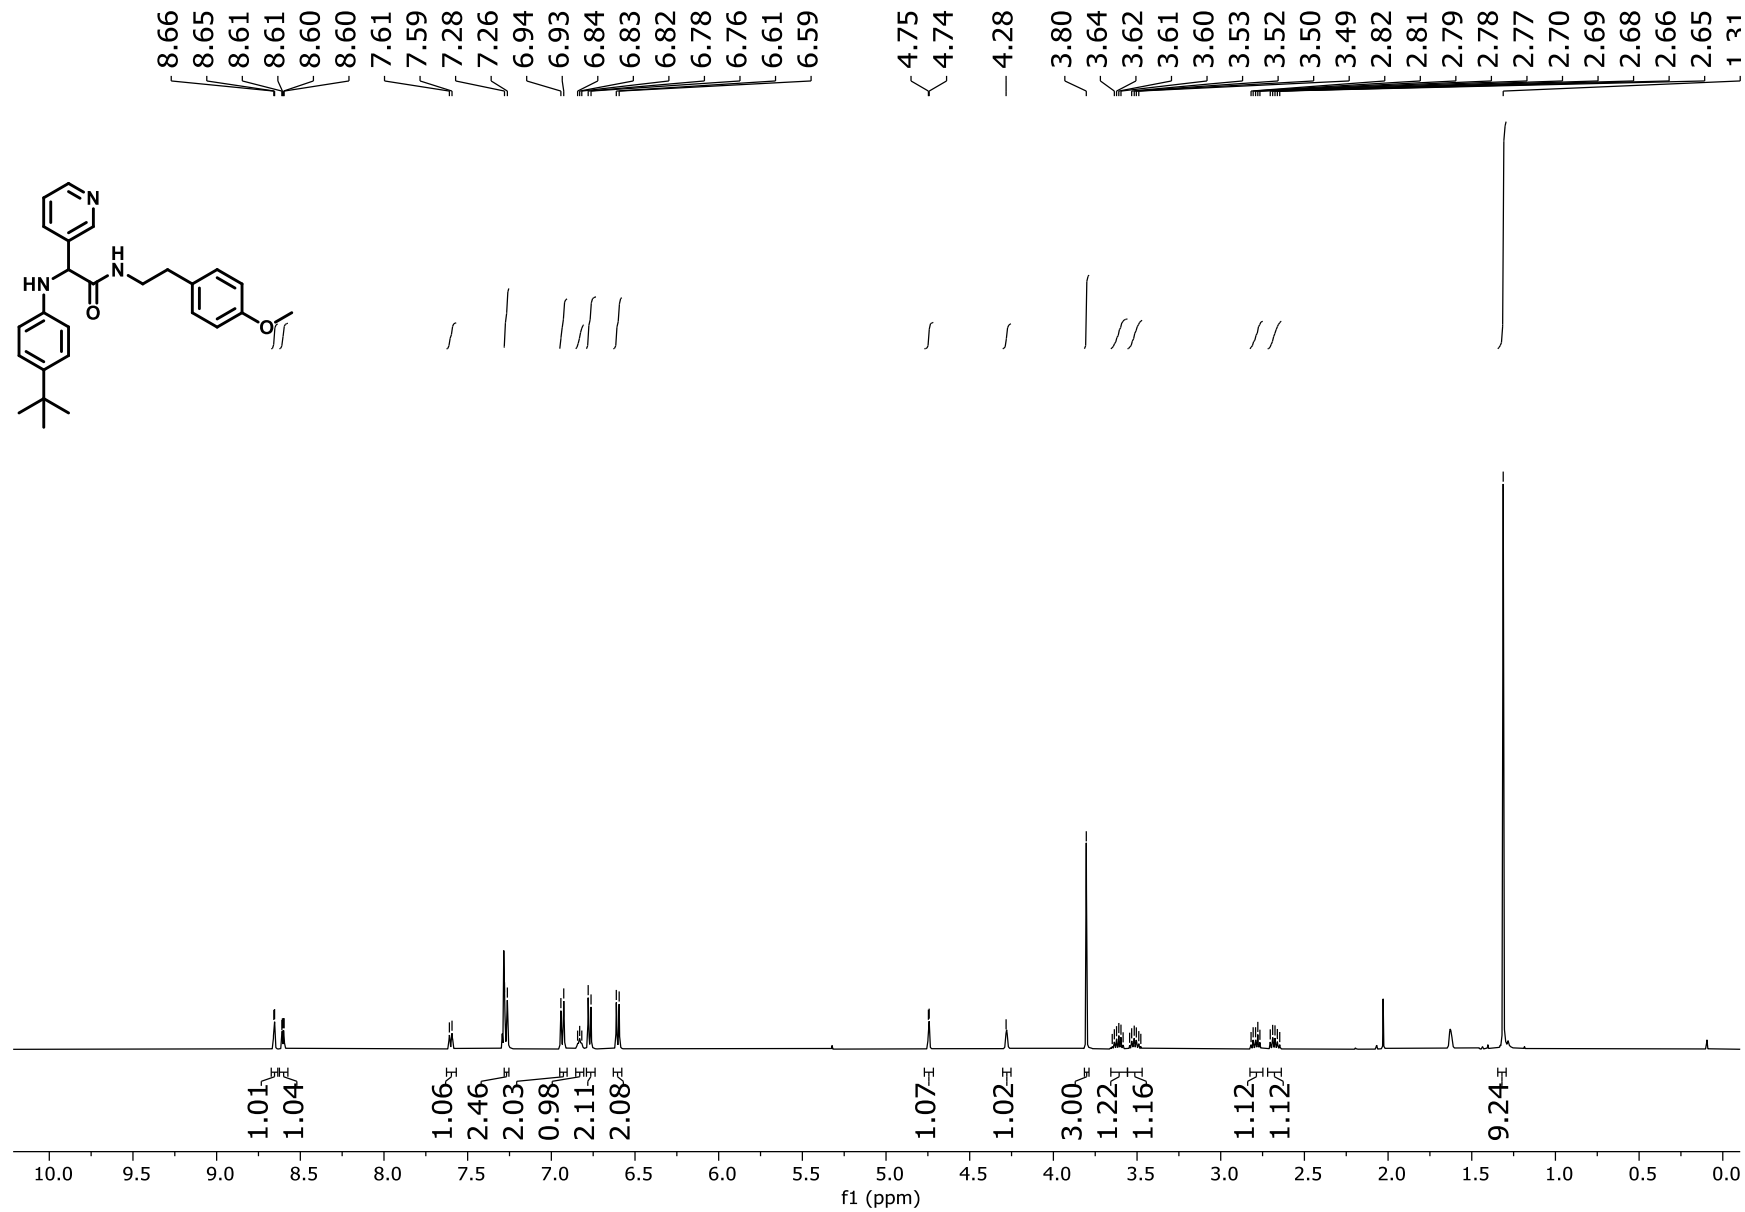



107. Compound **28b** <sup>13</sup>C NMR

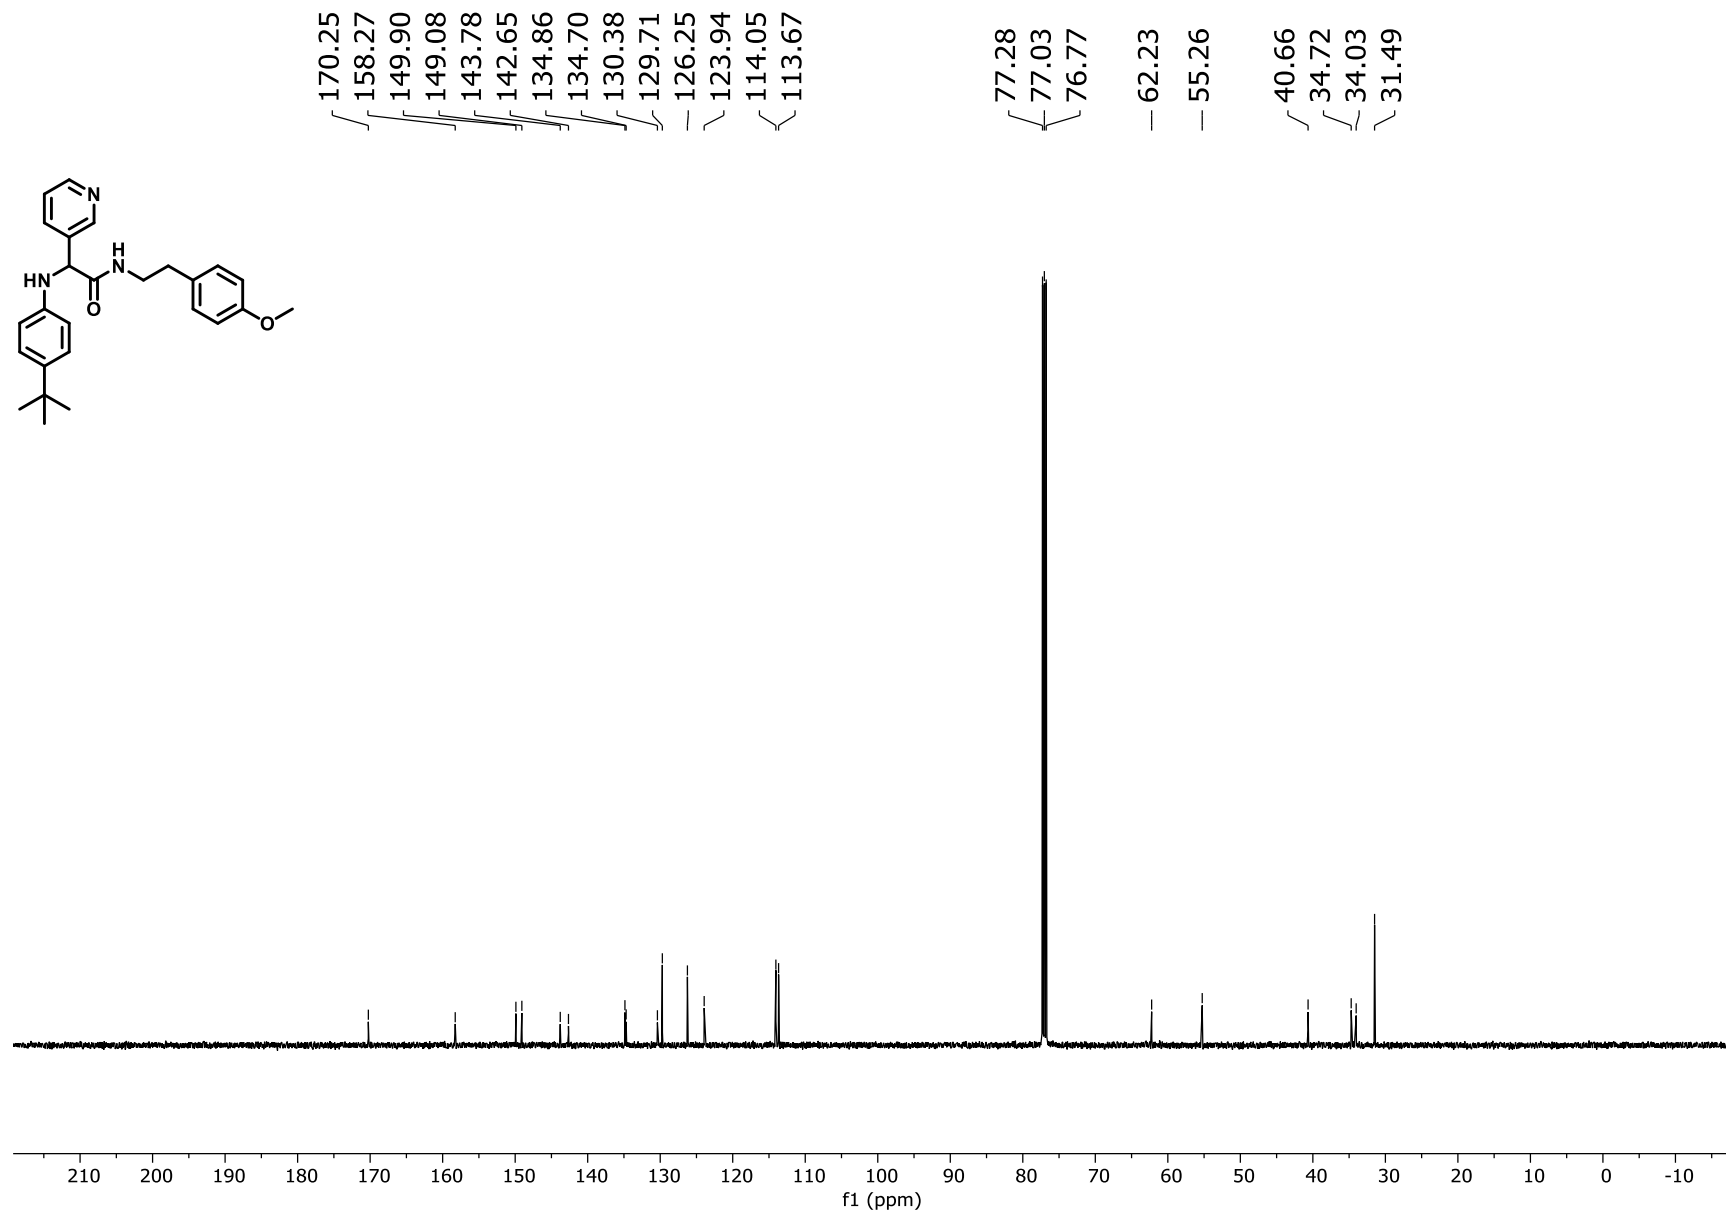

108. Compound 28c <sup>1</sup>H NMR

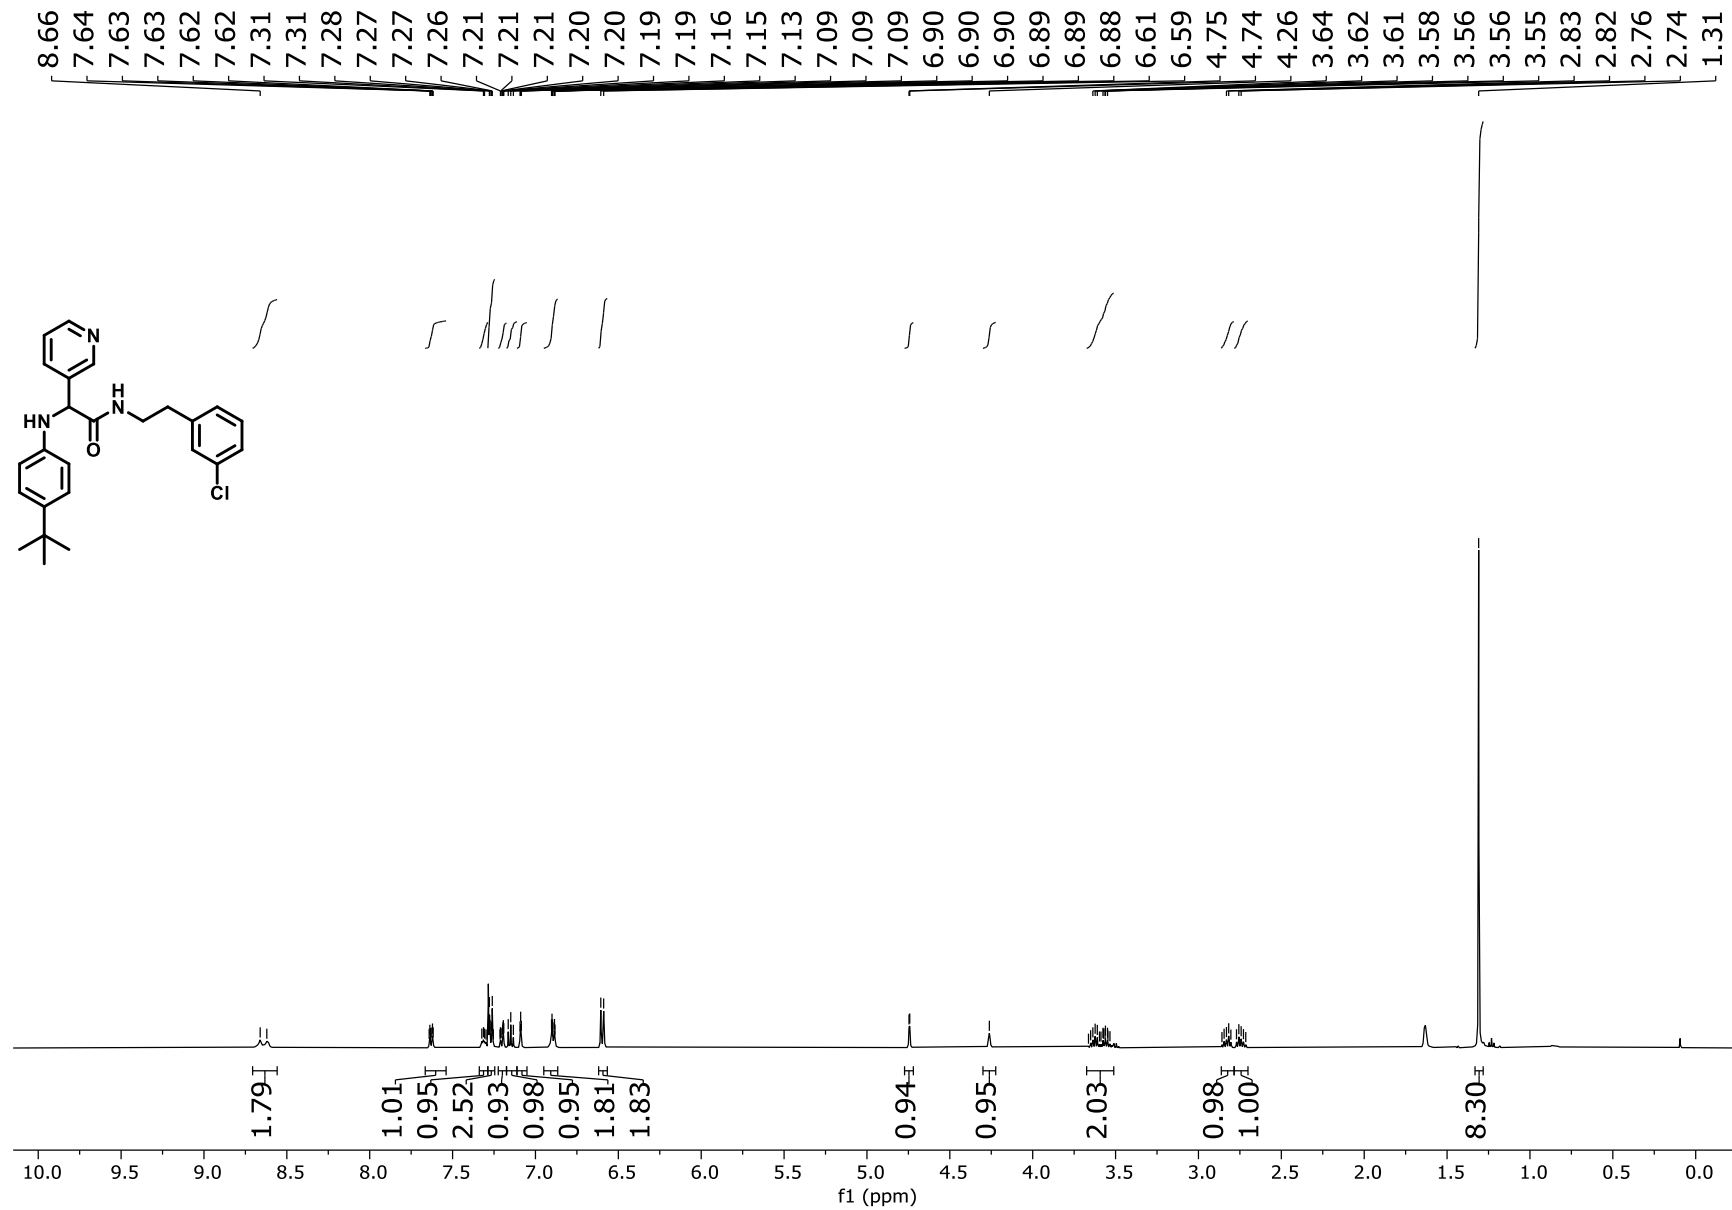

109. Compound 28c <sup>13</sup>C NMR

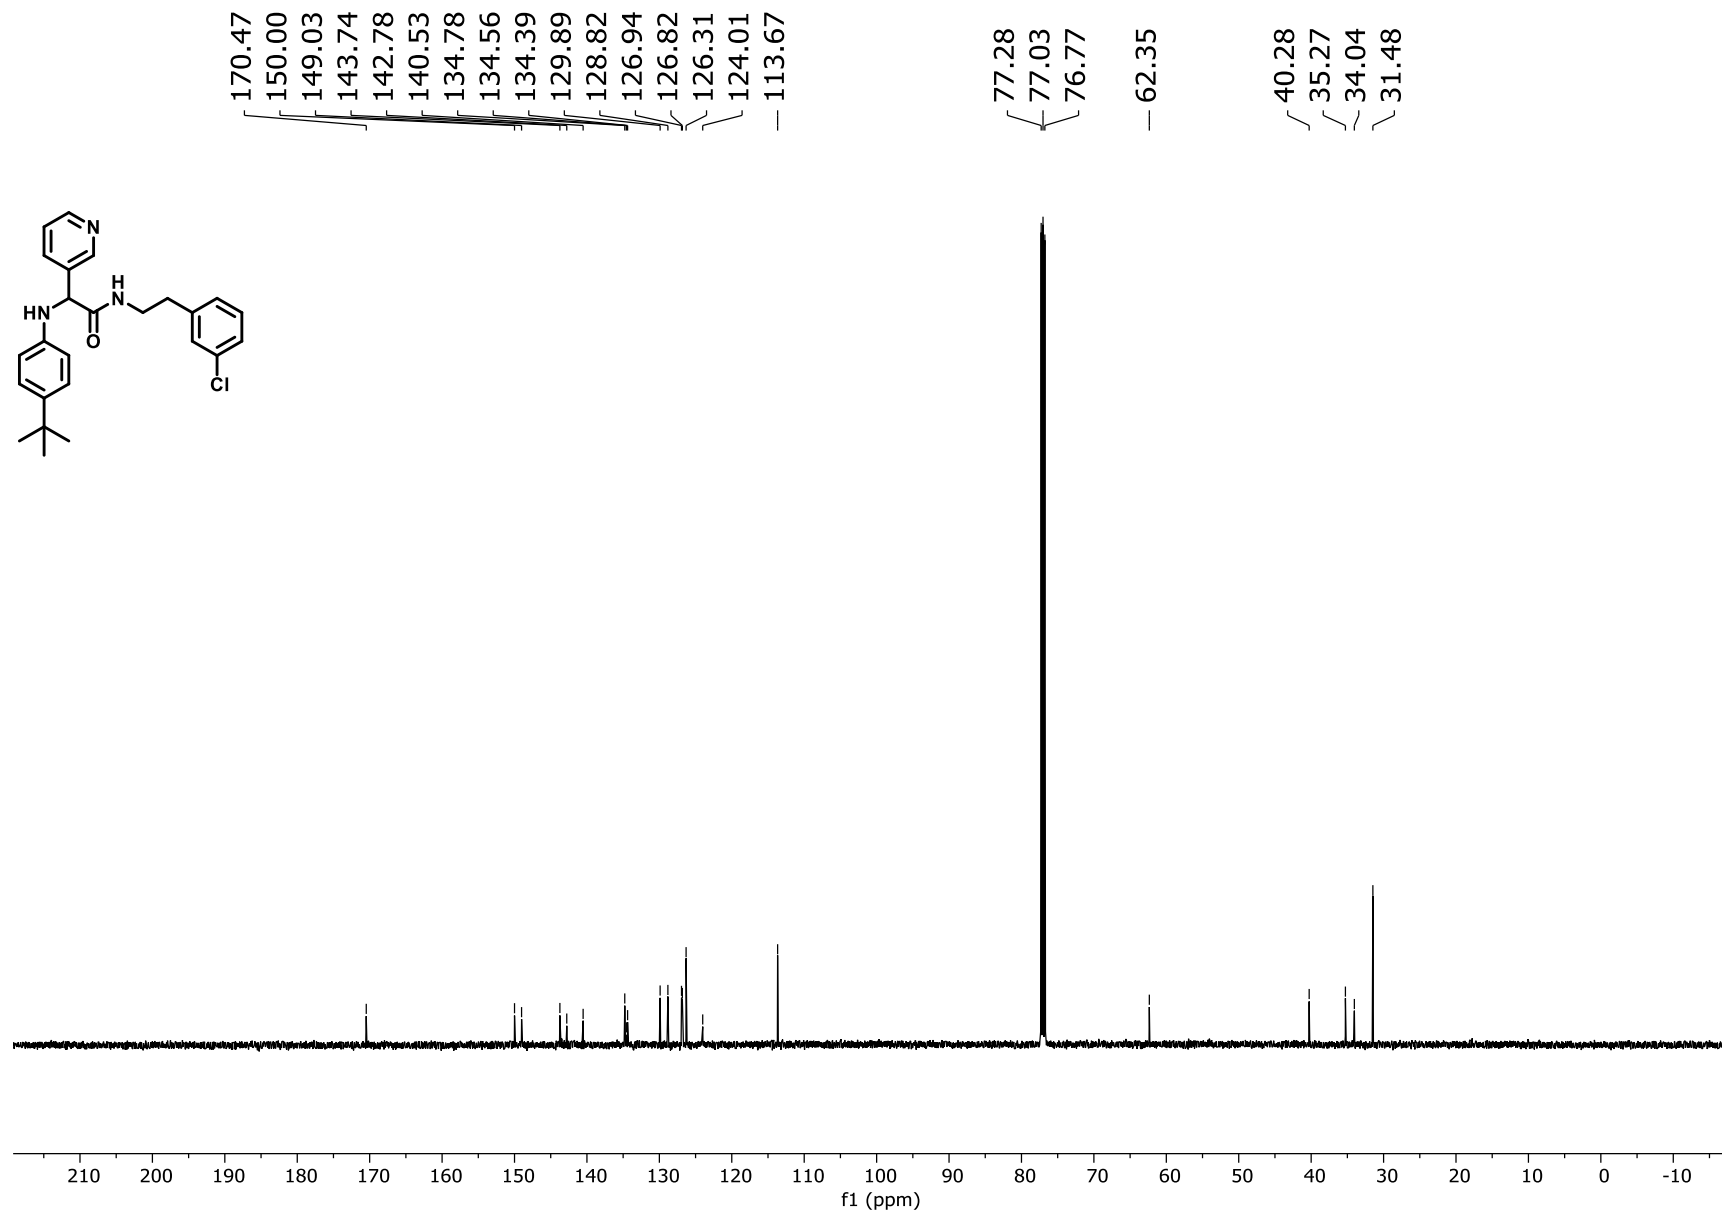

110. Compound 28d <sup>1</sup>H NMR

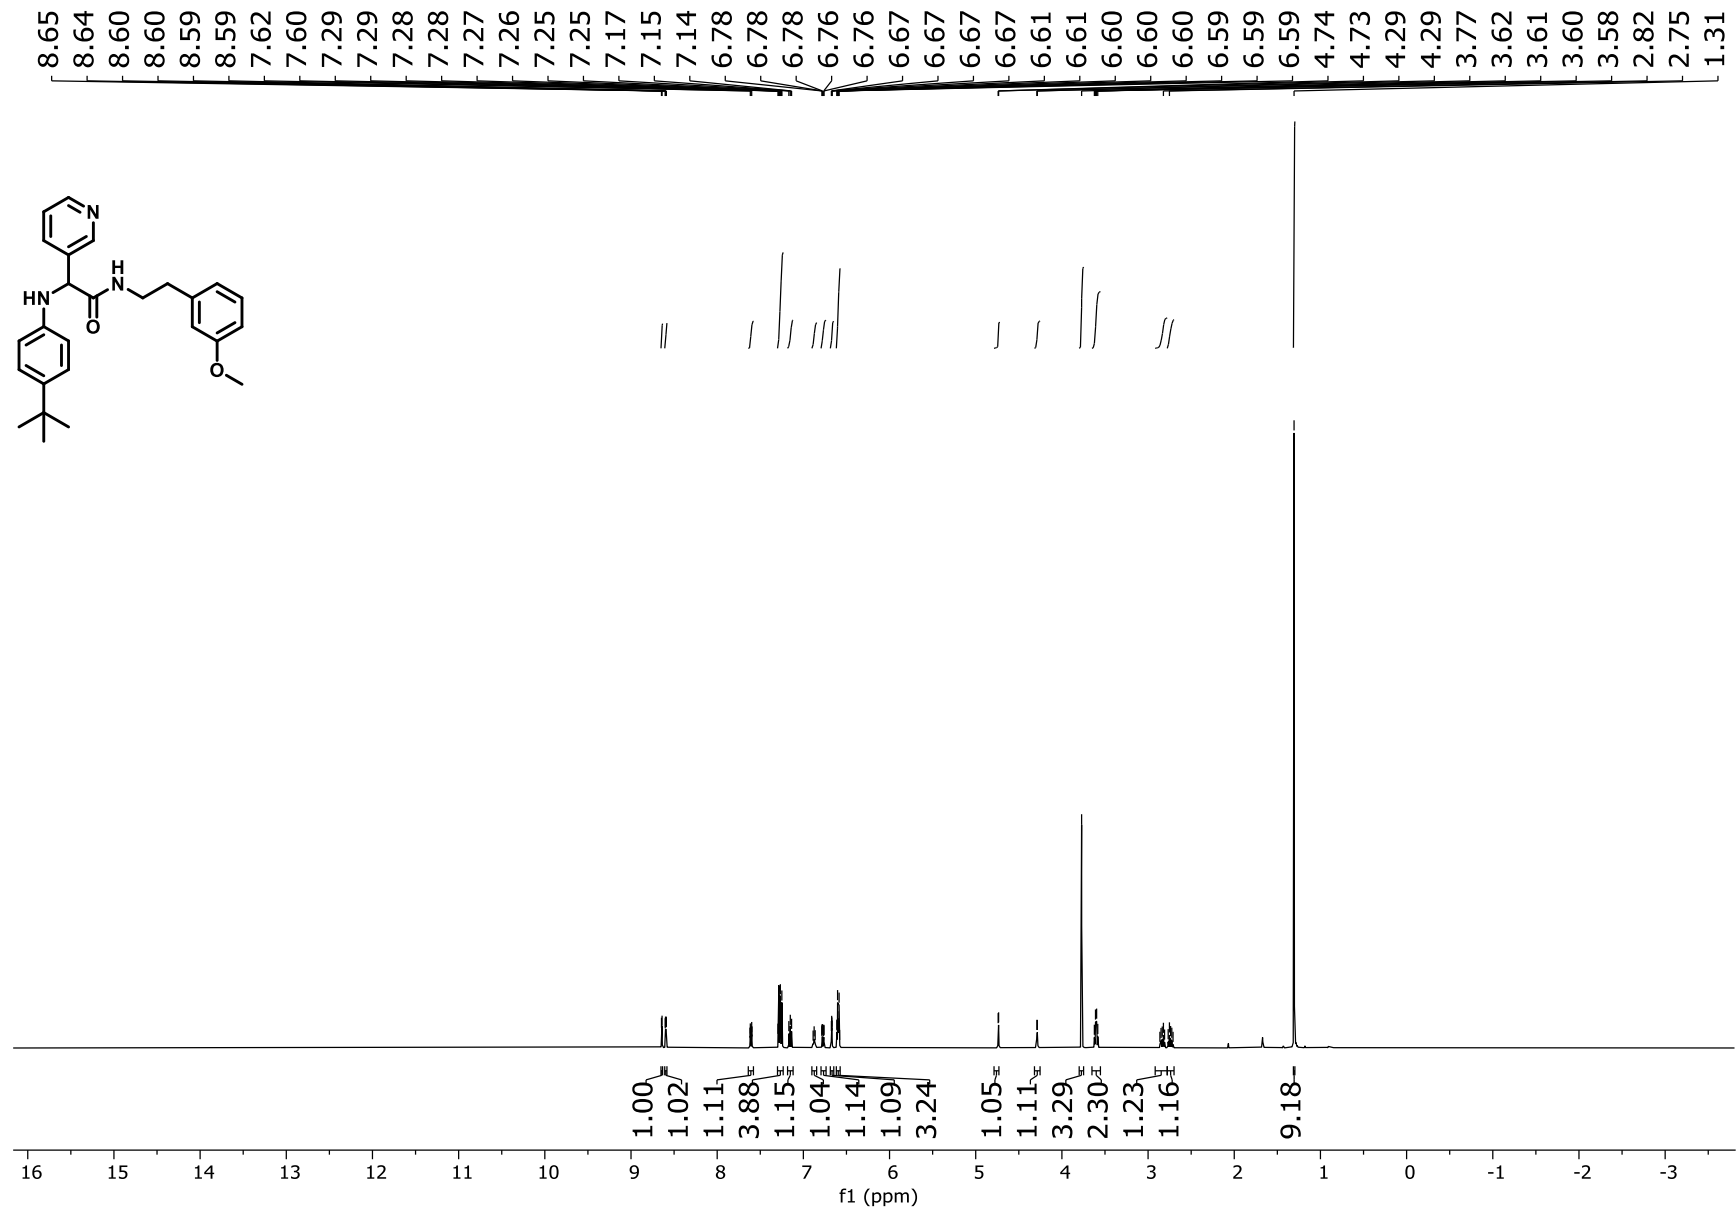

111. Compound 28d <sup>13</sup>C NMR

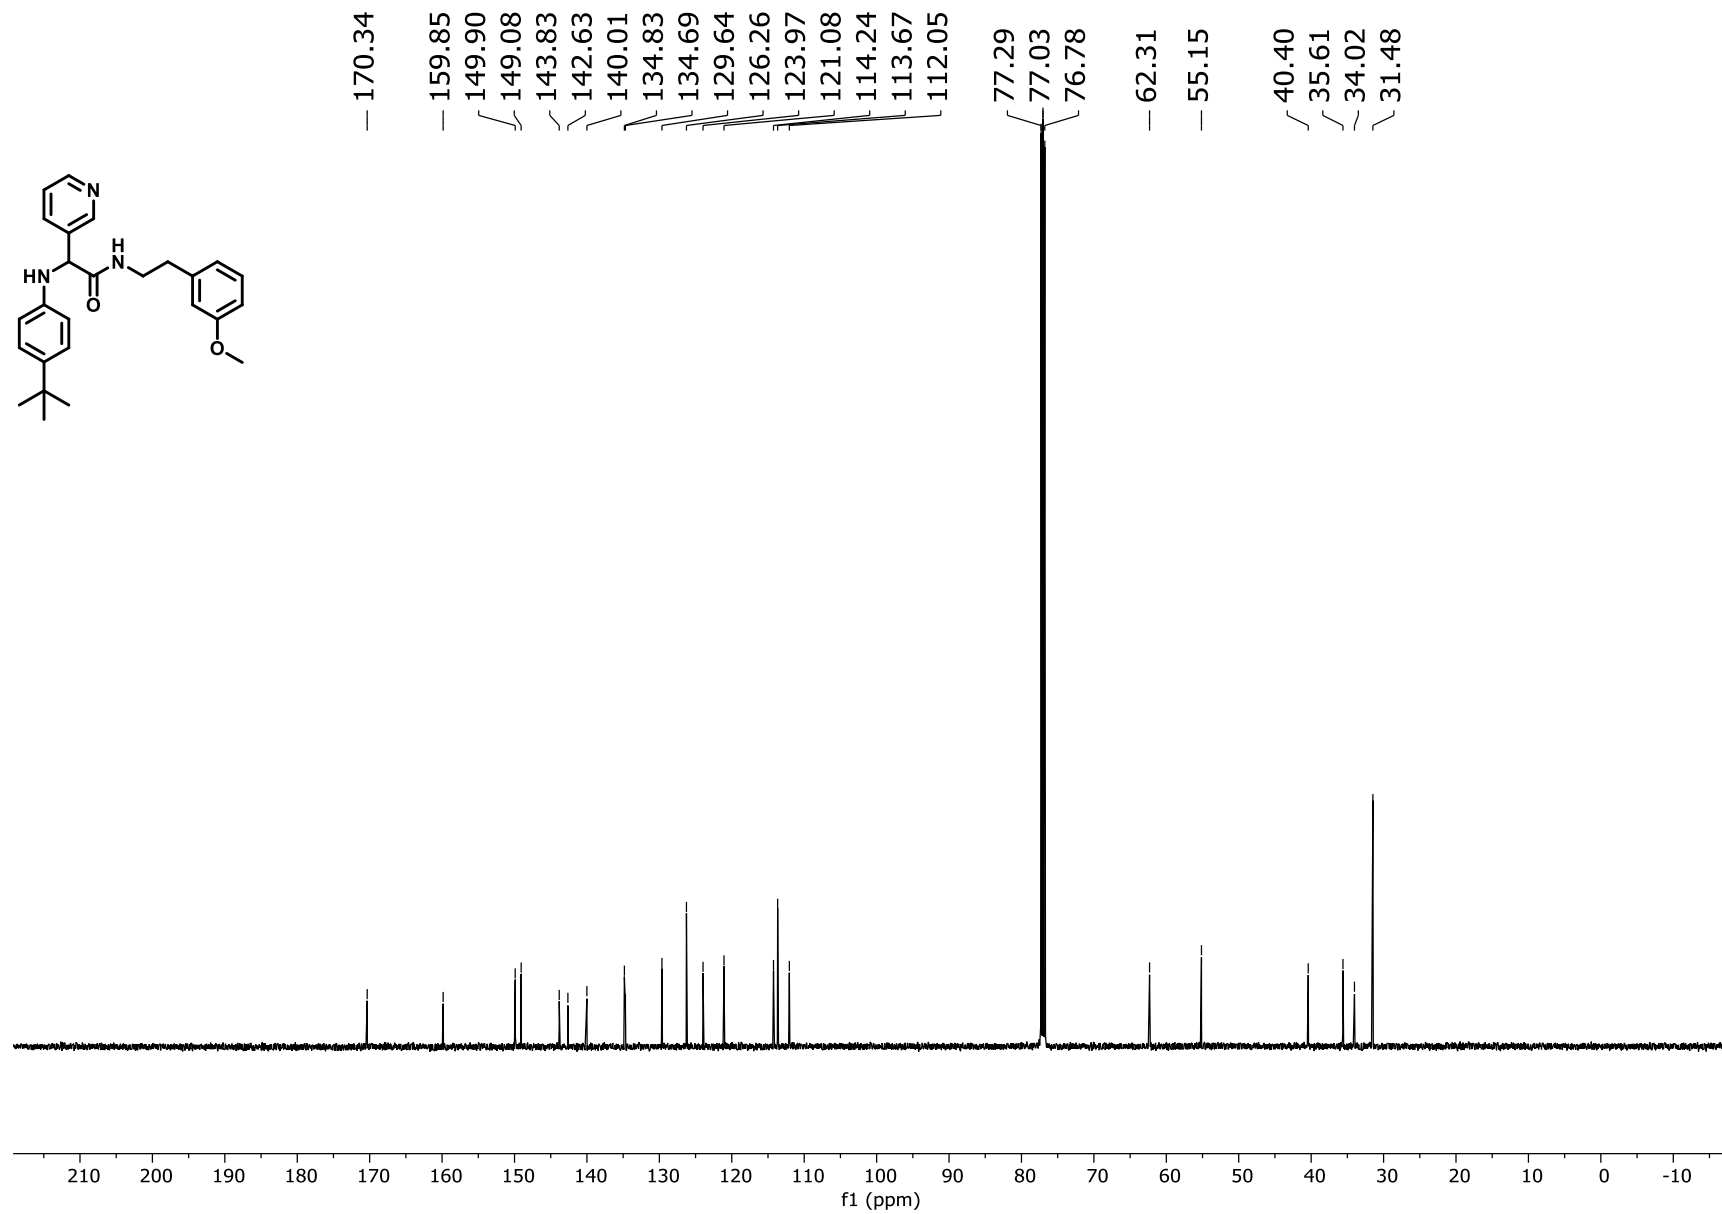

112. Compound 28e <sup>1</sup>H NMR

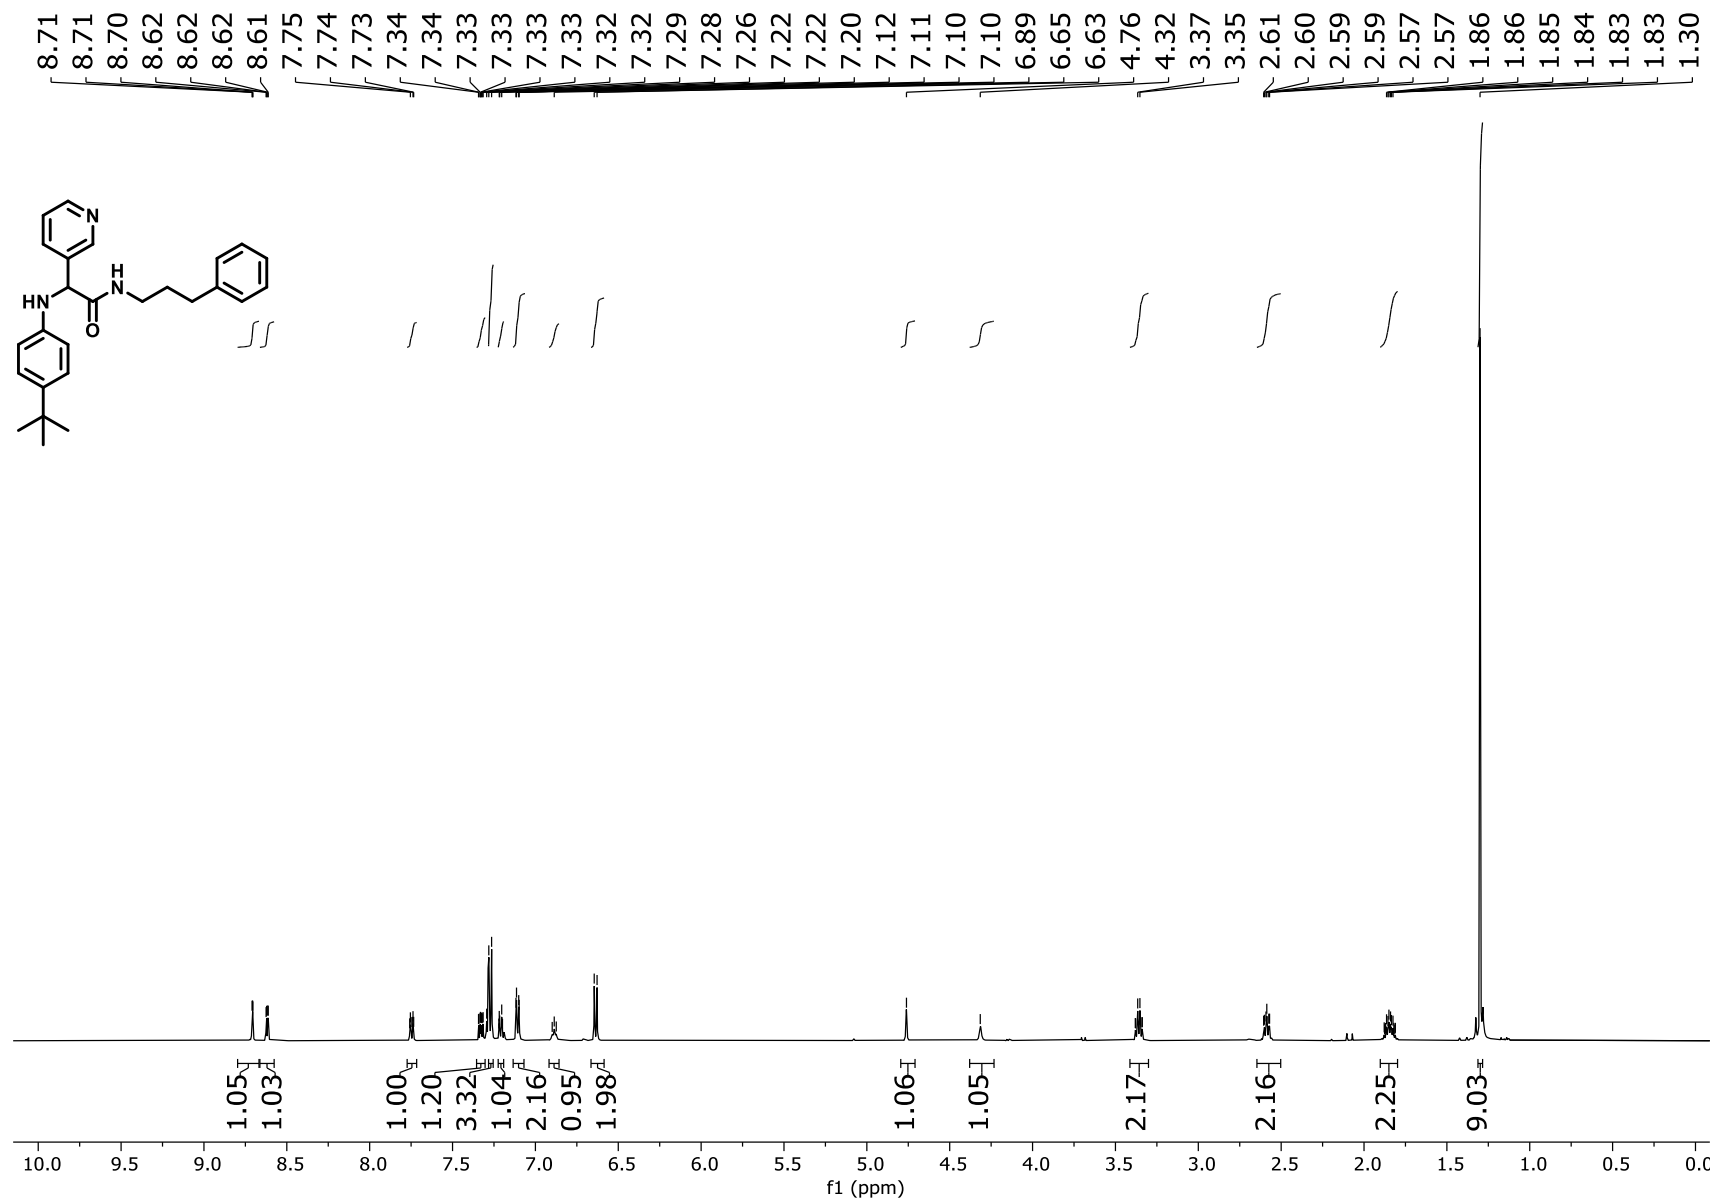

113. Compound 28e <sup>13</sup>C NMR

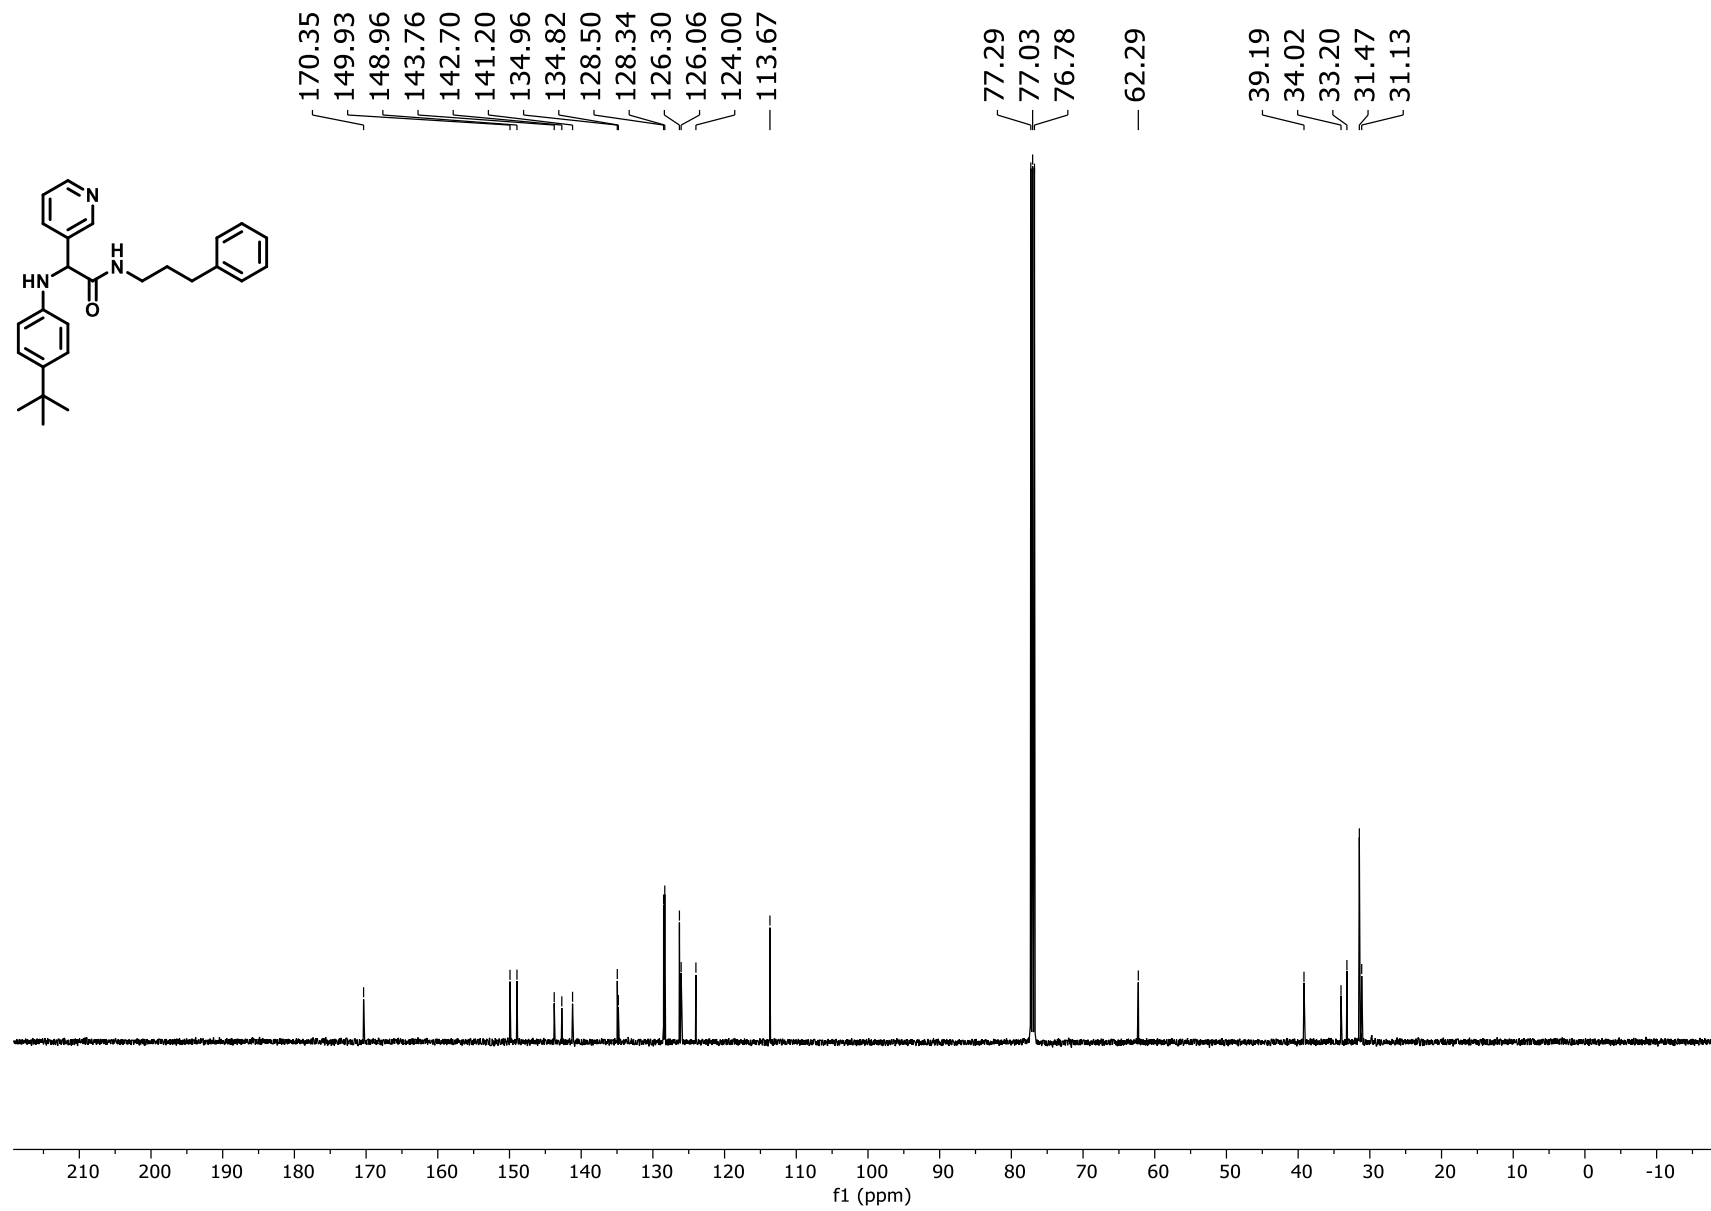

114. Compound 28f <sup>1</sup>H NMR

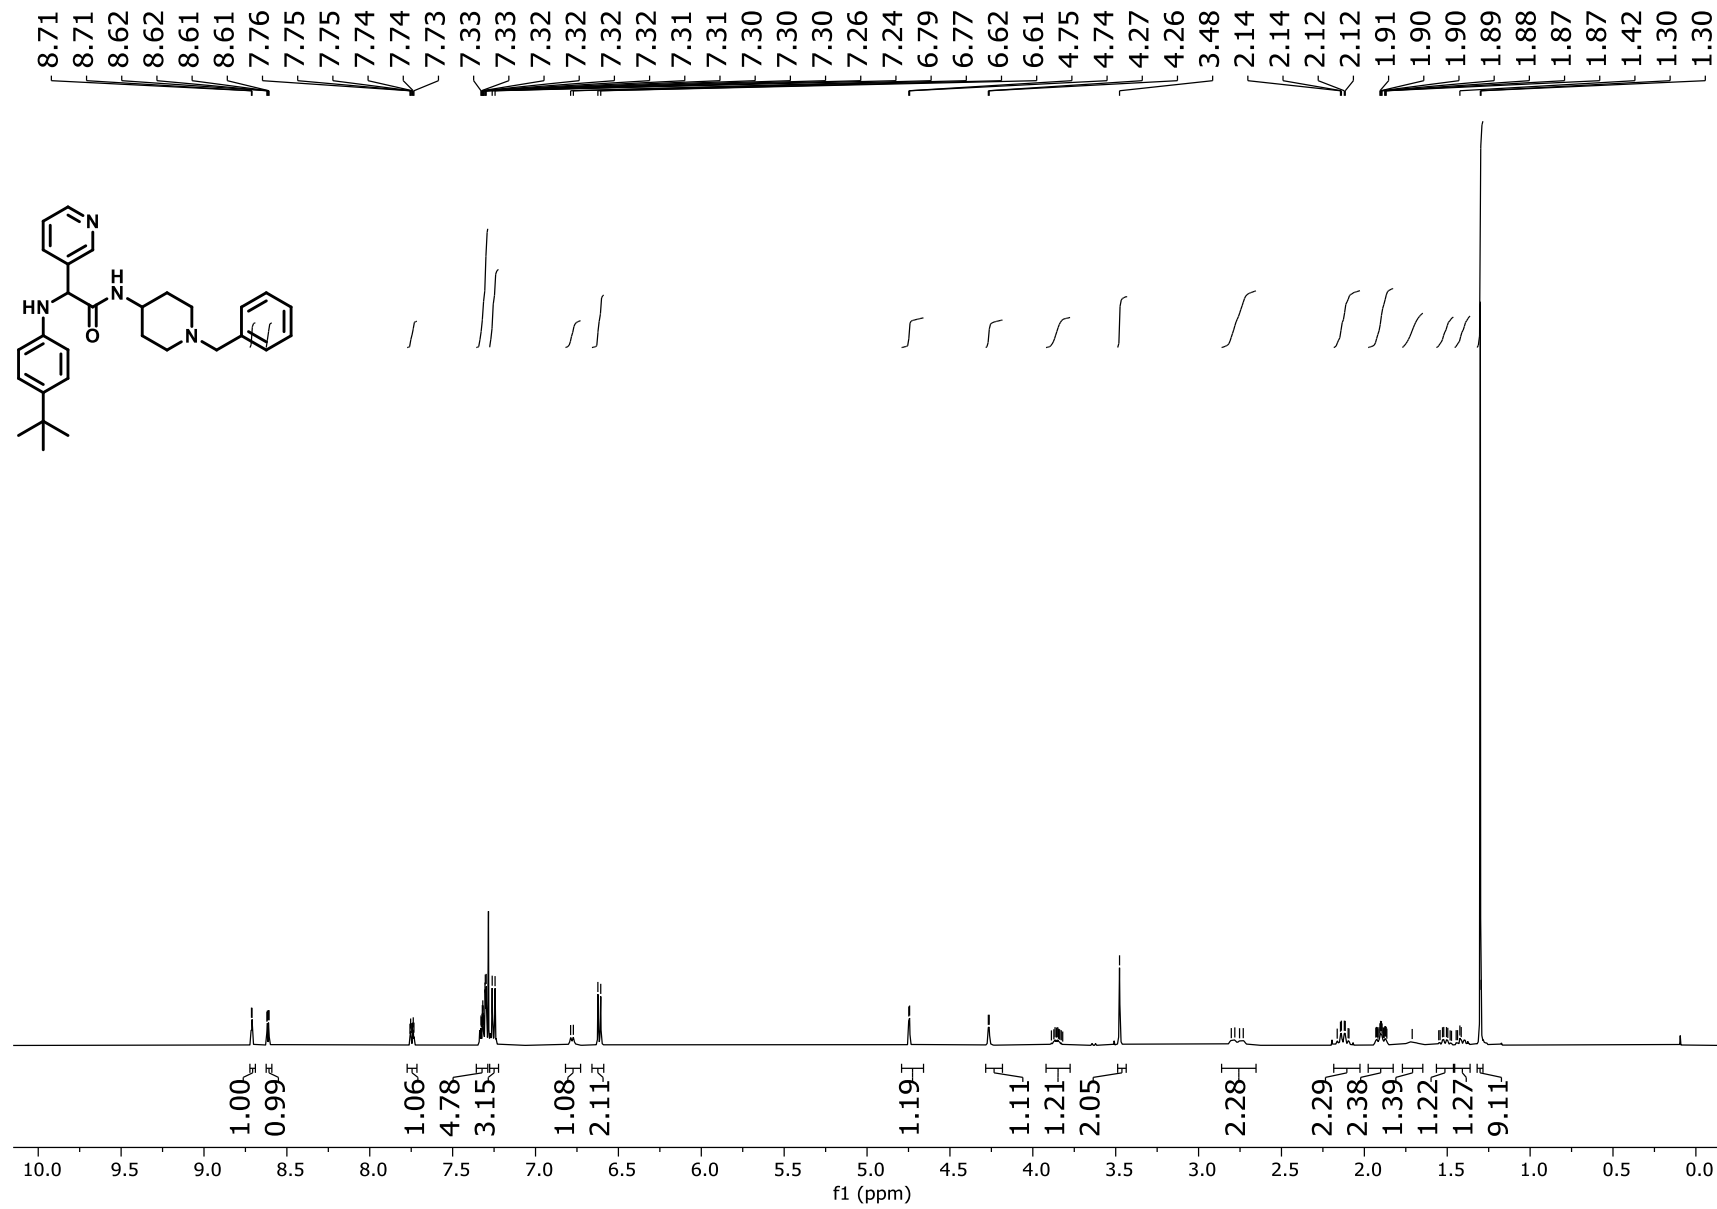



115. Compound 28f <sup>13</sup>C NMR

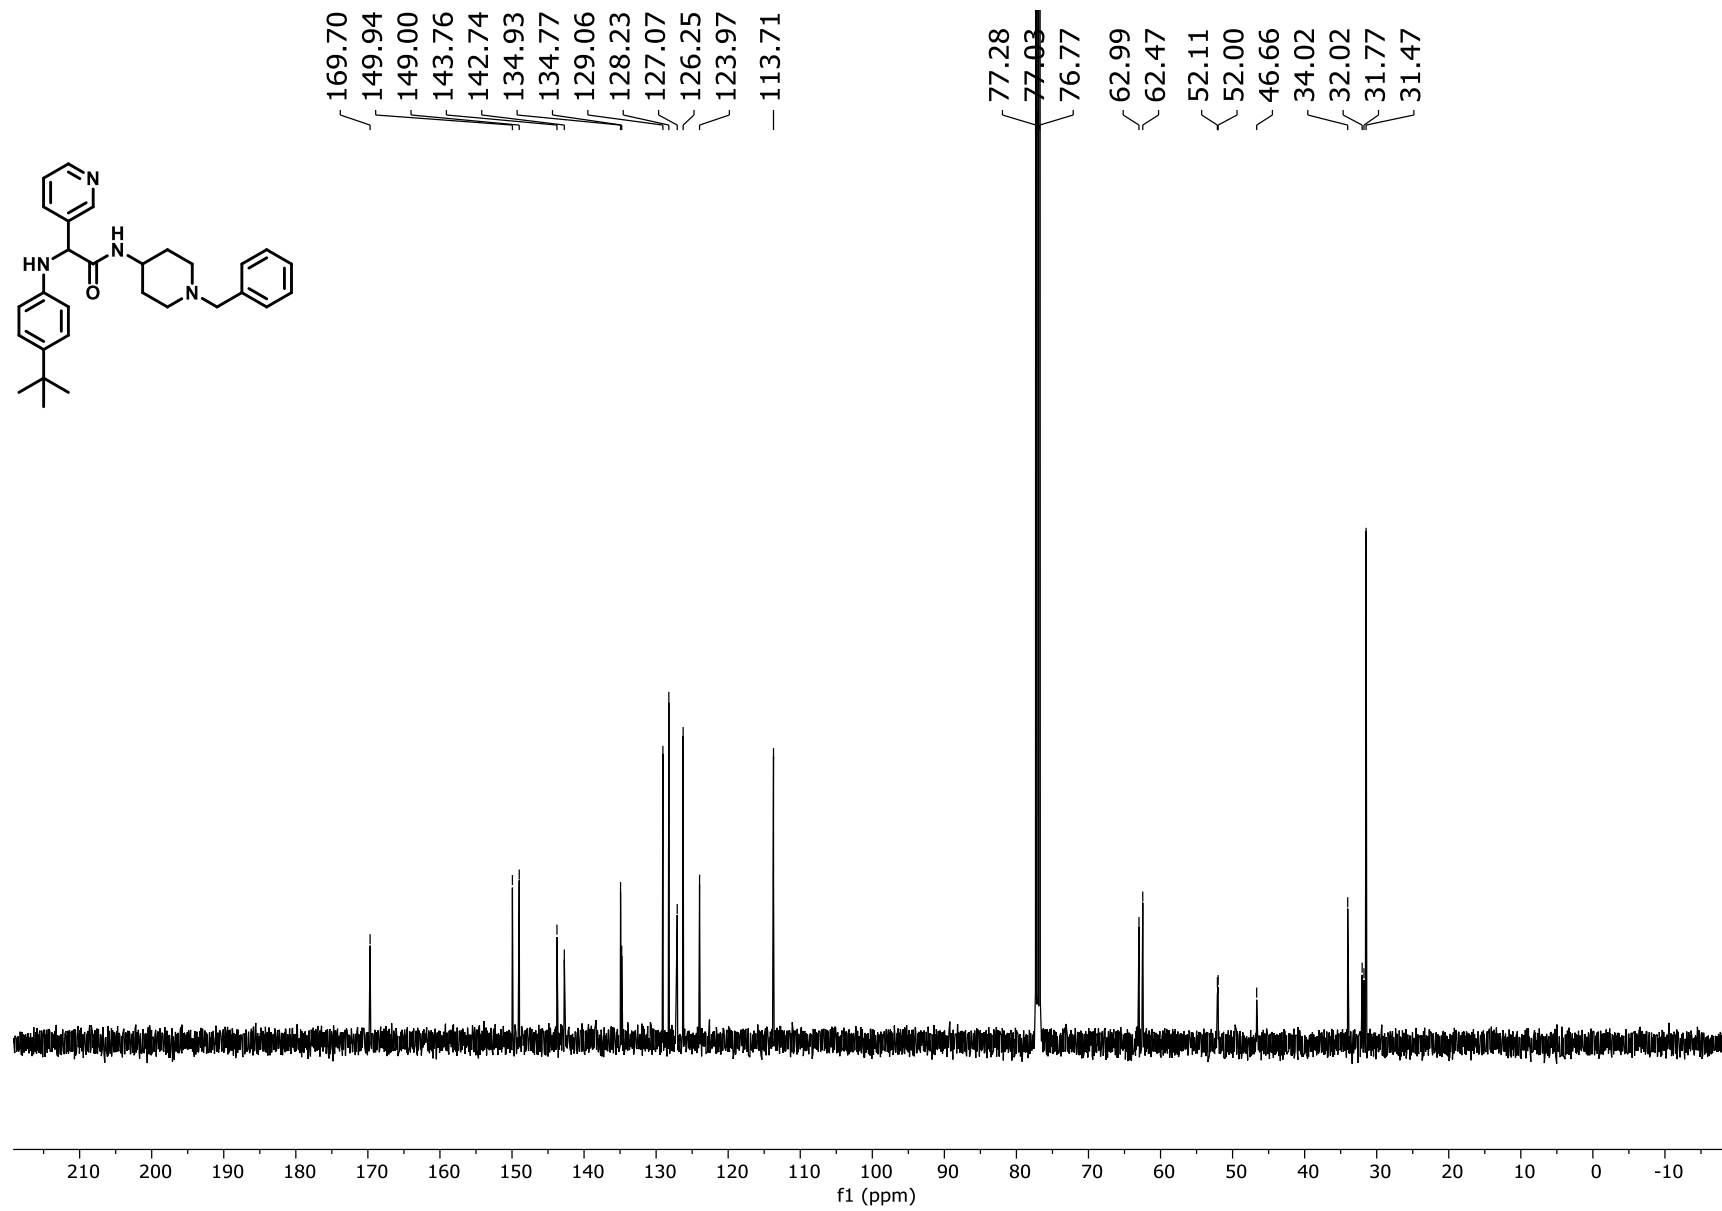

116. Compound 28g <sup>1</sup>H NMR

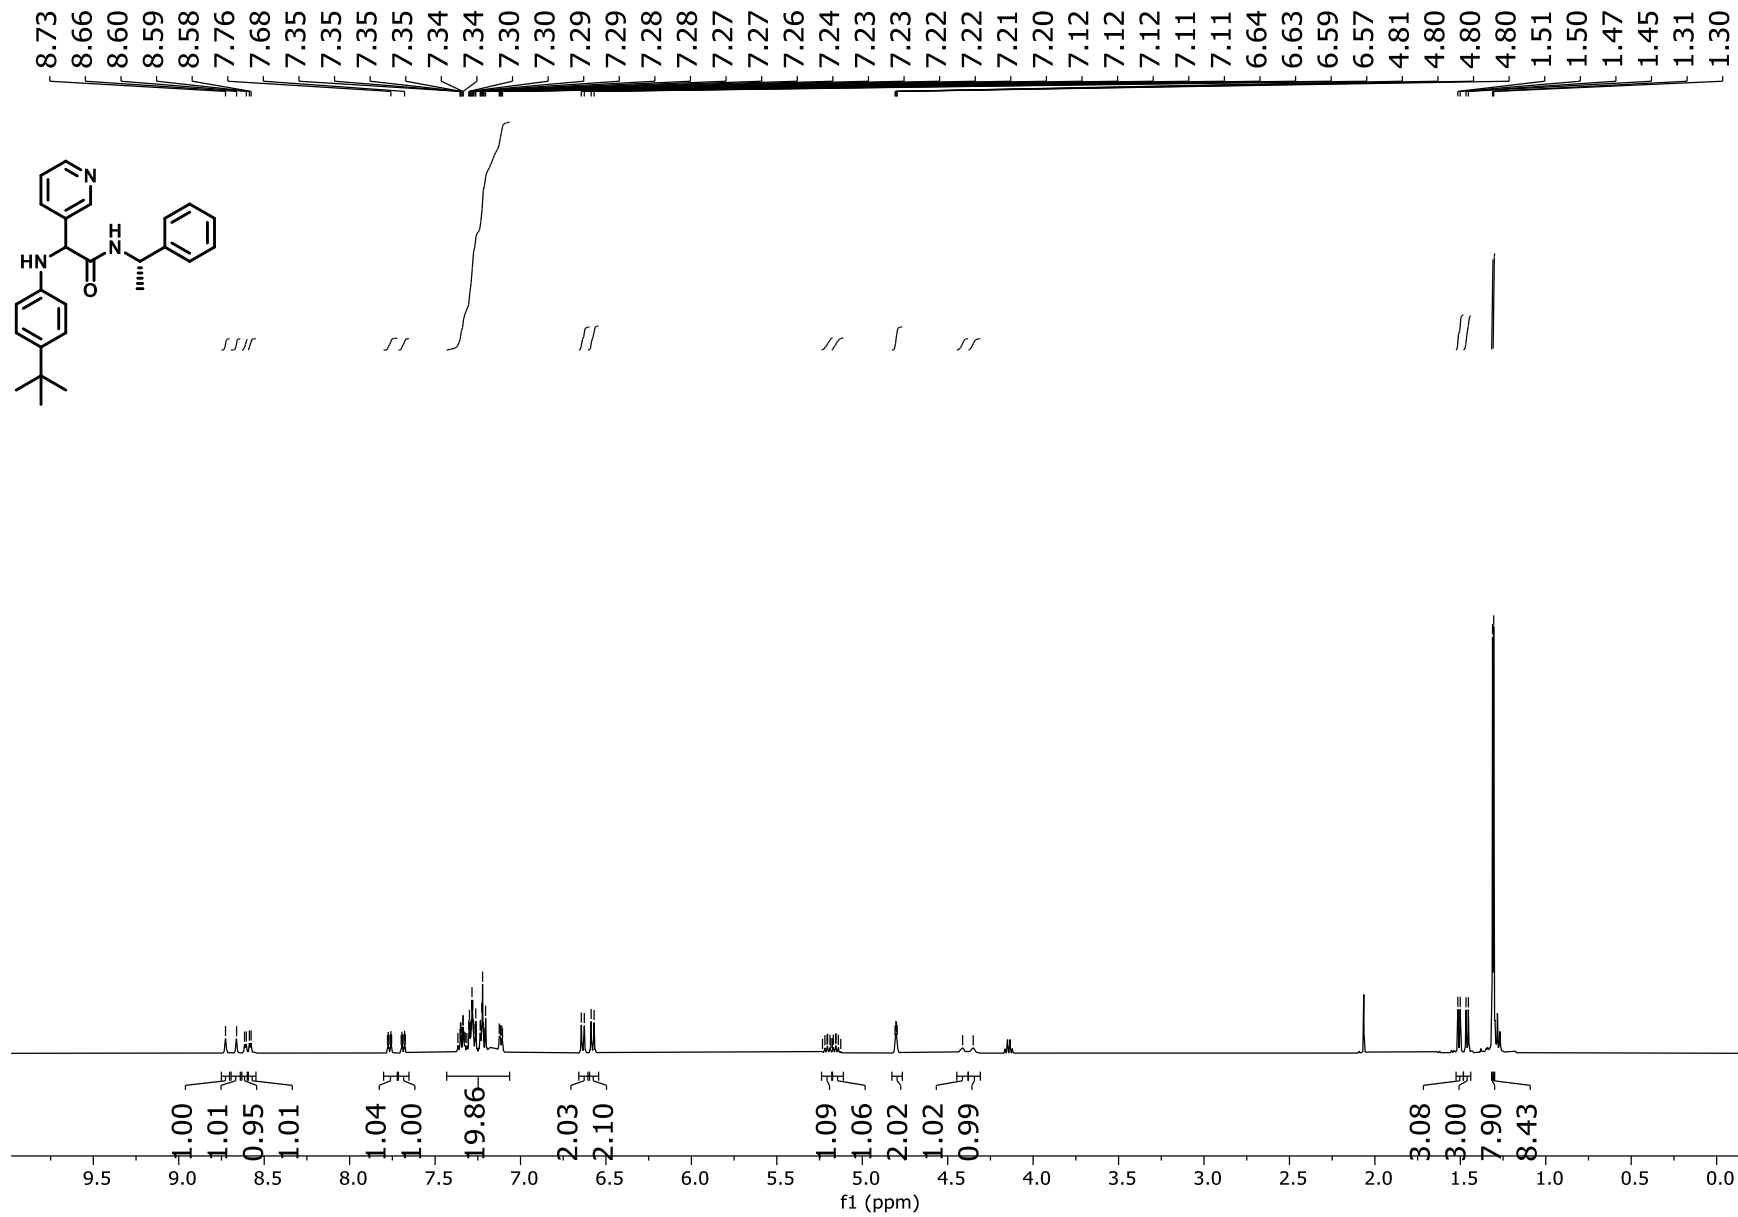

117. Compound 28g <sup>13</sup>C NMR

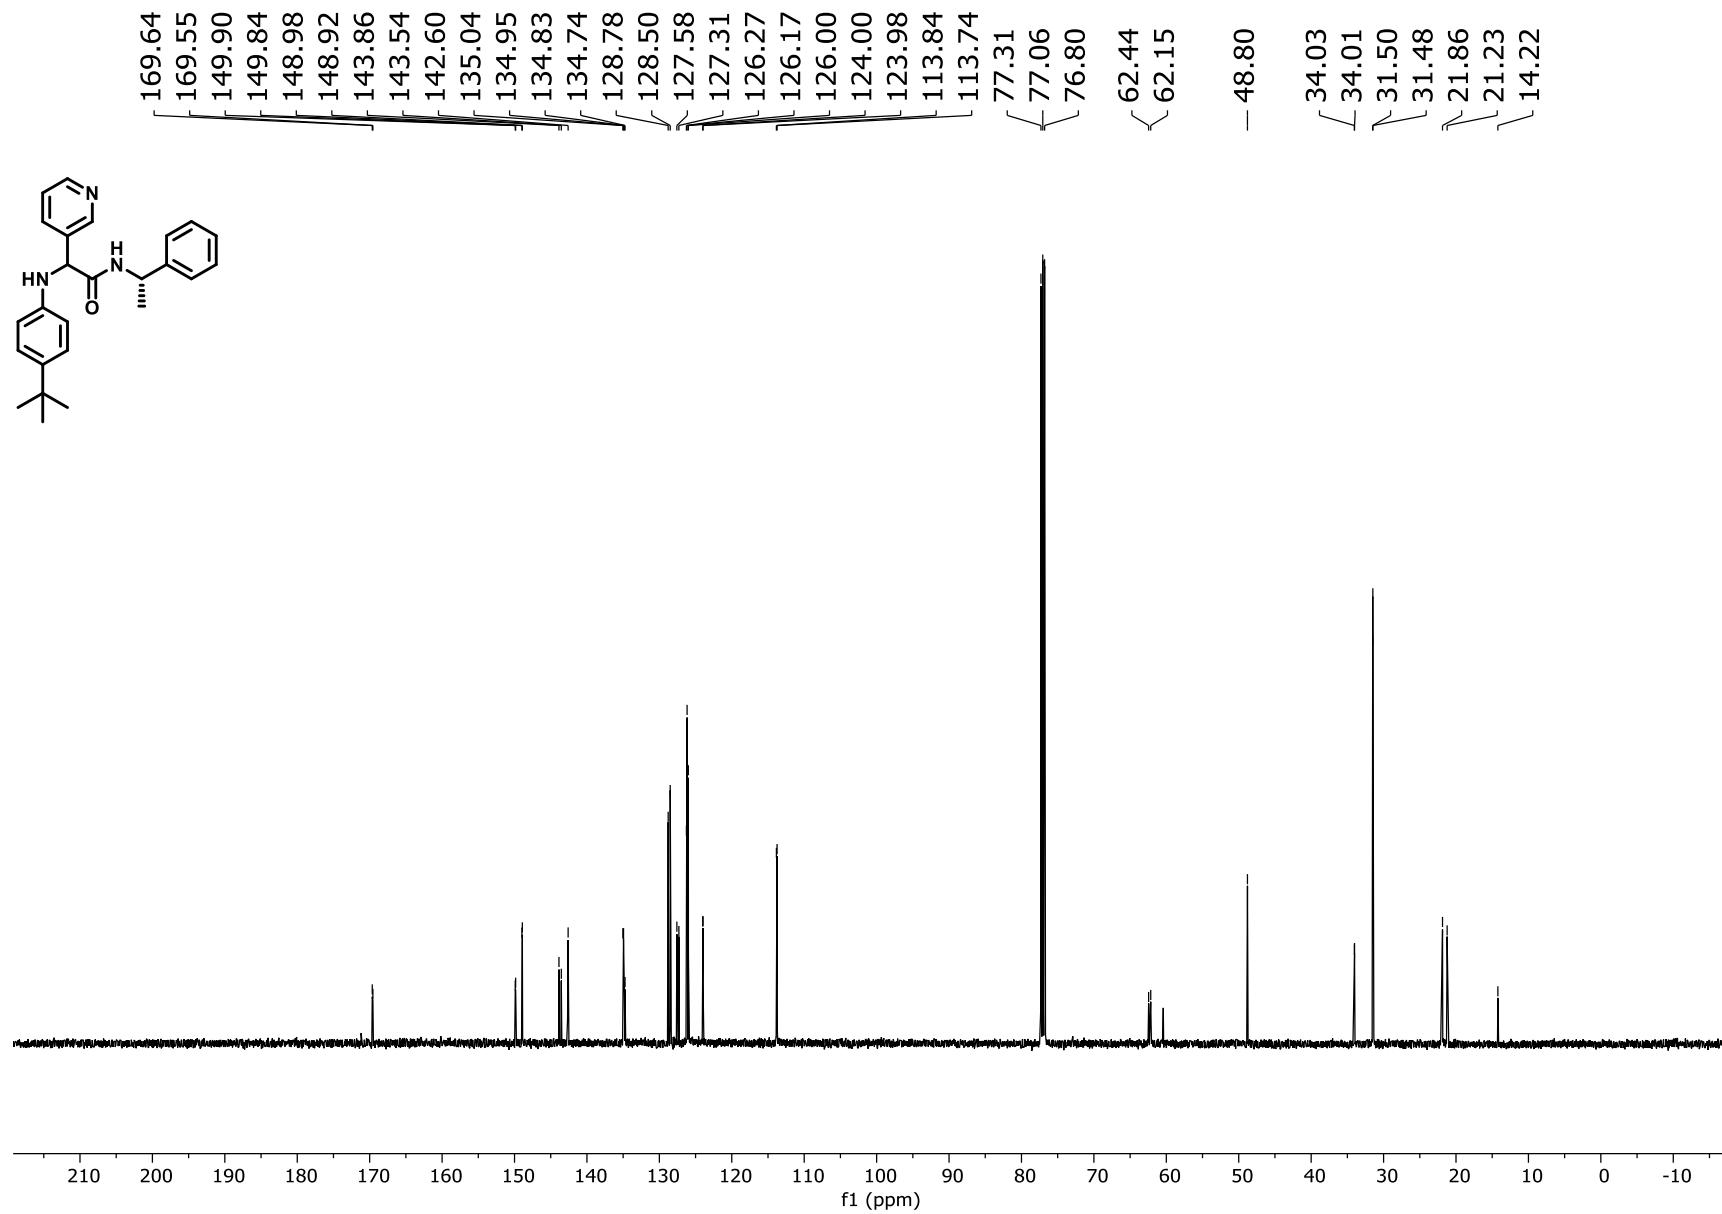

## 9. References

- (1) Efron, B.; Tibshirani, R. Bootstrap Methods for Standard Errors, Confidence Intervals, and Other Measures of Statistical Accuracy. *Stat. Sci.* **1986**, *1*, 54-75.
